# Supplementary material
Source: Frontiers journal article supplement (https://www.frontiersin.org/articles/412501)
Supplement: Table_1.XLSX [file Table_1.XLSX]

## Sheet: TableS1
Table S1.
Date	Time (CTD Sampled)	Cast #	Latitude	Longitude	Depth (m)	Volume Per Filter	Prescreen
2015-07-31	1904-01-01 18:57:00	S47C1	24 32.102	156 18.565	15	3.5 L	100 μm
2015-07-31	1904-01-01 22:36:00	S49C1	24 29.828	156 18.432	15	3.5 L	100 μm
2015-08-01	1904-01-01 02:51:00	S51C1	24 29.978	156 18.715	15	3.5 L	100 μm
2015-08-01	1904-01-01 06:49:00	S52C1	24 29.752	156 17.862	15	3.5 L	100 μm
2015-08-01	1904-01-01 12:52:00	S53C1	24 29.874	156 18.114	15	3.5 L	100 μm
2015-08-01	1904-01-01 14:54:00	S54C1	24 28.889	156 18.043	15	3.5 L	100 μm
2015-08-01	1904-01-01 18:46:00	S55C1	24 28.697	156 17.802	15	3.5 L	100 μm
2015-08-01	1904-01-01 22:42:00	S56C1	24 28.370	156 17.574	15	3.5 L	100 μm
2015-08-02	1904-01-01 02:57:00	S57C1	24 24.917	156 18.835	15	3.5 L	100 μm
2015-08-02	1904-01-01 06:56:00	S58C1	24 24.822	156 18.886	15	3.5 L	100 μm
2015-08-02	1904-01-01 10:52:00	S60C1	24 24.798	156 18.737	15	3.5 L	100 μm
2015-08-02	1904-01-01 14:46:00	S61C1	24 24.281	156 21.318	15	3.5 L	100 μm
2015-08-02	1904-01-01 18:57:00	S63C1	24 23.868	156 21.008	15	3.5 L	100 μm
2015-08-02	1904-01-01 22:52:00	S64C1	24 21.701	156 20.598	15	3.5 L	100 μm
2015-08-03	1904-01-01 02:47:00	S66C1	24 20.768	156 20.802	15	3.5 L	100 μm
2015-08-03	1904-01-01 06:47:00	S67C1	24 20.911	156 18.824	15	3.5 L	100 μm
2015-08-03	1904-01-01 10:49:00	S68C1	24 17.375	156 24.496	15	3.5 L	100 μm
2015-08-03	1904-01-01 14:51:00	S69C1	24 17.144	156 24.716	15	3.5 L	100 μm
2015-08-03	1904-01-01 18:53:00	S70C1	24 16.990	156 23.242	15	3.5 L	100 μm
