# Supplementary material
Source: Frontiers journal article supplement (https://www.frontiersin.org/articles/412501)
Supplement: Table_2.XLSX [file Table_2.XLSX]

## Sheet: TableS2
Table S2.
rDNA	rRNA	Taxa	Taxa2	PR2
840	41065	Alveolates-Ciliates	Oligohymenophorea	Eukaryota; Alveolata; Ciliophora; Oligohymenophorea; Scuticociliatia; Scuticociliatia-1; Scuticociliatia-1_X; Scuticociliatia-1_X_sp.;
2699	19183	Alveolates-Ciliates	Colpodea	Eukaryota; Alveolata; Ciliophora; Colpodea; Colpodea-1; Colpodea-1_X; Colpodea-1_XX; Colpodea-1_XX_sp.;
1340	10950	Alveolates-Ciliates	Phyllopharyngea	Eukaryota; Alveolata; Ciliophora; Phyllopharyngea; Cyrtophoria; Chlamydodontidae; Chlamydodon; Chlamydodon_sp.;
1136	9323	Alveolates-Ciliates	Spirotrichea	Eukaryota; Alveolata; Ciliophora; Spirotrichea; Strombidiida; Tontoniidae_B; Pseudotontonia; Pseudotontonia_simplicidens;
388	7836	Alveolates-Ciliates	Spirotrichea	Eukaryota; Alveolata; Ciliophora; Spirotrichea; Strombidiida; Tontoniidae_A; Tontoniidae_A_X; Tontoniidae_A_X_sp.;
312	7480	Alveolates-Ciliates	Spirotrichea	Eukaryota; Alveolata; Ciliophora; Spirotrichea; Strombidiida; Strombidiidae_L; Strombidiidae_L_X; Strombidiidae_L_X_sp.;
309	7261	Alveolates-Ciliates	Spirotrichea	Eukaryota; Alveolata; Ciliophora; Spirotrichea; Strombidiida; Strombidiidae_J; Strombidiidae_J_X; Strombidiidae_J_X_sp.;
896	6181	Alveolates-Ciliates	Spirotrichea	Eukaryota; Alveolata; Ciliophora; Spirotrichea; Strombidiida; Strombidiidae_H; Strombidiidae_H_X; Strombidiidae_H_X_sp.;
470	5861	Alveolates-Ciliates	Spirotrichea	Eukaryota; Alveolata; Ciliophora; Spirotrichea; Strombidiida_D; Strombidiida_D_X; Strombidiida_D_XX; Strombidiida_D_XX_sp.;
263	5710	Alveolates-Ciliates	Spirotrichea	Eukaryota; Alveolata; Ciliophora; Spirotrichea; Strombidiida; Strombidiida_X; Strombidiida_XX; Strombidiida_XX_sp.;
92	4143	Alveolates-Ciliates	Litostomatea	Eukaryota; Alveolata; Ciliophora; Litostomatea; Cyclotrichia; Cyclotrichia_X; Cyclotrichia_XX; Cyclotrichia_XX_sp.;
312	3948	Alveolates-Ciliates	Spirotrichea	Eukaryota; Alveolata; Ciliophora; Spirotrichea; Strombidiida; Tontoniidae_A; Spirotontonia; Spirotontonia_sp.;
7	3512	Alveolates-Ciliates	Litostomatea	Eukaryota; Alveolata; Ciliophora; Litostomatea; Haptoria; Didiniidae; Didiniidae_X; Didiniidae_X_sp.;
465	3273	Alveolates-Ciliates	Spirotrichea	Eukaryota; Alveolata; Ciliophora; Spirotrichea; Strombidiida; Strombidiidae_B; Strombidiidae_B_X; Strombidiidae_B_X_sp.;
124	3264	Alveolates-Ciliates	Prostomatea	Eukaryota; Alveolata; Ciliophora; Prostomatea; Prostomatea_X; Colepidae; Colepidae_X; Colepidae_X_sp.;
248	3008	Alveolates-Ciliates	Spirotrichea	Eukaryota; Alveolata; Ciliophora; Spirotrichea; Choreotrichida; Leegaardiellidae_B; Leegaardiella; Leegaardiella_sp.;
310	2531	Alveolates-Ciliates	Spirotrichea	Eukaryota; Alveolata; Ciliophora; Spirotrichea; Choreotrichida; Strobilidiidae_I; Pelagostrobilidium; Pelagostrobilidium_sp.;
178	1869	Alveolates-Ciliates	Spirotrichea	Eukaryota; Alveolata; Ciliophora; Spirotrichea; Strombidiida_G; Strombidiida_G_X; Strombidiida_G_XX; Strombidiida_G_XX_sp.;
963	1852	Alveolates-Ciliates	Spirotrichea	Eukaryota; Alveolata; Ciliophora; Spirotrichea; Tintinnida; Rhabdonellidae; Metacylis; Metacylis_sp.;
1369	1577	Alveolates-Ciliates	Phyllopharyngea	Eukaryota; Alveolata; Ciliophora; Phyllopharyngea; Cyrtophoria; Chlamydodontidae; Chlamydodontidae_X; Chlamydodontidae_X_sp.;
43	1565	Alveolates-Ciliates	Spirotrichea	Eukaryota; Alveolata; Ciliophora; Spirotrichea; Strombidiida_E; Strombidiida_E_X; Strombidiida_E_XX; Strombidiida_E_XX_sp.;
388	1387	Alveolates-Ciliates	Spirotrichea	Eukaryota; Alveolata; Ciliophora; Spirotrichea; Strombidiida; Strombidiidae_M; Strombidium_M; Strombidium_M_sp.;
59	1310	Alveolates-Ciliates	Spirotrichea	Eukaryota; Alveolata; Ciliophora; Spirotrichea; Strombidiida_F; Strombidiida_F_X; Strombidiida_F_XX; Strombidiida_F_XX_sp.;
25	1133	Alveolates-Ciliates	Spirotrichea	Eukaryota; Alveolata; Ciliophora; Spirotrichea; Strombidiida; Strombidiidae_G; Strombidiidae_G_X; Strombidiidae_G_X_sp.;
26	806	Alveolates-Ciliates	Spirotrichea	Eukaryota; Alveolata; Ciliophora; Spirotrichea; Strombidiida; Strombidiidae_O; Strombidiidae_O_X; Strombidiidae_O_X_sp.;
34	772	Alveolates-Ciliates	Spirotrichea	Eukaryota; Alveolata; Ciliophora; Spirotrichea; Strombidiida; Tontoniidae_B; Pseudotontonia; Pseudotontonia_sp.;
222	769	Alveolates-Ciliates	Spirotrichea	Eukaryota; Alveolata; Ciliophora; Spirotrichea; Tintinnida; TIN_02; Climacocylis; Climacocylis_scalaria;
80	766	Alveolates-Ciliates	Spirotrichea	Eukaryota; Alveolata; Ciliophora; Spirotrichea; Choreotrichida; Strombidinopsidae; Strombidinopsis; Strombidinopsis_acuminata;
64	565	Alveolates-Ciliates	Spirotrichea	Eukaryota; Alveolata; Ciliophora; Spirotrichea; Choreotrichida; Strobilidiidae_I; Strobilidiidae_I_X; Strobilidiidae_I_X_sp.;
356	563	Alveolates-Ciliates	Spirotrichea	Eukaryota; Alveolata; Ciliophora; Spirotrichea; Tintinnida; Tintinnidae; Steenstrupiella; Steenstrupiella_steenstrupii;
128	505	Alveolates-Ciliates	Spirotrichea	Eukaryota; Alveolata; Ciliophora; Spirotrichea; Choreotrichida; Choreotrichida_X; Choreotrichida_XX; Choreotrichida_XX_sp.;
207	464	Alveolates-Ciliates	Spirotrichea	Eukaryota; Alveolata; Ciliophora; Spirotrichea; Tintinnida; Eutintinnidae; Eutintinnus; Eutintinnus_medius;
17	353	Alveolates-Ciliates	Spirotrichea	Eukaryota; Alveolata; Ciliophora; Spirotrichea; Strombidiida; Strombidiidae; Strombidiidae_X; Strombidiidae_X_sp.;
52	294	Alveolates-Ciliates	Spirotrichea	Eukaryota; Alveolata; Ciliophora; Spirotrichea; Strombidiida; Strombidiidae_K; Strombidiidae_K_X; Strombidiidae_K_X_sp.;
125	280	Alveolates-Ciliates	Spirotrichea	Eukaryota; Alveolata; Ciliophora; Spirotrichea; Choreotrichida; Lynnellidae; Lynnella; Lynnella_semiglobulosa;
28	235	Alveolates-Ciliates	Spirotrichea	Eukaryota; Alveolata; Ciliophora; Spirotrichea; Tintinnida; Epiplocylididae; Epiplocyloides; Epiplocyloides_ralumensis;
3	195	Alveolates-Ciliates	Spirotrichea	Eukaryota; Alveolata; Ciliophora; Spirotrichea; Strombidiida; Tontoniidae_A; Spirotontonia; Spirotontonia_grandis;
35	171	Alveolates-Ciliates	Spirotrichea	Eukaryota; Alveolata; Ciliophora; Spirotrichea; Tintinnida; Eutintinnidae; Eutintinnus; Eutintinnus_sp.;
58	141	Alveolates-Ciliates	Phyllopharyngea	Eukaryota; Alveolata; Ciliophora; Phyllopharyngea; Phyllopharyngea_X; Phyllopharyngea_XX; Phyllopharyngea_XXX; Phyllopharyngea_XXX_sp.;
92	134	Alveolates-Ciliates	Spirotrichea	Eukaryota; Alveolata; Ciliophora; Spirotrichea; Tintinnida; TIN_03; TIN_03_X; TIN_03_X_sp.;
84	97	Alveolates-Ciliates	Spirotrichea	Eukaryota; Alveolata; Ciliophora; Spirotrichea; Tintinnida; Tintinnidae; Tintinnidae_X; Tintinnidae_X_sp.;
37	97	Alveolates-Ciliates	Spirotrichea	Eukaryota; Alveolata; Ciliophora; Spirotrichea; Tintinnida; Eutintinnidae; Eutintinnus; Eutintinnus_lususundae;
90	69	Alveolates-Ciliates	Spirotrichea	Eukaryota; Alveolata; Ciliophora; Spirotrichea; Tintinnida; Xystonellidae; Dadayiella; Dadayiella_ganymedes;
135	57	Alveolates-Ciliates	Spirotrichea	Eukaryota; Alveolata; Ciliophora; Spirotrichea; Tintinnida; Undellidae; Undella; Undella_claparedei;
1	57	Alveolates-Ciliates	Spirotrichea	Eukaryota; Alveolata; Ciliophora; Spirotrichea; Strombidiida; Strombidiidae; Parallelostrombidium; Parallelostrombidium_obesum;
31	50	Alveolates-Ciliates	Spirotrichea	Eukaryota; Alveolata; Ciliophora; Spirotrichea; Hypotrichia; Oxytrichidae; Oxytrichidae_X; Oxytrichidae_X_sp.;
18	48	Alveolates-Ciliates	Spirotrichea	Eukaryota; Alveolata; Ciliophora; Spirotrichea; Tintinnida; Eutintinnidae; Eutintinnus; Eutintinnus_fraknoi;
5	41	Alveolates-Ciliates	Oligohymenophorea	Eukaryota; Alveolata; Ciliophora; Oligohymenophorea; Apostomatia; Foettingeriidae; Vampyrophrya; Vampyrophrya_pelagica;
201	41	Alveolates-Ciliates	Prostomatea	Eukaryota; Alveolata; Ciliophora; Prostomatea; Prostomatea_X; Placidae; Spathidiopsis; Spathidiopsis_buddenbrocki;
2	41	Alveolates-Ciliates	Spirotrichea	Eukaryota; Alveolata; Ciliophora; Spirotrichea; Strombidiida; Strombidiidae_P; Strombidiidae_P_X; Strombidiidae_P_X_sp.;
31	38	Alveolates-Ciliates	Spirotrichea	Eukaryota; Alveolata; Ciliophora; Spirotrichea; Tintinnida; Tintinnidae; Amphorides; Amphorides_quadrilineata;
26	28	Alveolates-Ciliates	Spirotrichea	Eukaryota; Alveolata; Ciliophora; Spirotrichea; Choreotrichida; Strobilidiidae_A; Strobilidiidae_A_X; Strobilidiidae_A_X_sp.;
0	23	Alveolates-Ciliates	Litostomatea	Eukaryota; Alveolata; Ciliophora; Litostomatea; Cyclotrichia; Mesodiniidae; Mesodiniidae_X; Mesodiniidae_X_sp.;
0	23	Alveolates-Ciliates	Spirotrichea	Eukaryota; Alveolata; Ciliophora; Spirotrichea; Hypotrichia; Oxytrichidae; Oxytricha; Oxytricha_sp.;
1	21	Alveolates-Ciliates	Spirotrichea	Eukaryota; Alveolata; Ciliophora; Spirotrichea; Strombidiida_B; Strombidiida_B_X; Strombidiida_B_XX; Strombidiida_B_XX_sp.;
2	17	Alveolates-Ciliates	Spirotrichea	Eukaryota; Alveolata; Ciliophora; Spirotrichea; Strombidiida; Tontoniidae_B; Tontoniidae_B_X; Tontoniidae_B_X_sp.;
6	15	Alveolates-Ciliates	Spirotrichea	Eukaryota; Alveolata; Ciliophora; Spirotrichea; Tintinnida; Rhabdonellidae; Schmidingerella; Schmidingerella_sp.;
0	14	Alveolates-Ciliates	Oligohymenophorea	Eukaryota; Alveolata; Ciliophora; Oligohymenophorea; Apostomatia; Foettingeriidae; Foettingeriidae_X; Foettingeriidae_X_sp.;
1	11	Alveolates-Ciliates	Spirotrichea	Eukaryota; Alveolata; Ciliophora; Spirotrichea; Choreotrichida; Strombidinopsidae; Strombidinopsis; Strombidinopsis_sp.;
0	10	Alveolates-Ciliates	Spirotrichea	Eukaryota; Alveolata; Ciliophora; Spirotrichea; Strombidiida; Strombidiidae_N; Strombidium_N; Strombidium_N_sp.;
0	9	Alveolates-Ciliates	Spirotrichea	Eukaryota; Alveolata; Ciliophora; Spirotrichea; Tintinnida; Epiplocylididae; Epiplocylis; Epiplocylis_undella;
0	7	Alveolates-Ciliates	Prostomatea	Eukaryota; Alveolata; Ciliophora; Prostomatea; Prostomatea_X; Colepidae; Tiarina; Tiarina_fusa;
4	7	Alveolates-Ciliates	Spirotrichea	Eukaryota; Alveolata; Ciliophora; Spirotrichea; Tintinnida; Rhabdonellidae; Metacylis; Metacylis_angulata;
1	7	Alveolates-Ciliates	Spirotrichea	Eukaryota; Alveolata; Ciliophora; Spirotrichea; Tintinnida; Tintinnidae; Amphorellopsis; Amphorellopsis_sp.;
0	7	Alveolates-Ciliates	Spirotrichea	Eukaryota; Alveolata; Ciliophora; Spirotrichea; Strombidiida; Strombidiidae_M; Strombidiidae_M_X; Strombidiidae_M_X_sp.;
0	5	Alveolates-Ciliates	Prostomatea	Eukaryota; Alveolata; Ciliophora; Prostomatea; Prostomatea-1; Prostomatea-1_X; Prostomatea-1_XX; Prostomatea-1_XX_sp.;
2	5	Alveolates-Ciliates	Spirotrichea	Eukaryota; Alveolata; Ciliophora; Spirotrichea; Strombidiida; Strombidiidae; Strombidium; Strombidium_sp.;
0	5	Alveolates-Ciliates	Spirotrichea	Eukaryota; Alveolata; Ciliophora; Spirotrichea; Strombidiida; Strombidiidae_Q; Strombidiidae_Q_X; Strombidiidae_Q_X_sp.;
0	5	Alveolates-Ciliates	Spirotrichea	Eukaryota; Alveolata; Ciliophora; Spirotrichea; Strombidiida; Tontoniidae_A; Laboea; Laboea_strobila;
17	4	Alveolates-Ciliates	Oligohymenophorea	Eukaryota; Alveolata; Ciliophora; Oligohymenophorea; Scuticociliatia; Scuticociliatia_X; Scuticociliatia_XX; Scuticociliatia_XX_sp.;
0	4	Alveolates-Ciliates	Oligohymenophorea	Eukaryota; Alveolata; Ciliophora; Oligohymenophorea; Oligohymenophorea_X; Oligohymenophorea_XX; Collinia; Collinia_sp.;
2	3	Alveolates-Ciliates	Litostomatea	Eukaryota; Alveolata; Ciliophora; Litostomatea; Litostomatea_X; Litostomatea_XX; Litostomatea_XXX; Litostomatea_XXX_sp.;
20	3	Alveolates-Ciliates	Spirotrichea	Eukaryota; Alveolata; Ciliophora; Spirotrichea; Tintinnida; Tintinnidae; Salpingella; Salpingella_acuminata;
0	3	Alveolates-Ciliates	Spirotrichea	Eukaryota; Alveolata; Ciliophora; Spirotrichea; Strombidiida; Strombidiidae_D; Strombidiidae_D_X; Strombidiidae_D_X_sp.;
0	2	Alveolates-Ciliates	Litostomatea	Eukaryota; Alveolata; Ciliophora; Litostomatea; Haptoria; Didiniidae; Didinium; Didinium_sp.;
0	2	Alveolates-Ciliates	Oligohymenophorea	Eukaryota; Alveolata; Ciliophora; Oligohymenophorea; Scuticociliatia; Cyclidiidae; Cyclidiidae_X; Cyclidiidae_X_sp.;
0	2	Alveolates-Ciliates	Spirotrichea	Eukaryota; Alveolata; Ciliophora; Spirotrichea; Strombidiida_G; Strombidiida_G_X; Strombidium_G_X; Strombidium_cf_basimorphum;
0	2	Alveolates-Ciliates	Spirotrichea	Eukaryota; Alveolata; Ciliophora; Spirotrichea; Tintinnida; Tintinnida_X; Tintinnida_XX; Tintinnida_XX_sp.;
5	1	Alveolates-Ciliates	Spirotrichea	Eukaryota; Alveolata; Ciliophora; Spirotrichea; Tintinnida; TIN_03; Tintinnopsis_03; Tintinnopsis_lacustris;
1	1	Alveolates-Ciliates	Spirotrichea	Eukaryota; Alveolata; Ciliophora; Spirotrichea; Hypotrichia; Holostichidae; Anteholosticha; Anteholosticha_gracilis;
0	1	Alveolates-Ciliates	Spirotrichea	Eukaryota; Alveolata; Ciliophora; Spirotrichea; Choreotrichida; Lynnellidae; Lynnella; Lynnella_sp.;
0	1	Alveolates-Ciliates	Spirotrichea	Eukaryota; Alveolata; Ciliophora; Spirotrichea; Hypotrichia; Hypotrichia_X; Hypotrichia_XX; Hypotrichia_XX_sp.;
0	1	Alveolates-Ciliates	Spirotrichea	Eukaryota; Alveolata; Ciliophora; Spirotrichea; Strombidiida; Strombidiidae_A; Strombidiidae_A_X; Strombidiidae_A_X_sp.;
0	1	Alveolates-Ciliates	Spirotrichea	Eukaryota; Alveolata; Ciliophora; Spirotrichea; Strombidiida; Strombidiidae_R; Strombidium_R; Strombidium_R_sp.;
0	1	Alveolates-Ciliates	Spirotrichea	Eukaryota; Alveolata; Ciliophora; Spirotrichea; Strombidiida; Strombidiidae; Parallelostrombidium; Parallelostrombidium_conicum;
0	1	Alveolates-Ciliates	Spirotrichea	Eukaryota; Alveolata; Ciliophora; Spirotrichea; Tintinnida; Rhabdonellidae; Protorhabdonella; Protorhabdonella_curta;
0	1	Alveolates-Ciliates	Spirotrichea	Eukaryota; Alveolata; Ciliophora; Spirotrichea; Tintinnida; Tintinnidae; Salpingella; Salpingella_sp.;
2	0	Alveolates-Ciliates	Litostomatea	Eukaryota; Alveolata; Ciliophora; Litostomatea; Trichostomatia; Ophryoscolecidae; Eudiplodinium; Eudiplodinium_maggii;
7	0	Alveolates-Ciliates	Oligohymenophorea	Eukaryota; Alveolata; Ciliophora; Oligohymenophorea; Scuticociliatia; Loxocephalidae; Paratetrahymena; Paratetrahymena_wassi;
3	0	Alveolates-Ciliates	Oligohymenophorea	Eukaryota; Alveolata; Ciliophora; Oligohymenophorea; Peritrichia; Peritrichia_X; Philaccolilus; Philaccolilus_mekus;
1	0	Alveolates-Ciliates	Spirotrichea	Eukaryota; Alveolata; Ciliophora; Spirotrichea; Strombidiida; Strombidiidae_D; Novistrombidium_D; Novistrombidium_sinicum;
542758	321562	Alveolates-Dinoflagellates	Dinophyceae	Eukaryota; Alveolata; Dinophyta; Dinophyceae; Dinophyceae_X; Dinophyceae_XX; Dinophyceae_XXX; Dinophyceae_XXX_sp.;
37812	28865	Alveolates-Dinoflagellates	Azadinium	Eukaryota; Alveolata; Dinophyta; Dinophyceae; Dinophyceae_X; Dinophyceae_XX; Azadinium; Azadinium_spinosum;
21096	11083	Alveolates-Dinoflagellates	Gyrodinium	Eukaryota; Alveolata; Dinophyta; Dinophyceae; Dinophyceae_X; Dinophyceae_XX; Gyrodinium; Gyrodinium_sp.;
12195	5457	Alveolates-Dinoflagellates	Pfiesteriaceae	Eukaryota; Alveolata; Dinophyta; Dinophyceae; Dinophyceae_X; Pfiesteriaceae; Pfiesteriaceae_X; Pfiesteriaceae_X_sp.;
14752	4555	Alveolates-Dinoflagellates	Prorocentrum	Eukaryota; Alveolata; Dinophyta; Dinophyceae; Dinophyceae_X; Dinophyceae_XX; Prorocentrum; Prorocentrum_sp.;
1202	1964	Alveolates-Dinoflagellates	Chytriodinium	Eukaryota; Alveolata; Dinophyta; Dinophyceae; Dinophyceae_X; Dinophyceae_XX; Chytriodinium; Chytriodinium_roseum;
5778	1806	Alveolates-Dinoflagellates	Adenoides	Eukaryota; Alveolata; Dinophyta; Dinophyceae; Dinophyceae_X; Dinophyceae_XX; Adenoides; Adenoides_eludens;
4312	1783	Alveolates-Dinoflagellates	Gymnodinium	Eukaryota; Alveolata; Dinophyta; Dinophyceae; Dinophyceae_X; Dinophyceae_XX; Gymnodinium; Gymnodinium_sp.;
6334	1312	Alveolates-Dinoflagellates	Protoperidinium	Eukaryota; Alveolata; Dinophyta; Dinophyceae; Dinophyceae_X; Dinophyceae_XX; Protoperidinium; Protoperidinium_sp.;
4957	1122	Alveolates-Dinoflagellates	Neoceratium	Eukaryota; Alveolata; Dinophyta; Dinophyceae; Dinophyceae_X; Dinophyceae_XX; Neoceratium; Neoceratium_petersii;
1851	1078	Alveolates-Dinoflagellates	Cochlodinium	Eukaryota; Alveolata; Dinophyta; Dinophyceae; Dinophyceae_X; Dinophyceae_XX; Cochlodinium; Cochlodinium_polykrikoides;
5549	912	Alveolates-Dinoflagellates	Cochlodinium	Eukaryota; Alveolata; Dinophyta; Dinophyceae; Dinophyceae_X; Dinophyceae_XX; Cochlodinium; Cochlodinium_fulvescens;
405	888	Alveolates-Dinoflagellates	Peridinium	Eukaryota; Alveolata; Dinophyta; Dinophyceae; Dinophyceae_X; Dinophyceae_XX; Peridinium; Peridinium_umbonatum;
1966	774	Alveolates-Dinoflagellates	Protoperidinium	Eukaryota; Alveolata; Dinophyta; Dinophyceae; Dinophyceae_X; Dinophyceae_XX; Protoperidinium; Protoperidinium_bipes;
653	702	Alveolates-Dinoflagellates	Spatulodinium	Eukaryota; Alveolata; Dinophyta; Dinophyceae; Dinophyceae_X; Noctilucales; Spatulodinium; Spatulodinium_sp.;
3475	695	Alveolates-Dinoflagellates	Woloszynskia	Eukaryota; Alveolata; Dinophyta; Dinophyceae; Suessiales; Suessiales_X; Woloszynskia; Woloszynskia_halophila;
2146	591	Alveolates-Dinoflagellates	Warnowia	Eukaryota; Alveolata; Dinophyta; Dinophyceae; Dinophyceae_X; Dinophyceae_XX; Warnowia; Warnowia_sp.;
565	540	Alveolates-Dinoflagellates	Noctiluca	Eukaryota; Alveolata; Dinophyta; Dinophyceae; Dinophyceae_X; Noctilucales; Noctiluca; Noctiluca_sp.;
3008	510	Alveolates-Dinoflagellates	Gonyaulax	Eukaryota; Alveolata; Dinophyta; Dinophyceae; Dinophyceae_X; Dinophyceae_XX; Gonyaulax; Gonyaulax_polygramma;
4082	412	Alveolates-Dinoflagellates	Symbiodinium	Eukaryota; Alveolata; Dinophyta; Dinophyceae; Suessiales; Suessiales_X; Symbiodinium; Symbiodinium_sp.;
1909	371	Alveolates-Dinoflagellates	Neoceratium	Eukaryota; Alveolata; Dinophyta; Dinophyceae; Dinophyceae_X; Dinophyceae_XX; Neoceratium; Neoceratium_concilians;
728	313	Alveolates-Dinoflagellates	Kofoidinium	Eukaryota; Alveolata; Dinophyta; Dinophyceae; Dinophyceae_X; Dinophyceae_XX; Kofoidinium; Kofoidinium_pavillardii;
15773	293	Alveolates-Dinoflagellates	Dinophysaceae_Oxyphysaceae	Eukaryota; Alveolata; Dinophyta; Dinophyceae; Dinophysiales; Dinophysaceae_Oxyphysaceae; Dinophysaceae_Oxyphysaceae_X; Dinophysaceae_Oxyphysaceae_X_sp.;
804	269	Alveolates-Dinoflagellates	Gyrodinium	Eukaryota; Alveolata; Dinophyta; Dinophyceae; Dinophyceae_X; Dinophyceae_XX; Gyrodinium; Gyrodinium_spirale;
388	234	Alveolates-Dinoflagellates	Kofoidinium	Eukaryota; Alveolata; Dinophyta; Dinophyceae; Dinophyceae_X; Dinophyceae_XX; Kofoidinium; Kofoidinium_sp.;
1432	222	Alveolates-Dinoflagellates	Karlodinium	Eukaryota; Alveolata; Dinophyta; Dinophyceae; Suessiales; Suessiales_X; Karlodinium; Karlodinium_sp.;
214	203	Alveolates-Dinoflagellates	Amphidinium	Eukaryota; Alveolata; Dinophyta; Dinophyceae; Dinophyceae_X; Dinophyceae_XX; Amphidinium; Amphidinium_semilunatum;
588	193	Alveolates-Dinoflagellates	Scrippsiella	Eukaryota; Alveolata; Dinophyta; Dinophyceae; Dinophyceae_X; Dinophyceae_XX; Scrippsiella; Scrippsiella_trochoidea;
430	167	Alveolates-Dinoflagellates	Suessiales	Eukaryota; Alveolata; Dinophyta; Dinophyceae; Suessiales; Suessiales_X; Suessiales_XX; Suessiales_XX_sp.;
1526	158	Alveolates-Dinoflagellates	Dinophysis	Eukaryota; Alveolata; Dinophyta; Dinophyceae; Dinophysiales; Dinophysaceae_Oxyphysaceae; Dinophysis; Dinophysis_hastata;
926	149	Alveolates-Dinoflagellates	Gyrodinium	Eukaryota; Alveolata; Dinophyta; Dinophyceae; Dinophyceae_X; Dinophyceae_XX; Gyrodinium; Gyrodinium_fusiforme;
8005	135	Alveolates-Dinoflagellates	Blastodinium	Eukaryota; Alveolata; Dinophyta; Dinophyceae; Dinophyceae_X; Dinophyceae_XX; Blastodinium; Blastodinium_galatheanum;
240	99	Alveolates-Dinoflagellates	Gymnodinium	Eukaryota; Alveolata; Dinophyta; Dinophyceae; Dinophyceae_X; Dinophyceae_XX; Gymnodinium; Gymnodinium_catenatum;
212	96	Alveolates-Dinoflagellates	Karlodinium	Eukaryota; Alveolata; Dinophyta; Dinophyceae; Suessiales; Suessiales_X; Karlodinium; Karlodinium_micrum;
40	92	Alveolates-Dinoflagellates	Protoperidinium	Eukaryota; Alveolata; Dinophyta; Dinophyceae; Dinophyceae_X; Dinophyceae_XX; Protoperidinium; Protoperidinium_pellucidum;
360	88	Alveolates-Dinoflagellates	Heterocapsa	Eukaryota; Alveolata; Dinophyta; Dinophyceae; Dinophyceae_X; Dinophyceae_XX; Heterocapsa; Heterocapsa_pygmea;
190	84	Alveolates-Dinoflagellates	Gyrodinium	Eukaryota; Alveolata; Dinophyta; Dinophyceae; Dinophyceae_X; Dinophyceae_XX; Gyrodinium; Gyrodinium_dominans;
211	75	Alveolates-Dinoflagellates	Dinophysis	Eukaryota; Alveolata; Dinophyta; Dinophyceae; Dinophysiales; Dinophysaceae_Oxyphysaceae; Dinophysis; Dinophysis_acuta;
127	72	Alveolates-Dinoflagellates	DinophytaX	Eukaryota; Alveolata; Dinophyta; Dinophyta_X; Dinophyta_XX; Dinophyta_XXX; Dinophyta_XXXX; Dinophyta_XXXX_sp.;
157	70	Alveolates-Dinoflagellates	Erythropsidinium	Eukaryota; Alveolata; Dinophyta; Dinophyceae; Dinophyceae_X; Dinophyceae_XX; Erythropsidinium; Erythropsidinium_agile;
295	66	Alveolates-Dinoflagellates	Neoceratium	Eukaryota; Alveolata; Dinophyta; Dinophyceae; Dinophyceae_X; Dinophyceae_XX; Neoceratium; Neoceratium_fusus;
127	63	Alveolates-Dinoflagellates	Prorocentrum	Eukaryota; Alveolata; Dinophyta; Dinophyceae; Dinophyceae_X; Dinophyceae_XX; Prorocentrum; Prorocentrum_pseudopanamense;
273	61	Alveolates-Dinoflagellates	Prorocentrum	Eukaryota; Alveolata; Dinophyta; Dinophyceae; Dinophyceae_X; Dinophyceae_XX; Prorocentrum; Prorocentrum_micans;
47	59	Alveolates-Dinoflagellates	Peridinium	Eukaryota; Alveolata; Dinophyta; Dinophyceae; Dinophyceae_X; Dinophyceae_XX; Peridinium; Peridinium_inconspicuum;
102	51	Alveolates-Dinoflagellates	Pentapharsodinium	Eukaryota; Alveolata; Dinophyta; Dinophyceae; Dinophyceae_X; Dinophyceae_XX; Pentapharsodinium; Pentapharsodinium_sp.;
125	43	Alveolates-Dinoflagellates	Heterocapsa	Eukaryota; Alveolata; Dinophyta; Dinophyceae; Dinophyceae_X; Dinophyceae_XX; Heterocapsa; Heterocapsa_nei/rotundata;
272	43	Alveolates-Dinoflagellates	Thecate	Eukaryota; Alveolata; Dinophyta; Dinophyceae; Dinophyceae_X; Dinophyceae_XX; Thecate; Thecate_sp.;
281	41	Alveolates-Dinoflagellates	Lepidodinium	Eukaryota; Alveolata; Dinophyta; Dinophyceae; Dinophyceae_X; Dinophyceae_XX; Lepidodinium; Lepidodinium_chlorophorum;
123	41	Alveolates-Dinoflagellates	Protoceratium	Eukaryota; Alveolata; Dinophyta; Dinophyceae; Dinophyceae_X; Dinophyceae_XX; Protoceratium; Protoceratium_reticulatum;
69	39	Alveolates-Dinoflagellates	Heterocapsa	Eukaryota; Alveolata; Dinophyta; Dinophyceae; Dinophyceae_X; Dinophyceae_XX; Heterocapsa; Heterocapsa_sp.;
107	38	Alveolates-Dinoflagellates	Heterodinium	Eukaryota; Alveolata; Dinophyta; Dinophyceae; Dinophyceae_X; Dinophyceae_XX; Heterodinium; Heterodinium_milneri;
74	32	Alveolates-Dinoflagellates	Dinophysis	Eukaryota; Alveolata; Dinophyta; Dinophyceae; Dinophysiales; Dinophysaceae_Oxyphysaceae; Dinophysis; Dinophysis_fortii;
82	31	Alveolates-Dinoflagellates	Apicoporus	Eukaryota; Alveolata; Dinophyta; Dinophyceae; Dinophyceae_X; Dinophyceae_XX; Apicoporus; Apicoporus_glaber;
372	28	Alveolates-Dinoflagellates	Alexandrium	Eukaryota; Alveolata; Dinophyta; Dinophyceae; Dinophyceae_X; Dinophyceae_XX; Alexandrium; Alexandrium_andersonii;
7836	28	Alveolates-Dinoflagellates	Blastodinium	Eukaryota; Alveolata; Dinophyta; Dinophyceae; Dinophyceae_X; Dinophyceae_XX; Blastodinium; Blastodinium_spinulosum;
11	25	Alveolates-Dinoflagellates	Prorocentrum	Eukaryota; Alveolata; Dinophyta; Dinophyceae; Dinophyceae_X; Dinophyceae_XX; Prorocentrum; Prorocentrum_donghaiense;
31	23	Alveolates-Dinoflagellates	Gymnodinium	Eukaryota; Alveolata; Dinophyta; Dinophyceae; Dinophyceae_X; Dinophyceae_XX; Gymnodinium; Gymnodinium_impudicum;
38	23	Alveolates-Dinoflagellates	Gyrodinium	Eukaryota; Alveolata; Dinophyta; Dinophyceae; Dinophyceae_X; Dinophyceae_XX; Gyrodinium; Gyrodinium_rubrum;
24	20	Alveolates-Dinoflagellates	Peridiniopsis	Eukaryota; Alveolata; Dinophyta; Dinophyceae; Dinophyceae_X; Dinophyceae_XX; Peridiniopsis; Peridiniopsis_penardii;
58	18	Alveolates-Dinoflagellates	Pheopolykrikos	Eukaryota; Alveolata; Dinophyta; Dinophyceae; Dinophyceae_X; Dinophyceae_XX; Pheopolykrikos; Pheopolykrikos_hartmannii;
3956	16	Alveolates-Dinoflagellates	Blastodinium	Eukaryota; Alveolata; Dinophyta; Dinophyceae; Dinophyceae_X; Dinophyceae_XX; Blastodinium; Blastodinium_pruvoti;
58	16	Alveolates-Dinoflagellates	Pentapharsodinium	Eukaryota; Alveolata; Dinophyta; Dinophyceae; Dinophyceae_X; Dinophyceae_XX; Pentapharsodinium; Pentapharsodinium_tyrrhenicum;
150	15	Alveolates-Dinoflagellates	Woloszynskia	Eukaryota; Alveolata; Dinophyta; Dinophyceae; Suessiales; Suessiales_X; Woloszynskia; Woloszynskia_sp.;
28	14	Alveolates-Dinoflagellates	Neoceratium	Eukaryota; Alveolata; Dinophyta; Dinophyceae; Dinophyceae_X; Dinophyceae_XX; Neoceratium; Neoceratium_horridum;
176	14	Alveolates-Dinoflagellates	Phalacroma	Eukaryota; Alveolata; Dinophyta; Dinophyceae; Dinophysiales; Dinophysaceae_Oxyphysaceae; Phalacroma; Phalacroma_rapa;
164	14	Alveolates-Dinoflagellates	Phalacroma	Eukaryota; Alveolata; Dinophyta; Dinophyceae; Dinophysiales; Dinophysaceae_Oxyphysaceae; Phalacroma; Phalacroma_parvulum;
25	13	Alveolates-Dinoflagellates	Gymnodinium	Eukaryota; Alveolata; Dinophyta; Dinophyceae; Dinophyceae_X; Dinophyceae_XX; Gymnodinium; Gymnodinium_dorsalisulcum;
24	11	Alveolates-Dinoflagellates	Akashiwo	Eukaryota; Alveolata; Dinophyta; Dinophyceae; Dinophyceae_X; Dinophyceae_XX; Akashiwo; Akashiwo_sanguinea;
190	11	Alveolates-Dinoflagellates	Blastodinium	Eukaryota; Alveolata; Dinophyta; Dinophyceae; Dinophyceae_X; Dinophyceae_XX; Blastodinium; Blastodinium_mangini;
65	11	Alveolates-Dinoflagellates	Dinophysis	Eukaryota; Alveolata; Dinophyta; Dinophyceae; Dinophysiales; Dinophysaceae_Oxyphysaceae; Dinophysis; Dinophysis_acutissima;
73	10	Alveolates-Dinoflagellates	Lepidodinium	Eukaryota; Alveolata; Dinophyta; Dinophyceae; Dinophyceae_X; Dinophyceae_XX; Lepidodinium; Lepidodinium_viride;
52	10	Alveolates-Dinoflagellates	Pyrophacus	Eukaryota; Alveolata; Dinophyta; Dinophyceae; Dinophyceae_X; Dinophyceae_XX; Pyrophacus; Pyrophacus_steinii;
86	9	Alveolates-Dinoflagellates	Cachonina	Eukaryota; Alveolata; Dinophyta; Dinophyceae; Dinophyceae_X; Dinophyceae_XX; Cachonina; Cachonina_hallii;
468	8	Alveolates-Dinoflagellates	Alexandrium	Eukaryota; Alveolata; Dinophyta; Dinophyceae; Dinophyceae_X; Dinophyceae_XX; Alexandrium; Alexandrium_fundyense-GroupI;
26	8	Alveolates-Dinoflagellates	Amphisolenia	Eukaryota; Alveolata; Dinophyta; Dinophyceae; Dinophysiales; Amphisoleniaceae; Amphisolenia; Amphisolenia_bidentata;
9	8	Alveolates-Dinoflagellates	Heterocapsa	Eukaryota; Alveolata; Dinophyta; Dinophyceae; Dinophyceae_X; Dinophyceae_XX; Heterocapsa; Heterocapsa_triquetra;
264	8	Alveolates-Dinoflagellates	Neoceratium	Eukaryota; Alveolata; Dinophyta; Dinophyceae; Dinophyceae_X; Dinophyceae_XX; Neoceratium; Neoceratium_gravidum;
9	8	Alveolates-Dinoflagellates	Prorocentrum	Eukaryota; Alveolata; Dinophyta; Dinophyceae; Dinophyceae_X; Dinophyceae_XX; Prorocentrum; Prorocentrum_shikokuense;
74	7	Alveolates-Dinoflagellates	Chytriodinium	Eukaryota; Alveolata; Dinophyta; Dinophyceae; Dinophyceae_X; Dinophyceae_XX; Chytriodinium; Chytriodinium_affine;
3	7	Alveolates-Dinoflagellates	Polarella	Eukaryota; Alveolata; Dinophyta; Dinophyceae; Suessiales; Suessiales_X; Polarella; Polarella_glacialis;
24	6	Alveolates-Dinoflagellates	Luciella	Eukaryota; Alveolata; Dinophyta; Dinophyceae; Dinophyceae_X; Pfiesteriaceae; Luciella; Luciella_sp.;
14	5	Alveolates-Dinoflagellates	Alexandrium	Eukaryota; Alveolata; Dinophyta; Dinophyceae; Dinophyceae_X; Dinophyceae_XX; Alexandrium; Alexandrium_pseudogoniaulax;
19	5	Alveolates-Dinoflagellates	Karenia	Eukaryota; Alveolata; Dinophyta; Dinophyceae; Dinophyceae_X; Dinophyceae_XX; Karenia; Karenia_mikimotoi;
10	4	Alveolates-Dinoflagellates	Archaeperidinium	Eukaryota; Alveolata; Dinophyta; Dinophyceae; Dinophyceae_X; Dinophyceae_XX; Archaeperidinium; Archaeperidinium_minutum;
177	4	Alveolates-Dinoflagellates	Blastodinium	Eukaryota; Alveolata; Dinophyta; Dinophyceae; Dinophyceae_X; Dinophyceae_XX; Blastodinium; Blastodinium_sp.;
1	3	Alveolates-Dinoflagellates	Gyrodinium	Eukaryota; Alveolata; Dinophyta; Dinophyceae; Dinophyceae_X; Dinophyceae_XX; Gyrodinium; Gyrodinium_helveticum;
9	3	Alveolates-Dinoflagellates	Lessardia	Eukaryota; Alveolata; Dinophyta; Dinophyceae; Dinophyceae_X; Dinophyceae_XX; Lessardia; Lessardia_elongata;
7	3	Alveolates-Dinoflagellates	Proterythropsis	Eukaryota; Alveolata; Dinophyta; Dinophyceae; Dinophyceae_X; Dinophyceae_XX; Proterythropsis; Proterythropsis_sp.;
63	3	Alveolates-Dinoflagellates	Protoperidinium	Eukaryota; Alveolata; Dinophyta; Dinophyceae; Dinophyceae_X; Dinophyceae_XX; Protoperidinium; Protoperidinium_tricingulatum;
12	3	Alveolates-Dinoflagellates	Protoperidinium	Eukaryota; Alveolata; Dinophyta; Dinophyceae; Dinophyceae_X; Dinophyceae_XX; Protoperidinium; Protoperidinium_elegans;
4	3	Alveolates-Dinoflagellates	Woloszynskia	Eukaryota; Alveolata; Dinophyta; Dinophyceae; Suessiales; Suessiales_X; Woloszynskia; Woloszynskia_pascheri;
521	2	Alveolates-Dinoflagellates	Blastodinium	Eukaryota; Alveolata; Dinophyta; Dinophyceae; Dinophyceae_X; Dinophyceae_XX; Blastodinium; Blastodinium_inornatum;
83	2	Alveolates-Dinoflagellates	Blastodinium	Eukaryota; Alveolata; Dinophyta; Dinophyceae; Dinophyceae_X; Dinophyceae_XX; Blastodinium; Blastodinium_navicula;
325	2	Alveolates-Dinoflagellates	Dinophysis	Eukaryota; Alveolata; Dinophyta; Dinophyceae; Dinophysiales; Dinophysaceae_Oxyphysaceae; Dinophysis; Dinophysis_pusilla;
4	2	Alveolates-Dinoflagellates	Fragilidium	Eukaryota; Alveolata; Dinophyta; Dinophyceae; Dinophyceae_X; Dinophyceae_XX; Fragilidium; Fragilidium_sp.;
0	2	Alveolates-Dinoflagellates	Heterocapsa	Eukaryota; Alveolata; Dinophyta; Dinophyceae; Dinophyceae_X; Dinophyceae_XX; Heterocapsa; Heterocapsa_pygmaea;
4	2	Alveolates-Dinoflagellates	Karenia	Eukaryota; Alveolata; Dinophyta; Dinophyceae; Dinophyceae_X; Dinophyceae_XX; Karenia; Karenia_brevis;
2	2	Alveolates-Dinoflagellates	Paulsenella	Eukaryota; Alveolata; Dinophyta; Dinophyceae; Dinophyceae_X; Pfiesteriaceae; Paulsenella; Paulsenella_vonstoschii;
18	2	Alveolates-Dinoflagellates	Scrippsiella	Eukaryota; Alveolata; Dinophyta; Dinophyceae; Dinophyceae_X; Dinophyceae_XX; Scrippsiella; Scrippsiella_sp.;
7	1	Alveolates-Dinoflagellates	Amphidinium	Eukaryota; Alveolata; Dinophyta; Dinophyceae; Dinophyceae_X; Dinophyceae_XX; Amphidinium; Amphidinium_longum;
3	1	Alveolates-Dinoflagellates	Azadinium	Eukaryota; Alveolata; Dinophyta; Dinophyceae; Dinophyceae_X; Dinophyceae_XX; Azadinium; Azadinium_sp.;
1	1	Alveolates-Dinoflagellates	Blepharocysta	Eukaryota; Alveolata; Dinophyta; Dinophyceae; Dinophyceae_X; Dinophyceae_XX; Blepharocysta; Blepharocysta_sp.;
0	1	Alveolates-Dinoflagellates	Borghiella	Eukaryota; Alveolata; Dinophyta; Dinophyceae; Suessiales; Suessiales_X; Borghiella; Borghiella_tenuissima;
36	1	Alveolates-Dinoflagellates	Ceratocorys	Eukaryota; Alveolata; Dinophyta; Dinophyceae; Dinophyceae_X; Dinophyceae_XX; Ceratocorys; Ceratocorys_horrida;
0	1	Alveolates-Dinoflagellates	Cochlodinium	Eukaryota; Alveolata; Dinophyta; Dinophyceae; Dinophyceae_X; Dinophyceae_XX; Cochlodinium; Cochlodinium_geminatum;
3	1	Alveolates-Dinoflagellates	Dinophysis	Eukaryota; Alveolata; Dinophyta; Dinophyceae; Dinophysiales; Dinophysaceae_Oxyphysaceae; Dinophysis; Dinophysis_monacantha;
1	1	Alveolates-Dinoflagellates	Glenodinium	Eukaryota; Alveolata; Dinophyta; Dinophyceae; Dinophyceae_X; Dinophyceae_XX; Glenodinium; Glenodinium_inaequale;
15	1	Alveolates-Dinoflagellates	Gymnodinium	Eukaryota; Alveolata; Dinophyta; Dinophyceae; Dinophyceae_X; Dinophyceae_XX; Gymnodinium; Gymnodinium_aureolum;
2	1	Alveolates-Dinoflagellates	Gymnodinium	Eukaryota; Alveolata; Dinophyta; Dinophyceae; Dinophyceae_X; Dinophyceae_XX; Gymnodinium; Gymnodinium_nolleri;
2	1	Alveolates-Dinoflagellates	Neoceratium	Eukaryota; Alveolata; Dinophyta; Dinophyceae; Dinophyceae_X; Dinophyceae_XX; Neoceratium; Neoceratium_limulus;
2	1	Alveolates-Dinoflagellates	Pelagodinium	Eukaryota; Alveolata; Dinophyta; Dinophyceae; Suessiales; Suessiales_X; Pelagodinium; Pelagodinium_beii;
5	1	Alveolates-Dinoflagellates	Pfiesteria	Eukaryota; Alveolata; Dinophyta; Dinophyceae; Dinophyceae_X; Pfiesteriaceae; Pfiesteria; Pfiesteria_piscicida;
19	1	Alveolates-Dinoflagellates	Posoniella	Eukaryota; Alveolata; Dinophyta; Dinophyceae; Dinophyceae_X; Dinophyceae_XX; Posoniella; Posoniella_tricarinelloides;
5	1	Alveolates-Dinoflagellates	Prorocentrum	Eukaryota; Alveolata; Dinophyta; Dinophyceae; Dinophyceae_X; Dinophyceae_XX; Prorocentrum; Prorocentrum_minimum;
1	1	Alveolates-Dinoflagellates	Protodinium	Eukaryota; Alveolata; Dinophyta; Dinophyceae; Suessiales; Suessiales_X; Protodinium; Protodinium_simplex;
0	1	Alveolates-Dinoflagellates	Roscoffia	Eukaryota; Alveolata; Dinophyta; Dinophyceae; Dinophyceae_X; Dinophyceae_XX; Roscoffia; Roscoffia_capitata;
2	1	Alveolates-Dinoflagellates	Stoeckeria	Eukaryota; Alveolata; Dinophyta; Dinophyceae; Dinophyceae_X; Pfiesteriaceae; Stoeckeria; Stoeckeria_sp.;
4	1	Alveolates-Dinoflagellates	Triposolenia	Eukaryota; Alveolata; Dinophyta; Dinophyceae; Dinophysiales; Amphisoleniaceae; Triposolenia; Triposolenia_bicornis;
16	0	Alveolates-Dinoflagellates	Alexandrium	Eukaryota; Alveolata; Dinophyta; Dinophyceae; Dinophyceae_X; Dinophyceae_XX; Alexandrium; Alexandrium_minutum;
9	0	Alveolates-Dinoflagellates	Alexandrium	Eukaryota; Alveolata; Dinophyta; Dinophyceae; Dinophyceae_X; Dinophyceae_XX; Alexandrium; Alexandrium_tamarense-GroupIII-IIB;
1	0	Alveolates-Dinoflagellates	Alexandrium	Eukaryota; Alveolata; Dinophyta; Dinophyceae; Dinophyceae_X; Dinophyceae_XX; Alexandrium; Alexandrium_affine;
10	0	Alveolates-Dinoflagellates	Amphidinium	Eukaryota; Alveolata; Dinophyta; Dinophyceae; Dinophyceae_X; Dinophyceae_XX; Amphidinium; Amphidinium_herdmanii;
3	0	Alveolates-Dinoflagellates	Amphidoma	Eukaryota; Alveolata; Dinophyta; Dinophyceae; Dinophyceae_X; Dinophyceae_XX; Amphidoma; Amphidoma_languida;
16	0	Alveolates-Dinoflagellates	Apicoporus	Eukaryota; Alveolata; Dinophyta; Dinophyceae; Dinophyceae_X; Dinophyceae_XX; Apicoporus; Apicoporus_parvidiaboli;
7	0	Alveolates-Dinoflagellates	Archaeperidinium	Eukaryota; Alveolata; Dinophyta; Dinophyceae; Dinophyceae_X; Dinophyceae_XX; Archaeperidinium; Archaeperidinium_sp.;
3	0	Alveolates-Dinoflagellates	Azadinium	Eukaryota; Alveolata; Dinophyta; Dinophyceae; Dinophyceae_X; Dinophyceae_XX; Azadinium; Azadinium_caudatum;
1	0	Alveolates-Dinoflagellates	Bispinodinium	Eukaryota; Alveolata; Dinophyta; Dinophyceae; Dinophyceae_X; Dinophyceae_XX; Bispinodinium; Bispinodinium_angelaceum;
3	0	Alveolates-Dinoflagellates	Blastodinium	Eukaryota; Alveolata; Dinophyta; Dinophyceae; Dinophyceae_X; Dinophyceae_XX; Blastodinium; Blastodinium_contortum;
3	0	Alveolates-Dinoflagellates	Ceratium	Eukaryota; Alveolata; Dinophyta; Dinophyceae; Dinophyceae_X; Dinophyceae_XX; Ceratium; Ceratium_sp.;
1	0	Alveolates-Dinoflagellates	Cryptoperidiniopsis	Eukaryota; Alveolata; Dinophyta; Dinophyceae; Dinophyceae_X; Pfiesteriaceae; Cryptoperidiniopsis; Cryptoperidiniopsis_brodyi;
13	0	Alveolates-Dinoflagellates	Dinophysis	Eukaryota; Alveolata; Dinophyta; Dinophyceae; Dinophysiales; Dinophysaceae_Oxyphysaceae; Dinophysis; Dinophysis_acuminata;
1	0	Alveolates-Dinoflagellates	Dissodinium	Eukaryota; Alveolata; Dinophyta; Dinophyceae; Dinophyceae_X; Dinophyceae_XX; Dissodinium; Dissodinium_pseudolunula;
1	0	Alveolates-Dinoflagellates	Gloeodinium	Eukaryota; Alveolata; Dinophyta; Dinophyceae; Dinophyceae_X; Dinophyceae_XX; Gloeodinium; Gloeodinium_montanum;
1	0	Alveolates-Dinoflagellates	Gloeodinium	Eukaryota; Alveolata; Dinophyta; Dinophyceae; Dinophyceae_X; Dinophyceae_XX; Gloeodinium; Gloeodinium_viscum;
11	0	Alveolates-Dinoflagellates	Gonyaulax	Eukaryota; Alveolata; Dinophyta; Dinophyceae; Dinophyceae_X; Dinophyceae_XX; Gonyaulax; Gonyaulax_fragilis;
4	0	Alveolates-Dinoflagellates	Gymnodinium	Eukaryota; Alveolata; Dinophyta; Dinophyceae; Dinophyceae_X; Dinophyceae_XX; Gymnodinium; Gymnodinium_microreticulatum;
116	0	Alveolates-Dinoflagellates	Herdmania	Eukaryota; Alveolata; Dinophyta; Dinophyceae; Dinophyceae_X; Dinophyceae_XX; Herdmania; Herdmania_litoralis;
2	0	Alveolates-Dinoflagellates	Karenia	Eukaryota; Alveolata; Dinophyta; Dinophyceae; Dinophyceae_X; Dinophyceae_XX; Karenia; Karenia_bidigitata;
2	0	Alveolates-Dinoflagellates	Karenia	Eukaryota; Alveolata; Dinophyta; Dinophyceae; Dinophyceae_X; Dinophyceae_XX; Karenia; Karenia_papilionacea;
1	0	Alveolates-Dinoflagellates	Karenia	Eukaryota; Alveolata; Dinophyta; Dinophyceae; Dinophyceae_X; Dinophyceae_XX; Karenia; Karenia_capitatum;
6	0	Alveolates-Dinoflagellates	Lepidodinium	Eukaryota; Alveolata; Dinophyta; Dinophyceae; Dinophyceae_X; Dinophyceae_XX; Lepidodinium; Lepidodinium_sp.;
20	0	Alveolates-Dinoflagellates	Lingulodinium	Eukaryota; Alveolata; Dinophyta; Dinophyceae; Dinophyceae_X; Dinophyceae_XX; Lingulodinium; Lingulodinium_polyedrum;
2	0	Alveolates-Dinoflagellates	Nematodinium	Eukaryota; Alveolata; Dinophyta; Dinophyceae; Dinophyceae_X; Dinophyceae_XX; Nematodinium; Nematodinium_sp.;
8	0	Alveolates-Dinoflagellates	Neoceratium	Eukaryota; Alveolata; Dinophyta; Dinophyceae; Dinophyceae_X; Dinophyceae_XX; Neoceratium; Neoceratium_candelabrum;
4	0	Alveolates-Dinoflagellates	Neoceratium	Eukaryota; Alveolata; Dinophyta; Dinophyceae; Dinophyceae_X; Dinophyceae_XX; Neoceratium; Neoceratium_contrarium;
1	0	Alveolates-Dinoflagellates	Neoceratium	Eukaryota; Alveolata; Dinophyta; Dinophyceae; Dinophyceae_X; Dinophyceae_XX; Neoceratium; Neoceratium_digitatum;
0	0	Alveolates-Dinoflagellates	Neoceratium	Eukaryota; Alveolata; Dinophyta; Dinophyceae; Dinophyceae_X; Dinophyceae_XX; Neoceratium; Neoceratium_furca;
0	0	Alveolates-Dinoflagellates	Neoceratium	Eukaryota; Alveolata; Dinophyta; Dinophyceae; Dinophyceae_X; Dinophyceae_XX; Neoceratium; Neoceratium_hexacanthum;
0	0	Alveolates-Dinoflagellates	Neoceratium	Eukaryota; Alveolata; Dinophyta; Dinophyceae; Dinophyceae_X; Dinophyceae_XX; Neoceratium; Neoceratium_longipes;
0	0	Alveolates-Dinoflagellates	Neoceratium	Eukaryota; Alveolata; Dinophyta; Dinophyceae; Dinophyceae_X; Dinophyceae_XX; Neoceratium; Neoceratium_pentagonum;
44	0	Alveolates-Dinoflagellates	Noctiluca	Eukaryota; Alveolata; Dinophyta; Dinophyceae; Dinophyceae_X; Noctilucales; Noctiluca; Noctiluca_scintillans;
0	0	Alveolates-Dinoflagellates	Peridiniopsis	Eukaryota; Alveolata; Dinophyta; Dinophyceae; Dinophyceae_X; Dinophyceae_XX; Peridiniopsis; Peridiniopsis_kevei;
0	0	Alveolates-Dinoflagellates	Peridiniopsis	Eukaryota; Alveolata; Dinophyta; Dinophyceae; Dinophyceae_X; Dinophyceae_XX; Peridiniopsis; Peridiniopsis_polonicum;
0	0	Alveolates-Dinoflagellates	Peridinium	Eukaryota; Alveolata; Dinophyta; Dinophyceae; Dinophyceae_X; Dinophyceae_XX; Peridinium; Peridinium_palatinum;
7	0	Alveolates-Dinoflagellates	Phalacroma	Eukaryota; Alveolata; Dinophyta; Dinophyceae; Dinophysiales; Dinophysaceae_Oxyphysaceae; Phalacroma; Phalacroma_favus;
7	0	Alveolates-Dinoflagellates	Phalacroma	Eukaryota; Alveolata; Dinophyta; Dinophyceae; Dinophysiales; Dinophysaceae_Oxyphysaceae; Phalacroma; Phalacroma_sp.;
1	0	Alveolates-Dinoflagellates	Phalacroma	Eukaryota; Alveolata; Dinophyta; Dinophyceae; Dinophysiales; Dinophysaceae_Oxyphysaceae; Phalacroma; Phalacroma_rotundatum;
3	0	Alveolates-Dinoflagellates	Polykrikos	Eukaryota; Alveolata; Dinophyta; Dinophyceae; Dinophyceae_X; Dinophyceae_XX; Polykrikos; Polykrikos_tanit;
3	0	Alveolates-Dinoflagellates	Prorocentrum	Eukaryota; Alveolata; Dinophyta; Dinophyceae; Dinophyceae_X; Dinophyceae_XX; Prorocentrum; Prorocentrum_glenanicum;
2	0	Alveolates-Dinoflagellates	Prorocentrum	Eukaryota; Alveolata; Dinophyta; Dinophyceae; Dinophyceae_X; Dinophyceae_XX; Prorocentrum; Prorocentrum_dentatum;
1	0	Alveolates-Dinoflagellates	Prorocentrum	Eukaryota; Alveolata; Dinophyta; Dinophyceae; Dinophyceae_X; Dinophyceae_XX; Prorocentrum; Prorocentrum_panamensis;
29	0	Alveolates-Dinoflagellates	Protoperidinium	Eukaryota; Alveolata; Dinophyta; Dinophyceae; Dinophyceae_X; Dinophyceae_XX; Protoperidinium; Protoperidinium_conicum;
14	0	Alveolates-Dinoflagellates	Protoperidinium	Eukaryota; Alveolata; Dinophyta; Dinophyceae; Dinophyceae_X; Dinophyceae_XX; Protoperidinium; Protoperidinium_americanum;
1	0	Alveolates-Dinoflagellates	Protoperidinium	Eukaryota; Alveolata; Dinophyta; Dinophyceae; Dinophyceae_X; Dinophyceae_XX; Protoperidinium; Protoperidinium_monovelum;
5	0	Alveolates-Dinoflagellates	Scrippsiella	Eukaryota; Alveolata; Dinophyta; Dinophyceae; Dinophyceae_X; Dinophyceae_XX; Scrippsiella; Scrippsiella_nutricula;
0	0	Alveolates-Dinoflagellates	Sinophysis	Eukaryota; Alveolata; Dinophyta; Dinophyceae; Dinophyceae_X; Dinophyceae_XX; Sinophysis; Sinophysis_grandis;
1	0	Alveolates-Dinoflagellates	Takayama	Eukaryota; Alveolata; Dinophyta; Dinophyceae; Dinophyceae_X; Dinophyceae_XX; Takayama; Takayama_pulchellum;
3	0	Alveolates-Dinoflagellates	Theleodinium	Eukaryota; Alveolata; Dinophyta; Dinophyceae; Dinophyceae_X; Dinophyceae_XX; Theleodinium; Theleodinium_calcisporum;
1	0	Alveolates-Dinoflagellates	Thoracosphaera	Eukaryota; Alveolata; Dinophyta; Dinophyceae; Dinophyceae_X; Dinophyceae_XX; Thoracosphaera; Thoracosphaera_heimii;
3	0	Alveolates-Dinoflagellates	Woloszynskia	Eukaryota; Alveolata; Dinophyta; Dinophyceae; Suessiales; Suessiales_X; Woloszynskia; Woloszynskia_cincta;
4	32	Alveolates-Other	Apicomplexa	Eukaryota; Alveolata; Apicomplexa; Apicomplexa_X; Gregarines; Cephaloidophoroidea; Cephaloidophoroidea_X; Cephaloidophoroidea_X_sp.;
0	2	Alveolates-Other	Apicomplexa	Eukaryota; Alveolata; Apicomplexa; Apicomplexa_X; Coccidia; Hepatozoon-group; Hepatozoon; Hepatozoon_sp.;
1	1	Alveolates-Other	Apicomplexa	Eukaryota; Alveolata; Apicomplexa; Apicomplexa_X; Coccidia; Eimeriidae; Eimeria; Eimeria_cylindrica;
4	0	Alveolates-Other	Apicomplexa	Eukaryota; Alveolata; Apicomplexa; Apicomplexa_X; Coccidia; Eucoccidiorida; Cryptosporidium; Cryptosporidium_baileyi;
5199	16062	Alveolates-Syndiniales	Dino-Group-III	Eukaryota; Alveolata; Dinophyta; Syndiniales; Dino-Group-III; Dino-Group-III_X; Dino-Group-III_XX; Dino-Group-III_XX_sp.;
14213	12495	Alveolates-Syndiniales	Dino-Group-II	Eukaryota; Alveolata; Dinophyta; Syndiniales; Dino-Group-II; Dino-Group-II-Clade-10-and-11; Dino-Group-II-Clade-10-and-11_X; Dino-Group-II-Clade-10-and-11_X_sp.;
4335	3254	Alveolates-Syndiniales	Dino-Group-II	Eukaryota; Alveolata; Dinophyta; Syndiniales; Dino-Group-II; Dino-Group-II-Clade-16; Dino-Group-II-Clade-16_X; Dino-Group-II-Clade-16_X_sp.;
4620	2309	Alveolates-Syndiniales	Dino-Group-II	Eukaryota; Alveolata; Dinophyta; Syndiniales; Dino-Group-II; Dino-Group-II-Clade-1; Dino-Group-II-Clade-1_X; Dino-Group-II-Clade-1_X_sp.;
21428	1633	Alveolates-Syndiniales	Dino-Group-I	Eukaryota; Alveolata; Dinophyta; Syndiniales; Dino-Group-I; Dino-Group-I-Clade-5; Dino-Group-I-Clade-5_X; Dino-Group-I-Clade-5_X_sp.;
1278	1356	Alveolates-Syndiniales	Dino-Group-II	Eukaryota; Alveolata; Dinophyta; Syndiniales; Dino-Group-II; Dino-Group-II-Clade-5; Dino-Group-II-Clade-5_X; Dino-Group-II-Clade-5_X_sp.;
2020	1338	Alveolates-Syndiniales	Dino-Group-II	Eukaryota; Alveolata; Dinophyta; Syndiniales; Dino-Group-II; Dino-Group-II-Clade-7; Dino-Group-II-Clade-7_X; Dino-Group-II-Clade-7_X_sp.;
14101	1275	Alveolates-Syndiniales	Dino-Group-I	Eukaryota; Alveolata; Dinophyta; Syndiniales; Dino-Group-I; Dino-Group-I-Clade-1; Dino-Group-I-Clade-1_X; Dino-Group-I-Clade-1_X_sp.;
4718	1269	Alveolates-Syndiniales	Dino-Group-I	Eukaryota; Alveolata; Dinophyta; Syndiniales; Dino-Group-I; Dino-Group-I-Clade-6; Dino-Group-I-Clade-6_X; Dino-Group-I-Clade-6_X_sp.;
4652	1201	Alveolates-Syndiniales	Dino-Group-II	Eukaryota; Alveolata; Dinophyta; Syndiniales; Dino-Group-II; Dino-Group-II-Clade-6; Dino-Group-II-Clade-6_X; Dino-Group-II-Clade-6_X_sp.;
2818	704	Alveolates-Syndiniales	Dino-Group-II	Eukaryota; Alveolata; Dinophyta; Syndiniales; Dino-Group-II; Dino-Group-II-Clade-3; Dino-Group-II-Clade-3_X; Dino-Group-II-Clade-3_X_sp.;
407	670	Alveolates-Syndiniales	Dino-Group-II	Eukaryota; Alveolata; Dinophyta; Syndiniales; Dino-Group-II; Dino-Group-II-Clade-8; Dino-Group-II-Clade-8_X; Dino-Group-II-Clade-8_X_sp.;
1341	520	Alveolates-Syndiniales	Dino-Group-II	Eukaryota; Alveolata; Dinophyta; Syndiniales; Dino-Group-II; Dino-Group-II-Clade-12; Dino-Group-II-Clade-12_X; Dino-Group-II-Clade-12_X_sp.;
2686	445	Alveolates-Syndiniales	Dino-Group-II	Eukaryota; Alveolata; Dinophyta; Syndiniales; Dino-Group-II; Dino-Group-II_X; Dino-Group-II_XX; Dino-Group-II_XX_sp.;
3871	398	Alveolates-Syndiniales	Dino-Group-II	Eukaryota; Alveolata; Dinophyta; Syndiniales; Dino-Group-II; Dino-Group-II-Clade-22; Dino-Group-II-Clade-22_X; Dino-Group-II-Clade-22_X_sp.;
2430	298	Alveolates-Syndiniales	Dino-Group-II	Eukaryota; Alveolata; Dinophyta; Syndiniales; Dino-Group-II; Dino-Group-II-Clade-4; Dino-Group-II-Clade-4_X; Dino-Group-II-Clade-4_X_sp.;
3315	219	Alveolates-Syndiniales	Dino-Group-V	Eukaryota; Alveolata; Dinophyta; Syndiniales; Dino-Group-V; Dino-Group-V_X; Dino-Group-V_XX; Dino-Group-V_XX_sp.;
207	205	Alveolates-Syndiniales	Dino-Group-II	Eukaryota; Alveolata; Dinophyta; Syndiniales; Dino-Group-II; Dino-Group-II-Clade-9; Dino-Group-II-Clade-9_X; Dino-Group-II-Clade-9_X_sp.;
17145	204	Alveolates-Syndiniales	Dino-Group-I	Eukaryota; Alveolata; Dinophyta; Syndiniales; Dino-Group-I; Dino-Group-I-Clade-4; Dino-Group-I-Clade-4_X; Dino-Group-I-Clade-4_X_sp.;
502	179	Alveolates-Syndiniales	Dino-Group-II	Eukaryota; Alveolata; Dinophyta; Syndiniales; Dino-Group-II; Dino-Group-II-Clade-26; Dino-Group-II-Clade-26_X; Dino-Group-II-Clade-26_X_sp.;
190	150	Alveolates-Syndiniales	Dino-Group-II	Eukaryota; Alveolata; Dinophyta; Syndiniales; Dino-Group-II; Dino-Group-II-Clade-15; Dino-Group-II-Clade-15_X; Dino-Group-II-Clade-15_X_sp.;
953	142	Alveolates-Syndiniales	Dino-Group-II	Eukaryota; Alveolata; Dinophyta; Syndiniales; Dino-Group-II; Dino-Group-II-Clade-14; Dino-Group-II-Clade-14_X; Dino-Group-II-Clade-14_X_sp.;
208	133	Alveolates-Syndiniales	Dino-Group-II	Eukaryota; Alveolata; Dinophyta; Syndiniales; Dino-Group-II; Dino-Group-II-Clade-31; Dino-Group-II-Clade-31_X; Dino-Group-II-Clade-31_X_sp.;
338	116	Alveolates-Syndiniales	Dino-Group-II	Eukaryota; Alveolata; Dinophyta; Syndiniales; Dino-Group-II; Dino-Group-II-Clade-21; Dino-Group-II-Clade-21_X; Dino-Group-II-Clade-21_X_sp.;
1873	110	Alveolates-Syndiniales	Dino-Group-II	Eukaryota; Alveolata; Dinophyta; Syndiniales; Dino-Group-II; Dino-Group-II-Clade-36; Dino-Group-II-Clade-36_X; Dino-Group-II-Clade-36_X_sp.;
208	106	Alveolates-Syndiniales	Dino-Group-II	Eukaryota; Alveolata; Dinophyta; Syndiniales; Dino-Group-II; Dino-Group-II_X; Dino-Group-II-Clade-52_X; Dino-Group-II-Clade-52_X_sp.;
5100	97	Alveolates-Syndiniales	Dino-Group-I	Eukaryota; Alveolata; Dinophyta; Syndiniales; Dino-Group-I; Dino-Group-I-Clade-3; Dino-Group-I-Clade-3_X; Dino-Group-I-Clade-3_X_sp.;
358	92	Alveolates-Syndiniales	Dino-Group-II	Eukaryota; Alveolata; Dinophyta; Syndiniales; Dino-Group-II; Dino-Group-II-Clade-38; Dino-Group-II-Clade-38_X; Dino-Group-II-Clade-38_X_sp.;
736	86	Alveolates-Syndiniales	Dino-Group-II	Eukaryota; Alveolata; Dinophyta; Syndiniales; Dino-Group-II; Dino-Group-II-Clade-23; Dino-Group-II-Clade-23_X; Dino-Group-II-Clade-23_X_sp.;
1090	75	Alveolates-Syndiniales	Dino-Group-II	Eukaryota; Alveolata; Dinophyta; Syndiniales; Dino-Group-II; Dino-Group-II-Clade-30; Dino-Group-II-Clade-30_X; Dino-Group-II-Clade-30_X_sp.;
395	72	Alveolates-Syndiniales	Dino-Group-II	Eukaryota; Alveolata; Dinophyta; Syndiniales; Dino-Group-II; Dino-Group-II-Clade-20; Dino-Group-II-Clade-20_X; Dino-Group-II-Clade-20_X_sp.;
34	72	Alveolates-Syndiniales	Dino-Group-II	Eukaryota; Alveolata; Dinophyta; Syndiniales; Dino-Group-II; Dino-Group-II-Clade-28; Dino-Group-II-Clade-28_X; Dino-Group-II-Clade-28_X_sp.;
303	56	Alveolates-Syndiniales	Dino-Group-II	Eukaryota; Alveolata; Dinophyta; Syndiniales; Dino-Group-II; Dino-Group-II-Clade-17; Dino-Group-II-Clade-17_X; Dino-Group-II-Clade-17_X_sp.;
323	44	Alveolates-Syndiniales	Dino-Group-II	Eukaryota; Alveolata; Dinophyta; Syndiniales; Dino-Group-II; Dino-Group-II-Clade-13; Dino-Group-II-Clade-13_X; Dino-Group-II-Clade-13_X_sp.;
63	42	Alveolates-Syndiniales	Dino-Group-II	Eukaryota; Alveolata; Dinophyta; Syndiniales; Dino-Group-II; Dino-Group-II-Clade-29; Dino-Group-II-Clade-29_X; Dino-Group-II-Clade-29_X_sp.;
396	30	Alveolates-Syndiniales	Dino-Group-II	Eukaryota; Alveolata; Dinophyta; Syndiniales; Dino-Group-II; Dino-Group-II-Clade-2; Dino-Group-II-Clade-2_X; Dino-Group-II-Clade-2_X_sp.;
13	29	Alveolates-Syndiniales	Dino-Group-II	Eukaryota; Alveolata; Dinophyta; Syndiniales; Dino-Group-II; Dino-Group-II-Clade-19; Dino-Group-II-Clade-19_X; Dino-Group-II-Clade-19_X_sp.;
213	25	Alveolates-Syndiniales	Dino-Group-II	Eukaryota; Alveolata; Dinophyta; Syndiniales; Dino-Group-II; Dino-Group-II-Clade-47; Dino-Group-II-Clade-47_X; Dino-Group-II-Clade-47_X_sp.;
36	25	Alveolates-Syndiniales	Dino-Group-II	Eukaryota; Alveolata; Dinophyta; Syndiniales; Dino-Group-II; Dino-Group-II-Clade-18; Dino-Group-II-Clade-18_X; Dino-Group-II-Clade-18_X_sp.;
12	23	Alveolates-Syndiniales	Dino-Group-IV	Eukaryota; Alveolata; Dinophyta; Syndiniales; Dino-Group-IV; Dino-Group-IV-Hematodinium-Group; Hematodinium; Hematodinium_sp.;
70	22	Alveolates-Syndiniales	Dino-Group-II	Eukaryota; Alveolata; Dinophyta; Syndiniales; Dino-Group-II; Dino-Group-II-Clade-44; Dino-Group-II-Clade-44_X; Dino-Group-II-Clade-44_X_sp.;
344	19	Alveolates-Syndiniales	Dino-Group-II	Eukaryota; Alveolata; Dinophyta; Syndiniales; Dino-Group-II; Dino-Group-II-Clade-25; Dino-Group-II-Clade-25_X; Dino-Group-II-Clade-25_X_sp.;
93	11	Alveolates-Syndiniales	Dino-Group-II	Eukaryota; Alveolata; Dinophyta; Syndiniales; Dino-Group-II; Dino-Group-II-Clade-33; Dino-Group-II-Clade-33_X; Dino-Group-II-Clade-33_X_sp.;
2	11	Alveolates-Syndiniales	Dino-Group-II	Eukaryota; Alveolata; Dinophyta; Syndiniales; Dino-Group-II; Dino-Group-II-Clade-55; Dino-Group-II-Clade-55_X; Dino-Group-II-Clade-55_X_sp.;
47	9	Alveolates-Syndiniales	Dino-Group-II	Eukaryota; Alveolata; Dinophyta; Syndiniales; Dino-Group-II; Dino-Group-II-Clade-32; Dino-Group-II-Clade-32_X; Dino-Group-II-Clade-32_X_sp.;
74	8	Alveolates-Syndiniales	Dino-Group-II	Eukaryota; Alveolata; Dinophyta; Syndiniales; Dino-Group-II; Dino-Group-II-Clade-39; Dino-Group-II-Clade-39_X; Dino-Group-II-Clade-39_X_sp.;
12	5	Alveolates-Syndiniales	Dino-Group-IV	Eukaryota; Alveolata; Dinophyta; Syndiniales; Dino-Group-IV; Dino-Group-IV-Syndinium-Group; Syndinium; Syndinium_turbo;
46	3	Alveolates-Syndiniales	Dino-Group-I	Eukaryota; Alveolata; Dinophyta; Syndiniales; Dino-Group-I; Dino-Group-I_X; Dino-Group-I_XX; Dino-Group-I_XX_sp.;
119	2	Alveolates-Syndiniales	Dino-Group-I	Eukaryota; Alveolata; Dinophyta; Syndiniales; Dino-Group-I; Dino-Group-I-Clade-7; Dino-Group-I-Clade-7_X; Dino-Group-I-Clade-7_X_sp.;
11	1	Alveolates-Syndiniales	Dino-Group-II	Eukaryota; Alveolata; Dinophyta; Syndiniales; Dino-Group-II; Dino-Group-II-Clade-50; Dino-Group-II-Clade-50_X; Dino-Group-II-Clade-50_X_sp.;
94	0	Alveolates-Syndiniales	Dino-Group-I	Eukaryota; Alveolata; Dinophyta; Syndiniales; Dino-Group-I; Dino-Group-I-Clade-8; Dino-Group-I-Clade-8_X; Dino-Group-I-Clade-8_X_sp.;
57	0	Alveolates-Syndiniales	Dino-Group-I	Eukaryota; Alveolata; Dinophyta; Syndiniales; Dino-Group-I; Dino-Group-I-Clade-2; Dino-Group-I-Clade-2_X; Dino-Group-I-Clade-2_X_sp.;
26	0	Alveolates-Syndiniales	Dino-Group-II	Eukaryota; Alveolata; Dinophyta; Syndiniales; Dino-Group-II; Dino-Group-II-Clade-42; Dino-Group-II-Clade-42_X; Dino-Group-II-Clade-42_X_sp.;
2	0	Alveolates-Syndiniales	Dino-Group-II	Eukaryota; Alveolata; Dinophyta; Syndiniales; Dino-Group-II; Dino-Group-II-Clade-4; Amoebophrya; Amoebophrya_ceratii;
575	1136	Archaeplastids-Chlorophytes	Pyramimonadales	Eukaryota; Archaeplastida; Chlorophyta; Pyramimonadales; Pyramimonadales_X; Pyramimonadales_XX; Pterosperma; Pterosperma_sp.;
1408	937	Archaeplastids-Chlorophytes	Pyramimonadales	Eukaryota; Archaeplastida; Chlorophyta; Pyramimonadales; Pyramimonadales_X; Pyramimonadales_XX; Halosphaera; Halosphaera_sp.;
2494	512	Archaeplastids-Chlorophytes	Trebouxiophyceae	Eukaryota; Archaeplastida; Chlorophyta; Trebouxiophyceae; Trebouxiophyceae_X; Trebouxiophyceae_XX; Botryococcus; Botryococcus_braunii;
649	449	Archaeplastids-Chlorophytes	Pyramimonadales	Eukaryota; Archaeplastida; Chlorophyta; Pyramimonadales; Pyramimonadales_X; Pyramimonadales_XX; Pterosperma; Pterosperma_cristatum;
292	278	Archaeplastids-Chlorophytes	Chlorodendrophyceae	Eukaryota; Archaeplastida; Chlorophyta; Chlorodendrophyceae; Chlorodendrales; Chlorodendraceae; Chlorodendrales_XX; Chlorodendrales_XX_sp.;
24	142	Archaeplastids-Chlorophytes	Prasino-Clade-VII	Eukaryota; Archaeplastida; Chlorophyta; Prasino-Clade-VII; Prasino-Clade-VII_X; Prasino-Clade-VII-A; Prasino-Clade-VII-A-4; Prasino-Clade-VII-A-4_sp.;
4	106	Archaeplastids-Chlorophytes	Prasino-Clade-V	Eukaryota; Archaeplastida; Chlorophyta; Prasino-Clade-V; Pseudoscourfieldiales; Pycnococcaceae; Pycnococcus; Pycnococcus_provasolii;
43	57	Archaeplastids-Chlorophytes	Prasinococcales	Eukaryota; Archaeplastida; Chlorophyta; Prasinococcales; Prasinococcales_X; Prasinococcales-Clade-B; Prasinococcales-Clade-B_X; Prasinococcales-Clade-B1_X_sp.;
7	51	Archaeplastids-Chlorophytes	Prasino-Clade-VII	Eukaryota; Archaeplastida; Chlorophyta; Prasino-Clade-VII; Prasino-Clade-VII_X; Prasino-Clade-VII-A; Prasino-Clade-VII-A-6; Prasino-Clade-VII-A-6_sp.;
184	40	Archaeplastids-Chlorophytes	Prasino-Clade-9	Eukaryota; Archaeplastida; Chlorophyta; Prasino-Clade-9; Prasino-Clade-9_X; Prasino-Clade-9-B; Prasino-Clade-9-B_X; Prasino-Clade-9-B_X_sp.;
0	30	Archaeplastids-Chlorophytes	Prasino-Clade-V	Eukaryota; Archaeplastida; Chlorophyta; Prasino-Clade-V; Pseudoscourfieldiales; Pycnococcaceae; Pycnococcaceae_X; Pycnococcaceae_X_sp.;
8	21	Archaeplastids-Chlorophytes	Chlorodendrophyceae	Eukaryota; Archaeplastida; Chlorophyta; Chlorodendrophyceae; Chlorodendrales; Chlorodendraceae; Tetraselmis; Tetraselmis_sp.;
13	14	Archaeplastids-Chlorophytes	Prasino-Clade-VII	Eukaryota; Archaeplastida; Chlorophyta; Prasino-Clade-VII; Prasino-Clade-VII_X; Prasino-Clade-VII-A; Prasino-Clade-VII-A_X; Prasino-Clade-VII-A_X_sp.;
0	11	Archaeplastids-Chlorophytes	Prasino-Clade-VII	Eukaryota; Archaeplastida; Chlorophyta; Prasino-Clade-VII; Prasino-Clade-VII_X; Prasino-Clade-VII-B; Prasino-Clade-VII-B-1; Prasino-Clade-VII-B-1_sp.;
0	8	Archaeplastids-Chlorophytes	Mamiellophyceae	Eukaryota; Archaeplastida; Chlorophyta; Mamiellophyceae; Mamiellales; Bathycoccaceae; Ostreococcus; Ostreococcus_tauri;
21	7	Archaeplastids-Chlorophytes	Chlorophyta	Eukaryota; Archaeplastida; Chlorophyta; Chlorophyta_X; Chlorophyta_XX; Chlorophyta_XXX; Scotinosphaera; Scotinosphaera_austriaca;
462	5	Archaeplastids-Chlorophytes	Trebouxiophyceae	Eukaryota; Archaeplastida; Chlorophyta; Trebouxiophyceae; Trebouxiophyceae_X; Trebouxiophyceae_XX; Choricystis; Choricystis_sp.;
1	4	Archaeplastids-Chlorophytes	Prasinococcales	Eukaryota; Archaeplastida; Chlorophyta; Prasinococcales; Prasinococcales_X; Prasinococcales-Clade-B; Prasinoderma; Prasinoderma_coloniale;
10	3	Archaeplastids-Chlorophytes	Prasino-Clade-V	Eukaryota; Archaeplastida; Chlorophyta; Prasino-Clade-V; Pseudoscourfieldiales; Pycnococcaceae; Pycnococcaceae-clade1; Pycnococcaceae-clade1-sp.;
1	2	Archaeplastids-Chlorophytes	Chlorophyceae	Eukaryota; Archaeplastida; Chlorophyta; Chlorophyceae; Chlamydomonadales; Chlamydomonadales_X; Chlamydomonadales_XX; Chlamydomonadales_XX_sp.;
0	1	Archaeplastids-Chlorophytes	Mamiellophyceae	Eukaryota; Archaeplastida; Chlorophyta; Mamiellophyceae; Dolichomastigales; Dolichomastigaceae; Dolichomastix; Dolichomastix_tenuilepis;
0	1	Archaeplastids-Chlorophytes	Mamiellophyceae	Eukaryota; Archaeplastida; Chlorophyta; Mamiellophyceae; Mamiellales; Mamiellaceae; RCC391; RCC391_sp.;
2	0	Archaeplastids-Chlorophytes	Chlorodendrophyceae	Eukaryota; Archaeplastida; Chlorophyta; Chlorodendrophyceae; Chlorodendrales; Chlorodendraceae; Tetraselmis; Tetraselmis_striata;
11	0	Archaeplastids-Chlorophytes	Chlorophyceae	Eukaryota; Archaeplastida; Chlorophyta; Chlorophyceae; Sphaeropleales; Sphaeropleales_X; Scenedesmus; Scenedesmus_sp.;
8	0	Archaeplastids-Chlorophytes	Chlorophyceae	Eukaryota; Archaeplastida; Chlorophyta; Chlorophyceae; Chlamydomonadales; Chlamydomonadales_X; Dunaliella; Dunaliella_sp.;
0	0	Archaeplastids-Chlorophytes	Mamiellophyceae	Eukaryota; Archaeplastida; Chlorophyta; Mamiellophyceae; Dolichomastigales; Crustomastigaceae; Crustomastigaceae-AB; Crustomastigaceae-AB_sp.;
7	0	Archaeplastids-Chlorophytes	Prasino-Clade-9	Eukaryota; Archaeplastida; Chlorophyta; Prasino-Clade-9; Prasino-Clade-9_X; Prasino-Clade-9_XX; Prasino-Clade-9_XXX; Prasino-Clade-9_XXX_sp.;
6	0	Archaeplastids-Chlorophytes	Prasino-Clade-VII	Eukaryota; Archaeplastida; Chlorophyta; Prasino-Clade-VII; Prasino-Clade-VII_X; Prasino-Clade-VII-B; Prasino-Clade-VII-B-2; Prasino-Clade-VII-B-2_sp.;
3	17	Archaeplastids-Other	Embryophyceae	Eukaryota; Archaeplastida; Streptophyta; Embryophyceae; Embryophyceae_X; Embryophyceae_XX; Embryophyceae_XXX; Embryophyceae_XXX_sp.;
0	10	Archaeplastids-Other	Staurodesmus	Eukaryota; Archaeplastida; Streptophyta; Zygnemophyceae; Zygnemophyceae_X; Zygnemophyceae_XX; Staurodesmus; Staurodesmus_triangularis;
80	4	Archaeplastids-Other	Heliconia	Eukaryota; Archaeplastida; Streptophyta; Embryophyceae; Embryophyceae_X; Embryophyceae_XX; Heliconia; Heliconia_indica;
0	3	Archaeplastids-Other	Lactuca	Eukaryota; Archaeplastida; Streptophyta; Embryophyceae; Embryophyceae_X; Embryophyceae_XX; Lactuca; Lactuca_serriola;
0	0	Archaeplastids-Other	Citrus	Eukaryota; Archaeplastida; Streptophyta; Embryophyceae; Embryophyceae_X; Embryophyceae_XX; Citrus; Citrus_clementina;
1	0	Archaeplastids-Other	Cucumis	Eukaryota; Archaeplastida; Streptophyta; Embryophyceae; Embryophyceae_X; Embryophyceae_XX; Cucumis; Cucumis_anguria;
0	0	Archaeplastids-Other	Dichelostemma	Eukaryota; Archaeplastida; Streptophyta; Embryophyceae; Embryophyceae_X; Embryophyceae_XX; Dichelostemma; Dichelostemma_ida-maia;
0	0	Archaeplastids-Other	Eucalyptus	Eukaryota; Archaeplastida; Streptophyta; Embryophyceae; Embryophyceae_X; Embryophyceae_XX; Eucalyptus; Eucalyptus_camaldulensis;
224	0	Archaeplastids-Other	Grewia	Eukaryota; Archaeplastida; Streptophyta; Embryophyceae; Embryophyceae_X; Embryophyceae_XX; Grewia; Grewia_occidentalis;
4	0	Archaeplastids-Other	Muscari	Eukaryota; Archaeplastida; Streptophyta; Embryophyceae; Embryophyceae_X; Embryophyceae_XX; Muscari; Muscari_aucheri;
9	0	Archaeplastids-Other	Porphyra	Eukaryota; Archaeplastida; Rhodophyta; Bangiophyceae; Bangiales; Bangiaceae; Porphyra; Porphyra_sp.;
3	0	Archaeplastids-Other	Solanum	Eukaryota; Archaeplastida; Streptophyta; Embryophyceae; Embryophyceae_X; Embryophyceae_XX; Solanum; Solanum_tuberosum;
21	0	Archaeplastids-Other	Sorghum	Eukaryota; Archaeplastida; Streptophyta; Embryophyceae; Embryophyceae_X; Embryophyceae_XX; Sorghum; Sorghum_bicolor;
210	0	Archaeplastids-Other	Xerosicyos	Eukaryota; Archaeplastida; Streptophyta; Embryophyceae; Embryophyceae_X; Embryophyceae_XX; Xerosicyos; Xerosicyos_decaryi;
46	1339	Cryptophytes	Other-unclassified	Eukaryota; Hacrobia; Cryptophyta; Cryptophyceae; Cryptophyceae_X; Goniomonadales; Goniomonas; Goniomonas_sp.;
32	116	Cryptophytes	Other-unclassified	Eukaryota; Hacrobia; Cryptophyta; Cryptophyceae; Cryptophyceae_X; Cryptomonadales; Geminigera; Geminigera_cryophila;
119	38	Cryptophytes	Other-unclassified	Eukaryota; Hacrobia; Cryptophyta; Cryptophyceae; Cryptophyceae_X; Cryptomonadales; Cryptomonadales_X; Cryptomonadales_X_sp.;
0	4	Cryptophytes	Other-unclassified	Eukaryota; Hacrobia; Cryptophyta; Cryptophyceae; Cryptophyceae_X; Cryptomonadales; Proteomonas; Proteomonas_sulcata;
3	2	Cryptophytes	Other-unclassified	Eukaryota; Hacrobia; Cryptophyta; Cryptophyceae; Cryptophyceae_X; Basal_Cryptophyceae-1; Basal_Cryptophyceae-1_X; Basal_Cryptophyceae-1_X_sp.;
0	0	Cryptophytes	Other-unclassified	Eukaryota; Hacrobia; Cryptophyta; Cryptophyceae; Cryptophyceae_X; Basal_Cryptophyceae-2; Basal_Cryptophyceae-2_X; Basal_Cryptophyceae-2_X_sp.;
6	0	Excavates	Diplonemea	Eukaryota; Excavata; Discoba; Euglenozoa; Diplonemea; Diplonemea_X; Diplonemea_XX; Diplonemea_XX_sp.;
3	0	Excavates	Spironucleus	Eukaryota; Excavata; Metamonada; Fornicata; Fornicata_X; Hexamitinae-Enteromonadida; Spironucleus; Spironucleus_sp.;
2	0	Excavates	Trypanosoma	Eukaryota; Excavata; Discoba; Euglenozoa; Kinetoplastida; Trypanosomatidae-Trypanosomes; Trypanosoma; Trypanosoma_sp.;
300	2575	Haptophytes	Chrysochromulinaceae	Eukaryota; Hacrobia; Haptophyta; Prymnesiophyceae; Prymnesiales; Chrysochromulinaceae; Chrysochromulina; Chrysochromulina_sp.;
500	2216	Haptophytes	Phaeocystaceae	Eukaryota; Hacrobia; Haptophyta; Prymnesiophyceae; Phaeocystales; Phaeocystaceae; Phaeocystis; Phaeocystis_sp.;
64	1947	Haptophytes	Chrysochromulinaceae	Eukaryota; Hacrobia; Haptophyta; Prymnesiophyceae; Prymnesiales; Chrysochromulinaceae; Chrysochromulina; Chrysochromulina_simplex;
725	1682	Haptophytes	Haptophyta	Eukaryota; Hacrobia; Haptophyta; Haptophyta_X; Haptophyta_XX; Haptophyta_XXX; Haptophyta_XXXX; Haptophyta_XXXX_sp.;
1497	1682	Haptophytes	Prymnesiaceae	Eukaryota; Hacrobia; Haptophyta; Prymnesiophyceae; Prymnesiales; Prymnesiaceae; Haptolina; Haptolina_brevifila;
382	990	Haptophytes	Prymnesiaceae	Eukaryota; Hacrobia; Haptophyta; Prymnesiophyceae; Prymnesiales; Prymnesiaceae; Dicrateria; Dicrateria_inornata;
324	767	Haptophytes	Haptophyta_Clade_HAP2	Eukaryota; Hacrobia; Haptophyta; Haptophyta_Clade_HAP2; Haptophyta_Clade_HAP2_X; Haptophyta_Clade_HAP2_XX; Haptophyta_Clade_HAP2_XXX; Haptophyta_Clade_HAP2_XXX_sp.;
257	610	Haptophytes	Phaeocystaceae	Eukaryota; Hacrobia; Haptophyta; Prymnesiophyceae; Phaeocystales; Phaeocystaceae; Phaeocystis; Phaeocystis_antarctica;
162	559	Haptophytes	Haptophyta_Clade_HAP3	Eukaryota; Hacrobia; Haptophyta; Haptophyta_Clade_HAP3; Haptophyta_Clade_HAP3_X; Haptophyta_Clade_HAP3_XX; Haptophyta_Clade_HAP3_XXX; Haptophyta_Clade_HAP3_XXX_sp.;
116	501	Haptophytes	Prymnesiaceae	Eukaryota; Hacrobia; Haptophyta; Prymnesiophyceae; Prymnesiales; Prymnesiaceae; Prymnesium; Prymnesium_aff_polylepis;
98	415	Haptophytes	Watznaueriaceae	Eukaryota; Hacrobia; Haptophyta; Prymnesiophyceae; Calcihaptophycidae; Watznaueriaceae; Tergestiella; Tergestiellaadriatica;
406	324	Haptophytes	Chrysoculteraceae	Eukaryota; Hacrobia; Haptophyta; Prymnesiophyceae; Calcihaptophycidae; Chrysoculteraceae; Chrysoculter; Chrysoculter_sp.;
61	237	Haptophytes	Prymnesiophyceae_Clade_D	Eukaryota; Hacrobia; Haptophyta; Prymnesiophyceae; Prymnesiophyceae_Clade_D; Prymnesiophyceae_Clade_D_X; Prymnesiophyceae_Clade_D_XX; Prymnesiophyceae_Clade_D_XX_sp.;
64	222	Haptophytes	Haptophyta_Clade_HAP4	Eukaryota; Hacrobia; Haptophyta; Haptophyta_Clade_HAP4; Haptophyta_Clade_HAP4_X; Haptophyta_Clade_HAP4_XX; Haptophyta_Clade_HAP4_XXX; Haptophyta_Clade_HAP4_XXX_sp.;
72	215	Haptophytes	Prymnesiophyceae_Clade_B4	Eukaryota; Hacrobia; Haptophyta; Prymnesiophyceae; Prymnesiales; Prymnesiophyceae_Clade_B4; Prymnesiophyceae_Clade_B4_X; Prymnesiophyceae_Clade_B4_X_sp.;
8	187	Haptophytes	Chrysochromulinaceae	Eukaryota; Hacrobia; Haptophyta; Prymnesiophyceae; Prymnesiales; Chrysochromulinaceae; Chrysochromulina; Chrysochromulina_acantha;
280	140	Haptophytes	Calcidiscaceae	Eukaryota; Hacrobia; Haptophyta; Prymnesiophyceae; Coccolithales; Calcidiscaceae; Calcidiscus; Calcidiscus_leptoporus;
78	109	Haptophytes	Prymnesiaceae	Eukaryota; Hacrobia; Haptophyta; Prymnesiophyceae; Prymnesiales; Prymnesiaceae; Haptolina; Haptolina_cf_hirta;
6	96	Haptophytes	Phaeocystaceae	Eukaryota; Hacrobia; Haptophyta; Prymnesiophyceae; Phaeocystales; Phaeocystaceae; Phaeocystis; Phaeocystis_jahnii;
71	63	Haptophytes	Syracosphaeraceae	Eukaryota; Hacrobia; Haptophyta; Prymnesiophyceae; Syracosphaerales; Syracosphaeraceae; Coronosphaera; Coronosphaera_mediterranea;
10	46	Haptophytes	Hymenomonadaceae	Eukaryota; Hacrobia; Haptophyta; Prymnesiophyceae; Coccolithales; Hymenomonadaceae; Ochrosphaera; Ochrosphaera_sp.;
15	41	Haptophytes	Prymnesiophyceae_Clade_B3	Eukaryota; Hacrobia; Haptophyta; Prymnesiophyceae; Prymnesiales; Prymnesiophyceae_Clade_B3; Prymnesiophyceae_Clade_B3_X; Prymnesiophyceae_Clade_B3_X_sp.;
6	40	Haptophytes	Haptophyta_Clade_HAP5	Eukaryota; Hacrobia; Haptophyta; Haptophyta_Clade_HAP5; Haptophyta_Clade_HAP5_X; Haptophyta_Clade_HAP5_XX; Haptophyta_Clade_HAP5_XXX; Haptophyta_Clade_HAP5_XXX_sp.;
13	34	Haptophytes	Calcidiscaceae	Eukaryota; Hacrobia; Haptophyta; Prymnesiophyceae; Coccolithales; Calcidiscaceae; Oolithus; Oolithotus_fragilis;
227	27	Haptophytes	Noelaerhabdaceae	Eukaryota; Hacrobia; Haptophyta; Prymnesiophyceae; Isochrysidales; Noelaerhabdaceae; Emiliania; Emiliania_huxleyi;
1	26	Haptophytes	Braarudosphaeraceae	Eukaryota; Hacrobia; Haptophyta; Prymnesiophyceae; Prymnesiophyceae_X; Braarudosphaeraceae; Braarudosphaeraceae_X; Braarudosphaeraceae_X_sp.;
4	23	Haptophytes	Calyptrosphaeraceae	Eukaryota; Hacrobia; Haptophyta; Prymnesiophyceae; Coccolithales; Calyptrosphaeraceae; Calyptrosphaera; Calyptrosphaera_radiata;
2	19	Haptophytes	Chrysochromulinaceae	Eukaryota; Hacrobia; Haptophyta; Prymnesiophyceae; Prymnesiales; Chrysochromulinaceae; Chrysochromulina; Chrysochromulina_leadbeateri;
2	18	Haptophytes	Phaeocystaceae	Eukaryota; Hacrobia; Haptophyta; Prymnesiophyceae; Phaeocystales; Phaeocystaceae; Phaeocystis; Phaeocystis_globosa;
17	14	Haptophytes	Prymnesiaceae	Eukaryota; Hacrobia; Haptophyta; Prymnesiophyceae; Prymnesiales; Prymnesiaceae; Pseudohaptolina; Pseudohaptolina_arctica;
2	12	Haptophytes	Syracosphaeraceae	Eukaryota; Hacrobia; Haptophyta; Prymnesiophyceae; Syracosphaerales; Syracosphaeraceae; Syracosphaera; Syracosphaera_pulchra;
2	11	Haptophytes	Chrysochromulinaceae	Eukaryota; Hacrobia; Haptophyta; Prymnesiophyceae; Prymnesiales; Chrysochromulinaceae; Chrysochromulina; Chrysochromulina_rotalis;
1	10	Haptophytes	Prymnesiaceae	Eukaryota; Hacrobia; Haptophyta; Prymnesiophyceae; Prymnesiales; Prymnesiaceae; Prymnesium; Prymnesium_nemamethecum;
4	9	Haptophytes	Helicosphaeraceae	Eukaryota; Hacrobia; Haptophyta; Prymnesiophyceae; Zygodiscales; Helicosphaeraceae; Helicosphaera; Helicosphaera_carteri;
2	9	Haptophytes	Hymenomonadaceae	Eukaryota; Hacrobia; Haptophyta; Prymnesiophyceae; Coccolithales; Hymenomonadaceae; Jomonlithus; Jomonlithus_littoralis;
3	9	Haptophytes	Phaeocystaceae	Eukaryota; Hacrobia; Haptophyta; Prymnesiophyceae; Phaeocystales; Phaeocystaceae; Phaeocystis; Phaeocystis_cordata;
17	7	Haptophytes	Braarudosphaeraceae	Eukaryota; Hacrobia; Haptophyta; Prymnesiophyceae; Prymnesiophyceae_X; Braarudosphaeraceae; Braarudosphaera; Braarudosphaera_bigelowii;
0	6	Haptophytes	Chrysochromulinaceae	Eukaryota; Hacrobia; Haptophyta; Prymnesiophyceae; Prymnesiales; Chrysochromulinaceae; Chrysochromulina; Chrysochromulina_campanulifera;
1	6	Haptophytes	Prymnesiaceae	Eukaryota; Hacrobia; Haptophyta; Prymnesiophyceae; Prymnesiales; Prymnesiaceae; Prymnesium; Prymnesium_minus;
5	5	Haptophytes	Calcidiscaceae	Eukaryota; Hacrobia; Haptophyta; Prymnesiophyceae; Coccolithales; Calcidiscaceae; Calcidiscus; Calcidiscus_quadriperforatus;
0	5	Haptophytes	Chrysochromulinaceae	Eukaryota; Hacrobia; Haptophyta; Prymnesiophyceae; Prymnesiales; Chrysochromulinaceae; Chrysochromulina; Chrysochromulina_scutellum;
0	5	Haptophytes	Prymnesiophyceae	Eukaryota; Hacrobia; Haptophyta; Prymnesiophyceae; Prymnesiophyceae_X; Prymnesiophyceae_XX; Prymnesiophyceae_XXX; Prymnesiophyceae_XXX_sp.;
2	5	Haptophytes	Rhabdosphaeraceae	Eukaryota; Hacrobia; Haptophyta; Prymnesiophyceae; Calcihaptophycidae; Rhabdosphaeraceae; Algirosphaera; Algirosphaera_robusta;
0	4	Haptophytes	Prymnesiaceae	Eukaryota; Hacrobia; Haptophyta; Prymnesiophyceae; Prymnesiales; Prymnesiaceae; Prymnesium; Prymnesium_annuliferum;
1	3	Haptophytes	Chrysochromulinaceae	Eukaryota; Hacrobia; Haptophyta; Prymnesiophyceae; Prymnesiales; Chrysochromulinaceae; Chrysochromulina; Chrysochromulina_strobilus;
2	2	Haptophytes	Prymnesiaceae	Eukaryota; Hacrobia; Haptophyta; Prymnesiophyceae; Prymnesiales; Prymnesiaceae; Prymnesiaceae_X; Prymnesiaceae_X_sp.;
0	2	Haptophytes	Prymnesiaceae	Eukaryota; Hacrobia; Haptophyta; Prymnesiophyceae; Prymnesiales; Prymnesiaceae; Prymnesium; Prymnesium_sp.;
0	2	Haptophytes	Prymnesiophyceae_Clade_B5	Eukaryota; Hacrobia; Haptophyta; Prymnesiophyceae; Prymnesiales; Prymnesiophyceae_Clade_B5; Prymnesiophyceae_Clade_B5_X; Prymnesiophyceae_Clade_B5_X_sp.;
3	1	Haptophytes	Chrysoculteraceae	Eukaryota; Hacrobia; Haptophyta; Prymnesiophyceae; Calcihaptophycidae; Chrysoculteraceae; Chrysoculter; Chrysoculter_rhomboideus;
1	1	Haptophytes	Prymnesiophyceae_Clade_C1	Eukaryota; Hacrobia; Haptophyta; Prymnesiophyceae; Isochrysidales; Prymnesiophyceae_Clade_C1; Prymnesiophyceae_Clade_C1_X; Prymnesiophyceae_Clade_C1_X_sp.;
3	0	Haptophytes	Calyptrosphaeraceae	Eukaryota; Hacrobia; Haptophyta; Prymnesiophyceae; Coccolithales; Calyptrosphaeraceae; Calyptrosphaera; Calyptrosphaera_sphaeroidea;
0	0	Haptophytes	Chrysotilaceae	Eukaryota; Hacrobia; Haptophyta; Prymnesiophyceae; Coccolithales; Chrysotilaceae; Chrysotila; Chrysotila_carterae;
1	0	Haptophytes	Noelaerhabdaceae	Eukaryota; Hacrobia; Haptophyta; Prymnesiophyceae; Isochrysidales; Noelaerhabdaceae; Emiliania_Gephyrocapsa; Emiliania_Gephyrocapsa_sp.;
3	0	Haptophytes	Pavlovaceae	Eukaryota; Hacrobia; Haptophyta; Pavlovophyceae; Pavlovales; Pavlovaceae; Pavlova; Pavlova_pinguis;
1	0	Haptophytes	Prymnesiaceae	Eukaryota; Hacrobia; Haptophyta; Prymnesiophyceae; Prymnesiales; Prymnesiaceae; Haptolina; Haptolina_herdlensis;
0	0	Haptophytes	Prymnesiaceae	Eukaryota; Hacrobia; Haptophyta; Prymnesiophyceae; Prymnesiales; Prymnesiaceae; Dicrateria; Dicrateria_rotunda;
3401	30418	Opisthokont-Fungi	Other-unclassified	Eukaryota; Opisthokonta; Fungi; Ascomycota; Pezizomycotina; Sordariomycetes; Sordariomycetes_X; Sordariomycetes_X_sp.;
2070	3241	Opisthokont-Fungi	Other-unclassified	Eukaryota; Opisthokonta; Fungi; Chytridiomycota; Chytridiomycotina; Chytridiomycetes; Chytridiomycetes_X; Chytridiomycetes_X_sp.;
2276	1911	Opisthokont-Fungi	Other-unclassified	Eukaryota; Opisthokonta; Fungi; Ascomycota; Pezizomycotina; Pezizomycotina_X; Pezizomycotina_XX; Pezizomycotina_XX_sp.;
4872	451	Opisthokont-Fungi	Other-unclassified	Eukaryota; Opisthokonta; Fungi; Microsporidiomycota; Microsporidiomycotina; Microsporidiomycotina_X; Nosema; Nosema_ceranae;
944	173	Opisthokont-Fungi	Other-unclassified	Eukaryota; Opisthokonta; Fungi; Ascomycota; Pezizomycotina; Dothideomycetes; Massaria; Massaria_conspurcata;
78	145	Opisthokont-Fungi	Other-unclassified	Eukaryota; Opisthokonta; Fungi; Ascomycota; Pezizomycotina; Dothideomycetes; Dothideomycetes_X; Dothideomycetes_X_sp.;
383	128	Opisthokont-Fungi	Other-unclassified	Eukaryota; Opisthokonta; Fungi; Ascomycota; Pezizomycotina; Pezizomycotina_X; Phaeobotryosphaeria; Phaeobotryosphaeria_visci;
618	115	Opisthokont-Fungi	Other-unclassified	Eukaryota; Opisthokonta; Fungi; Chytridiomycota; Chytridiomycotina; Chytridiomycotina_X; Chytridiomycotina_XX; Chytridiomycotina_XX_sp.;
469	106	Opisthokont-Fungi	Other-unclassified	Eukaryota; Opisthokonta; Fungi; Ascomycota; Pezizomycotina; Eurotiomycetes; Penicillium; Penicillium_sp.;
15	101	Opisthokont-Fungi	Other-unclassified	Eukaryota; Opisthokonta; Fungi; Chytridiomycota; Chytridiomycotina; Chytridiomycetes; Spizellomycetales-and-Rhizophlyctidales; Spizellomycetales-and-Rhizophlyctidales_sp.;
295	87	Opisthokont-Fungi	Other-unclassified	Eukaryota; Opisthokonta; Fungi; Ascomycota; Saccharomycotina; Saccharomycetales; Ashbya; Ashbya_gossypii;
41	66	Opisthokont-Fungi	Other-unclassified	Eukaryota; Opisthokonta; Fungi; Basidiomycota; Ustilaginomycotina; Ustilaginomycotina_X; Ustilaginomycotina_XX; Ustilaginomycotina_XX_sp.;
0	56	Opisthokont-Fungi	Other-unclassified	Eukaryota; Opisthokonta; Fungi; Ascomycota; Pezizomycotina; Sordariomycetes; Polycephalomyces; Polycephalomyces_prolificus;
8	29	Opisthokont-Fungi	Other-unclassified	Eukaryota; Opisthokonta; Fungi; Fungi_X; Fungi_XX; Fungi_XXX; Fungi_XXXX; Fungi_XXXX_sp.;
21	27	Opisthokont-Fungi	Other-unclassified	Eukaryota; Opisthokonta; Fungi; Basidiomycota; Agaricomycotina; Tremellomycetes; Cryptococcus; Cryptococcus_sp.;
1	22	Opisthokont-Fungi	Other-unclassified	Eukaryota; Opisthokonta; Fungi; Ascomycota; Pezizomycotina; Dothideomycetes; Cenococcum; Cenococcum_geophilum;
0	21	Opisthokont-Fungi	Other-unclassified	Eukaryota; Opisthokonta; Fungi; Chytridiomycota; Chytridiomycotina; Chytridiomycetes; Nowakowskiella; Nowakowskiella_elegans;
18	11	Opisthokont-Fungi	Other-unclassified	Eukaryota; Opisthokonta; Fungi; Glomeromycota; Glomeromycotina; Glomeromycetes; Glomus; Glomus_sp.;
1	9	Opisthokont-Fungi	Other-unclassified	Eukaryota; Opisthokonta; Fungi; Ascomycota; Pezizomycotina; Dothideomycetes; Pyrenochaeta; Pyrenochaeta_quercina;
4	6	Opisthokont-Fungi	Other-unclassified	Eukaryota; Opisthokonta; Fungi; Basidiomycota; Ustilaginomycotina; Exobasidiomycetes; Exobasidiomycetes_X; Exobasidiomycetes_X_sp.;
73	5	Opisthokont-Fungi	Other-unclassified	Eukaryota; Opisthokonta; Fungi; Ascomycota; Pezizomycotina; Eurotiomycetes; Eurotiomycetes_X; Eurotiomycetes_X_sp.;
28	4	Opisthokont-Fungi	Other-unclassified	Eukaryota; Opisthokonta; Fungi; Ascomycota; Pezizomycotina; Dothideomycetes; Mycosphaerella; Mycosphaerella_tasmaniensis;
23	4	Opisthokont-Fungi	Other-unclassified	Eukaryota; Opisthokonta; Fungi; Basidiomycota; Agaricomycotina; Tremellomycetes; Tremellomycetes_X; Tremellomycetes_X_sp.;
0	2	Opisthokont-Fungi	Other-unclassified	Eukaryota; Opisthokonta; Fungi; Ascomycota; Pezizomycotina; Eurotiomycetes; Coniosporium; Coniosporium_apollinis;
0	2	Opisthokont-Fungi	Other-unclassified	Eukaryota; Opisthokonta; Fungi; Ascomycota; Pezizomycotina; Sordariomycetes; Ophiocordyceps; Ophiocordyceps_caloceroides;
326	1	Opisthokont-Fungi	Other-unclassified	Eukaryota; Opisthokonta; Fungi; Ascomycota; Pezizomycotina; Leotiomycetes; Helotiales; Helotiales_sp.;
23	1	Opisthokont-Fungi	Other-unclassified	Eukaryota; Opisthokonta; Fungi; Ascomycota; Saccharomycotina; Saccharomycetales; Priceomyces; Priceomyces_haplophilus;
10	1	Opisthokont-Fungi	Other-unclassified	Eukaryota; Opisthokonta; Fungi; Ascomycota; Pezizomycotina; Leotiomycetes; Leotiomycetes_X; Leotiomycetes_X_sp.;
2	1	Opisthokont-Fungi	Other-unclassified	Eukaryota; Opisthokonta; Fungi; Ascomycota; Pezizomycotina; Sordariomycetes; Apiospora; Apiospora_sinensis;
0	1	Opisthokont-Fungi	Other-unclassified	Eukaryota; Opisthokonta; Fungi; Ascomycota; Pezizomycotina; Dothideomycetes; Jahnula; Jahnula_seychellensis;
0	1	Opisthokont-Fungi	Other-unclassified	Eukaryota; Opisthokonta; Fungi; Mucoromycota; Mucoromycotina; Mucoromycotina_X; Umbelopsis; Umbelopsis_autotrophica;
7	0	Opisthokont-Fungi	Other-unclassified	Eukaryota; Opisthokonta; Fungi; Ascomycota; Taphrinomycotina; Taphrinomycetes; Protomyces; Protomyces_inouyei;
3	0	Opisthokont-Fungi	Other-unclassified	Eukaryota; Opisthokonta; Fungi; Ascomycota; Pezizomycotina; Dothideomycetes; Cladosporium; Cladosporium_sp.;
3	0	Opisthokont-Fungi	Other-unclassified	Eukaryota; Opisthokonta; Fungi; Ascomycota; Pezizomycotina; Sordariomycetes; Pseudallescheria; Pseudallescheria_sp.;
3	0	Opisthokont-Fungi	Other-unclassified	Eukaryota; Opisthokonta; Fungi; Basidiomycota; Agaricomycotina; Agaricomycetes; Agaricomycetes_X; Agaricomycetes_X_sp.;
2	0	Opisthokont-Fungi	Other-unclassified	Eukaryota; Opisthokonta; Fungi; Basidiomycota; Ustilaginomycotina; Exobasidiomycetes; Malassezia; Malassezia_globosa;
1	0	Opisthokont-Fungi	Other-unclassified	Eukaryota; Opisthokonta; Fungi; Ascomycota; Pezizomycotina; Lecanoromycetes; Pyxine; Pyxine_sorediata;
1	0	Opisthokont-Fungi	Other-unclassified	Eukaryota; Opisthokonta; Fungi; Ascomycota; Pezizomycotina; Sordariomycetes; Metarhizium; Metarhizium_anisopliae;
5124	25964	Opisthokont-Metazoa	Nematoda	Eukaryota; Opisthokonta; Metazoa; Nematoda; Enoplea; Enoplea_X; Mylonchulus; Mylonchulus_brachyuris;
537	4523	Opisthokont-Metazoa	Arthropoda	Eukaryota; Opisthokonta; Metazoa; Arthropoda; Chelicerata; Arachnida; Plexippus; Plexippus_paykulli;
4992	2388	Opisthokont-Metazoa	Urochordata	Eukaryota; Opisthokonta; Metazoa; Urochordata; Urochordata_X; Appendicularia; Appendicularia_X; Appendicularia_X_sp.;
9669	1457	Opisthokont-Metazoa	Arthropoda	Eukaryota; Opisthokonta; Metazoa; Arthropoda; Hexapoda; Insecta; Almeida; Almeida_pilosa;
36	1371	Opisthokont-Metazoa	Nematoda	Eukaryota; Opisthokonta; Metazoa; Nematoda; Enoplea; Enoplea_X; Bathyeurystomina; Bathyeurystomina_sp.;
11013	1071	Opisthokont-Metazoa	Urochordata	Eukaryota; Opisthokonta; Metazoa; Urochordata; Urochordata_X; Appendicularia; Oikopleura; Oikopleura_dioica;
134185	766	Opisthokont-Metazoa	Arthropoda	Eukaryota; Opisthokonta; Metazoa; Arthropoda; Crustacea; Maxillopoda; Maxillopoda_X; Maxillopoda_X_sp.;
737	483	Opisthokont-Metazoa	Arthropoda	Eukaryota; Opisthokonta; Metazoa; Arthropoda; Hexapoda; Insecta; Isostasius; Isostasius_sp.;
54644	366	Opisthokont-Metazoa	Arthropoda	Eukaryota; Opisthokonta; Metazoa; Arthropoda; Crustacea; Maxillopoda; Paracalanus; Paracalanus_parvus;
13831	345	Opisthokont-Metazoa	Cnidaria	Eukaryota; Opisthokonta; Metazoa; Cnidaria; Cnidaria_X; Hydrozoa; Hydrozoa_X; Hydrozoa_X_sp.;
2687	192	Opisthokont-Metazoa	Urochordata	Eukaryota; Opisthokonta; Metazoa; Urochordata; Urochordata_X; Ascidiacea; Dolioletta; Dolioletta_gegenbauri;
14934	167	Opisthokont-Metazoa	Arthropoda	Eukaryota; Opisthokonta; Metazoa; Arthropoda; Crustacea; Maxillopoda; Acartia; Acartia_longiremis;
3910	124	Opisthokont-Metazoa	Arthropoda	Eukaryota; Opisthokonta; Metazoa; Arthropoda; Crustacea; Maxillopoda; Clausocalanus; Clausocalanus_furcatus;
2338	91	Opisthokont-Metazoa	Nematoda	Eukaryota; Opisthokonta; Metazoa; Nematoda; Chromadorea; Chromadorea_X; Globodera; Globodera_pallida;
4	90	Opisthokont-Metazoa	Arthropoda	Eukaryota; Opisthokonta; Metazoa; Arthropoda; Chelicerata; Arachnida; Diplocentria; Diplocentria_bidentata;
613	78	Opisthokont-Metazoa	Arthropoda	Eukaryota; Opisthokonta; Metazoa; Arthropoda; Crustacea; Maxillopoda; Calocalanus; Calocalanus_minutus;
5	53	Opisthokont-Metazoa	Arthropoda	Eukaryota; Opisthokonta; Metazoa; Arthropoda; Hexapoda; Insecta; Pteronarcys; Pteronarcys_badia;
987	42	Opisthokont-Metazoa	Annelida	Eukaryota; Opisthokonta; Metazoa; Annelida; Annelida_X; Annelida_XX; Alciopina; Alciopina_sp.;
6902	37	Opisthokont-Metazoa	Arthropoda	Eukaryota; Opisthokonta; Metazoa; Arthropoda; Crustacea; Maxillopoda; Sapphirina; Sapphirina_scarlata;
42	36	Opisthokont-Metazoa	Cnidaria	Eukaryota; Opisthokonta; Metazoa; Cnidaria; Cnidaria_X; Hydrozoa; Aglaura; Aglaura_hemistoma;
38	35	Opisthokont-Metazoa	Arthropoda	Eukaryota; Opisthokonta; Metazoa; Arthropoda; Hexapoda; Insecta; Rhopalotria; Rhopalotria_sp.;
1572	32	Opisthokont-Metazoa	Arthropoda	Eukaryota; Opisthokonta; Metazoa; Arthropoda; Crustacea; Maxillopoda; Bestiolina; Bestiolina_similis;
20489	31	Opisthokont-Metazoa	Arthropoda	Eukaryota; Opisthokonta; Metazoa; Arthropoda; Crustacea; Maxillopoda; Cosmocalanus; Cosmocalanus_darwinii;
680	29	Opisthokont-Metazoa	Arthropoda	Eukaryota; Opisthokonta; Metazoa; Arthropoda; Crustacea; Maxillopoda; Calocalanus; Calocalanus_sp.;
169	26	Opisthokont-Metazoa	Porifera	Eukaryota; Opisthokonta; Metazoa; Porifera; Porifera_X; Demospongiae; Topsentia; Topsentia_halichondrioides;
18	25	Opisthokont-Metazoa	Arthropoda	Eukaryota; Opisthokonta; Metazoa; Arthropoda; Hexapoda; Insecta; Stephostethus; Stephostethus_liratus;
0	22	Opisthokont-Metazoa	Annelida	Eukaryota; Opisthokonta; Metazoa; Annelida; Annelida_X; Annelida_XX; Annelida_XXX; Annelida_XXX_sp.;
682	18	Opisthokont-Metazoa	Ctenophora	Eukaryota; Opisthokonta; Metazoa; Ctenophora; Ctenophora_X; Ctenophora_XX; Undescribed; Undescribed_Lobata;
1	17	Opisthokont-Metazoa	Craniata	Eukaryota; Opisthokonta; Metazoa; Craniata; Craniata_X; Polypteriformes; Polypterus; Polypterus_delhezi;
1848	16	Opisthokont-Metazoa	Arthropoda	Eukaryota; Opisthokonta; Metazoa; Arthropoda; Crustacea; Maxillopoda; Copilia; Copilia_mirabilis;
627	15	Opisthokont-Metazoa	Arthropoda	Eukaryota; Opisthokonta; Metazoa; Arthropoda; Crustacea; Maxillopoda; Acartia; Acartia_negligens;
339	12	Opisthokont-Metazoa	Arthropoda	Eukaryota; Opisthokonta; Metazoa; Arthropoda; Crustacea; Maxillopoda; Calocalanus; Calocalanus_pavo;
100	10	Opisthokont-Metazoa	Ctenophora	Eukaryota; Opisthokonta; Metazoa; Ctenophora; Ctenophora_X; Ctenophora_XX; Hormiphora; Hormiphora_sp.;
33	9	Opisthokont-Metazoa	Mollusca	Eukaryota; Opisthokonta; Metazoa; Mollusca; Gastropoda; Vetigastropoda; Scutus; Scutus_howensis;
591	7	Opisthokont-Metazoa	Arthropoda	Eukaryota; Opisthokonta; Metazoa; Arthropoda; Crustacea; Maxillopoda; Calocalanus; Calocalanus_plumulosus;
6	7	Opisthokont-Metazoa	Arthropoda	Eukaryota; Opisthokonta; Metazoa; Arthropoda; Crustacea; Malacostraca; Parastylodactylus; Parastylodactylus_bimaxillaris;
119	7	Opisthokont-Metazoa	Cnidaria	Eukaryota; Opisthokonta; Metazoa; Cnidaria; Cnidaria_X; Hydrozoa; Eudendrium; Eudendrium_racemosum;
125	7	Opisthokont-Metazoa	Craniata	Eukaryota; Opisthokonta; Metazoa; Craniata; Craniata_X; Mammalia; Ochotona; Ochotona_princeps;
80	6	Opisthokont-Metazoa	Ctenophora	Eukaryota; Opisthokonta; Metazoa; Ctenophora; Ctenophora_X; Ctenophora_XX; Ctenophora_XXX; Ctenophora_XXX_sp.;
68	5	Opisthokont-Metazoa	Ctenophora	Eukaryota; Opisthokonta; Metazoa; Ctenophora; Ctenophora_X; Ctenophora_XX; Coeloplana; Coeloplana_bocki;
184	4	Opisthokont-Metazoa	Arthropoda	Eukaryota; Opisthokonta; Metazoa; Arthropoda; Crustacea; Maxillopoda; Delibus; Delibus_nudus;
2	3	Opisthokont-Metazoa	Craniata	Eukaryota; Opisthokonta; Metazoa; Craniata; Craniata_X; Craniata_XX; Craniata_XXX; Craniata_XXX_sp.;
2	3	Opisthokont-Metazoa	Craniata	Eukaryota; Opisthokonta; Metazoa; Craniata; Craniata_X; Mammalia; Trichosurus; Trichosurus_vulpecula;
1	3	Opisthokont-Metazoa	Craniata	Eukaryota; Opisthokonta; Metazoa; Craniata; Craniata_X; Teleostei; Tetraodon; Tetraodon_nigroviridis;
10	2	Opisthokont-Metazoa	Arthropoda	Eukaryota; Opisthokonta; Metazoa; Arthropoda; Hexapoda; Insecta; Zygaena; Zygaena_nevadensis;
1	2	Opisthokont-Metazoa	Arthropoda	Eukaryota; Opisthokonta; Metazoa; Arthropoda; Chelicerata; Arachnida; Trhypochthonius; Trhypochthonius_silvestris;
4	1	Opisthokont-Metazoa	Annelida	Eukaryota; Opisthokonta; Metazoa; Annelida; Annelida_X; Annelida_XX; Hirudo; Hirudo_verbana;
64	1	Opisthokont-Metazoa	Arthropoda	Eukaryota; Opisthokonta; Metazoa; Arthropoda; Crustacea; Maxillopoda; Paracalanus; Paracalanus_sp.;
30	1	Opisthokont-Metazoa	Arthropoda	Eukaryota; Opisthokonta; Metazoa; Arthropoda; Crustacea; Maxillopoda; Centropages; Centropages_violaceus;
1	1	Opisthokont-Metazoa	Arthropoda	Eukaryota; Opisthokonta; Metazoa; Arthropoda; Chelicerata; Arachnida; Aphodanoetus; Aphodanoetus_teinophallus;
0	1	Opisthokont-Metazoa	Arthropoda	Eukaryota; Opisthokonta; Metazoa; Arthropoda; Crustacea; Malacostraca; Thysanopoda; Thysanopoda_aequalis;
8	1	Opisthokont-Metazoa	Cnidaria	Eukaryota; Opisthokonta; Metazoa; Cnidaria; Cnidaria_X; Hydrozoa; Pantachogon; Pantachogon_haeckeli;
1	1	Opisthokont-Metazoa	Cnidaria	Eukaryota; Opisthokonta; Metazoa; Cnidaria; Cnidaria_X; Hydrozoa; Clava; Clava_multicornis;
4	1	Opisthokont-Metazoa	Craniata	Eukaryota; Opisthokonta; Metazoa; Craniata; Craniata_X; Mammalia; Homo; Homo_sapiens;
9	1	Opisthokont-Metazoa	Ctenophora	Eukaryota; Opisthokonta; Metazoa; Ctenophora; Ctenophora_X; Ctenophora_XX; Charistephane; Charistephane_fugiens;
6	1	Opisthokont-Metazoa	Mollusca	Eukaryota; Opisthokonta; Metazoa; Mollusca; Gastropoda; Caenogastropoda; Cancellopollia; Cancellopollia_sp.;
5	1	Opisthokont-Metazoa	Mollusca	Eukaryota; Opisthokonta; Metazoa; Mollusca; Gastropoda; Heterobranchia; Creseis; Creseis_sp.;
0	1	Opisthokont-Metazoa	Mollusca	Eukaryota; Opisthokonta; Metazoa; Mollusca; Gastropoda; Caenogastropoda; Ceritoturris; Ceritoturris_pupiformis;
4	0	Opisthokont-Metazoa	Annelida	Eukaryota; Opisthokonta; Metazoa; Annelida; Annelida_X; Annelida_XX; Eteone; Eteone_longa;
1	0	Opisthokont-Metazoa	Annelida	Eukaryota; Opisthokonta; Metazoa; Annelida; Annelida_X; Annelida_XX; Anaitides; Anaitides_sp.;
1775	0	Opisthokont-Metazoa	Arthropoda	Eukaryota; Opisthokonta; Metazoa; Arthropoda; Crustacea; Maxillopoda; Neocalanus; Neocalanus_cristatus;
58	0	Opisthokont-Metazoa	Arthropoda	Eukaryota; Opisthokonta; Metazoa; Arthropoda; Crustacea; Maxillopoda; Sapphirina; Sapphirina_darwinii;
53	0	Opisthokont-Metazoa	Arthropoda	Eukaryota; Opisthokonta; Metazoa; Arthropoda; Crustacea; Maxillopoda; Delibus; Delibus_sp.;
47	0	Opisthokont-Metazoa	Arthropoda	Eukaryota; Opisthokonta; Metazoa; Arthropoda; Crustacea; Malacostraca; Nyctiphanes; Nyctiphanes_simplex;
29	0	Opisthokont-Metazoa	Arthropoda	Eukaryota; Opisthokonta; Metazoa; Arthropoda; Crustacea; Maxillopoda; Paracalanus; Paracalanus_indicus;
13	0	Opisthokont-Metazoa	Arthropoda	Eukaryota; Opisthokonta; Metazoa; Arthropoda; Crustacea; Maxillopoda; Acrocalanus; Acrocalanus_sp.;
10	0	Opisthokont-Metazoa	Arthropoda	Eukaryota; Opisthokonta; Metazoa; Arthropoda; Crustacea; Maxillopoda; Acrocalanus; Acrocalanus_gibber;
9	0	Opisthokont-Metazoa	Arthropoda	Eukaryota; Opisthokonta; Metazoa; Arthropoda; Crustacea; Maxillopoda; Oithona; Oithona_sp.;
6	0	Opisthokont-Metazoa	Arthropoda	Eukaryota; Opisthokonta; Metazoa; Arthropoda; Chelicerata; Arachnida; Hyptiotes; Hyptiotes_gertschi;
5	0	Opisthokont-Metazoa	Arthropoda	Eukaryota; Opisthokonta; Metazoa; Arthropoda; Hexapoda; Insecta; Sarcophila; Sarcophila_sp.;
4	0	Opisthokont-Metazoa	Arthropoda	Eukaryota; Opisthokonta; Metazoa; Arthropoda; Crustacea; Maxillopoda; Acrocalanus; Acrocalanus_monachus;
4	0	Opisthokont-Metazoa	Arthropoda	Eukaryota; Opisthokonta; Metazoa; Arthropoda; Crustacea; Maxillopoda; Bathycalanus; Bathycalanus_princeps;
4	0	Opisthokont-Metazoa	Arthropoda	Eukaryota; Opisthokonta; Metazoa; Arthropoda; Hexapoda; Insecta; Neorileya; Neorileya_meridionalis;
2	0	Opisthokont-Metazoa	Arthropoda	Eukaryota; Opisthokonta; Metazoa; Arthropoda; Crustacea; Malacostraca; Euastacus; Euastacus_yigara;
2	0	Opisthokont-Metazoa	Arthropoda	Eukaryota; Opisthokonta; Metazoa; Arthropoda; Crustacea; Maxillopoda; Calocalanus; Calocalanus_styliremis;
1	0	Opisthokont-Metazoa	Arthropoda	Eukaryota; Opisthokonta; Metazoa; Arthropoda; Hexapoda; Insecta; Docosia; Docosia_gilvipes;
0	0	Opisthokont-Metazoa	Arthropoda	Eukaryota; Opisthokonta; Metazoa; Arthropoda; Crustacea; Malacostraca; Euphausia; Euphausia_mutica;
0	0	Opisthokont-Metazoa	Arthropoda	Eukaryota; Opisthokonta; Metazoa; Arthropoda; Crustacea; Maxillopoda; Miracia; Miracia_efferata;
0	0	Opisthokont-Metazoa	Arthropoda	Eukaryota; Opisthokonta; Metazoa; Arthropoda; Crustacea; Maxillopoda; Paracalanus; Paracalanus_denudatus;
0	0	Opisthokont-Metazoa	Arthropoda	Eukaryota; Opisthokonta; Metazoa; Arthropoda; Crustacea; Maxillopoda; Paracalanus; Paracalanus_tropicus;
0	0	Opisthokont-Metazoa	Arthropoda	Eukaryota; Opisthokonta; Metazoa; Arthropoda; Crustacea; Maxillopoda; Subeucalanus; Subeucalanus_subtenuis;
0	0	Opisthokont-Metazoa	Brachiopoda	Eukaryota; Opisthokonta; Metazoa; Brachiopoda; Brachiopoda_X; Brachiopoda_XX; Fallax; Fallax_neocaledonensis;
1	0	Opisthokont-Metazoa	Chaetognatha	Eukaryota; Opisthokonta; Metazoa; Chaetognatha; Aphragmophora; Aphragmophora_X; Aidanosagitta; Aidanosagitta_neglecta;
13	0	Opisthokont-Metazoa	Cnidaria	Eukaryota; Opisthokonta; Metazoa; Cnidaria; Cnidaria_X; Hydrozoa; Apolemia; Apolemia_sp.;
10	0	Opisthokont-Metazoa	Cnidaria	Eukaryota; Opisthokonta; Metazoa; Cnidaria; Cnidaria_X; Hydrozoa; Stylaster; Stylaster_duchassaingii;
8	0	Opisthokont-Metazoa	Cnidaria	Eukaryota; Opisthokonta; Metazoa; Cnidaria; Cnidaria_X; Hydrozoa; Bargmannia; Bargmannia_elongata;
8	0	Opisthokont-Metazoa	Cnidaria	Eukaryota; Opisthokonta; Metazoa; Cnidaria; Cnidaria_X; Hydrozoa; Geryonia; Geryonia_proboscidalis;
7	0	Opisthokont-Metazoa	Cnidaria	Eukaryota; Opisthokonta; Metazoa; Cnidaria; Cnidaria_X; Hydrozoa; Leuckartiara; Leuckartiara_octona;
7	0	Opisthokont-Metazoa	Cnidaria	Eukaryota; Opisthokonta; Metazoa; Cnidaria; Cnidaria_X; Hydrozoa; Melicertum; Melicertum_octocostatum;
7	0	Opisthokont-Metazoa	Cnidaria	Eukaryota; Opisthokonta; Metazoa; Cnidaria; Cnidaria_X; Hydrozoa; Stephalia; Stephalia_dilata;
5	0	Opisthokont-Metazoa	Cnidaria	Eukaryota; Opisthokonta; Metazoa; Cnidaria; Cnidaria_X; Hydrozoa; Nanomia; Nanomia_bijuga;
4	0	Opisthokont-Metazoa	Cnidaria	Eukaryota; Opisthokonta; Metazoa; Cnidaria; Cnidaria_X; Hydrozoa; Cordagalma; Cordagalma_cordiforme;
3	0	Opisthokont-Metazoa	Cnidaria	Eukaryota; Opisthokonta; Metazoa; Cnidaria; Cnidaria_X; Hydrozoa; Conopora; Conopora_sp.;
3	0	Opisthokont-Metazoa	Cnidaria	Eukaryota; Opisthokonta; Metazoa; Cnidaria; Cnidaria_X; Hydrozoa; Garveia; Garveia_grisea;
3	0	Opisthokont-Metazoa	Cnidaria	Eukaryota; Opisthokonta; Metazoa; Cnidaria; Cnidaria_X; Hydrozoa; Hydrissa; Hydrissa_sodalis;
3	0	Opisthokont-Metazoa	Cnidaria	Eukaryota; Opisthokonta; Metazoa; Cnidaria; Cnidaria_X; Hydrozoa; Lilyopsis; Lilyopsis_rosea;
3	0	Opisthokont-Metazoa	Cnidaria	Eukaryota; Opisthokonta; Metazoa; Cnidaria; Cnidaria_X; Hydrozoa; Nectopyramis; Nectopyramis_natans;
3	0	Opisthokont-Metazoa	Cnidaria	Eukaryota; Opisthokonta; Metazoa; Cnidaria; Cnidaria_X; Scyphozoa; Aurelia; Aurelia_labiata;
2	0	Opisthokont-Metazoa	Cnidaria	Eukaryota; Opisthokonta; Metazoa; Cnidaria; Cnidaria_X; Hydrozoa; Garveia; Garveia_sp.;
2	0	Opisthokont-Metazoa	Cnidaria	Eukaryota; Opisthokonta; Metazoa; Cnidaria; Cnidaria_X; Hydrozoa; Liriope; Liriope_tetraphylla;
2	0	Opisthokont-Metazoa	Cnidaria	Eukaryota; Opisthokonta; Metazoa; Cnidaria; Cnidaria_X; Hydrozoa; Muggiaea; Muggiaea_sp.;
2	0	Opisthokont-Metazoa	Cnidaria	Eukaryota; Opisthokonta; Metazoa; Cnidaria; Cnidaria_X; Hydrozoa; Sulculeolaria; Sulculeolaria_quadrivalvis;
1	0	Opisthokont-Metazoa	Cnidaria	Eukaryota; Opisthokonta; Metazoa; Cnidaria; Cnidaria_X; Hydrozoa; Chuniphyes; Chuniphyes_multidentata;
1	0	Opisthokont-Metazoa	Cnidaria	Eukaryota; Opisthokonta; Metazoa; Cnidaria; Cnidaria_X; Hydrozoa; Porpita; Porpita_porpita;
0	0	Opisthokont-Metazoa	Cnidaria	Eukaryota; Opisthokonta; Metazoa; Cnidaria; Cnidaria_X; Cnidaria_XX; Cnidaria_XXX; Cnidaria_XXX_sp.;
0	0	Opisthokont-Metazoa	Cnidaria	Eukaryota; Opisthokonta; Metazoa; Cnidaria; Cnidaria_X; Hydrozoa; Bouillonactinia; Bouillonactinia_hooperi;
9	0	Opisthokont-Metazoa	Craniata	Eukaryota; Opisthokonta; Metazoa; Craniata; Craniata_X; Teleostei; Auxis; Auxis_thazard;
7	0	Opisthokont-Metazoa	Craniata	Eukaryota; Opisthokonta; Metazoa; Craniata; Craniata_X; Teleostei; Megalaspis; Megalaspis_cordyla;
4	0	Opisthokont-Metazoa	Craniata	Eukaryota; Opisthokonta; Metazoa; Craniata; Craniata_X; Teleostei; Kareius; Kareius_bicoloratus;
1	0	Opisthokont-Metazoa	Craniata	Eukaryota; Opisthokonta; Metazoa; Craniata; Craniata_X; Mammalia; Tursiops; Tursiops_truncatus;
0	0	Opisthokont-Metazoa	Craniata	Eukaryota; Opisthokonta; Metazoa; Craniata; Craniata_X; Teleostei; Salmo; Salmo_salar;
1	0	Opisthokont-Metazoa	Ctenophora	Eukaryota; Opisthokonta; Metazoa; Ctenophora; Ctenophora_X; Ctenophora_XX; Haeckelia; Haeckelia_rubra;
1	0	Opisthokont-Metazoa	Ctenophora	Eukaryota; Opisthokonta; Metazoa; Ctenophora; Ctenophora_X; Ctenophora_XX; Lampocteis; Lampocteis_cruentiventer;
1	0	Opisthokont-Metazoa	Ctenophora	Eukaryota; Opisthokonta; Metazoa; Ctenophora; Ctenophora_X; Ctenophora_XX; Undescribed; Undescribed_mertensiid;
0	0	Opisthokont-Metazoa	Ctenophora	Eukaryota; Opisthokonta; Metazoa; Ctenophora; Ctenophora_X; Ctenophora_XX; Ocyropsis; Ocyropsis_maculata;
2	0	Opisthokont-Metazoa	Echinodermata	Eukaryota; Opisthokonta; Metazoa; Echinodermata; Echinodermata_X; Echinodermata_XX; Holopneustes; Holopneustes_porosissimus;
1	0	Opisthokont-Metazoa	Metazoa	Eukaryota; Opisthokonta; Metazoa; Metazoa_X; Metazoa_XX; Metazoa_XXX; Metazoa_XXXX; Metazoa_XXXX_sp.;
10	0	Opisthokont-Metazoa	Mollusca	Eukaryota; Opisthokonta; Metazoa; Mollusca; Gastropoda; Caenogastropoda; Echinolittorina; Echinolittorina_tuberculata;
5	0	Opisthokont-Metazoa	Mollusca	Eukaryota; Opisthokonta; Metazoa; Mollusca; Gastropoda; Caenogastropoda; Cremnoconchus; Cremnoconchus_syhadrensis;
1	0	Opisthokont-Metazoa	Mollusca	Eukaryota; Opisthokonta; Metazoa; Mollusca; Bivalvia; Carditoida; Astarte; Astarte_sulcata;
61	0	Opisthokont-Metazoa	Nematoda	Eukaryota; Opisthokonta; Metazoa; Nematoda; Chromadorea; Chromadorea_X; Anguillicoloides; Anguillicoloides_crassus;
8	0	Opisthokont-Metazoa	Nematoda	Eukaryota; Opisthokonta; Metazoa; Nematoda; Chromadorea; Chromadorea_X; Aphelenchoides; Aphelenchoides_sp.;
4	0	Opisthokont-Metazoa	Nematoda	Eukaryota; Opisthokonta; Metazoa; Nematoda; Enoplea; Enoplea_X; Enoplea_XX; Enoplea_XX_sp.;
0	0	Opisthokont-Metazoa	Platyhelminthes	Eukaryota; Opisthokonta; Metazoa; Platyhelminthes; Turbellaria; Acoelomorpha; Convolutidae; Convolutidae_sp.;
2	0	Opisthokont-Metazoa	Porifera	Eukaryota; Opisthokonta; Metazoa; Porifera; Porifera_X; Demospongiae; Halichondria; Halichondria_okadai;
40	0	Opisthokont-Metazoa	Urochordata	Eukaryota; Opisthokonta; Metazoa; Urochordata; Urochordata_X; Ascidiacea; Brooksia; Brooksia_rostrata;
28	0	Opisthokont-Metazoa	Urochordata	Eukaryota; Opisthokonta; Metazoa; Urochordata; Urochordata_X; Appendicularia; Megalocercus; Megalocercus_huxleyi;
16	0	Opisthokont-Metazoa	Urochordata	Eukaryota; Opisthokonta; Metazoa; Urochordata; Urochordata_X; Ascidiacea; Cyclosalpa; Cyclosalpa_polae;
13	0	Opisthokont-Metazoa	Urochordata	Eukaryota; Opisthokonta; Metazoa; Urochordata; Urochordata_X; Ascidiacea; Salpa; Salpa_maxima;
5	0	Opisthokont-Metazoa	Urochordata	Eukaryota; Opisthokonta; Metazoa; Urochordata; Urochordata_X; Ascidiacea; Doliolum; Doliolum_nationalis;
1	0	Opisthokont-Metazoa	Urochordata	Eukaryota; Opisthokonta; Metazoa; Urochordata; Urochordata_X; Ascidiacea; Salpa; Salpa_thompsoni;
0	0	Opisthokont-Metazoa	Urochordata	Eukaryota; Opisthokonta; Metazoa; Urochordata; Urochordata_X; Ascidiacea; Ascidia; Ascidia_sydneiensis_samea;
877	54306	Opisthokonts-Other	Choanoflagellatea	Eukaryota; Opisthokonta; Choanoflagellida; Choanoflagellatea; Acanthoecida; Stephanoecidae_Group_E; Stephanoecidae_Group_E_X; Stephanoecidae_Group_E_X_sp.;
11541	19938	Opisthokonts-Other	Opisthokonta	Eukaryota; Opisthokonta; Opisthokonta_X; Opisthokonta_XX; Opisthokonta_XXX; Opisthokonta_XXXX; Opisthokonta_XXXXX; Opisthokonta_XXXXX_sp.;
369	4640	Opisthokonts-Other	Choanoflagellida	Eukaryota; Opisthokonta; Choanoflagellida; Choanoflagellida_X; Choanoflagellida_XX; Choanoflagellida_XX_Clade-3; Choanoflagellida_XX_Clade-3_X; Choanoflagellida_XX_Clade-3_X_sp.;
64	4619	Opisthokonts-Other	Choanoflagellatea	Eukaryota; Opisthokonta; Choanoflagellida; Choanoflagellatea; Acanthoecida; Stephanoecidae_Group_H; Stephanoecidae_Group_H_X; Stephanoecidae_Group_H_X_sp.;
21	1711	Opisthokonts-Other	Choanoflagellida	Eukaryota; Opisthokonta; Choanoflagellida; Choanoflagellida_X; Choanoflagellida_XX; Choanoflagellida_XXX; Choanoflagellida_XXXX; Choanoflagellida_XXXX_sp.;
19	1025	Opisthokonts-Other	Choanoflagellatea	Eukaryota; Opisthokonta; Choanoflagellida; Choanoflagellatea; Acanthoecida; Stephanoecidae_Group_D; Stephanoecidae_Group_D_X; Stephanoecidae_Group_D_X_sp.;
77	38	Opisthokonts-Other	Choanoflagellatea	Eukaryota; Opisthokonta; Choanoflagellida; Choanoflagellatea; Choanoflagellatea_X; Choanoflagellatea_X_Group_L; Choanoflagellatea_X_Group_L_X; Choanoflagellatea_X_Group_L_X_sp.;
0	6	Opisthokonts-Other	Choanoflagellatea	Eukaryota; Opisthokonta; Choanoflagellida; Choanoflagellatea; Acanthoecida; Stephanoecidae_Group_D; Acanthocorbis; Acanthocorbis_unguiculata;
0	1	Opisthokonts-Other	Choanoflagellatea	Eukaryota; Opisthokonta; Choanoflagellida; Choanoflagellatea; Acanthoecida; Acanthoecida_X; Acanthoecida_XX; Acanthoecida_XX_sp.;
1665	11755	Other/unknown	Telonemia	Eukaryota; Hacrobia; Telonemia; Telonemia_X; Telonemia_XX; Telonemia-Group-2; Telonemia-Group-2_X; Telonemia-Group-2_X_sp.;
1399	11455	Other/unknown	Telonemia	Eukaryota; Hacrobia; Telonemia; Telonemia_X; Telonemia_XX; Telonemia-Group-1; Telonemia-Group-1_X; Telonemia-Group-1_X_sp.;
165	2139	Other/unknown	Centroheliozoa	Eukaryota; Hacrobia; Centroheliozoa; Centroheliozoa_X; Pterocystida; Pterocystida_X; Pterocystida_XX; Pterocystida_XX_sp.;
394	750	Other/unknown	Picozoa	Eukaryota; Hacrobia; Picozoa; Picozoa_X; Picozoa_XX; Picozoa_XXX; Picozoa_XXXX; Picozoa_XXXX_sp.;
627	570	Other/unknown	Katablepharidophyta	Eukaryota; Hacrobia; Katablepharidophyta; Katablepharidaceae; Katablepharidales; Katablepharidales_X; Katablepharidales_XX; Katablepharidales_XX_sp.;
231	547	Other/unknown	Eukaryota	Eukaryota; Eukaryota_X; Eukaryota_XX; Eukaryota_XXX; Eukaryota_XXXX; Eukaryota_XXXXX; Eukaryota_XXXXXX; Eukaryota_XXXXXX_sp.;
0	1	Other/unknown	Centroheliozoa	Eukaryota; Hacrobia; Centroheliozoa; Centroheliozoa_X; Centroheliozoa_XX; Centroheliozoa_XXX; Centroheliozoa_XXXX; Centroheliozoa_XXXX_sp.;
1	1	Other/unknown	Picozoa	Eukaryota; Hacrobia; Picozoa; Picozoa_X; Picozoa_XX; Picozoa_XXX; Picomonas; Picomonas_judraskeda;
394	4231	Rhizaria-Acantharia	Acantharea	Eukaryota; Rhizaria; Radiolaria; Acantharea; Acantharea_X; Acantharea_XX; Acantharea_XXX; Acantharea_XXX_sp.;
601	1997	Rhizaria-Acantharia	Coleaspis	Eukaryota; Rhizaria; Radiolaria; Acantharea; Arthracanthida-Symphyacanthida; Arthracanthida-Symphyacanthida_X; Coleaspis; Coleaspis_vaginata;
466	1747	Rhizaria-Acantharia	Lychnaspis	Eukaryota; Rhizaria; Radiolaria; Acantharea; Arthracanthida-Symphyacanthida; Arthracanthida-Symphyacanthida_X; Lychnaspis; Lychnaspis_giltschi;
15	1626	Rhizaria-Acantharia	Gigartacon	Eukaryota; Rhizaria; Radiolaria; Acantharea; Chaunacanthida; Chaunacanthida_X; Gigartacon; Gigartacon_fragilis;
99	1561	Rhizaria-Acantharia	Acanthocyrta	Eukaryota; Rhizaria; Radiolaria; Acantharea; Acantharea-Group-VI; Acantharea-Group-VI_X; Acanthocyrta; Acanthocyrta_haeckeli;
730	1232	Rhizaria-Acantharia	Lonchostaurus	Eukaryota; Rhizaria; Radiolaria; Acantharea; Arthracanthida-Symphyacanthida; Arthracanthida-Symphyacanthida_X; Lonchostaurus; Lonchostaurus_rombicus;
1862	1166	Rhizaria-Acantharia	Xiphacantha	Eukaryota; Rhizaria; Radiolaria; Acantharea; Arthracanthida-Symphyacanthida; Arthracanthida-Symphyacanthida_X; Xiphacantha; Xiphacantha_alata;
442	1052	Rhizaria-Acantharia	Arthracanthida-Symphyacanthida	Eukaryota; Rhizaria; Radiolaria; Acantharea; Arthracanthida-Symphyacanthida; Arthracanthida-Symphyacanthida_X; Arthracanthida-Symphyacanthida_XX; Arthracanthida-Symphyacanthida_XX_sp.;
1004	653	Rhizaria-Acantharia	Amphibelone	Eukaryota; Rhizaria; Radiolaria; Acantharea; Arthracanthida-Symphyacanthida; Arthracanthida-Symphyacanthida_X; Amphibelone; Amphibelone_anomala;
58	481	Rhizaria-Acantharia	Hexaconus	Eukaryota; Rhizaria; Radiolaria; Acantharea; Arthracanthida-Symphyacanthida; Arthracanthida-Symphyacanthida_X; Hexaconus; Hexaconus_serratus;
56	478	Rhizaria-Acantharia	Chaunacanthida	Eukaryota; Rhizaria; Radiolaria; Acantharea; Chaunacanthida; Chaunacanthida_X; Chaunacanthida_XX; Chaunacanthida_XX_sp.;
137	321	Rhizaria-Acantharia	Gigartacon	Eukaryota; Rhizaria; Radiolaria; Acantharea; Chaunacanthida; Chaunacanthida_X; Gigartacon; Gigartacon_muelleri;
72	266	Rhizaria-Acantharia	Acanthocolla	Eukaryota; Rhizaria; Radiolaria; Acantharea; Acantharea_X; Acantharea_XX; Acanthocolla; Acanthocolla_cruciata;
12	260	Rhizaria-Acantharia	Chaunacanthid	Eukaryota; Rhizaria; Radiolaria; Acantharea; Chaunacanthida; Chaunacanthida_X; Chaunacanthid; Chaunacanthid_sp.;
48	213	Rhizaria-Acantharia	Acanthostaurus	Eukaryota; Rhizaria; Radiolaria; Acantharea; Arthracanthida-Symphyacanthida; Arthracanthida-Symphyacanthida_X; Acanthostaurus; Acanthostaurus_purpurascens;
135	168	Rhizaria-Acantharia	Acanthometron	Eukaryota; Rhizaria; Radiolaria; Acantharea; Chaunacanthida; Chaunacanthida_X; Acanthometron; Acanthometron_sp.;
24	113	Rhizaria-Acantharia	Acantharea-Group-II	Eukaryota; Rhizaria; Radiolaria; Acantharea; Acantharea-Group-II; Acantharea-Group-II_X; Acantharea-Group-II_XX; Acantharea-Group-II_XX_sp.;
29	112	Rhizaria-Acantharia	Heteracon	Eukaryota; Rhizaria; Radiolaria; Acantharea; Chaunacanthida; Chaunacanthida_X; Heteracon; Heteracon_biformis;
2	91	Rhizaria-Acantharia	Acanthocolla	Eukaryota; Rhizaria; Radiolaria; Acantharea; Acantharea_X; Acantharea_XX; Acanthocolla; Acanthocolla_solidissima;
22	84	Rhizaria-Acantharia	Phractopelta	Eukaryota; Rhizaria; Radiolaria; Acantharea; Arthracanthida-Symphyacanthida; Arthracanthida-Symphyacanthida_X; Phractopelta; Phractopelta_sarmentosa;
60	68	Rhizaria-Acantharia	Amphilonche	Eukaryota; Rhizaria; Radiolaria; Acantharea; Arthracanthida-Symphyacanthida; Arthracanthida-Symphyacanthida_X; Amphilonche; Amphilonche_elongata;
7	62	Rhizaria-Acantharia	Acantharea-Group-VI	Eukaryota; Rhizaria; Radiolaria; Acantharea; Acantharea-Group-VI; Acantharea-Group-VI_X; Acantharea-Group-VI_XX; Acantharea-Group-VI_XX_sp.;
39	54	Rhizaria-Acantharia	Staurolithium	Eukaryota; Rhizaria; Radiolaria; Acantharea; Acantharea_X; Acantharea_XX; Staurolithium; Staurolithium_sp.;
13	46	Rhizaria-Acantharia	Amphiacon	Eukaryota; Rhizaria; Radiolaria; Acantharea; Chaunacanthida; Chaunacanthida_X; Amphiacon; Amphiacon_denticulatus;
7	26	Rhizaria-Acantharia	Litholophus	Eukaryota; Rhizaria; Radiolaria; Acantharea; Arthracanthida-Symphyacanthida; Arthracanthida-Symphyacanthida_X; Litholophus; Litholophus_sp.;
7	25	Rhizaria-Acantharia	Symphyacanthida	Eukaryota; Rhizaria; Radiolaria; Acantharea; Chaunacanthida; Chaunacanthida_X; Symphyacanthida; Symphyacanthida_sp.;
58	19	Rhizaria-Acantharia	Phyllostaurus	Eukaryota; Rhizaria; Radiolaria; Acantharea; Arthracanthida-Symphyacanthida; Arthracanthida-Symphyacanthida_X; Phyllostaurus; Phyllostaurus_siculus;
0	6	Rhizaria-Acantharia	Dorataspid	Eukaryota; Rhizaria; Radiolaria; Acantharea; Arthracanthida-Symphyacanthida; Arthracanthida-Symphyacanthida_X; Dorataspid; Dorataspid_sp.;
1	4	Rhizaria-Acantharia	Acanthometra	Eukaryota; Rhizaria; Radiolaria; Acantharea; Arthracanthida-Symphyacanthida; Arthracanthida-Symphyacanthida_X; Acanthometra; Acanthometra_sp.;
4	3	Rhizaria-Acantharia	Stauracantha	Eukaryota; Rhizaria; Radiolaria; Acantharea; Arthracanthida-Symphyacanthida; Arthracanthida-Symphyacanthida_X; Stauracantha; Stauracantha_orthostaura;
5	1	Rhizaria-Acantharia	Acantharea-Group-I	Eukaryota; Rhizaria; Radiolaria; Acantharea; Acantharea-Group-I; Acantharea-Group-I_X; Acantharea-Group-I_XX; Acantharea-Group-I_XX_sp.;
1	1	Rhizaria-Acantharia	Phyllostaurus	Eukaryota; Rhizaria; Radiolaria; Acantharea; Arthracanthida-Symphyacanthida; Arthracanthida-Symphyacanthida_X; Phyllostaurus; Phyllostaurus_quadrangulus;
0	0	Rhizaria-Acantharia	Acantharian	Eukaryota; Rhizaria; Radiolaria; Acantharea; Arthracanthida-Symphyacanthida; Arthracanthida-Symphyacanthida_X; Acantharian; Acantharian_sp.;
0	0	Rhizaria-Acantharia	Xiphacantha	Eukaryota; Rhizaria; Radiolaria; Acantharea; Arthracanthida-Symphyacanthida; Arthracanthida-Symphyacanthida_X; Xiphacantha; Xiphacantha_quadridentata;
180	449	Rhizaria-Cercozoa	Endo4-lineage	Eukaryota; Rhizaria; Cercozoa; Endomyxa; Endomyxa_X; Endo4-lineage; Endo4-lineage_X; Endo4-lineage_X_sp.;
299	128	Rhizaria-Cercozoa	Protaspa	Eukaryota; Rhizaria; Cercozoa; Filosa-Thecofilosea; Cryomonadida; Protaspa-lineage; Protaspa; Protaspa_longipes;
25	90	Rhizaria-Cercozoa	Novel-clade-2	Eukaryota; Rhizaria; Cercozoa; Filosa-Imbricatea; Filosa-Imbricatea_X; Novel-clade-2; Novel-clade-2_X; Novel-clade-2_X_sp.;
96	42	Rhizaria-Cercozoa	Protaspa-lineage	Eukaryota; Rhizaria; Cercozoa; Filosa-Thecofilosea; Cryomonadida; Protaspa-lineage; Protaspa-lineage_X; Protaspa-lineage_X_sp.;
11	16	Rhizaria-Cercozoa	Cryothecomonas	Eukaryota; Rhizaria; Cercozoa; Filosa-Thecofilosea; Cryomonadida; Cryothecomonas-lineage; Cryothecomonas; Cryothecomonas_aestivalis;
1	15	Rhizaria-Cercozoa	Bigelowiella	Eukaryota; Rhizaria; Cercozoa; Filosa-Chlorarachnea; Chlorarachnida; Chlorarachnida_X; Bigelowiella; Bigelowiella_sp.;
0	8	Rhizaria-Cercozoa	Bigelowiella	Eukaryota; Rhizaria; Cercozoa; Filosa-Chlorarachnea; Chlorarachnida; Chlorarachnida_X; Bigelowiella; Bigelowiella_natans;
0	8	Rhizaria-Cercozoa	Leptophrys	Eukaryota; Rhizaria; Cercozoa; Endomyxa; Vampyrellida; Leptophryidae; Leptophrys; Leptophrys_vorax;
5	5	Rhizaria-Cercozoa	NPK2-lineage	Eukaryota; Rhizaria; Cercozoa; Filosa-Chlorarachnea; Filosa-Chlorarachnea_X; NPK2-lineage; NPK2-lineage_X; NPK2-lineage_X_sp.;
0	2	Rhizaria-Cercozoa	Chlorarachnida	Eukaryota; Rhizaria; Cercozoa; Filosa-Chlorarachnea; Chlorarachnida; Chlorarachnida_X; Chlorarachnida_XX; Chlorarachnida_XX_sp.;
4	1	Rhizaria-Cercozoa	Cercomonas	Eukaryota; Rhizaria; Cercozoa; Filosa-Sarcomonadea; Cercomonadida; Cercomonadidae; Cercomonas; Cercomonas_sp.;
5	99	Rhizaria-Foraminifera	Other-unclassified	Eukaryota; Rhizaria; Foraminifera; Globothalamea; Rotaliida; Globigerinacea; Globigerina; Globigerina_bulloides;
0	2	Rhizaria-Foraminifera	Other-unclassified	Eukaryota; Rhizaria; Foraminifera; Globothalamea; Rotaliida; Virgulinellacea; Virgulinella; Virgulinella_fragilis;
7	0	Rhizaria-Foraminifera	Other-unclassified	Eukaryota; Rhizaria; Foraminifera; Globothalamea; Rotaliida; Globorotaliidae; Globorotalia; Globorotalia_truncatulinoides;
167	722	Rhizaria-Polycystines	Pterocorys	Eukaryota; Rhizaria; Radiolaria; Polycystinea; Nassellaria; Pterocoryothoidea; Pterocorys; Pterocorys_zancleus;
1373	301	Rhizaria-Polycystines	Spumellarida-Group-I	Eukaryota; Rhizaria; Radiolaria; Polycystinea; Spumellarida; Spumellarida-Group-I; Spumellarida-Group-I_X; Spumellarida-Group-I_X_sp.;
94	249	Rhizaria-Polycystines	Nassellaria	Eukaryota; Rhizaria; Radiolaria; Polycystinea; Nassellaria; Nassellaria_X; Nassellaria_XX; Nassellaria_XX_sp.;
931	229	Rhizaria-Polycystines	Spumellarida	Eukaryota; Rhizaria; Radiolaria; Polycystinea; Spumellarida; Spumellarida_X; Spumellarida_XX; Spumellarida_XX_sp.;
0	54	Rhizaria-Polycystines	Stylochlamydium	Eukaryota; Rhizaria; Radiolaria; Polycystinea; Spumellarida; Pyloniidae-Spongodiscidae; Stylochlamydium; Stylochlamydium_venustum;
41	51	Rhizaria-Polycystines	Lithomelissa	Eukaryota; Rhizaria; Radiolaria; Polycystinea; Nassellaria; Plagiacanthoidea; Lithomelissa; Lithomelissa_setosa;
59	43	Rhizaria-Polycystines	Eucyrtidium	Eukaryota; Rhizaria; Radiolaria; Polycystinea; Nassellaria; Eurcyrtidioidea; Eucyrtidium; Eucyrtidium_sp.;
31	41	Rhizaria-Polycystines	Didymocyrtis	Eukaryota; Rhizaria; Radiolaria; Polycystinea; Spumellarida; Spongodiscidae-Coccodiscidae; Didymocyrtis; Didymocyrtis_tetrathalamus;
7	33	Rhizaria-Polycystines	Pseudocubus	Eukaryota; Rhizaria; Radiolaria; Polycystinea; Nassellaria; Plagiacanthoidea; Pseudocubus; Pseudocubus_obeliscus;
15	33	Rhizaria-Polycystines	Spongodiscidae-Coccodiscidae	Eukaryota; Rhizaria; Radiolaria; Polycystinea; Spumellarida; Spongodiscidae-Coccodiscidae; Spongodiscidae-Coccodiscidae_X; Spongodiscidae-Coccodiscidae_X_sp.;
33	29	Rhizaria-Polycystines	Pterocorys	Eukaryota; Rhizaria; Radiolaria; Polycystinea; Nassellaria; Pterocoryothoidea; Pterocorys; Pterocorys_sp.;
18	23	Rhizaria-Polycystines	Cypassis	Eukaryota; Rhizaria; Radiolaria; Polycystinea; Spumellarida; Spongodiscidae-Coccodiscidae; Cypassis; Cypassis_irregularis;
15	17	Rhizaria-Polycystines	Pyloniidae-Spongodiscidae	Eukaryota; Rhizaria; Radiolaria; Polycystinea; Spumellarida; Pyloniidae-Spongodiscidae; Pyloniidae-Spongodiscidae_X; Pyloniidae-Spongodiscidae_X_sp.;
4	11	Rhizaria-Polycystines	Dictyocoryne	Eukaryota; Rhizaria; Radiolaria; Polycystinea; Spumellarida; Spongodiscidae-Coccodiscidae; Dictyocoryne; Dictyocoryne_truncatum;
10	5	Rhizaria-Polycystines	Dictyocoryne	Eukaryota; Rhizaria; Radiolaria; Polycystinea; Spumellarida; Spongodiscidae-Coccodiscidae; Dictyocoryne; Dictyocoryne_profunda;
0	2	Rhizaria-Polycystines	Tetrapyle	Eukaryota; Rhizaria; Radiolaria; Polycystinea; Spumellarida; Pyloniidae-Spongodiscidae; Tetrapyle; Tetrapyle_octacantha;
86	1	Rhizaria-Polycystines	Arachnosphaera	Eukaryota; Rhizaria; Radiolaria; Polycystinea; Spumellarida; Spumellarida-Group-I; Arachnosphaera; Arachnosphaera_myriacantha;
18	1	Rhizaria-Polycystines	Dicranastrum	Eukaryota; Rhizaria; Radiolaria; Polycystinea; Spumellarida; Spongodiscidae-Coccodiscidae; Dicranastrum; Dicranastrum_furcatum;
27	1	Rhizaria-Polycystines	Styptosphaera	Eukaryota; Rhizaria; Radiolaria; Polycystinea; Spumellarida; Ethmosphaeridae; Styptosphaera; Styptosphaera_sp.;
2	0	Rhizaria-Polycystines	Cladococcus	Eukaryota; Rhizaria; Radiolaria; Polycystinea; Spumellarida; Spumellarida-Group-I; Cladococcus; Cladococcus_viminalis;
0	0	Rhizaria-Polycystines	Eucyrtidium	Eukaryota; Rhizaria; Radiolaria; Polycystinea; Nassellaria; Eurcyrtidioidea; Eucyrtidium; Eucyrtidium_acuminatum;
1	0	Rhizaria-Polycystines	Phorticium	Eukaryota; Rhizaria; Radiolaria; Polycystinea; Spumellarida; Pyloniidae-Spongodiscidae; Phorticium; Phorticium_clevei;
8	0	Rhizaria-Polycystines	Sphaerozoum	Eukaryota; Rhizaria; Radiolaria; Polycystinea; Collodaria; Sphaerozoidae; Sphaerozoum; Sphaerozoum_trigenimum;
2	0	Rhizaria-Polycystines	Sphaerozoum	Eukaryota; Rhizaria; Radiolaria; Polycystinea; Collodaria; Sphaerozoidae; Sphaerozoum; Sphaerozoum_punctatum;
1	0	Rhizaria-Polycystines	Stylodictya	Eukaryota; Rhizaria; Radiolaria; Polycystinea; Spumellarida; Pyloniidae-Spongodiscidae; Stylodictya; Stylodictya_sp.;
3709	1455	Rhizaria-RAD (A,B,C)	RAD-A	Eukaryota; Rhizaria; Radiolaria; RAD-A; RAD-A_X; RAD-A_XX; RAD-A_XXX; RAD-A_XXX_sp.;
258	146	Rhizaria-RAD (A,B,C)	RAD-B-Group-IV	Eukaryota; Rhizaria; Radiolaria; RAD-B; RAD-B_X; RAD-B-Group-IV; RAD-B-Group-IV_X; RAD-B-Group-IV_X_sp.;
44	32	Rhizaria-RAD (A,B,C)	Sticholonche	Eukaryota; Rhizaria; Radiolaria; RAD-B; RAD-B_X; RAD-B-Group-IV; Sticholonche; Sticholonche_sp.;
5	4	Rhizaria-RAD (A,B,C)	RAD-B-Group-I	Eukaryota; Rhizaria; Radiolaria; RAD-B; RAD-B_X; RAD-B-Group-I; RAD-B-Group-I_X; RAD-B-Group-I_X_sp.;
5	4	Rhizaria-RAD (A,B,C)	RAD-B-Group-II	Eukaryota; Rhizaria; Radiolaria; RAD-B; RAD-B_X; RAD-B-Group-II; RAD-B-Group-II_X; RAD-B-Group-II_X_sp.;
6	2	Rhizaria-RAD (A,B,C)	RAD-C	Eukaryota; Rhizaria; Radiolaria; RAD-C; RAD-C_X; RAD-C_XX; RAD-C_XXX; RAD-C_XXX_sp.;
135	8488	Stramenopiles-Chrysophytes	Chrysophyceae_Clade-H	Eukaryota; Stramenopiles; Ochrophyta; Chrysophyceae; Chrysophyceae_X; Chrysophyceae_Clade-H; Chrysophyceae_Clade-H_X; Chrysophyceae_Clade-H_X_sp.;
30	1471	Stramenopiles-Chrysophytes	Chrysophyceae_Clade-I	Eukaryota; Stramenopiles; Ochrophyta; Chrysophyceae; Chrysophyceae_X; Chrysophyceae_Clade-I; Chrysophyceae_Clade-I_X; Chrysophyceae_Clade-I_X_sp.;
24	843	Stramenopiles-Chrysophytes	Chrysophyceae_Clade-G	Eukaryota; Stramenopiles; Ochrophyta; Chrysophyceae; Chrysophyceae_X; Chrysophyceae_Clade-G; Chrysophyceae_Clade-G_X; Chrysophyceae_Clade-G_X_sp.;
4	90	Stramenopiles-Chrysophytes	Chrysophyceae_Clade-F	Eukaryota; Stramenopiles; Ochrophyta; Chrysophyceae; Chrysophyceae_X; Chrysophyceae_Clade-F; Chrysophyceae_Clade-F_X; Chrysophyceae_Clade-F_X_sp.;
0	3	Stramenopiles-Chrysophytes	Chrysophyceae_Clade-C	Eukaryota; Stramenopiles; Ochrophyta; Chrysophyceae; Chrysophyceae_X; Chrysophyceae_Clade-C; Chrysophyceae_Clade-C_X; Chrysophyceae_Clade-C_X_sp.;
32420	63167	Stramenopiles-Diatoms	Raphid-pennate	Eukaryota; Stramenopiles; Ochrophyta; Bacillariophyta; Bacillariophyta_X; Raphid-pennate; Raphid-pennate_X; Raphid-pennate_X_sp.;
3140	3434	Stramenopiles-Diatoms	Cylindrotheca	Eukaryota; Stramenopiles; Ochrophyta; Bacillariophyta; Bacillariophyta_X; Raphid-pennate; Cylindrotheca; Cylindrotheca_closterium;
306	2742	Stramenopiles-Diatoms	Araphid-pennate	Eukaryota; Stramenopiles; Ochrophyta; Bacillariophyta; Bacillariophyta_X; Araphid-pennate; Araphid-pennate_X; Araphid-pennate_X_sp.;
469	1010	Stramenopiles-Diatoms	Haslea	Eukaryota; Stramenopiles; Ochrophyta; Bacillariophyta; Bacillariophyta_X; Raphid-pennate; Haslea; Haslea_sp.;
392	94	Stramenopiles-Diatoms	Chaetoceros	Eukaryota; Stramenopiles; Ochrophyta; Bacillariophyta; Bacillariophyta_X; Polar-centric-Mediophyceae; Chaetoceros; Chaetoceros_sp.;
29	90	Stramenopiles-Diatoms	Thalassiosira	Eukaryota; Stramenopiles; Ochrophyta; Bacillariophyta; Bacillariophyta_X; Polar-centric-Mediophyceae; Thalassiosira; Thalassiosira_rotula;
203	72	Stramenopiles-Diatoms	Chaetoceros	Eukaryota; Stramenopiles; Ochrophyta; Bacillariophyta; Bacillariophyta_X; Polar-centric-Mediophyceae; Chaetoceros; Chaetoceros_peruvianus;
99	26	Stramenopiles-Diatoms	Actinocyclus	Eukaryota; Stramenopiles; Ochrophyta; Bacillariophyta; Bacillariophyta_X; Radial-centric-basal-Coscinodiscophyceae; Actinocyclus; Actinocyclus_sp.;
1521	15	Stramenopiles-Diatoms	Leptocylindrus	Eukaryota; Stramenopiles; Ochrophyta; Bacillariophyta; Bacillariophyta_X; Radial-centric-basal-Coscinodiscophyceae; Leptocylindrus; Leptocylindrus_sp.;
10	9	Stramenopiles-Diatoms	Asteromphalus	Eukaryota; Stramenopiles; Ochrophyta; Bacillariophyta; Bacillariophyta_X; Radial-centric-basal-Coscinodiscophyceae; Asteromphalus; Asteromphalus_sp.;
9	6	Stramenopiles-Diatoms	Thalassiosira	Eukaryota; Stramenopiles; Ochrophyta; Bacillariophyta; Bacillariophyta_X; Polar-centric-Mediophyceae; Thalassiosira; Thalassiosira_concaviuscula;
0	3	Stramenopiles-Diatoms	Polar-centric-Mediophyceae	Eukaryota; Stramenopiles; Ochrophyta; Bacillariophyta; Bacillariophyta_X; Polar-centric-Mediophyceae; Polar-centric-Mediophyceae_X; Polar-centric-Mediophyceae_X_sp.;
13	2	Stramenopiles-Diatoms	Lithodesmioides	Eukaryota; Stramenopiles; Ochrophyta; Bacillariophyta; Bacillariophyta_X; Polar-centric-Mediophyceae; Lithodesmioides; Lithodesmioides_polymorpha;
0	2	Stramenopiles-Diatoms	Radial-centric-basal-Coscinodiscophyceae	Eukaryota; Stramenopiles; Ochrophyta; Bacillariophyta; Bacillariophyta_X; Radial-centric-basal-Coscinodiscophyceae; Radial-centric-basal-Coscinodiscophyceae_X; Radial-centric-basal-Coscinodiscophyceae_X_sp.;
7	1	Stramenopiles-Diatoms	Stephanodiscus	Eukaryota; Stramenopiles; Ochrophyta; Bacillariophyta; Bacillariophyta_X; Polar-centric-Mediophyceae; Stephanodiscus; Stephanodiscus_binderanus;
846	119467	Stramenopiles-MAST	MAST-3	Eukaryota; Stramenopiles; Stramenopiles_X; MAST; MAST-3; MAST-3I; MAST-3I_X; MAST-3I_X_sp.;
738	14473	Stramenopiles-MAST	MAST-1	Eukaryota; Stramenopiles; Stramenopiles_X; MAST; MAST-1; MAST-1D; MAST-1D_X; MAST-1D_X_sp.;
314	7270	Stramenopiles-MAST	MAST-4	Eukaryota; Stramenopiles; Stramenopiles_X; MAST; MAST-4; MAST-4A; MAST-4A_X; MAST-4A_X_sp.;
18	6301	Stramenopiles-MAST	MAST-3	Eukaryota; Stramenopiles; Stramenopiles_X; MAST; MAST-3; MAST-3L; MAST-3L_X; MAST-3L_X_sp.;
736	5217	Stramenopiles-MAST	MAST-1	Eukaryota; Stramenopiles; Stramenopiles_X; MAST; MAST-1; MAST-1C; MAST-1C_X; MAST-1C_X_sp.;
87	2341	Stramenopiles-MAST	MAST-9	Eukaryota; Stramenopiles; Stramenopiles_X; MAST; MAST-9; MAST-9A; MAST-9A_X; MAST-9A_X_sp.;
56	2076	Stramenopiles-MAST	MAST-3	Eukaryota; Stramenopiles; Stramenopiles_X; MAST; MAST-3; MAST-3A; MAST-3A_X; MAST-3A_X_sp.;
51	1998	Stramenopiles-MAST	MAST-7	Eukaryota; Stramenopiles; Stramenopiles_X; MAST; MAST-7; MAST-7D; MAST-7D_X; MAST-7D_X_sp.;
41	1750	Stramenopiles-MAST	MAST-3	Eukaryota; Stramenopiles; Stramenopiles_X; MAST; MAST-3; MAST-3J; MAST-3J_X; MAST-3J_X_sp.;
35	1528	Stramenopiles-MAST	MAST-7	Eukaryota; Stramenopiles; Stramenopiles_X; MAST; MAST-7; MAST-7B; MAST-7B_X; MAST-7B_X_sp.;
37	1367	Stramenopiles-MAST	MAST-2	Eukaryota; Stramenopiles; Stramenopiles_X; MAST; MAST-2; MAST-2A; MAST-2A_X; MAST-2A_X_sp.;
4	532	Stramenopiles-MAST	MAST-3	Eukaryota; Stramenopiles; Stramenopiles_X; MAST; MAST-3; MAST-3K; MAST-3K_X; MAST-3K_X_sp.;
32	350	Stramenopiles-MAST	MAST-3	Eukaryota; Stramenopiles; Stramenopiles_X; MAST; MAST-3; MAST-3D; MAST-3D_X; MAST-3D_X_sp.;
183	330	Stramenopiles-MAST	MAST-3	Eukaryota; Stramenopiles; Stramenopiles_X; MAST; MAST-3; MAST-3E; MAST-3E_X; MAST-3E_X_sp.;
0	219	Stramenopiles-MAST	MAST-2	Eukaryota; Stramenopiles; Stramenopiles_X; MAST; MAST-2; MAST-2D; MAST-2D_X; MAST-2D_X_sp.;
47	200	Stramenopiles-MAST	MAST-8	Eukaryota; Stramenopiles; Stramenopiles_X; MAST; MAST-8; MAST-8C; MAST-8C_X; MAST-8C_X_sp.;
0	136	Stramenopiles-MAST	MAST-3	Eukaryota; Stramenopiles; Stramenopiles_X; MAST; MAST-3; MAST-3C; MAST-3C_X; MAST-3C_X_sp.;
1	102	Stramenopiles-MAST	MAST-4	Eukaryota; Stramenopiles; Stramenopiles_X; MAST; MAST-4; MAST-4E; MAST-4E_X; MAST-4E_X_sp.;
33	100	Stramenopiles-MAST	MAST-1	Eukaryota; Stramenopiles; Stramenopiles_X; MAST; MAST-1; MAST-1A; MAST-1A_X; MAST-1A_X_sp.;
4	92	Stramenopiles-MAST	MAST-1	Eukaryota; Stramenopiles; Stramenopiles_X; MAST; MAST-1; MAST-1B; MAST-1B_X; MAST-1B_X_sp.;
8	78	Stramenopiles-MAST	MAST-3	Eukaryota; Stramenopiles; Stramenopiles_X; MAST; MAST-3; MAST-3F; MAST-3F_X; MAST-3F_X_sp.;
2	62	Stramenopiles-MAST	MAST-11	Eukaryota; Stramenopiles; Stramenopiles_X; MAST; MAST-11; MAST-11_X; MAST-11_XX; MAST-11_XX_sp.;
2	61	Stramenopiles-MAST	MAST-2	Eukaryota; Stramenopiles; Stramenopiles_X; MAST; MAST-2; MAST-2C; MAST-2C_X; MAST-2C_X_sp.;
22	60	Stramenopiles-MAST	MAST-8	Eukaryota; Stramenopiles; Stramenopiles_X; MAST; MAST-8; MAST-8B; MAST-8B_X; MAST-8B_X_sp.;
4	57	Stramenopiles-MAST	MAST-3	Eukaryota; Stramenopiles; Stramenopiles_X; MAST; MAST-3; MAST-3H; MAST-3H_X; MAST-3H_X_sp.;
24	55	Stramenopiles-MAST	MAST-9	Eukaryota; Stramenopiles; Stramenopiles_X; MAST; MAST-9; MAST-9C; MAST-9C_X; MAST-9C_X_sp.;
7	52	Stramenopiles-MAST	MAST-25	Eukaryota; Stramenopiles; Stramenopiles_X; MAST; MAST-25; MAST-25_X; MAST-25_XX; MAST-25_XX_sp.;
0	37	Stramenopiles-MAST	MAST-7	Eukaryota; Stramenopiles; Stramenopiles_X; MAST; MAST-7; MAST-7E; MAST-7E_X; MAST-7E_X_sp.;
2	26	Stramenopiles-MAST	MAST-9	Eukaryota; Stramenopiles; Stramenopiles_X; MAST; MAST-9; MAST-9D; MAST-9D_X; MAST-9D_X_sp.;
0	19	Stramenopiles-MAST	MAST-4	Eukaryota; Stramenopiles; Stramenopiles_X; MAST; MAST-4; MAST-4C; MAST-4C_X; MAST-4C_X_sp.;
1	15	Stramenopiles-MAST	MAST-7	Eukaryota; Stramenopiles; Stramenopiles_X; MAST; MAST-7; MAST-7_X; MAST-7_XX; MAST-7_XX_sp.;
1	6	Stramenopiles-MAST	MAST-10	Eukaryota; Stramenopiles; Stramenopiles_X; MAST; MAST-10; MAST-10_X; MAST-10_XX; MAST-10_XX_sp.;
2	5	Stramenopiles-MAST	MAST-4	Eukaryota; Stramenopiles; Stramenopiles_X; MAST; MAST-4; MAST-4F; MAST-4F_X; MAST-4F_X_sp.;
0	4	Stramenopiles-MAST	MAST-2	Eukaryota; Stramenopiles; Stramenopiles_X; MAST; MAST-2; MAST-2B; MAST-2B_X; MAST-2B_X_sp.;
1	4	Stramenopiles-MAST	MAST-4	Eukaryota; Stramenopiles; Stramenopiles_X; MAST; MAST-4; MAST-4B; MAST-4B_X; MAST-4B_X_sp.;
0	0	Stramenopiles-MAST	MAST-4	Eukaryota; Stramenopiles; Stramenopiles_X; MAST; MAST-4; MAST-4D; MAST-4D_X; MAST-4D_X_sp.;
177	18848	Stramenopiles-Other	Pedinellales	Eukaryota; Stramenopiles; Ochrophyta; Dictyochophyceae; Dictyochophyceae_X; Pedinellales; Pedinellales_X; Pedinellales_X_sp.;
175	12246	Stramenopiles-Other	MOCH-2	Eukaryota; Stramenopiles; Stramenopiles_X; MOCH; MOCH-2; MOCH-2_X; MOCH-2_XX; MOCH-2_XX_sp.;
420	4586	Stramenopiles-Other	Florenciellales	Eukaryota; Stramenopiles; Ochrophyta; Dictyochophyceae; Dictyochophyceae_X; Florenciellales; Florenciellales_X; Florenciellales_X_sp.;
77	2395	Stramenopiles-Other	Dictyochales	Eukaryota; Stramenopiles; Ochrophyta; Dictyochophyceae; Dictyochophyceae_X; Dictyochales; Dictyochales_X; Dictyochales_X_sp.;
2117	1248	Stramenopiles-Other	Aplanochytrium	Eukaryota; Stramenopiles; Stramenopiles_X; Labyrinthulea; Labyrinthulales; Labyrinthulaceae; Aplanochytrium; Aplanochytrium_sp.;
25	1189	Stramenopiles-Other	Triparma	Eukaryota; Stramenopiles; Ochrophyta; Bolidophyceae; Parmales; Triparmaceae; Triparma; Triparma_eleuthera;
48	775	Stramenopiles-Other	Rhizochromulinales	Eukaryota; Stramenopiles; Ochrophyta; Dictyochophyceae; Dictyochophyceae_X; Rhizochromulinales; Rhizochromulinales_X; Rhizochromulinales_X_sp.;
78	752	Stramenopiles-Other	StramenopilesXX	Eukaryota; Stramenopiles; Stramenopiles_X; Stramenopiles_XX; Stramenopiles_XXX; Stramenopiles_XXXX; Stramenopiles_XXXXX; Stramenopiles_XXXXX_sp.;
486	495	Stramenopiles-Other	Dictyocha	Eukaryota; Stramenopiles; Ochrophyta; Dictyochophyceae; Dictyochophyceae_X; Dictyochales; Dictyocha; Dictyocha_globosa;
386	495	Stramenopiles-Other	MOCH-5	Eukaryota; Stramenopiles; Stramenopiles_X; MOCH; MOCH-5; MOCH-5_X; MOCH-5_XX; MOCH-5_XX_sp.;
63	465	Stramenopiles-Other	Pseudochattonella	Eukaryota; Stramenopiles; Ochrophyta; Dictyochophyceae; Dictyochophyceae_X; Florenciellales; Pseudochattonella; Pseudochattonella_sp.;
100	257	Stramenopiles-Other	Thraustochytriaceae	Eukaryota; Stramenopiles; Stramenopiles_X; Labyrinthulea; Thraustochytriales; Thraustochytriaceae; Thraustochytriaceae_X; Thraustochytriaceae_X_sp.;
29	170	Stramenopiles-Other	Labyrinthulaceae	Eukaryota; Stramenopiles; Stramenopiles_X; Labyrinthulea; Labyrinthulales; Labyrinthulaceae; Labyrinthulaceae_X; Labyrinthulaceae_X_sp.;
14	49	Stramenopiles-Other	Heterosigma	Eukaryota; Stramenopiles; Ochrophyta; Raphidophyceae; Raphidophyceae_X; Raphidophyceae_XX; Heterosigma; Heterosigma_akashiwo;
0	33	Stramenopiles-Other	Dictyochophyceae	Eukaryota; Stramenopiles; Ochrophyta; Dictyochophyceae; Dictyochophyceae_X; Dictyochophyceae_XX; Dictyochophyceae_XXX; Dictyochophyceae_XXX_sp.;
10	17	Stramenopiles-Other	Pinguiochrysis	Eukaryota; Stramenopiles; Ochrophyta; Pinguiophyceae; Pinguiochrysidales; Pinguiochrysidaceae; Pinguiochrysis; Pinguiochrysis_pyriformis;
0	12	Stramenopiles-Other	Bicoecaceae	Eukaryota; Stramenopiles; Stramenopiles_X; Bicoecea; Bicoecales; Bicoecaceae; Bicoecaceae_X; Bicoecaceae_X_sp.;
2	7	Stramenopiles-Other	MOCH-4	Eukaryota; Stramenopiles; Stramenopiles_X; MOCH; MOCH-4; MOCH-4_X; MOCH-4_XX; MOCH-4_XX_sp.;
93	7	Stramenopiles-Other	Pseudochattonella	Eukaryota; Stramenopiles; Ochrophyta; Dictyochophyceae; Dictyochophyceae_X; Florenciellales; Pseudochattonella; Pseudochattonella_farcimen;
8	6	Stramenopiles-Other	Pseudochattonella	Eukaryota; Stramenopiles; Ochrophyta; Dictyochophyceae; Dictyochophyceae_X; Florenciellales; Pseudochattonella; Pseudochattonella_verruculosa;
0	4	Stramenopiles-Other	Pseudochatonella	Eukaryota; Stramenopiles; Ochrophyta; Dictyochophyceae; Dictyochophyceae_X; Florenciellales; Pseudochatonella; Pseudochatonella_sp.;
2	3	Stramenopiles-Other	Blastocystis	Eukaryota; Stramenopiles; Stramenopiles_X; Opalinata; Opalinata_X; Blastocystis-Group; Blastocystis; Blastocystis_sp.;
1	2	Stramenopiles-Other	Dictyocha	Eukaryota; Stramenopiles; Ochrophyta; Dictyochophyceae; Dictyochophyceae_X; Dictyochales; Dictyocha; Dictyocha_octonaria;
1	2	Stramenopiles-Other	Labyrinthuloides	Eukaryota; Stramenopiles; Stramenopiles_X; Labyrinthulea; Thraustochytriales; Thraustochytriaceae; Labyrinthuloides; Labyrinthuloides_minuta;
11	1	Stramenopiles-Other	Blastocystis	Eukaryota; Stramenopiles; Stramenopiles_X; Opalinata; Opalinata_X; Blastocystis-Group; Blastocystis; Blastocystis_hominis;
1	1	Stramenopiles-Other	Triparma	Eukaryota; Stramenopiles; Ochrophyta; Bolidophyceae; Parmales; Triparmaceae; Triparma; Triparma_mediterranea;
1	0	Stramenopiles-Other	Bicosoeca	Eukaryota; Stramenopiles; Stramenopiles_X; Bicoecea; Bicoecales; Bicoecaceae; Bicosoeca; Bicosoeca_vacillans;
82	1917	Stramenopiles-Pelagophytes	Pelagomonadaceae_clade_A	Eukaryota; Stramenopiles; Ochrophyta; Pelagophyceae; Pelagomonadales; Pelagomonadaceae; Pelagomonadaceae_clade_A; Pelagomonadaceae_clade_A_sp.;
107	1526	Stramenopiles-Pelagophytes	Pelagophyceae	Eukaryota; Stramenopiles; Ochrophyta; Pelagophyceae; Pelagophyceae_X; Pelagophyceae_XX; Pelagophyceae_XXX; Pelagophyceae_XXX_sp.;
35	761	Stramenopiles-Pelagophytes	Pelagococcus	Eukaryota; Stramenopiles; Ochrophyta; Pelagophyceae; Pelagomonadales; Pelagomonadaceae; Pelagococcus; Pelagococcus_subviridis;
4	48	Stramenopiles-Pelagophytes	Sarcinochrysis	Eukaryota; Stramenopiles; Ochrophyta; Pelagophyceae; Sarcinochrysidales; Sarcinochrysidaceae; Sarcinochrysis; Sarcinochrysis_sp.;
0	31	Stramenopiles-Pelagophytes	Aureococcus	Eukaryota; Stramenopiles; Ochrophyta; Pelagophyceae; Pelagomonadales; Pelagomonadaceae; Aureococcus; Aureococcus_anophagefferens;
0	17	Stramenopiles-Pelagophytes	Pelagomonadaceae	Eukaryota; Stramenopiles; Ochrophyta; Pelagophyceae; Pelagomonadales; Pelagomonadaceae; Pelagomonadaceae_X; Pelagomonadaceae_X_sp.;
1	12	Stramenopiles-Pelagophytes	Pelagomonas	Eukaryota; Stramenopiles; Ochrophyta; Pelagophyceae; Pelagomonadales; Pelagomonadaceae; Pelagomonas; Pelagomonas_calceolata;
1	0	Stramenopiles-Pelagophytes	Sarcinochrysidaceae	Eukaryota; Stramenopiles; Ochrophyta; Pelagophyceae; Sarcinochrysidales; Sarcinochrysidaceae; Sarcinochrysidaceae_X; Sarcinochrysidaceae_X_sp.;
194908	334528	Unassigned	Other-unclassified	None
