# Supplementary material
Source: Frontiers journal article supplement (https://www.frontiersin.org/articles/412501)
Supplement: Table_4.XLSX [file Table_4.XLSX]

## Sheet: TableS4
Table S4.
Pair	OTU.IDA	Taxa_A	Taxa2_A	PR2_A	OTU.IDB	Taxa_B	Taxa2_B	PR2_B	LS	lowCI	upCI	Xs	Ys	Len	Delay	P	PCC	Ppcc	SPCC	Pspcc	Dspcc	SCC	Pscc	SSCC	Psscc	Dsscc	Q	Qpcc	Qspcc	Qscc	Qsscc	Xi	Yi
Alveolates-Dinoflagellates_Stramenopiles-MAST	AB284159.1.1765_U	Alveolates-Dinoflagellates	Protoperidinium	Eukaryota; Alveolata; Dinophyta; Dinophyceae; Dinophyceae_X; Dinophyceae_XX; Protoperidinium; Protoperidinium_bipes;	JQ782080.1.1737_U	Stramenopiles-MAST	MAST-3	Eukaryota; Stramenopiles; Stramenopiles_X; MAST; MAST-3; MAST-3I; MAST-3I_X; MAST-3I_X_sp.;	-0.619583	-0.619583	-0.619583	2	1	18	1	0.018	-0.415786	0.076643	-0.653198	0.006075	3	-0.39965	0.090026	-0.657773	0.005613	3	0.094526	0.137559	2e-06	0.161103	2e-06	1	13
Alveolates-Dinoflagellates_Stramenopiles-Chrysophytes	AB284159.1.1765_U	Alveolates-Dinoflagellates	Protoperidinium	Eukaryota; Alveolata; Dinophyta; Dinophyceae; Dinophyceae_X; Dinophyceae_XX; Protoperidinium; Protoperidinium_bipes;	KC583138.1.1098_U	Stramenopiles-Chrysophytes	Chrysophyceae_Clade-H	Eukaryota; Stramenopiles; Ochrophyta; Chrysophyceae; Chrysophyceae_X; Chrysophyceae_Clade-H; Chrysophyceae_Clade-H_X; Chrysophyceae_Clade-H_X_sp.;	0.608984	0.608984	0.608984	1	1	18	0	0.014	0.474715	0.039999	0.564308	0.044537	-6	0.54833	0.015065	0.626971	0.029113	7	0.081741	0.091932	6e-06	0.04942	5e-06	1	20
Alveolates-Dinoflagellates_Stramenopiles-MAST	AB284159.1.1765_U	Alveolates-Dinoflagellates	Protoperidinium	Eukaryota; Alveolata; Dinophyta; Dinophyceae; Dinophyceae_X; Dinophyceae_XX; Protoperidinium; Protoperidinium_bipes;	JQ782004.1.1784_U	Stramenopiles-MAST	MAST-1	Eukaryota; Stramenopiles; Stramenopiles_X; MAST; MAST-1; MAST-1C; MAST-1C_X; MAST-1C_X_sp.;	-0.607311	-0.607311	-0.607311	2	1	18	1	0.026	-0.56287	0.012105	-0.700384	0.011193	-7	-0.52109	0.022149	-0.638573	0.004341	1	0.116273	0.041835	3e-06	0.064013	2e-06	1	37
Alveolates-Dinoflagellates_Stramenopiles-MAST	AB284159.1.1765_U	Alveolates-Dinoflagellates	Protoperidinium	Eukaryota; Alveolata; Dinophyta; Dinophyceae; Dinophyceae_X; Dinophyceae_XX; Protoperidinium; Protoperidinium_bipes;	AB771842.1.1677_U	Stramenopiles-MAST	MAST-2	Eukaryota; Stramenopiles; Stramenopiles_X; MAST; MAST-2; MAST-2A; MAST-2A_X; MAST-2A_X_sp.;	-0.566911	-0.566911	-0.566911	3	1	17	2	0.046	-0.33051	0.166953	-0.6227	0.007588	2	-0.32686	0.171973	-0.620531	0.007864	2	0.154843	0.221831	2e-06	0.24206	3e-06	1	49
Alveolates-Dinoflagellates_Stramenopiles-MAST	AB284159.1.1765_U	Alveolates-Dinoflagellates	Protoperidinium	Eukaryota; Alveolata; Dinophyta; Dinophyceae; Dinophyceae_X; Dinophyceae_XX; Protoperidinium; Protoperidinium_bipes;	JQ782035.1.1781_U	Stramenopiles-MAST	MAST-3	Eukaryota; Stramenopiles; Stramenopiles_X; MAST; MAST-3; MAST-3I; MAST-3I_X; MAST-3I_X_sp.;	-0.587283	-0.587283	-0.587283	4	1	16	3	0.038	0.059785	0.80791	-0.647714	0.006668	3	0.054458	0.824763	-0.855564	2.4e-05	3	0.141376	0.527002	2e-06	0.573402	0	1	68
Alveolates-Dinoflagellates_Alveolates-Dinoflagellates	AB284159.1.1765_U	Alveolates-Dinoflagellates	Protoperidinium	Eukaryota; Alveolata; Dinophyta; Dinophyceae; Dinophyceae_X; Dinophyceae_XX; Protoperidinium; Protoperidinium_bipes;	HM561067.1.974_U	Alveolates-Dinoflagellates	Dinophyceae	Eukaryota; Alveolata; Dinophyta; Dinophyceae; Dinophyceae_X; Dinophyceae_XX; Dinophyceae_XXX; Dinophyceae_XXX_sp.;	0.584391	0.584391	0.584391	2	2	18	0	0.037	0.595048	0.007197	0.595048	0.007197	0	0.532924	0.018805	0.569956	0.021166	3	0.139515	0.030045	2e-06	0.057465	4e-06	1	71
Alveolates-Dinoflagellates_Alveolates-Ciliates	AB284159.1.1765_U	Alveolates-Dinoflagellates	Protoperidinium	Eukaryota; Alveolata; Dinophyta; Dinophyceae; Dinophyceae_X; Dinophyceae_XX; Protoperidinium; Protoperidinium_bipes;	JX567497.1.1529_U	Alveolates-Ciliates	Spirotrichea	Eukaryota; Alveolata; Ciliophora; Spirotrichea; Tintinnida; Tintinnidae; Steenstrupiella; Steenstrupiella_steenstrupii;	0.594883	0.594883	0.594883	3	2	17	1	0.026	0.5022	0.028443	0.613303	0.033939	-7	0.464145	0.045298	0.529828	0.076438	-7	0.116273	0.073822	5e-06	0.103425	8e-06	1	85
Alveolates-Dinoflagellates_Alveolates-Syndiniales	AB284159.1.1765_U	Alveolates-Dinoflagellates	Protoperidinium	Eukaryota; Alveolata; Dinophyta; Dinophyceae; Dinophyceae_X; Dinophyceae_XX; Protoperidinium; Protoperidinium_bipes;	EU793278.1.1575_U	Alveolates-Syndiniales	Dino-Group-II	Eukaryota; Alveolata; Dinophyta; Syndiniales; Dino-Group-II; Dino-Group-II-Clade-6; Dino-Group-II-Clade-6_X; Dino-Group-II-Clade-6_X_sp.;	0.72112	0.72112	0.72112	3	1	17	2	0.001	0.230852	0.341667	0.66848	0.003351	2	0.239877	0.322586	0.857406	1.1e-05	2	0.017494	0.336515	2e-06	0.352234	0	1	109
Alveolates-Dinoflagellates_Stramenopiles-Other	AB284159.1.1765_U	Alveolates-Dinoflagellates	Protoperidinium	Eukaryota; Alveolata; Dinophyta; Dinophyceae; Dinophyceae_X; Dinophyceae_XX; Protoperidinium; Protoperidinium_bipes;	EF695169.1.817_U	Stramenopiles-Other	Florenciellales	Eukaryota; Stramenopiles; Ochrophyta; Dictyochophyceae; Dictyochophyceae_X; Florenciellales; Florenciellales_X; Florenciellales_X_sp.;	-0.626128	-0.626128	-0.626128	3	3	17	0	0.019	-0.48477	0.035415	-0.687175	0.006621	-5	-0.533597	0.018627	-0.617582	0.018605	-5	0.097312	0.085019	2e-06	0.057145	4e-06	1	121
Alveolates-Dinoflagellates_Alveolates-Ciliates	AB284159.1.1765_U	Alveolates-Dinoflagellates	Protoperidinium	Eukaryota; Alveolata; Dinophyta; Dinophyceae; Dinophyceae_X; Dinophyceae_XX; Protoperidinium; Protoperidinium_bipes;	KJ759417.1.1743_U	Alveolates-Ciliates	Spirotrichea	Eukaryota; Alveolata; Ciliophora; Spirotrichea; Choreotrichida; Leegaardiellidae_B; Leegaardiella; Leegaardiella_sp.;	0.635953	0.635953	0.635953	1	1	18	0	0.01	0.562469	0.01218	-0.635556	0.010887	-4	0.648483	0.002671	0.648483	0.002671	0	0.067958	0.041983	3e-06	0.01495	1e-06	1	124
Alveolates-Dinoflagellates_Haptophytes	AB284159.1.1765_U	Alveolates-Dinoflagellates	Protoperidinium	Eukaryota; Alveolata; Dinophyta; Dinophyceae; Dinophyceae_X; Dinophyceae_XX; Protoperidinium; Protoperidinium_bipes;	HG970975	Haptophytes	Haptophyta	Eukaryota; Hacrobia; Haptophyta; Haptophyta_X; Haptophyta_XX; Haptophyta_XXX; Haptophyta_XXXX; Haptophyta_XXXX_sp.;	-0.601798	-0.601798	-0.601798	2	1	18	1	0.028	-0.572864	0.010356	-0.786709	0.00142	-6	-0.526131	0.020672	-0.714286	0.006088	-6	0.120985	0.038146	1e-06	0.061111	2e-06	1	126
Alveolates-Dinoflagellates_Cryptophytes	AB284159.1.1765_U	Alveolates-Dinoflagellates	Protoperidinium	Eukaryota; Alveolata; Dinophyta; Dinophyceae; Dinophyceae_X; Dinophyceae_XX; Protoperidinium; Protoperidinium_bipes;	GQ863814.1.1651_U	Cryptophytes	Other-unclassified	Eukaryota; Hacrobia; Cryptophyta; Cryptophyceae; Cryptophyceae_X; Goniomonadales; Goniomonas; Goniomonas_sp.;	-0.632455	-0.632455	-0.632455	3	3	17	0	0.013	-0.5979	0.006855	-0.597954	0.023909	-5	-0.591568	0.007633	-0.648352	0.012144	-5	0.078309	0.029097	4e-06	0.030645	3e-06	1	146
Alveolates-Dinoflagellates_Sal	AB284159.1.1765_U	Alveolates-Dinoflagellates	Protoperidinium	Eukaryota; Alveolata; Dinophyta; Dinophyceae; Dinophyceae_X; Dinophyceae_XX; Protoperidinium; Protoperidinium_bipes;	Sal	Sal	NA	NA	-0.617505	-0.617505	-0.617505	2	2	18	0	0.023	-0.541315	0.016686	-0.701489	0.001178	-1	-0.56348	0.011992	-0.58105	0.011444	-1	0.108834	0.051406	1e-06	0.042195	3e-06	1	203
Alveolates-Dinoflagellates_DO	AB284159.1.1765_U	Alveolates-Dinoflagellates	Protoperidinium	Eukaryota; Alveolata; Dinophyta; Dinophyceae; Dinophyceae_X; Dinophyceae_XX; Protoperidinium; Protoperidinium_bipes;	DO	DO	NA	NA	-0.604405	-0.604405	-0.604405	1	1	19	0	0.022	-0.61147	0.005405	-0.777403	0.001762	6	-0.606673	0.005886	-0.796146	0.001129	6	0.106234	0.024919	1e-06	0.02559	1e-06	1	204
Alveolates-Dinoflagellates_Chl	AB284159.1.1765_U	Alveolates-Dinoflagellates	Protoperidinium	Eukaryota; Alveolata; Dinophyta; Dinophyceae; Dinophyceae_X; Dinophyceae_XX; Protoperidinium; Protoperidinium_bipes;	Chl	Chl	NA	NA	-0.588306	-0.588306	-0.588306	3	5	15	-2	0.033	0.101888	0.678103	-0.729001	0.0009	-2	0.085162	0.728859	-0.683436	0.00249	-2	0.131118	0.482905	1e-06	0.540379	1e-06	1	205
Alveolates-Ciliates_Stramenopiles-MAST	HQ867080.1.873_U	Alveolates-Ciliates	Spirotrichea	Eukaryota; Alveolata; Ciliophora; Spirotrichea; Strombidiida_E; Strombidiida_E_X; Strombidiida_E_XX; Strombidiida_E_XX_sp.;	JQ781989.1.1805_U	Stramenopiles-MAST	MAST-4	Eukaryota; Stramenopiles; Stramenopiles_X; MAST; MAST-4; MAST-4A; MAST-4A_X; MAST-4A_X_sp.;	-0.667992	-0.667992	-0.667992	8	1	9	7	0.025	0.050408	0.837622	-0.635913	0.004558	1	0.032485	0.89497	-0.721542	0.008074	7	0.113584	0.535176	2e-06	0.595604	3e-06	2	31
Alveolates-Ciliates_Alveolates-Syndiniales	HQ867080.1.873_U	Alveolates-Ciliates	Spirotrichea	Eukaryota; Alveolata; Ciliophora; Spirotrichea; Strombidiida_E; Strombidiida_E_X; Strombidiida_E_XX; Strombidiida_E_XX_sp.;	KF130214.1.1759_U	Alveolates-Syndiniales	Dino-Group-II	Eukaryota; Alveolata; Dinophyta; Syndiniales; Dino-Group-II; Dino-Group-II-Clade-10-and-11; Dino-Group-II-Clade-10-and-11_X; Dino-Group-II-Clade-10-and-11_X_sp.;	-0.712607	-0.712607	-0.712607	4	3	16	1	0.006	0.057362	0.815567	-0.705155	0.001081	1	0.16894	0.489317	-0.694979	0.001368	1	0.050667	0.528823	1e-06	0.441749	1e-06	2	33
Alveolates-Ciliates_Alveolates-Syndiniales	HQ867080.1.873_U	Alveolates-Ciliates	Spirotrichea	Eukaryota; Alveolata; Ciliophora; Spirotrichea; Strombidiida_E; Strombidiida_E_X; Strombidiida_E_XX; Strombidiida_E_XX_sp.;	AACY020102112.1.1515_U	Alveolates-Syndiniales	Dino-Group-II	Eukaryota; Alveolata; Dinophyta; Syndiniales; Dino-Group-II; Dino-Group-II-Clade-16; Dino-Group-II-Clade-16_X; Dino-Group-II-Clade-16_X_sp.;	0.655119	0.655119	0.655119	7	1	10	6	0.027	0.478647	0.038155	0.675592	0.011264	6	0.615283	0.005047	0.69697	0.008108	6	0.118689	0.089324	3e-06	0.022874	3e-06	2	44
Alveolates-Ciliates_Alveolates-Ciliates	HQ867080.1.873_U	Alveolates-Ciliates	Spirotrichea	Eukaryota; Alveolata; Ciliophora; Spirotrichea; Strombidiida_E; Strombidiida_E_X; Strombidiida_E_XX; Strombidiida_E_XX_sp.;	AY665090.1.1708_U	Alveolates-Ciliates	Colpodea	Eukaryota; Alveolata; Ciliophora; Colpodea; Colpodea-1; Colpodea-1_X; Colpodea-1_XX; Colpodea-1_XX_sp.;	-0.645063	-0.645063	-0.645063	7	2	10	5	0.039	0.496962	0.030414	-0.742072	0.002374	5	0.504403	0.027644	-0.679162	0.007557	5	0.143381	0.077173	1e-06	0.074396	2e-06	2	47
Alveolates-Ciliates_Stramenopiles-MAST	HQ867080.1.873_U	Alveolates-Ciliates	Spirotrichea	Eukaryota; Alveolata; Ciliophora; Spirotrichea; Strombidiida_E; Strombidiida_E_X; Strombidiida_E_XX; Strombidiida_E_XX_sp.;	KF129607.1.1760_U	Stramenopiles-MAST	MAST-7	Eukaryota; Stramenopiles; Stramenopiles_X; MAST; MAST-7; MAST-7D; MAST-7D_X; MAST-7D_X_sp.;	0.698191	0.698191	0.698191	7	2	12	5	0.014	0.003617	0.988274	-0.673079	0.016443	7	-0.011868	0.96154	0.707828	0.004621	5	0.081741	0.575327	3e-06	0.612511	2e-06	2	90
Alveolates-Ciliates_Alveolates-Ciliates	HQ867080.1.873_U	Alveolates-Ciliates	Spirotrichea	Eukaryota; Alveolata; Ciliophora; Spirotrichea; Strombidiida_E; Strombidiida_E_X; Strombidiida_E_XX; Strombidiida_E_XX_sp.;	EU500001.1.814_U	Alveolates-Ciliates	Spirotrichea	Eukaryota; Alveolata; Ciliophora; Spirotrichea; Choreotrichida; Strobilidiidae_I; Pelagostrobilidium; Pelagostrobilidium_sp.;	-0.684516	-0.684516	-0.684516	2	5	15	-3	0.015	0.009222	0.970111	-0.779113	0.000375	-3	0	1	-0.837997	5.1e-05	-3	0.085181	0.570911	1e-06	0.62342	0	2	105
Alveolates-Ciliates_Stramenopiles-Diatoms	HQ867080.1.873_U	Alveolates-Ciliates	Spirotrichea	Eukaryota; Alveolata; Ciliophora; Spirotrichea; Strombidiida_E; Strombidiida_E_X; Strombidiida_E_XX; Strombidiida_E_XX_sp.;	AY256270.1.1308_U	Stramenopiles-Diatoms	Araphid-pennate	Eukaryota; Stramenopiles; Ochrophyta; Bacillariophyta; Bacillariophyta_X; Araphid-pennate; Araphid-pennate_X; Araphid-pennate_X_sp.;	0.726976	0.726976	0.726976	7	2	12	5	0.002	-0.017098	0.944614	0.699406	0.005369	5	-0.001755	0.99431	0.756876	0.001725	5	0.026563	0.563865	2e-06	0.621667	1e-06	2	112
Alveolates-Ciliates_Rhizaria-Acantharia	HQ867080.1.873_U	Alveolates-Ciliates	Spirotrichea	Eukaryota; Alveolata; Ciliophora; Spirotrichea; Strombidiida_E; Strombidiida_E_X; Strombidiida_E_XX; Strombidiida_E_XX_sp.;	JN811185.1.1695_U	Rhizaria-Acantharia	Lychnaspis	Eukaryota; Rhizaria; Radiolaria; Acantharea; Arthracanthida-Symphyacanthida; Arthracanthida-Symphyacanthida_X; Lychnaspis; Lychnaspis_giltschi;	0.636284	0.636284	0.636284	1	7	13	-6	0.039	0.473006	0.040822	0.797224	0.001099	-6	0.348398	0.143797	0.866576	0.000127	-6	0.143381	0.093077	1e-06	0.216558	0	2	114
Alveolates-Ciliates_Stramenopiles-Other	HQ867080.1.873_U	Alveolates-Ciliates	Spirotrichea	Eukaryota; Alveolata; Ciliophora; Spirotrichea; Strombidiida_E; Strombidiida_E_X; Strombidiida_E_XX; Strombidiida_E_XX_sp.;	EU500084.1.817_U	Stramenopiles-Other	MOCH-2	Eukaryota; Stramenopiles; Stramenopiles_X; MOCH; MOCH-2; MOCH-2_X; MOCH-2_XX; MOCH-2_XX_sp.;	-0.653734	-0.653734	-0.653734	8	1	9	7	0.028	0.06764	0.783213	-0.874816	0.000196	7	0.14129	0.563963	-0.830124	0.000831	7	0.120985	0.519858	0	0.476418	1e-06	2	144
Alveolates-Dinoflagellates_Alveolates-Ciliates	HM749923.1.1468_U	Alveolates-Dinoflagellates	Dinophyceae	Eukaryota; Alveolata; Dinophyta; Dinophyceae; Dinophyceae_X; Dinophyceae_XX; Dinophyceae_XXX; Dinophyceae_XXX_sp.;	KF130495.1.1710_U	Alveolates-Ciliates	Colpodea	Eukaryota; Alveolata; Ciliophora; Colpodea; Colpodea-1; Colpodea-1_X; Colpodea-1_XX; Colpodea-1_XX_sp.;	0.620759	0.620759	0.620759	2	2	18	0	0.033	0.418825	0.074297	0.667192	0.01273	-6	0.653796	0.002396	0.686275	0.001661	1	0.131118	0.134901	3e-06	0.013951	1e-06	3	4
Alveolates-Dinoflagellates_Alveolates-Dinoflagellates	HM749923.1.1468_U	Alveolates-Dinoflagellates	Dinophyceae	Eukaryota; Alveolata; Dinophyta; Dinophyceae; Dinophyceae_X; Dinophyceae_XX; Dinophyceae_XXX; Dinophyceae_XXX_sp.;	GU825088.1.1075_U	Alveolates-Dinoflagellates	Dinophyceae	Eukaryota; Alveolata; Dinophyta; Dinophyceae; Dinophyceae_X; Dinophyceae_XX; Dinophyceae_XXX; Dinophyceae_XXX_sp.;	0.806033	0.806033	0.806033	1	1	19	0	0	0.862727	2e-06	0.862727	2e-06	0	0.84423	5e-06	0.84423	5e-06	0	0	0.000129	0	0.000265	0	3	6
Alveolates-Dinoflagellates_Alveolates-Dinoflagellates	HM749923.1.1468_U	Alveolates-Dinoflagellates	Dinophyceae	Eukaryota; Alveolata; Dinophyta; Dinophyceae; Dinophyceae_X; Dinophyceae_XX; Dinophyceae_XXX; Dinophyceae_XXX_sp.;	EF527080.1.1343_U	Alveolates-Dinoflagellates	Dinophyceae	Eukaryota; Alveolata; Dinophyta; Dinophyceae; Dinophyceae_X; Dinophyceae_XX; Dinophyceae_XXX; Dinophyceae_XXX_sp.;	0.713038	0.713038	0.713038	1	1	19	0	0.002	0.734386	0.000343	0.734386	0.000343	0	0.766126	0.000131	0.766126	0.000131	0	0.026563	0.004016	0	0.002012	0	3	9
Alveolates-Dinoflagellates_Alveolates-Ciliates	HM749923.1.1468_U	Alveolates-Dinoflagellates	Dinophyceae	Eukaryota; Alveolata; Dinophyta; Dinophyceae; Dinophyceae_X; Dinophyceae_XX; Dinophyceae_XXX; Dinophyceae_XXX_sp.;	KJ763611.1.1765_U	Alveolates-Ciliates	Oligohymenophorea	Eukaryota; Alveolata; Ciliophora; Oligohymenophorea; Scuticociliatia; Scuticociliatia-1; Scuticociliatia-1_X; Scuticociliatia-1_X_sp.;	-0.655145	-0.655145	-0.655145	1	2	18	-1	0.013	-0.630294	0.003818	-0.694667	0.001378	-1	-0.656277	0.002276	-0.728962	0.000599	-1	0.078309	0.01994	1e-06	0.01349	1e-06	3	10
Alveolates-Dinoflagellates_Stramenopiles-MAST	HM749923.1.1468_U	Alveolates-Dinoflagellates	Dinophyceae	Eukaryota; Alveolata; Dinophyta; Dinophyceae; Dinophyceae_X; Dinophyceae_XX; Dinophyceae_XXX; Dinophyceae_XXX_sp.;	JQ782080.1.1737_U	Stramenopiles-MAST	MAST-3	Eukaryota; Stramenopiles; Stramenopiles_X; MAST; MAST-3; MAST-3I; MAST-3I_X; MAST-3I_X_sp.;	0.607014	0.607014	0.607014	1	1	19	0	0.033	0.536866	0.017784	0.536866	0.017784	0	0.687837	0.001134	0.687837	0.001134	0	0.131118	0.053569	4e-06	0.008383	1e-06	3	13
Alveolates-Dinoflagellates_Alveolates-Dinoflagellates	HM749923.1.1468_U	Alveolates-Dinoflagellates	Dinophyceae	Eukaryota; Alveolata; Dinophyta; Dinophyceae; Dinophyceae_X; Dinophyceae_XX; Dinophyceae_XXX; Dinophyceae_XXX_sp.;	GU823943.1.1199_U	Alveolates-Dinoflagellates	Dinophyceae	Eukaryota; Alveolata; Dinophyta; Dinophyceae; Dinophyceae_X; Dinophyceae_XX; Dinophyceae_XXX; Dinophyceae_XXX_sp.;	0.63132	0.63132	0.63132	1	2	18	-1	0.016	0.357636	0.132761	0.606844	0.007575	-1	0.433282	0.063861	0.607027	0.007552	-1	0.088365	0.193212	2e-06	0.129631	2e-06	3	14
Alveolates-Dinoflagellates_Stramenopiles-Other	HM749923.1.1468_U	Alveolates-Dinoflagellates	Dinophyceae	Eukaryota; Alveolata; Dinophyta; Dinophyceae; Dinophyceae_X; Dinophyceae_XX; Dinophyceae_XXX; Dinophyceae_XXX_sp.;	EU500162.1.816_U	Stramenopiles-Other	Florenciellales	Eukaryota; Stramenopiles; Ochrophyta; Dictyochophyceae; Dictyochophyceae_X; Florenciellales; Florenciellales_X; Florenciellales_X_sp.;	0.630322	0.630322	0.630322	1	1	19	0	0.018	0.727643	0.000414	0.727643	0.000414	0	0.705076	0.000747	0.705076	0.000747	0	0.094526	0.004517	1e-06	0.006319	1e-06	3	15
Alveolates-Dinoflagellates_Stramenopiles-Chrysophytes	HM749923.1.1468_U	Alveolates-Dinoflagellates	Dinophyceae	Eukaryota; Alveolata; Dinophyta; Dinophyceae; Dinophyceae_X; Dinophyceae_XX; Dinophyceae_XXX; Dinophyceae_XXX_sp.;	AY129065.1.1781_U	Stramenopiles-Chrysophytes	Chrysophyceae_Clade-H	Eukaryota; Stramenopiles; Ochrophyta; Chrysophyceae; Chrysophyceae_X; Chrysophyceae_Clade-H; Chrysophyceae_Clade-H_X; Chrysophyceae_Clade-H_X_sp.;	-0.727707	-0.727707	-0.727707	3	3	16	0	0.001	-0.764338	0.000139	-0.764338	0.000139	0	-0.694469	0.000969	-0.694469	0.000969	0	0.017494	0.002161	0	0.007521	1e-06	3	16
Alveolates-Dinoflagellates_Stramenopiles-Chrysophytes	HM749923.1.1468_U	Alveolates-Dinoflagellates	Dinophyceae	Eukaryota; Alveolata; Dinophyta; Dinophyceae; Dinophyceae_X; Dinophyceae_XX; Dinophyceae_XXX; Dinophyceae_XXX_sp.;	KC583138.1.1098_U	Stramenopiles-Chrysophytes	Chrysophyceae_Clade-H	Eukaryota; Stramenopiles; Ochrophyta; Chrysophyceae; Chrysophyceae_X; Chrysophyceae_Clade-H; Chrysophyceae_Clade-H_X; Chrysophyceae_Clade-H_X_sp.;	-0.601587	-0.601587	-0.601587	1	2	17	-1	0.048	-0.409664	0.081535	-0.684761	0.001717	-1	-0.429513	0.066469	-0.621978	0.01755	5	0.158724	0.143015	1e-06	0.133299	4e-06	3	20
Alveolates-Dinoflagellates_Alveolates-Dinoflagellates	HM749923.1.1468_U	Alveolates-Dinoflagellates	Dinophyceae	Eukaryota; Alveolata; Dinophyta; Dinophyceae; Dinophyceae_X; Dinophyceae_XX; Dinophyceae_XXX; Dinophyceae_XXX_sp.;	EU087269.1.895_U	Alveolates-Dinoflagellates	Pfiesteriaceae	Eukaryota; Alveolata; Dinophyta; Dinophyceae; Dinophyceae_X; Pfiesteriaceae; Pfiesteriaceae_X; Pfiesteriaceae_X_sp.;	0.614955	0.614955	0.614955	3	3	17	0	0.027	0.711291	0.000639	0.711291	0.000639	0	0.694164	0.000976	0.694164	0.000976	0	0.118689	0.005966	1e-06	0.007543	1e-06	3	22
Alveolates-Dinoflagellates_Alveolates-Ciliates	HM749923.1.1468_U	Alveolates-Dinoflagellates	Dinophyceae	Eukaryota; Alveolata; Dinophyta; Dinophyceae; Dinophyceae_X; Dinophyceae_XX; Dinophyceae_XXX; Dinophyceae_XXX_sp.;	GU819492.1.1175_U	Alveolates-Ciliates	Spirotrichea	Eukaryota; Alveolata; Ciliophora; Spirotrichea; Strombidiida; Strombidiidae_J; Strombidiidae_J_X; Strombidiidae_J_X_sp.;	-0.671342	-0.671342	-0.671342	1	1	19	0	0.009	-0.709585	0.000667	-0.709585	0.000667	0	-0.738367	0.000306	-0.738367	0.000306	0	0.063892	0.006162	1e-06	0.003482	0	3	25
Alveolates-Dinoflagellates_Alveolates-Syndiniales	HM749923.1.1468_U	Alveolates-Dinoflagellates	Dinophyceae	Eukaryota; Alveolata; Dinophyta; Dinophyceae; Dinophyceae_X; Dinophyceae_XX; Dinophyceae_XXX; Dinophyceae_XXX_sp.;	FJ431723.1.830_U	Alveolates-Syndiniales	Dino-Group-III	Eukaryota; Alveolata; Dinophyta; Syndiniales; Dino-Group-III; Dino-Group-III_X; Dino-Group-III_XX; Dino-Group-III_XX_sp.;	0.617718	0.617718	0.617718	2	2	17	0	0.024	0.71387	0.000598	0.71387	0.000598	0	0.617208	0.004873	0.617208	0.004873	0	0.111069	0.00568	1e-06	0.022267	2e-06	3	27
Alveolates-Dinoflagellates_Alveolates-Dinoflagellates	HM749923.1.1468_U	Alveolates-Dinoflagellates	Dinophyceae	Eukaryota; Alveolata; Dinophyta; Dinophyceae; Dinophyceae_X; Dinophyceae_XX; Dinophyceae_XXX; Dinophyceae_XXX_sp.;	GU825315.1.1202_U	Alveolates-Dinoflagellates	Dinophyceae	Eukaryota; Alveolata; Dinophyta; Dinophyceae; Dinophyceae_X; Dinophyceae_XX; Dinophyceae_XXX; Dinophyceae_XXX_sp.;	0.705408	0.705408	0.705408	3	3	16	0	0.001	0.790567	5.6e-05	0.790567	5.6e-05	0	0.732778	0.000359	0.732778	0.000359	0	0.017494	0.00116	0	0.003847	0	3	32
Alveolates-Dinoflagellates_Stramenopiles-MAST	HM749923.1.1468_U	Alveolates-Dinoflagellates	Dinophyceae	Eukaryota; Alveolata; Dinophyta; Dinophyceae; Dinophyceae_X; Dinophyceae_XX; Dinophyceae_XXX; Dinophyceae_XXX_sp.;	JQ782004.1.1784_U	Stramenopiles-MAST	MAST-1	Eukaryota; Stramenopiles; Stramenopiles_X; MAST; MAST-1; MAST-1C; MAST-1C_X; MAST-1C_X_sp.;	0.738005	0.738005	0.738005	1	1	19	0	0	0.843168	6e-06	0.843168	6e-06	0	0.766798	0.000128	0.766798	0.000128	0	0	0.000254	0	0.001984	0	3	37
Alveolates-Dinoflagellates_Stramenopiles-MAST	HM749923.1.1468_U	Alveolates-Dinoflagellates	Dinophyceae	Eukaryota; Alveolata; Dinophyta; Dinophyceae; Dinophyceae_X; Dinophyceae_XX; Dinophyceae_XXX; Dinophyceae_XXX_sp.;	KF129967.1.1739_U	Stramenopiles-MAST	MAST-9	Eukaryota; Stramenopiles; Stramenopiles_X; MAST; MAST-9; MAST-9A; MAST-9A_X; MAST-9A_X_sp.;	-0.71411	-0.71411	-0.71411	1	1	19	0	0.001	-0.779499	8.3e-05	-0.779499	8.3e-05	0	-0.797191	4.4e-05	-0.797191	4.4e-05	0	0.017494	0.00152	0	0.001001	0	3	38
Alveolates-Dinoflagellates_Alveolates-Dinoflagellates	HM749923.1.1468_U	Alveolates-Dinoflagellates	Dinophyceae	Eukaryota; Alveolata; Dinophyta; Dinophyceae; Dinophyceae_X; Dinophyceae_XX; Dinophyceae_XXX; Dinophyceae_XXX_sp.;	KF129831.1.1758_U	Alveolates-Dinoflagellates	Dinophyceae	Eukaryota; Alveolata; Dinophyta; Dinophyceae; Dinophyceae_X; Dinophyceae_XX; Dinophyceae_XXX; Dinophyceae_XXX_sp.;	0.634499	0.634499	0.634499	3	3	16	0	0.02	0.572314	0.010447	0.572314	0.010447	0	0.600661	0.006537	0.600661	0.006537	0	0.100183	0.038286	3e-06	0.027478	2e-06	3	40
Alveolates-Dinoflagellates_Alveolates-Dinoflagellates	HM749923.1.1468_U	Alveolates-Dinoflagellates	Dinophyceae	Eukaryota; Alveolata; Dinophyta; Dinophyceae; Dinophyceae_X; Dinophyceae_XX; Dinophyceae_XXX; Dinophyceae_XXX_sp.;	HQ896315.1.1736_U	Alveolates-Dinoflagellates	Cochlodinium	Eukaryota; Alveolata; Dinophyta; Dinophyceae; Dinophyceae_X; Dinophyceae_XX; Cochlodinium; Cochlodinium_fulvescens;	0.694576	0.694576	0.694576	1	1	19	0	0.006	0.670603	0.001676	0.670603	0.001676	0	0.681599	0.00131	0.681599	0.00131	0	0.050667	0.011539	1e-06	0.009223	1e-06	3	42
Alveolates-Dinoflagellates_Alveolates-Ciliates	HM749923.1.1468_U	Alveolates-Dinoflagellates	Dinophyceae	Eukaryota; Alveolata; Dinophyta; Dinophyceae; Dinophyceae_X; Dinophyceae_XX; Dinophyceae_XXX; Dinophyceae_XXX_sp.;	KJ762830.1.1769_U	Alveolates-Ciliates	Spirotrichea	Eukaryota; Alveolata; Ciliophora; Spirotrichea; Strombidiida; Tontoniidae_A; Tontoniidae_A_X; Tontoniidae_A_X_sp.;	0.650427	0.650427	0.650427	1	1	18	0	0.007	0.575532	0.009926	0.575532	0.009926	0	0.60318	0.006258	0.60318	0.006258	0	0.055193	0.03718	3e-06	0.026642	2e-06	3	46
Alveolates-Dinoflagellates_Alveolates-Ciliates	HM749923.1.1468_U	Alveolates-Dinoflagellates	Dinophyceae	Eukaryota; Alveolata; Dinophyta; Dinophyceae; Dinophyceae_X; Dinophyceae_XX; Dinophyceae_XXX; Dinophyceae_XXX_sp.;	KF130183.1.1714_U	Alveolates-Ciliates	Colpodea	Eukaryota; Alveolata; Ciliophora; Colpodea; Colpodea-1; Colpodea-1_X; Colpodea-1_XX; Colpodea-1_XX_sp.;	-0.666473	-0.666473	-0.666473	6	1	14	5	0.013	0.110491	0.652489	-0.916071	4e-06	5	0.142669	0.560125	-0.908494	7e-06	5	0.078309	0.473871	0	0.475079	0	3	48
Alveolates-Dinoflagellates_Stramenopiles-Pelagophytes	HM749923.1.1468_U	Alveolates-Dinoflagellates	Dinophyceae	Eukaryota; Alveolata; Dinophyta; Dinophyceae; Dinophyceae_X; Dinophyceae_XX; Dinophyceae_XXX; Dinophyceae_XXX_sp.;	GU196150.1.1374_U	Stramenopiles-Pelagophytes	Pelagomonadaceae_clade_A	Eukaryota; Stramenopiles; Ochrophyta; Pelagophyceae; Pelagomonadales; Pelagomonadaceae; Pelagomonadaceae_clade_A; Pelagomonadaceae_clade_A_sp.;	0.791143	0.791143	0.791143	1	1	19	0	0	0.865387	2e-06	0.865387	2e-06	0	0.838965	7e-06	0.838965	7e-06	0	0	0.000118	0	0.000318	0	3	52
Alveolates-Dinoflagellates_Alveolates-Ciliates	HM749923.1.1468_U	Alveolates-Dinoflagellates	Dinophyceae	Eukaryota; Alveolata; Dinophyta; Dinophyceae; Dinophyceae_X; Dinophyceae_XX; Dinophyceae_XXX; Dinophyceae_XXX_sp.;	GU819408.1.1363_U	Alveolates-Ciliates	Colpodea	Eukaryota; Alveolata; Ciliophora; Colpodea; Colpodea-1; Colpodea-1_X; Colpodea-1_XX; Colpodea-1_XX_sp.;	0.655414	0.655414	0.655414	3	1	17	2	0.016	0.335812	0.15984	0.625569	0.007235	2	0.410706	0.080686	0.703431	0.001629	2	0.088365	0.216314	2e-06	0.150297	1e-06	3	58
Alveolates-Dinoflagellates_Stramenopiles-Other	HM749923.1.1468_U	Alveolates-Dinoflagellates	Dinophyceae	Eukaryota; Alveolata; Dinophyta; Dinophyceae; Dinophyceae_X; Dinophyceae_XX; Dinophyceae_XXX; Dinophyceae_XXX_sp.;	EU499990.1.824_U	Stramenopiles-Other	Triparma	Eukaryota; Stramenopiles; Ochrophyta; Bolidophyceae; Parmales; Triparmaceae; Triparma; Triparma_eleuthera;	-0.693441	-0.693441	-0.693441	1	1	19	0	0.004	-0.67834	0.001411	-0.67834	0.001411	0	-0.752745	0.0002	-0.752745	0.0002	0	0.040295	0.010244	1e-06	0.002622	0	3	59
Alveolates-Dinoflagellates_Stramenopiles-Other	HM749923.1.1468_U	Alveolates-Dinoflagellates	Dinophyceae	Eukaryota; Alveolata; Dinophyta; Dinophyceae; Dinophyceae_X; Dinophyceae_XX; Dinophyceae_XXX; Dinophyceae_XXX_sp.;	EF695122.1.814_U	Stramenopiles-Other	MOCH-2	Eukaryota; Stramenopiles; Stramenopiles_X; MOCH; MOCH-2; MOCH-2_X; MOCH-2_XX; MOCH-2_XX_sp.;	-0.773266	-0.773266	-0.773266	1	1	19	0	0	-0.773167	0.000104	-0.773167	0.000104	0	-0.783832	7.2e-05	-0.783832	7.2e-05	0	0	0.001764	0	0.00136	0	3	60
Alveolates-Dinoflagellates_Stramenopiles-MAST	HM749923.1.1468_U	Alveolates-Dinoflagellates	Dinophyceae	Eukaryota; Alveolata; Dinophyta; Dinophyceae; Dinophyceae_X; Dinophyceae_XX; Dinophyceae_XXX; Dinophyceae_XXX_sp.;	AJ402357.1.1758_U	Stramenopiles-MAST	MAST-3	Eukaryota; Stramenopiles; Stramenopiles_X; MAST; MAST-3; MAST-3A; MAST-3A_X; MAST-3A_X_sp.;	-0.61691	-0.61691	-0.61691	1	1	19	0	0.026	-0.641653	0.003063	-0.641653	0.003063	0	-0.673398	0.001575	-0.673398	0.001575	0	0.116273	0.017161	2e-06	0.010399	1e-06	3	63
Alveolates-Dinoflagellates_Alveolates-Dinoflagellates	HM749923.1.1468_U	Alveolates-Dinoflagellates	Dinophyceae	Eukaryota; Alveolata; Dinophyta; Dinophyceae; Dinophyceae_X; Dinophyceae_XX; Dinophyceae_XXX; Dinophyceae_XXX_sp.;	GU825000.1.1197_U	Alveolates-Dinoflagellates	Dinophyceae	Eukaryota; Alveolata; Dinophyta; Dinophyceae; Dinophyceae_X; Dinophyceae_XX; Dinophyceae_XXX; Dinophyceae_XXX_sp.;	-0.6938	-0.6938	-0.6938	1	2	18	-1	0.006	-0.583451	0.008733	-0.708803	0.000991	-1	-0.656428	0.002269	-0.766133	0.000209	-1	0.050667	0.034174	1e-06	0.013465	0	3	64
Alveolates-Dinoflagellates_Alveolates-Dinoflagellates	HM749923.1.1468_U	Alveolates-Dinoflagellates	Dinophyceae	Eukaryota; Alveolata; Dinophyta; Dinophyceae; Dinophyceae_X; Dinophyceae_XX; Dinophyceae_XXX; Dinophyceae_XXX_sp.;	HE611580.1.1746_U	Alveolates-Dinoflagellates	Gyrodinium	Eukaryota; Alveolata; Dinophyta; Dinophyceae; Dinophyceae_X; Dinophyceae_XX; Gyrodinium; Gyrodinium_sp.;	0.771506	0.771506	0.771506	1	1	19	0	0	0.841304	6e-06	0.841304	6e-06	0	0.830553	1.1e-05	0.830553	1.1e-05	0	0	0.000269	0	0.000416	0	3	65
Alveolates-Dinoflagellates_Alveolates-Dinoflagellates	HM749923.1.1468_U	Alveolates-Dinoflagellates	Dinophyceae	Eukaryota; Alveolata; Dinophyta; Dinophyceae; Dinophyceae_X; Dinophyceae_XX; Dinophyceae_XXX; Dinophyceae_XXX_sp.;	HM581766.1.1782_U	Alveolates-Dinoflagellates	Prorocentrum	Eukaryota; Alveolata; Dinophyta; Dinophyceae; Dinophyceae_X; Dinophyceae_XX; Prorocentrum; Prorocentrum_sp.;	0.687062	0.687062	0.687062	2	2	18	0	0	0.701347	0.00082	0.701347	0.00082	0	0.75735	0.000173	0.75735	0.000173	0	0	0.006999	1e-06	0.002401	0	3	66
Alveolates-Dinoflagellates_Alveolates-Dinoflagellates	HM749923.1.1468_U	Alveolates-Dinoflagellates	Dinophyceae	Eukaryota; Alveolata; Dinophyta; Dinophyceae; Dinophyceae_X; Dinophyceae_XX; Dinophyceae_XXX; Dinophyceae_XXX_sp.;	EU500118.1.810_U	Alveolates-Dinoflagellates	Gymnodinium	Eukaryota; Alveolata; Dinophyta; Dinophyceae; Dinophyceae_X; Dinophyceae_XX; Gymnodinium; Gymnodinium_sp.;	0.649938	0.649938	0.649938	2	2	18	0	0.014	0.600593	0.006545	0.600593	0.006545	0	0.654083	0.002382	0.654083	0.002382	0	0.081741	0.028068	2e-06	0.013911	1e-06	3	67
Alveolates-Dinoflagellates_Alveolates-Ciliates	HM749923.1.1468_U	Alveolates-Dinoflagellates	Dinophyceae	Eukaryota; Alveolata; Dinophyta; Dinophyceae; Dinophyceae_X; Dinophyceae_XX; Dinophyceae_XXX; Dinophyceae_XXX_sp.;	JX188331.1.1726_U	Alveolates-Ciliates	Oligohymenophorea	Eukaryota; Alveolata; Ciliophora; Oligohymenophorea; Scuticociliatia; Scuticociliatia-1; Scuticociliatia-1_X; Scuticociliatia-1_X_sp.;	-0.684738	-0.684738	-0.684738	2	2	18	0	0.004	-0.755461	0.000184	-0.755461	0.000184	0	-0.701185	0.000823	-0.701185	0.000823	0	0.040295	0.002597	0	0.006785	1e-06	3	69
Alveolates-Dinoflagellates_Alveolates-Dinoflagellates	HM749923.1.1468_U	Alveolates-Dinoflagellates	Dinophyceae	Eukaryota; Alveolata; Dinophyta; Dinophyceae; Dinophyceae_X; Dinophyceae_XX; Dinophyceae_XXX; Dinophyceae_XXX_sp.;	HM561067.1.974_U	Alveolates-Dinoflagellates	Dinophyceae	Eukaryota; Alveolata; Dinophyta; Dinophyceae; Dinophyceae_X; Dinophyceae_XX; Dinophyceae_XXX; Dinophyceae_XXX_sp.;	-0.616958	-0.616958	-0.616958	1	2	18	-1	0.032	-0.594793	0.007228	-0.678918	0.001948	-1	-0.622203	0.004445	-0.71554	0.000842	-1	0.129095	0.030166	1e-06	0.020989	1e-06	3	71
Alveolates-Dinoflagellates_Alveolates-Ciliates	HM749923.1.1468_U	Alveolates-Dinoflagellates	Dinophyceae	Eukaryota; Alveolata; Dinophyta; Dinophyceae; Dinophyceae_X; Dinophyceae_XX; Dinophyceae_XXX; Dinophyceae_XXX_sp.;	AY665059.1.1720_U	Alveolates-Ciliates	Oligohymenophorea	Eukaryota; Alveolata; Ciliophora; Oligohymenophorea; Scuticociliatia; Scuticociliatia-1; Scuticociliatia-1_X; Scuticociliatia-1_X_sp.;	-0.670121	-0.670121	-0.670121	1	1	19	0	0.009	-0.751639	0.000207	-0.751639	0.000207	0	-0.750219	0.000216	-0.750219	0.000216	0	0.063892	0.002811	0	0.002768	0	3	77
Alveolates-Dinoflagellates_Rhizaria-Acantharia	HM749923.1.1468_U	Alveolates-Dinoflagellates	Dinophyceae	Eukaryota; Alveolata; Dinophyta; Dinophyceae; Dinophyceae_X; Dinophyceae_XX; Dinophyceae_XXX; Dinophyceae_XXX_sp.;	HM561210.1.973_U	Rhizaria-Acantharia	Acantharea	Eukaryota; Rhizaria; Radiolaria; Acantharea; Acantharea_X; Acantharea_XX; Acantharea_XXX; Acantharea_XXX_sp.;	-0.725991	-0.725991	-0.725991	1	1	19	0	0.002	-0.821067	1.6e-05	-0.821067	1.6e-05	0	-0.803336	3.4e-05	-0.803336	3.4e-05	0	0.026563	0.000497	0	0.000857	0	3	80
Alveolates-Dinoflagellates_Archaeplastids-Chlorophytes	HM749923.1.1468_U	Alveolates-Dinoflagellates	Dinophyceae	Eukaryota; Alveolata; Dinophyta; Dinophyceae; Dinophyceae_X; Dinophyceae_XX; Dinophyceae_XXX; Dinophyceae_XXX_sp.;	EU143529.1.906_U	Archaeplastids-Chlorophytes	Pyramimonadales	Eukaryota; Archaeplastida; Chlorophyta; Pyramimonadales; Pyramimonadales_X; Pyramimonadales_XX; Pterosperma; Pterosperma_sp.;	0.684702	0.684702	0.684702	1	1	19	0	0.004	0.613701	0.005193	0.613701	0.005193	0	0.756258	0.000179	0.756258	0.000179	0	0.040295	0.024249	2e-06	0.002451	0	3	84
Alveolates-Dinoflagellates_Alveolates-Ciliates	HM749923.1.1468_U	Alveolates-Dinoflagellates	Dinophyceae	Eukaryota; Alveolata; Dinophyta; Dinophyceae; Dinophyceae_X; Dinophyceae_XX; Dinophyceae_XXX; Dinophyceae_XXX_sp.;	HQ866199.1.872_U	Alveolates-Ciliates	Spirotrichea	Eukaryota; Alveolata; Ciliophora; Spirotrichea; Strombidiida_F; Strombidiida_F_X; Strombidiida_F_XX; Strombidiida_F_XX_sp.;	0.627988	0.627988	0.627988	3	3	16	0	0.032	0.675803	0.001493	0.675803	0.001493	0	0.497805	0.03009	0.497805	0.03009	0	0.129095	0.010662	1e-06	0.078648	5e-06	3	88
Alveolates-Dinoflagellates_Haptophytes	HM749923.1.1468_U	Alveolates-Dinoflagellates	Dinophyceae	Eukaryota; Alveolata; Dinophyta; Dinophyceae; Dinophyceae_X; Dinophyceae_XX; Dinophyceae_XXX; Dinophyceae_XXX_sp.;	JX680347	Haptophytes	Haptophyta_Clade_HAP3	Eukaryota; Hacrobia; Haptophyta; Haptophyta_Clade_HAP3; Haptophyta_Clade_HAP3_X; Haptophyta_Clade_HAP3_XX; Haptophyta_Clade_HAP3_XXX; Haptophyta_Clade_HAP3_XXX_sp.;	0.649442	0.649442	0.649442	2	2	18	0	0.017	0.603307	0.006244	0.603307	0.006244	0	0.647343	0.002733	0.647343	0.002733	0	0.091523	0.027242	2e-06	0.015196	1e-06	3	94
Alveolates-Dinoflagellates_Alveolates-Dinoflagellates	HM749923.1.1468_U	Alveolates-Dinoflagellates	Dinophyceae	Eukaryota; Alveolata; Dinophyta; Dinophyceae; Dinophyceae_X; Dinophyceae_XX; Dinophyceae_XXX; Dinophyceae_XXX_sp.;	EU793087.1.924_U	Alveolates-Dinoflagellates	Dinophyceae	Eukaryota; Alveolata; Dinophyta; Dinophyceae; Dinophyceae_X; Dinophyceae_XX; Dinophyceae_XXX; Dinophyceae_XXX_sp.;	0.722537	0.722537	0.722537	1	1	19	0	0	0.83014	1.1e-05	0.83014	1.1e-05	0	0.794208	4.9e-05	0.794208	4.9e-05	0	0	0.00038	0	0.001052	0	3	97
Alveolates-Dinoflagellates_Alveolates-Dinoflagellates	HM749923.1.1468_U	Alveolates-Dinoflagellates	Dinophyceae	Eukaryota; Alveolata; Dinophyta; Dinophyceae; Dinophyceae_X; Dinophyceae_XX; Dinophyceae_XXX; Dinophyceae_XXX_sp.;	FJ402953.1.1215_U	Alveolates-Dinoflagellates	Neoceratium	Eukaryota; Alveolata; Dinophyta; Dinophyceae; Dinophyceae_X; Dinophyceae_XX; Neoceratium; Neoceratium_petersii;	0.697105	0.697105	0.697105	2	1	17	1	0.006	0.252381	0.29722	0.624309	0.005616	1	0.308165	0.199289	0.627775	0.005281	1	0.050667	0.311662	2e-06	0.264589	2e-06	3	98
Alveolates-Dinoflagellates_Alveolates-Syndiniales	HM749923.1.1468_U	Alveolates-Dinoflagellates	Dinophyceae	Eukaryota; Alveolata; Dinophyta; Dinophyceae; Dinophyceae_X; Dinophyceae_XX; Dinophyceae_XXX; Dinophyceae_XXX_sp.;	EF172977.1.1676_U	Alveolates-Syndiniales	Dino-Group-II	Eukaryota; Alveolata; Dinophyta; Syndiniales; Dino-Group-II; Dino-Group-II-Clade-7; Dino-Group-II-Clade-7_X; Dino-Group-II-Clade-7_X_sp.;	-0.65954	-0.65954	-0.65954	1	2	15	-1	0.012	-0.405139	0.085295	-0.728348	0.000609	-1	-0.39921	0.090414	-0.742119	0.000421	-1	0.074959	0.147119	1e-06	0.161486	1e-06	3	100
Alveolates-Dinoflagellates_Alveolates-Ciliates	HM749923.1.1468_U	Alveolates-Dinoflagellates	Dinophyceae	Eukaryota; Alveolata; Dinophyta; Dinophyceae; Dinophyceae_X; Dinophyceae_XX; Dinophyceae_XXX; Dinophyceae_XXX_sp.;	HQ867071.1.870_U	Alveolates-Ciliates	Spirotrichea	Eukaryota; Alveolata; Ciliophora; Spirotrichea; Strombidiida_G; Strombidiida_G_X; Strombidiida_G_XX; Strombidiida_G_XX_sp.;	0.628991	0.628991	0.628991	1	1	19	0	0.027	0.731519	0.000372	0.731519	0.000372	0	0.653205	0.002425	0.653205	0.002425	0	0.118689	0.004243	0	0.014074	1e-06	3	106
Alveolates-Dinoflagellates_Alveolates-Syndiniales	HM749923.1.1468_U	Alveolates-Dinoflagellates	Dinophyceae	Eukaryota; Alveolata; Dinophyta; Dinophyceae; Dinophyceae_X; Dinophyceae_XX; Dinophyceae_XXX; Dinophyceae_XXX_sp.;	EU793278.1.1575_U	Alveolates-Syndiniales	Dino-Group-II	Eukaryota; Alveolata; Dinophyta; Syndiniales; Dino-Group-II; Dino-Group-II-Clade-6; Dino-Group-II-Clade-6_X; Dino-Group-II-Clade-6_X_sp.;	-0.608796	-0.608796	-0.608796	1	1	19	0	0.037	-0.64156	0.003068	-0.64156	0.003068	0	-0.618567	0.004754	-0.618567	0.004754	0	0.139515	0.017185	2e-06	0.021849	2e-06	3	109
Alveolates-Dinoflagellates_Stramenopiles-MAST	HM749923.1.1468_U	Alveolates-Dinoflagellates	Dinophyceae	Eukaryota; Alveolata; Dinophyta; Dinophyceae; Dinophyceae_X; Dinophyceae_XX; Dinophyceae_XXX; Dinophyceae_XXX_sp.;	EU499985.1.853_U	Stramenopiles-MAST	MAST-7	Eukaryota; Stramenopiles; Stramenopiles_X; MAST; MAST-7; MAST-7B; MAST-7B_X; MAST-7B_X_sp.;	0.637399	0.637399	0.637399	2	2	18	0	0.014	0.634843	0.003499	0.634843	0.003499	0	0.674857	0.001525	0.674857	0.001525	0	0.081741	0.01866	2e-06	0.010187	1e-06	3	110
Alveolates-Dinoflagellates_Alveolates-Dinoflagellates	HM749923.1.1468_U	Alveolates-Dinoflagellates	Dinophyceae	Eukaryota; Alveolata; Dinophyta; Dinophyceae; Dinophyceae_X; Dinophyceae_XX; Dinophyceae_XXX; Dinophyceae_XXX_sp.;	AY664921.1.1754_U	Alveolates-Dinoflagellates	Prorocentrum	Eukaryota; Alveolata; Dinophyta; Dinophyceae; Dinophyceae_X; Dinophyceae_XX; Prorocentrum; Prorocentrum_sp.;	0.752273	0.752273	0.752273	2	2	18	0	0	0.705332	0.000743	0.705332	0.000743	0	0.792801	5.2e-05	0.792801	5.2e-05	0	0	0.006634	1e-06	0.001086	0	3	111
Alveolates-Dinoflagellates_Alveolates-Ciliates	HM749923.1.1468_U	Alveolates-Dinoflagellates	Dinophyceae	Eukaryota; Alveolata; Dinophyta; Dinophyceae; Dinophyceae_X; Dinophyceae_XX; Dinophyceae_XXX; Dinophyceae_XXX_sp.;	DQ120009.1.1729_U	Alveolates-Ciliates	Litostomatea	Eukaryota; Alveolata; Ciliophora; Litostomatea; Cyclotrichia; Cyclotrichia_X; Cyclotrichia_XX; Cyclotrichia_XX_sp.;	-0.735546	-0.735546	-0.735546	1	1	19	0	0	-0.800059	3.9e-05	-0.800059	3.9e-05	0	-0.790698	5.6e-05	-0.790698	5.6e-05	0	0	0.000916	0	0.001146	0	3	113
Alveolates-Dinoflagellates_Alveolates-Dinoflagellates	HM749923.1.1468_U	Alveolates-Dinoflagellates	Dinophyceae	Eukaryota; Alveolata; Dinophyta; Dinophyceae; Dinophyceae_X; Dinophyceae_XX; Dinophyceae_XXX; Dinophyceae_XXX_sp.;	KJ759269.1.1802_U	Alveolates-Dinoflagellates	Dinophyceae	Eukaryota; Alveolata; Dinophyta; Dinophyceae; Dinophyceae_X; Dinophyceae_XX; Dinophyceae_XXX; Dinophyceae_XXX_sp.;	0.612811	0.612811	0.612811	3	3	17	0	0.03	0.45539	0.05008	0.626833	0.021863	-6	0.548968	0.014924	0.588721	0.034277	-6	0.125466	0.106072	4e-06	0.049141	5e-06	3	116
Alveolates-Dinoflagellates_Alveolates-Dinoflagellates	HM749923.1.1468_U	Alveolates-Dinoflagellates	Dinophyceae	Eukaryota; Alveolata; Dinophyta; Dinophyceae; Dinophyceae_X; Dinophyceae_XX; Dinophyceae_XXX; Dinophyceae_XXX_sp.;	FN690221.1.1692_U	Alveolates-Dinoflagellates	Dinophyceae	Eukaryota; Alveolata; Dinophyta; Dinophyceae; Dinophyceae_X; Dinophyceae_XX; Dinophyceae_XXX; Dinophyceae_XXX_sp.;	0.721317	0.721317	0.721317	1	1	19	0	0.004	0.615409	0.005035	0.739003	0.000459	1	0.773146	0.000104	0.773146	0.000104	0	0.040295	0.023781	1e-06	0.001727	0	3	118
Alveolates-Dinoflagellates_Stramenopiles-MAST	HM749923.1.1468_U	Alveolates-Dinoflagellates	Dinophyceae	Eukaryota; Alveolata; Dinophyta; Dinophyceae; Dinophyceae_X; Dinophyceae_XX; Dinophyceae_XXX; Dinophyceae_XXX_sp.;	KC582992.1.1792_U	Stramenopiles-MAST	MAST-3	Eukaryota; Stramenopiles; Stramenopiles_X; MAST; MAST-3; MAST-3L; MAST-3L_X; MAST-3L_X_sp.;	-0.687425	-0.687425	-0.687425	1	1	19	0	0.005	-0.722642	0.000474	-0.722642	0.000474	0	-0.695347	0.000949	-0.695347	0.000949	0	0.0456	0.004927	1e-06	0.007425	1e-06	3	119
Alveolates-Dinoflagellates_Stramenopiles-Other	HM749923.1.1468_U	Alveolates-Dinoflagellates	Dinophyceae	Eukaryota; Alveolata; Dinophyta; Dinophyceae; Dinophyceae_X; Dinophyceae_XX; Dinophyceae_XXX; Dinophyceae_XXX_sp.;	EF695169.1.817_U	Stramenopiles-Other	Florenciellales	Eukaryota; Stramenopiles; Ochrophyta; Dictyochophyceae; Dictyochophyceae_X; Florenciellales; Florenciellales_X; Florenciellales_X_sp.;	0.788219	0.788219	0.788219	1	1	19	0	0.001	0.890773	0	0.890773	0	0	0.841089	6e-06	0.841089	6e-06	0	0.017494	4.5e-05	0	0.000292	0	3	121
Alveolates-Dinoflagellates_Alveolates-Ciliates	HM749923.1.1468_U	Alveolates-Dinoflagellates	Dinophyceae	Eukaryota; Alveolata; Dinophyta; Dinophyceae; Dinophyceae_X; Dinophyceae_XX; Dinophyceae_XXX; Dinophyceae_XXX_sp.;	KJ759417.1.1743_U	Alveolates-Ciliates	Spirotrichea	Eukaryota; Alveolata; Ciliophora; Spirotrichea; Choreotrichida; Leegaardiellidae_B; Leegaardiella; Leegaardiella_sp.;	0.633395	0.633395	0.633395	3	1	16	2	0.018	-0.107554	0.661194	0.657347	0.004137	2	-0.069481	0.777451	0.613497	0.008813	2	0.094526	0.476721	2e-06	0.557163	3e-06	3	124
Alveolates-Dinoflagellates_Alveolates-Ciliates	HM749923.1.1468_U	Alveolates-Dinoflagellates	Dinophyceae	Eukaryota; Alveolata; Dinophyta; Dinophyceae; Dinophyceae_X; Dinophyceae_XX; Dinophyceae_XXX; Dinophyceae_XXX_sp.;	KC582955.1.1774_U	Alveolates-Ciliates	Spirotrichea	Eukaryota; Alveolata; Ciliophora; Spirotrichea; Strombidiida; Strombidiida_X; Strombidiida_XX; Strombidiida_XX_sp.;	-0.698783	-0.698783	-0.698783	1	1	19	0	0	-0.644098	0.002917	-0.680445	0.001885	-1	-0.726635	0.000426	-0.743418	0.000406	-1	0	0.016662	1e-06	0.004292	0	3	125
Alveolates-Dinoflagellates_Haptophytes	HM749923.1.1468_U	Alveolates-Dinoflagellates	Dinophyceae	Eukaryota; Alveolata; Dinophyta; Dinophyceae; Dinophyceae_X; Dinophyceae_XX; Dinophyceae_XXX; Dinophyceae_XXX_sp.;	HG970975	Haptophytes	Haptophyta	Eukaryota; Hacrobia; Haptophyta; Haptophyta_X; Haptophyta_XX; Haptophyta_XXX; Haptophyta_XXXX; Haptophyta_XXXX_sp.;	0.695747	0.695747	0.695747	1	1	19	0	0.004	0.847338	5e-06	0.847338	5e-06	0	0.757682	0.000172	0.758264	0.000266	-1	0.040295	0.000221	0	0.002391	0	3	126
Alveolates-Dinoflagellates_Alveolates-Syndiniales	HM749923.1.1468_U	Alveolates-Dinoflagellates	Dinophyceae	Eukaryota; Alveolata; Dinophyta; Dinophyceae; Dinophyceae_X; Dinophyceae_XX; Dinophyceae_XXX; Dinophyceae_XXX_sp.;	HQ870498.1.849_U	Alveolates-Syndiniales	Dino-Group-III	Eukaryota; Alveolata; Dinophyta; Syndiniales; Dino-Group-III; Dino-Group-III_X; Dino-Group-III_XX; Dino-Group-III_XX_sp.;	0.696523	0.696523	0.696523	1	1	18	0	0.003	0.879528	1e-06	0.879528	1e-06	0	0.733187	0.000355	0.733187	0.000355	0	0.033974	7.1e-05	0	0.003818	0	3	132
Alveolates-Dinoflagellates_Alveolates-Syndiniales	HM749923.1.1468_U	Alveolates-Dinoflagellates	Dinophyceae	Eukaryota; Alveolata; Dinophyta; Dinophyceae; Dinophyceae_X; Dinophyceae_XX; Dinophyceae_XXX; Dinophyceae_XXX_sp.;	GU824677.1.1204_U	Alveolates-Syndiniales	Dino-Group-II	Eukaryota; Alveolata; Dinophyta; Syndiniales; Dino-Group-II; Dino-Group-II-Clade-10-and-11; Dino-Group-II-Clade-10-and-11_X; Dino-Group-II-Clade-10-and-11_X_sp.;	-0.598751	-0.598751	-0.598751	2	1	18	1	0.047	-0.531323	0.019232	-0.648059	0.003632	1	-0.656127	0.002283	-0.656127	0.002283	0	0.156743	0.056578	2e-06	0.013509	1e-06	3	135
Alveolates-Dinoflagellates_Stramenopiles-Diatoms	HM749923.1.1468_U	Alveolates-Dinoflagellates	Dinophyceae	Eukaryota; Alveolata; Dinophyta; Dinophyceae; Dinophyceae_X; Dinophyceae_XX; Dinophyceae_XXX; Dinophyceae_XXX_sp.;	GU822947.1.1074_U	Stramenopiles-Diatoms	Haslea	Eukaryota; Stramenopiles; Ochrophyta; Bacillariophyta; Bacillariophyta_X; Raphid-pennate; Haslea; Haslea_sp.;	-0.681567	-0.681567	-0.681567	1	2	18	-1	0.008	-0.50189	0.028557	-0.658507	0.002963	-1	-0.593325	0.00741	-0.711777	0.000923	-1	0.059414	0.074029	2e-06	0.030053	1e-06	3	139
Alveolates-Dinoflagellates_Stramenopiles-Chrysophytes	HM749923.1.1468_U	Alveolates-Dinoflagellates	Dinophyceae	Eukaryota; Alveolata; Dinophyta; Dinophyceae; Dinophyceae_X; Dinophyceae_XX; Dinophyceae_XXX; Dinophyceae_XXX_sp.;	KC582997.1.1775_U	Stramenopiles-Chrysophytes	Chrysophyceae_Clade-I	Eukaryota; Stramenopiles; Ochrophyta; Chrysophyceae; Chrysophyceae_X; Chrysophyceae_Clade-I; Chrysophyceae_Clade-I_X; Chrysophyceae_Clade-I_X_sp.;	-0.88588	-0.88588	-0.88588	1	1	19	0	0	-0.888217	0	-0.888217	0	0	-0.914763	0	-0.914763	0	0	0	5.2e-05	0	1.6e-05	0	3	142
Alveolates-Dinoflagellates_Stramenopiles-Diatoms	HM749923.1.1468_U	Alveolates-Dinoflagellates	Dinophyceae	Eukaryota; Alveolata; Dinophyta; Dinophyceae; Dinophyceae_X; Dinophyceae_XX; Dinophyceae_XXX; Dinophyceae_XXX_sp.;	EU499988.1.803_U	Stramenopiles-Diatoms	Raphid-pennate	Eukaryota; Stramenopiles; Ochrophyta; Bacillariophyta; Bacillariophyta_X; Raphid-pennate; Raphid-pennate_X; Raphid-pennate_X_sp.;	-0.835455	-0.835455	-0.835455	1	1	19	0	0	-0.874966	1e-06	-0.874966	1e-06	0	-0.867925	1e-06	-0.867925	1e-06	0	0	8.4e-05	0	0.000127	0	3	145
Alveolates-Dinoflagellates_Cryptophytes	HM749923.1.1468_U	Alveolates-Dinoflagellates	Dinophyceae	Eukaryota; Alveolata; Dinophyta; Dinophyceae; Dinophyceae_X; Dinophyceae_XX; Dinophyceae_XXX; Dinophyceae_XXX_sp.;	GQ863814.1.1651_U	Cryptophytes	Other-unclassified	Eukaryota; Hacrobia; Cryptophyta; Cryptophyceae; Cryptophyceae_X; Goniomonadales; Goniomonas; Goniomonas_sp.;	0.648154	0.648154	0.648154	3	3	17	0	0.019	0.594122	0.007311	0.655267	0.003159	-1	0.611062	0.005445	0.620868	0.005965	-1	0.097312	0.030453	2e-06	0.024257	2e-06	3	146
Alveolates-Dinoflagellates_Stramenopiles-MAST	HM749923.1.1468_U	Alveolates-Dinoflagellates	Dinophyceae	Eukaryota; Alveolata; Dinophyta; Dinophyceae; Dinophyceae_X; Dinophyceae_XX; Dinophyceae_XXX; Dinophyceae_XXX_sp.;	AJ402350.1.1758_U	Stramenopiles-MAST	MAST-1	Eukaryota; Stramenopiles; Stramenopiles_X; MAST; MAST-1; MAST-1D; MAST-1D_X; MAST-1D_X_sp.;	0.701864	0.701864	0.701864	1	1	19	0	0.001	0.795425	4.7e-05	0.795425	4.7e-05	0	0.778314	8.7e-05	0.778314	8.7e-05	0	0.017494	0.001049	0	0.001539	0	3	150
Alveolates-Dinoflagellates_Temp	HM749923.1.1468_U	Alveolates-Dinoflagellates	Dinophyceae	Eukaryota; Alveolata; Dinophyta; Dinophyceae; Dinophyceae_X; Dinophyceae_XX; Dinophyceae_XXX; Dinophyceae_XXX_sp.;	Temp	Temp	NA	NA	-0.661304	-0.661304	-0.661304	3	1	17	2	0.01	-0.323803	0.176254	-0.808247	8.6e-05	2	-0.413082	0.078777	-0.798283	0.000122	2	0.067958	0.229347	0	0.147953	0	3	202
Alveolates-Ciliates_Stramenopiles-MAST	KF130495.1.1710_U	Alveolates-Ciliates	Colpodea	Eukaryota; Alveolata; Ciliophora; Colpodea; Colpodea-1; Colpodea-1_X; Colpodea-1_XX; Colpodea-1_XX_sp.;	JQ782080.1.1737_U	Stramenopiles-MAST	MAST-3	Eukaryota; Stramenopiles; Stramenopiles_X; MAST; MAST-3; MAST-3I; MAST-3I_X; MAST-3I_X_sp.;	0.643357	0.643357	0.643357	2	2	18	0	0.023	0.445112	0.056172	0.503976	0.039138	-2	0.68401	0.001239	0.68401	0.001239	0	0.108834	0.113687	5e-06	0.008896	1e-06	4	13
Alveolates-Ciliates_Stramenopiles-Chrysophytes	KF130495.1.1710_U	Alveolates-Ciliates	Colpodea	Eukaryota; Alveolata; Ciliophora; Colpodea; Colpodea-1; Colpodea-1_X; Colpodea-1_XX; Colpodea-1_XX_sp.;	KC583138.1.1098_U	Stramenopiles-Chrysophytes	Chrysophyceae_Clade-H	Eukaryota; Stramenopiles; Ochrophyta; Chrysophyceae; Chrysophyceae_X; Chrysophyceae_Clade-H; Chrysophyceae_Clade-H_X; Chrysophyceae_Clade-H_X_sp.;	-0.623156	-0.623156	-0.623156	7	2	13	5	0.037	-0.102701	0.675668	0.645962	0.012573	-5	-0.197542	0.417571	-0.661305	0.00726	4	0.139515	0.481934	3e-06	0.405115	2e-06	4	20
Alveolates-Ciliates_Alveolates-Ciliates	KF130495.1.1710_U	Alveolates-Ciliates	Colpodea	Eukaryota; Alveolata; Ciliophora; Colpodea; Colpodea-1; Colpodea-1_X; Colpodea-1_XX; Colpodea-1_XX_sp.;	KJ759341.1.1721_U	Alveolates-Ciliates	Phyllopharyngea	Eukaryota; Alveolata; Ciliophora; Phyllopharyngea; Cyrtophoria; Chlamydodontidae; Chlamydodon; Chlamydodon_sp.;	-0.829402	-0.829402	-0.829402	2	2	18	0	0	-0.732953	0.000357	-0.732953	0.000357	0	-0.817025	2e-05	-0.817025	2e-05	0	0	0.004135	0	0.00059	0	4	24
Alveolates-Ciliates_Alveolates-Ciliates	KF130495.1.1710_U	Alveolates-Ciliates	Colpodea	Eukaryota; Alveolata; Ciliophora; Colpodea; Colpodea-1; Colpodea-1_X; Colpodea-1_XX; Colpodea-1_XX_sp.;	KJ762830.1.1769_U	Alveolates-Ciliates	Spirotrichea	Eukaryota; Alveolata; Ciliophora; Spirotrichea; Strombidiida; Tontoniidae_A; Tontoniidae_A_X; Tontoniidae_A_X_sp.;	0.644269	0.644269	0.644269	2	1	18	1	0.019	0.117994	0.630451	0.569386	0.013646	1	0.309391	0.197414	0.634157	0.004707	1	0.097312	0.465823	3e-06	0.263097	2e-06	4	46
Alveolates-Ciliates_Stramenopiles-Other	KF130495.1.1710_U	Alveolates-Ciliates	Colpodea	Eukaryota; Alveolata; Ciliophora; Colpodea; Colpodea-1; Colpodea-1_X; Colpodea-1_XX; Colpodea-1_XX_sp.;	EF695122.1.814_U	Stramenopiles-Other	MOCH-2	Eukaryota; Stramenopiles; Stramenopiles_X; MOCH; MOCH-2; MOCH-2_X; MOCH-2_XX; MOCH-2_XX_sp.;	-0.609258	-0.609258	-0.609258	7	1	13	6	0.046	-0.299969	0.212123	-0.636049	0.019446	6	-0.409311	0.081824	-0.759285	0.002609	6	0.154843	0.256347	4e-06	0.151454	1e-06	4	60
Alveolates-Ciliates_Stramenopiles-MAST	KF130495.1.1710_U	Alveolates-Ciliates	Colpodea	Eukaryota; Alveolata; Ciliophora; Colpodea; Colpodea-1; Colpodea-1_X; Colpodea-1_XX; Colpodea-1_XX_sp.;	HM135065.1.1732_U	Stramenopiles-MAST	MAST-2	Eukaryota; Stramenopiles; Stramenopiles_X; MAST; MAST-2; MAST-2A; MAST-2A_X; MAST-2A_X_sp.;	0.646954	0.646954	0.646954	1	5	13	-4	0.021	-0.061406	0.8028	-0.661584	0.007227	4	-0.064969	0.791589	0.874778	2e-05	-4	0.10319	0.525661	2e-06	0.561725	0	4	62
Alveolates-Ciliates_Alveolates-Dinoflagellates	KF130495.1.1710_U	Alveolates-Ciliates	Colpodea	Eukaryota; Alveolata; Ciliophora; Colpodea; Colpodea-1; Colpodea-1_X; Colpodea-1_XX; Colpodea-1_XX_sp.;	HM581766.1.1782_U	Alveolates-Dinoflagellates	Prorocentrum	Eukaryota; Alveolata; Dinophyta; Dinophyceae; Dinophyceae_X; Dinophyceae_XX; Prorocentrum; Prorocentrum_sp.;	0.617985	0.617985	0.617985	1	1	19	0	0.043	0.608928	0.005656	0.608928	0.005656	0	0.647368	0.002732	0.647368	0.002732	0	0.150291	0.02554	2e-06	0.015196	1e-06	4	66
Alveolates-Ciliates_Stramenopiles-MAST	KF130495.1.1710_U	Alveolates-Ciliates	Colpodea	Eukaryota; Alveolata; Ciliophora; Colpodea; Colpodea-1; Colpodea-1_X; Colpodea-1_XX; Colpodea-1_XX_sp.;	JQ782035.1.1781_U	Stramenopiles-MAST	MAST-3	Eukaryota; Stramenopiles; Stramenopiles_X; MAST; MAST-3; MAST-3I; MAST-3I_X; MAST-3I_X_sp.;	0.716198	0.716198	0.716198	2	1	18	1	0.005	0.19744	0.417816	0.686788	0.001642	1	0.42738	0.067979	0.779556	0.000137	1	0.0456	0.376892	1e-06	0.135095	0	4	68
Alveolates-Ciliates_Alveolates-Ciliates	KF130495.1.1710_U	Alveolates-Ciliates	Colpodea	Eukaryota; Alveolata; Ciliophora; Colpodea; Colpodea-1; Colpodea-1_X; Colpodea-1_XX; Colpodea-1_XX_sp.;	KF129779.1.1734_U	Alveolates-Ciliates	Spirotrichea	Eukaryota; Alveolata; Ciliophora; Spirotrichea; Strombidiida; Tontoniidae_A; Spirotontonia; Spirotontonia_sp.;	0.630567	0.630567	0.630567	5	2	15	3	0.027	-0.152648	0.532708	0.7595	0.000643	3	-0.2	0.411681	0.638235	0.007801	3	0.118689	0.42973	1e-06	0.402305	2e-06	4	72
Alveolates-Ciliates_Archaeplastids-Chlorophytes	KF130495.1.1710_U	Alveolates-Ciliates	Colpodea	Eukaryota; Alveolata; Ciliophora; Colpodea; Colpodea-1; Colpodea-1_X; Colpodea-1_XX; Colpodea-1_XX_sp.;	EU143529.1.906_U	Archaeplastids-Chlorophytes	Pyramimonadales	Eukaryota; Archaeplastida; Chlorophyta; Pyramimonadales; Pyramimonadales_X; Pyramimonadales_XX; Pterosperma; Pterosperma_sp.;	0.628533	0.628533	0.628533	2	2	18	0	0.027	0.702336	0.0008	0.702336	0.0008	0	0.607551	0.005796	0.646695	0.003727	-1	0.118689	0.006893	1e-06	0.025322	2e-06	4	84
Alveolates-Ciliates_Alveolates-Syndiniales	KF130495.1.1710_U	Alveolates-Ciliates	Colpodea	Eukaryota; Alveolata; Ciliophora; Colpodea; Colpodea-1; Colpodea-1_X; Colpodea-1_XX; Colpodea-1_XX_sp.;	GU820270.1.1197_U	Alveolates-Syndiniales	Dino-Group-I	Eukaryota; Alveolata; Dinophyta; Syndiniales; Dino-Group-I; Dino-Group-I-Clade-6; Dino-Group-I-Clade-6_X; Dino-Group-I-Clade-6_X_sp.;	0.626551	0.626551	0.626551	6	3	14	3	0.025	-0.112929	0.645298	0.583656	0.036247	6	0.066725	0.786079	0.723873	0.003422	5	0.113584	0.470828	5e-06	0.560265	2e-06	4	104
Alveolates-Ciliates_Alveolates-Ciliates	KF130495.1.1710_U	Alveolates-Ciliates	Colpodea	Eukaryota; Alveolata; Ciliophora; Colpodea; Colpodea-1; Colpodea-1_X; Colpodea-1_XX; Colpodea-1_XX_sp.;	HQ867071.1.870_U	Alveolates-Ciliates	Spirotrichea	Eukaryota; Alveolata; Ciliophora; Spirotrichea; Strombidiida_G; Strombidiida_G_X; Strombidiida_G_XX; Strombidiida_G_XX_sp.;	0.68325	0.68325	0.68325	7	1	13	6	0.009	0.317485	0.185332	0.66768	0.012641	6	0.271172	0.261451	0.714286	0.006088	6	0.063892	0.236047	3e-06	0.311755	2e-06	4	106
Alveolates-Ciliates_Stramenopiles-MAST	KF130495.1.1710_U	Alveolates-Ciliates	Colpodea	Eukaryota; Alveolata; Ciliophora; Colpodea; Colpodea-1; Colpodea-1_X; Colpodea-1_XX; Colpodea-1_XX_sp.;	KC582992.1.1792_U	Stramenopiles-MAST	MAST-3	Eukaryota; Stramenopiles; Stramenopiles_X; MAST; MAST-3; MAST-3L; MAST-3L_X; MAST-3L_X_sp.;	-0.634414	-0.634414	-0.634414	6	2	14	4	0.03	-0.316213	0.187198	-0.614453	0.025451	6	-0.428258	0.067355	-0.673816	0.005882	4	0.125466	0.237579	4e-06	0.134423	2e-06	4	119
Alveolates-Ciliates_Stramenopiles-Other	KF130495.1.1710_U	Alveolates-Ciliates	Colpodea	Eukaryota; Alveolata; Ciliophora; Colpodea; Colpodea-1; Colpodea-1_X; Colpodea-1_XX; Colpodea-1_XX_sp.;	EF695169.1.817_U	Stramenopiles-Other	Florenciellales	Eukaryota; Stramenopiles; Ochrophyta; Dictyochophyceae; Dictyochophyceae_X; Florenciellales; Florenciellales_X; Florenciellales_X_sp.;	0.708562	0.708562	0.708562	1	2	18	-1	0.003	0.488966	0.033627	0.595306	0.009148	-1	0.53269	0.018867	0.833247	1.8e-05	-1	0.033974	0.082301	3e-06	0.057592	0	4	121
Alveolates-Ciliates_Alveolates-Ciliates	KF130495.1.1710_U	Alveolates-Ciliates	Colpodea	Eukaryota; Alveolata; Ciliophora; Colpodea; Colpodea-1; Colpodea-1_X; Colpodea-1_XX; Colpodea-1_XX_sp.;	KC582955.1.1774_U	Alveolates-Ciliates	Spirotrichea	Eukaryota; Alveolata; Ciliophora; Spirotrichea; Strombidiida; Strombidiida_X; Strombidiida_XX; Strombidiida_XX_sp.;	-0.656647	-0.656647	-0.656647	7	7	13	0	0.013	-0.518716	0.022873	-0.518716	0.022873	0	-0.654386	0.002367	-0.696594	0.001318	-1	0.078309	0.063741	4e-06	0.013858	1e-06	4	125
Alveolates-Ciliates_Temp	KF130495.1.1710_U	Alveolates-Ciliates	Colpodea	Eukaryota; Alveolata; Ciliophora; Colpodea; Colpodea-1; Colpodea-1_X; Colpodea-1_XX; Colpodea-1_XX_sp.;	Temp	Temp	NA	NA	-0.621302	-0.621302	-0.621302	6	4	14	2	0.044	-0.265158	0.27259	-0.622063	0.007668	2	-0.361562	0.128255	-0.658492	0.00405	2	0.151655	0.296813	2e-06	0.201258	2e-06	4	202
Alveolates-Dinoflagellates_Alveolates-Ciliates	GU825088.1.1075_U	Alveolates-Dinoflagellates	Dinophyceae	Eukaryota; Alveolata; Dinophyta; Dinophyceae; Dinophyceae_X; Dinophyceae_XX; Dinophyceae_XXX; Dinophyceae_XXX_sp.;	KC488375.1.1634_U	Alveolates-Ciliates	Colpodea	Eukaryota; Alveolata; Ciliophora; Colpodea; Colpodea-1; Colpodea-1_X; Colpodea-1_XX; Colpodea-1_XX_sp.;	-0.644718	-0.644718	-0.644718	2	2	17	0	0.021	-0.63385	0.003567	-0.63385	0.003567	0	-0.703509	0.000777	-0.703509	0.000777	0	0.10319	0.018938	2e-06	0.0065	1e-06	6	8
Alveolates-Dinoflagellates_Alveolates-Dinoflagellates	GU825088.1.1075_U	Alveolates-Dinoflagellates	Dinophyceae	Eukaryota; Alveolata; Dinophyta; Dinophyceae; Dinophyceae_X; Dinophyceae_XX; Dinophyceae_XXX; Dinophyceae_XXX_sp.;	EF527080.1.1343_U	Alveolates-Dinoflagellates	Dinophyceae	Eukaryota; Alveolata; Dinophyta; Dinophyceae; Dinophyceae_X; Dinophyceae_XX; Dinophyceae_XXX; Dinophyceae_XXX_sp.;	0.835374	0.835374	0.835374	1	1	19	0	0	0.833127	9e-06	0.833127	9e-06	0	0.829825	1.1e-05	0.829825	1.1e-05	0	0	0.000353	0	0.000421	0	6	9
Alveolates-Dinoflagellates_Alveolates-Ciliates	GU825088.1.1075_U	Alveolates-Dinoflagellates	Dinophyceae	Eukaryota; Alveolata; Dinophyta; Dinophyceae; Dinophyceae_X; Dinophyceae_XX; Dinophyceae_XXX; Dinophyceae_XXX_sp.;	KJ763611.1.1765_U	Alveolates-Ciliates	Oligohymenophorea	Eukaryota; Alveolata; Ciliophora; Oligohymenophorea; Scuticociliatia; Scuticociliatia-1; Scuticociliatia-1_X; Scuticociliatia-1_X_sp.;	-0.677761	-0.677761	-0.677761	3	3	17	0	0.013	-0.729523	0.000393	-0.729523	0.000393	0	-0.723124	0.000468	-0.723124	0.000468	0	0.078309	0.004373	1e-06	0.00457	1e-06	6	10
Alveolates-Dinoflagellates_Stramenopiles-Other	GU825088.1.1075_U	Alveolates-Dinoflagellates	Dinophyceae	Eukaryota; Alveolata; Dinophyta; Dinophyceae; Dinophyceae_X; Dinophyceae_XX; Dinophyceae_XXX; Dinophyceae_XXX_sp.;	EU500162.1.816_U	Stramenopiles-Other	Florenciellales	Eukaryota; Stramenopiles; Ochrophyta; Dictyochophyceae; Dictyochophyceae_X; Florenciellales; Florenciellales_X; Florenciellales_X_sp.;	0.741201	0.741201	0.741201	3	3	17	0	0.003	0.753375	0.000196	0.753375	0.000196	0	0.759661	0.000161	0.759661	0.000161	0	0.033974	0.002713	0	0.002313	0	6	15
Alveolates-Dinoflagellates_Stramenopiles-Chrysophytes	GU825088.1.1075_U	Alveolates-Dinoflagellates	Dinophyceae	Eukaryota; Alveolata; Dinophyta; Dinophyceae; Dinophyceae_X; Dinophyceae_XX; Dinophyceae_XXX; Dinophyceae_XXX_sp.;	AY129065.1.1781_U	Stramenopiles-Chrysophytes	Chrysophyceae_Clade-H	Eukaryota; Stramenopiles; Ochrophyta; Chrysophyceae; Chrysophyceae_X; Chrysophyceae_Clade-H; Chrysophyceae_Clade-H_X; Chrysophyceae_Clade-H_X_sp.;	-0.792232	-0.792232	-0.792232	1	1	18	0	0.001	-0.803665	3.4e-05	-0.803665	3.4e-05	0	-0.817903	1.9e-05	-0.817903	1.9e-05	0	0.017494	0.000814	0	0.00059	0	6	16
Alveolates-Dinoflagellates_Alveolates-Dinoflagellates	GU825088.1.1075_U	Alveolates-Dinoflagellates	Dinophyceae	Eukaryota; Alveolata; Dinophyta; Dinophyceae; Dinophyceae_X; Dinophyceae_XX; Dinophyceae_XXX; Dinophyceae_XXX_sp.;	EU087269.1.895_U	Alveolates-Dinoflagellates	Pfiesteriaceae	Eukaryota; Alveolata; Dinophyta; Dinophyceae; Dinophyceae_X; Pfiesteriaceae; Pfiesteriaceae_X; Pfiesteriaceae_X_sp.;	0.774657	0.774657	0.774657	1	1	19	0	0	0.861813	2e-06	0.861813	2e-06	0	0.85614	3e-06	0.85614	3e-06	0	0	0.000135	0	0.000186	0	6	22
Alveolates-Dinoflagellates_Alveolates-Ciliates	GU825088.1.1075_U	Alveolates-Dinoflagellates	Dinophyceae	Eukaryota; Alveolata; Dinophyta; Dinophyceae; Dinophyceae_X; Dinophyceae_XX; Dinophyceae_XXX; Dinophyceae_XXX_sp.;	GU819492.1.1175_U	Alveolates-Ciliates	Spirotrichea	Eukaryota; Alveolata; Ciliophora; Spirotrichea; Strombidiida; Strombidiidae_J; Strombidiidae_J_X; Strombidiidae_J_X_sp.;	-0.754733	-0.754733	-0.754733	3	3	17	0	0	-0.77898	8.5e-05	-0.77898	8.5e-05	0	-0.798596	4.1e-05	-0.798596	4.1e-05	0	0	0.001544	0	0.000961	0	6	25
Alveolates-Dinoflagellates_Alveolates-Syndiniales	GU825088.1.1075_U	Alveolates-Dinoflagellates	Dinophyceae	Eukaryota; Alveolata; Dinophyta; Dinophyceae; Dinophyceae_X; Dinophyceae_XX; Dinophyceae_XXX; Dinophyceae_XXX_sp.;	FJ431723.1.830_U	Alveolates-Syndiniales	Dino-Group-III	Eukaryota; Alveolata; Dinophyta; Syndiniales; Dino-Group-III; Dino-Group-III_X; Dino-Group-III_XX; Dino-Group-III_XX_sp.;	0.832593	0.832593	0.832593	3	3	16	0	0	0.850561	4e-06	0.850561	4e-06	0	0.810882	2.5e-05	0.810882	2.5e-05	0	0	0.000197	0	0.000689	0	6	27
Alveolates-Dinoflagellates_Alveolates-Ciliates	GU825088.1.1075_U	Alveolates-Dinoflagellates	Dinophyceae	Eukaryota; Alveolata; Dinophyta; Dinophyceae; Dinophyceae_X; Dinophyceae_XX; Dinophyceae_XXX; Dinophyceae_XXX_sp.;	KJ762491.1.1777_U	Alveolates-Ciliates	Spirotrichea	Eukaryota; Alveolata; Ciliophora; Spirotrichea; Strombidiida; Strombidiidae; Strombidiidae_X; Strombidiidae_X_sp.;	0.7089	0.7089	0.7089	3	3	16	0	0.008	0.616211	0.004962	0.616211	0.004962	0	0.644439	0.002898	0.644439	0.002898	0	0.059414	0.023557	2e-06	0.015789	2e-06	6	30
Alveolates-Dinoflagellates_Alveolates-Dinoflagellates	GU825088.1.1075_U	Alveolates-Dinoflagellates	Dinophyceae	Eukaryota; Alveolata; Dinophyta; Dinophyceae; Dinophyceae_X; Dinophyceae_XX; Dinophyceae_XXX; Dinophyceae_XXX_sp.;	GU825315.1.1202_U	Alveolates-Dinoflagellates	Dinophyceae	Eukaryota; Alveolata; Dinophyta; Dinophyceae; Dinophyceae_X; Dinophyceae_XX; Dinophyceae_XXX; Dinophyceae_XXX_sp.;	0.866907	0.866907	0.866907	2	2	17	0	0	0.919619	0	0.919619	0	0	0.878947	1e-06	0.878947	1e-06	0	0	1.1e-05	0	9e-05	0	6	32
Alveolates-Dinoflagellates_Alveolates-Ciliates	GU825088.1.1075_U	Alveolates-Dinoflagellates	Dinophyceae	Eukaryota; Alveolata; Dinophyta; Dinophyceae; Dinophyceae_X; Dinophyceae_XX; Dinophyceae_XXX; Dinophyceae_XXX_sp.;	KY290313.1.1621_U	Alveolates-Ciliates	Spirotrichea	Eukaryota; Alveolata; Ciliophora; Spirotrichea; Choreotrichida; Leegaardiellidae_B; Leegaardiella; Leegaardiella_sp.;	-0.743312	-0.743312	-0.743312	2	2	17	0	0.003	-0.729724	0.000391	-0.729724	0.000391	0	-0.754502	0.000189	-0.754502	0.000189	0	0.033974	0.004366	1e-06	0.002532	0	6	36
Alveolates-Dinoflagellates_Stramenopiles-MAST	GU825088.1.1075_U	Alveolates-Dinoflagellates	Dinophyceae	Eukaryota; Alveolata; Dinophyta; Dinophyceae; Dinophyceae_X; Dinophyceae_XX; Dinophyceae_XXX; Dinophyceae_XXX_sp.;	JQ782004.1.1784_U	Stramenopiles-MAST	MAST-1	Eukaryota; Stramenopiles; Stramenopiles_X; MAST; MAST-1; MAST-1C; MAST-1C_X; MAST-1C_X_sp.;	0.769919	0.769919	0.769919	3	3	17	0	0.001	0.806904	3e-05	0.806904	3e-05	0	0.776998	9.1e-05	0.776998	9.1e-05	0	0.017494	0.000739	0	0.001601	0	6	37
Alveolates-Dinoflagellates_Stramenopiles-MAST	GU825088.1.1075_U	Alveolates-Dinoflagellates	Dinophyceae	Eukaryota; Alveolata; Dinophyta; Dinophyceae; Dinophyceae_X; Dinophyceae_XX; Dinophyceae_XXX; Dinophyceae_XXX_sp.;	KF129967.1.1739_U	Stramenopiles-MAST	MAST-9	Eukaryota; Stramenopiles; Stramenopiles_X; MAST; MAST-9; MAST-9A; MAST-9A_X; MAST-9A_X_sp.;	-0.850513	-0.850513	-0.850513	1	1	19	0	0	-0.907107	0	-0.907107	0	0	-0.913559	0	-0.913559	0	0	0	2.1e-05	0	1.7e-05	0	6	38
Alveolates-Dinoflagellates_Stramenopiles-MAST	GU825088.1.1075_U	Alveolates-Dinoflagellates	Dinophyceae	Eukaryota; Alveolata; Dinophyta; Dinophyceae; Dinophyceae_X; Dinophyceae_XX; Dinophyceae_XXX; Dinophyceae_XXX_sp.;	HM163291.1.1682_U	Stramenopiles-MAST	MAST-3	Eukaryota; Stramenopiles; Stramenopiles_X; MAST; MAST-3; MAST-3I; MAST-3I_X; MAST-3I_X_sp.;	-0.658445	-0.658445	-0.658445	2	2	15	0	0.025	-0.62448	0.004261	-0.62448	0.004261	0	-0.535088	0.018239	0.632143	0.011458	-4	0.113584	0.021412	2e-06	0.056262	3e-06	6	39
Alveolates-Dinoflagellates_Alveolates-Dinoflagellates	GU825088.1.1075_U	Alveolates-Dinoflagellates	Dinophyceae	Eukaryota; Alveolata; Dinophyta; Dinophyceae; Dinophyceae_X; Dinophyceae_XX; Dinophyceae_XXX; Dinophyceae_XXX_sp.;	KF129831.1.1758_U	Alveolates-Dinoflagellates	Dinophyceae	Eukaryota; Alveolata; Dinophyta; Dinophyceae; Dinophyceae_X; Dinophyceae_XX; Dinophyceae_XXX; Dinophyceae_XXX_sp.;	0.810406	0.810406	0.810406	2	2	17	0	0	0.779531	8.3e-05	0.779531	8.3e-05	0	0.781891	7.7e-05	0.781891	7.7e-05	0	0	0.00152	0	0.001412	0	6	40
Alveolates-Dinoflagellates_Alveolates-Dinoflagellates	GU825088.1.1075_U	Alveolates-Dinoflagellates	Dinophyceae	Eukaryota; Alveolata; Dinophyta; Dinophyceae; Dinophyceae_X; Dinophyceae_XX; Dinophyceae_XXX; Dinophyceae_XXX_sp.;	FJ217814.1.1521_U	Alveolates-Dinoflagellates	Azadinium	Eukaryota; Alveolata; Dinophyta; Dinophyceae; Dinophyceae_X; Dinophyceae_XX; Azadinium; Azadinium_spinosum;	0.766077	0.766077	0.766077	2	2	18	0	0.002	0.776322	9.3e-05	0.776322	9.3e-05	0	0.76437	0.000139	0.76437	0.000139	0	0.026563	0.001642	0	0.002092	0	6	43
Alveolates-Dinoflagellates_Stramenopiles-MAST	GU825088.1.1075_U	Alveolates-Dinoflagellates	Dinophyceae	Eukaryota; Alveolata; Dinophyta; Dinophyceae; Dinophyceae_X; Dinophyceae_XX; Dinophyceae_XXX; Dinophyceae_XXX_sp.;	AB771842.1.1677_U	Stramenopiles-MAST	MAST-2	Eukaryota; Stramenopiles; Stramenopiles_X; MAST; MAST-2; MAST-2A; MAST-2A_X; MAST-2A_X_sp.;	-0.618207	-0.618207	-0.618207	5	1	11	4	0.044	0.286662	0.234095	-0.705814	0.003279	4	0.348639	0.143502	-0.736505	0.001739	4	0.151655	0.271406	2e-06	0.216391	1e-06	6	49
Alveolates-Dinoflagellates_Stramenopiles-Pelagophytes	GU825088.1.1075_U	Alveolates-Dinoflagellates	Dinophyceae	Eukaryota; Alveolata; Dinophyta; Dinophyceae; Dinophyceae_X; Dinophyceae_XX; Dinophyceae_XXX; Dinophyceae_XXX_sp.;	GU196150.1.1374_U	Stramenopiles-Pelagophytes	Pelagomonadaceae_clade_A	Eukaryota; Stramenopiles; Ochrophyta; Pelagophyceae; Pelagomonadales; Pelagomonadaceae; Pelagomonadaceae_clade_A; Pelagomonadaceae_clade_A_sp.;	0.782865	0.782865	0.782865	3	3	17	0	0.001	0.794889	4.8e-05	0.794889	4.8e-05	0	0.8	3.9e-05	0.8	3.9e-05	0	0.017494	0.001062	0	0.00093	0	6	52
Alveolates-Dinoflagellates_Alveolates-Dinoflagellates	GU825088.1.1075_U	Alveolates-Dinoflagellates	Dinophyceae	Eukaryota; Alveolata; Dinophyta; Dinophyceae; Dinophyceae_X; Dinophyceae_XX; Dinophyceae_XXX; Dinophyceae_XXX_sp.;	HM581705.1.1793_U	Alveolates-Dinoflagellates	Dinophyceae	Eukaryota; Alveolata; Dinophyta; Dinophyceae; Dinophyceae_X; Dinophyceae_XX; Dinophyceae_XXX; Dinophyceae_XXX_sp.;	0.641504	0.641504	0.641504	3	3	16	0	0.03	0.548151	0.015105	0.548151	0.015105	0	0.659061	0.002147	0.659061	0.002147	0	0.125466	0.048218	3e-06	0.012878	1e-06	6	55
Alveolates-Dinoflagellates_Stramenopiles-Other	GU825088.1.1075_U	Alveolates-Dinoflagellates	Dinophyceae	Eukaryota; Alveolata; Dinophyta; Dinophyceae; Dinophyceae_X; Dinophyceae_XX; Dinophyceae_XXX; Dinophyceae_XXX_sp.;	EU499990.1.824_U	Stramenopiles-Other	Triparma	Eukaryota; Stramenopiles; Ochrophyta; Bolidophyceae; Parmales; Triparmaceae; Triparma; Triparma_eleuthera;	-0.707019	-0.707019	-0.707019	1	1	19	0	0.005	-0.723235	0.000467	-0.723235	0.000467	0	-0.776998	9.1e-05	-0.776998	9.1e-05	0	0.0456	0.00488	1e-06	0.001601	0	6	59
Alveolates-Dinoflagellates_Stramenopiles-Other	GU825088.1.1075_U	Alveolates-Dinoflagellates	Dinophyceae	Eukaryota; Alveolata; Dinophyta; Dinophyceae; Dinophyceae_X; Dinophyceae_XX; Dinophyceae_XXX; Dinophyceae_XXX_sp.;	EF695122.1.814_U	Stramenopiles-Other	MOCH-2	Eukaryota; Stramenopiles; Stramenopiles_X; MOCH; MOCH-2; MOCH-2_X; MOCH-2_XX; MOCH-2_XX_sp.;	-0.775244	-0.775244	-0.775244	1	1	19	0	0	-0.708811	0.00068	-0.708811	0.00068	0	-0.783488	7.2e-05	-0.783488	7.2e-05	0	0	0.006253	1e-06	0.00137	0	6	60
Alveolates-Dinoflagellates_Stramenopiles-MAST	GU825088.1.1075_U	Alveolates-Dinoflagellates	Dinophyceae	Eukaryota; Alveolata; Dinophyta; Dinophyceae; Dinophyceae_X; Dinophyceae_XX; Dinophyceae_XXX; Dinophyceae_XXX_sp.;	GU823216.1.1365_U	Stramenopiles-MAST	MAST-3	Eukaryota; Stramenopiles; Stramenopiles_X; MAST; MAST-3; MAST-3I; MAST-3I_X; MAST-3I_X_sp.;	-0.744142	-0.744142	-0.744142	2	2	18	0	0.002	-0.745717	0.000247	-0.745717	0.000247	0	-0.733333	0.000353	-0.733333	0.000353	0	0.026563	0.003162	0	0.003814	0	6	61
Alveolates-Dinoflagellates_Stramenopiles-MAST	GU825088.1.1075_U	Alveolates-Dinoflagellates	Dinophyceae	Eukaryota; Alveolata; Dinophyta; Dinophyceae; Dinophyceae_X; Dinophyceae_XX; Dinophyceae_XXX; Dinophyceae_XXX_sp.;	AJ402357.1.1758_U	Stramenopiles-MAST	MAST-3	Eukaryota; Stramenopiles; Stramenopiles_X; MAST; MAST-3; MAST-3A; MAST-3A_X; MAST-3A_X_sp.;	-0.721522	-0.721522	-0.721522	1	1	19	0	0.002	-0.735237	0.000335	-0.735237	0.000335	0	-0.792453	5.2e-05	-0.792453	5.2e-05	0	0.026563	0.003963	0	0.001097	0	6	63
Alveolates-Dinoflagellates_Alveolates-Dinoflagellates	GU825088.1.1075_U	Alveolates-Dinoflagellates	Dinophyceae	Eukaryota; Alveolata; Dinophyta; Dinophyceae; Dinophyceae_X; Dinophyceae_XX; Dinophyceae_XXX; Dinophyceae_XXX_sp.;	HE611580.1.1746_U	Alveolates-Dinoflagellates	Gyrodinium	Eukaryota; Alveolata; Dinophyta; Dinophyceae; Dinophyceae_X; Dinophyceae_XX; Gyrodinium; Gyrodinium_sp.;	0.924278	0.924278	0.924278	1	1	19	0	0	0.909071	0	0.909071	0	0	0.926722	0	0.926722	0	0	0	1.9e-05	0	7e-06	0	6	65
Alveolates-Dinoflagellates_Alveolates-Dinoflagellates	GU825088.1.1075_U	Alveolates-Dinoflagellates	Dinophyceae	Eukaryota; Alveolata; Dinophyta; Dinophyceae; Dinophyceae_X; Dinophyceae_XX; Dinophyceae_XXX; Dinophyceae_XXX_sp.;	HM581766.1.1782_U	Alveolates-Dinoflagellates	Prorocentrum	Eukaryota; Alveolata; Dinophyta; Dinophyceae; Dinophyceae_X; Dinophyceae_XX; Prorocentrum; Prorocentrum_sp.;	0.785937	0.785937	0.785937	3	3	17	0	0.001	0.775172	9.7e-05	0.775172	9.7e-05	0	0.824561	1.4e-05	0.824561	1.4e-05	0	0.017494	0.001676	0	0.000496	0	6	66
Alveolates-Dinoflagellates_Alveolates-Ciliates	GU825088.1.1075_U	Alveolates-Dinoflagellates	Dinophyceae	Eukaryota; Alveolata; Dinophyta; Dinophyceae; Dinophyceae_X; Dinophyceae_XX; Dinophyceae_XXX; Dinophyceae_XXX_sp.;	JX188331.1.1726_U	Alveolates-Ciliates	Oligohymenophorea	Eukaryota; Alveolata; Ciliophora; Oligohymenophorea; Scuticociliatia; Scuticociliatia-1; Scuticociliatia-1_X; Scuticociliatia-1_X_sp.;	-0.767748	-0.767748	-0.767748	3	3	17	0	0.001	-0.874343	1e-06	-0.874343	1e-06	0	-0.815789	2.1e-05	-0.815789	2.1e-05	0	0.017494	8.4e-05	0	0.000604	0	6	69
Alveolates-Dinoflagellates_Alveolates-Dinoflagellates	GU825088.1.1075_U	Alveolates-Dinoflagellates	Dinophyceae	Eukaryota; Alveolata; Dinophyta; Dinophyceae; Dinophyceae_X; Dinophyceae_XX; Dinophyceae_XXX; Dinophyceae_XXX_sp.;	HM561067.1.974_U	Alveolates-Dinoflagellates	Dinophyceae	Eukaryota; Alveolata; Dinophyta; Dinophyceae; Dinophyceae_X; Dinophyceae_XX; Dinophyceae_XXX; Dinophyceae_XXX_sp.;	-0.622063	-0.622063	-0.622063	3	3	17	0	0.044	-0.594592	0.007253	-0.633982	0.01997	6	-0.668421	0.001757	-0.668421	0.001757	0	0.151655	0.030231	4e-06	0.0112	1e-06	6	71
Alveolates-Dinoflagellates_Alveolates-Ciliates	GU825088.1.1075_U	Alveolates-Dinoflagellates	Dinophyceae	Eukaryota; Alveolata; Dinophyta; Dinophyceae; Dinophyceae_X; Dinophyceae_XX; Dinophyceae_XXX; Dinophyceae_XXX_sp.;	AY665059.1.1720_U	Alveolates-Ciliates	Oligohymenophorea	Eukaryota; Alveolata; Ciliophora; Oligohymenophorea; Scuticociliatia; Scuticociliatia-1; Scuticociliatia-1_X; Scuticociliatia-1_X_sp.;	-0.789641	-0.789641	-0.789641	3	3	17	0	0	-0.856637	3e-06	-0.856637	3e-06	0	-0.86968	1e-06	-0.86968	1e-06	0	0	0.000163	0	0.00012	0	6	77
Alveolates-Dinoflagellates_Rhizaria-Acantharia	GU825088.1.1075_U	Alveolates-Dinoflagellates	Dinophyceae	Eukaryota; Alveolata; Dinophyta; Dinophyceae; Dinophyceae_X; Dinophyceae_XX; Dinophyceae_XXX; Dinophyceae_XXX_sp.;	HM561210.1.973_U	Rhizaria-Acantharia	Acantharea	Eukaryota; Rhizaria; Radiolaria; Acantharea; Acantharea_X; Acantharea_XX; Acantharea_XXX; Acantharea_XXX_sp.;	-0.824098	-0.824098	-0.824098	1	1	19	0	0	-0.894519	0	-0.894519	0	0	-0.884599	0	-0.884599	0	0	0	4.1e-05	0	7.5e-05	0	6	80
Alveolates-Dinoflagellates_Alveolates-Dinoflagellates	GU825088.1.1075_U	Alveolates-Dinoflagellates	Dinophyceae	Eukaryota; Alveolata; Dinophyta; Dinophyceae; Dinophyceae_X; Dinophyceae_XX; Dinophyceae_XXX; Dinophyceae_XXX_sp.;	GU825043.1.1199_U	Alveolates-Dinoflagellates	Dinophyceae	Eukaryota; Alveolata; Dinophyta; Dinophyceae; Dinophyceae_X; Dinophyceae_XX; Dinophyceae_XXX; Dinophyceae_XXX_sp.;	0.610479	0.610479	0.610479	3	4	16	-1	0.044	0.274052	0.256219	0.612858	0.019791	5	0.295938	0.218631	0.587836	0.0103	-1	0.151655	0.286252	4e-06	0.280266	3e-06	6	83
Alveolates-Dinoflagellates_Archaeplastids-Chlorophytes	GU825088.1.1075_U	Alveolates-Dinoflagellates	Dinophyceae	Eukaryota; Alveolata; Dinophyta; Dinophyceae; Dinophyceae_X; Dinophyceae_XX; Dinophyceae_XXX; Dinophyceae_XXX_sp.;	EU143529.1.906_U	Archaeplastids-Chlorophytes	Pyramimonadales	Eukaryota; Archaeplastida; Chlorophyta; Pyramimonadales; Pyramimonadales_X; Pyramimonadales_XX; Pterosperma; Pterosperma_sp.;	0.696971	0.696971	0.696971	3	3	17	0	0.006	0.659356	0.002134	0.659356	0.002134	0	0.760316	0.000158	0.760316	0.000158	0	0.050667	0.013596	1e-06	0.00227	0	6	84
Alveolates-Dinoflagellates_Alveolates-Ciliates	GU825088.1.1075_U	Alveolates-Dinoflagellates	Dinophyceae	Eukaryota; Alveolata; Dinophyta; Dinophyceae; Dinophyceae_X; Dinophyceae_XX; Dinophyceae_XXX; Dinophyceae_XXX_sp.;	KJ759492.1.1752_U	Alveolates-Ciliates	Phyllopharyngea	Eukaryota; Alveolata; Ciliophora; Phyllopharyngea; Cyrtophoria; Chlamydodontidae; Chlamydodon; Chlamydodon_sp.;	-0.667633	-0.667633	-0.667633	5	5	15	0	0.017	-0.517161	0.023358	0.631315	0.0116	4	-0.561404	0.01238	0.608791	0.020857	5	0.091523	0.06469	3e-06	0.043119	4e-06	6	93
Alveolates-Dinoflagellates_Alveolates-Dinoflagellates	GU825088.1.1075_U	Alveolates-Dinoflagellates	Dinophyceae	Eukaryota; Alveolata; Dinophyta; Dinophyceae; Dinophyceae_X; Dinophyceae_XX; Dinophyceae_XXX; Dinophyceae_XXX_sp.;	EU793087.1.924_U	Alveolates-Dinoflagellates	Dinophyceae	Eukaryota; Alveolata; Dinophyta; Dinophyceae; Dinophyceae_X; Dinophyceae_XX; Dinophyceae_XXX; Dinophyceae_XXX_sp.;	0.924202	0.924202	0.924202	1	1	19	0	0	0.932673	0	0.932673	0	0	0.940351	0	0.940351	0	0	0	6e-06	0	3e-06	0	6	97
Alveolates-Dinoflagellates_Alveolates-Syndiniales	GU825088.1.1075_U	Alveolates-Dinoflagellates	Dinophyceae	Eukaryota; Alveolata; Dinophyta; Dinophyceae; Dinophyceae_X; Dinophyceae_XX; Dinophyceae_XXX; Dinophyceae_XXX_sp.;	EF172977.1.1676_U	Alveolates-Syndiniales	Dino-Group-II	Eukaryota; Alveolata; Dinophyta; Syndiniales; Dino-Group-II; Dino-Group-II-Clade-7; Dino-Group-II-Clade-7_X; Dino-Group-II-Clade-7_X_sp.;	-0.62158	-0.62158	-0.62158	1	2	15	-1	0.045	-0.414049	0.078009	-0.665033	0.0026	-1	-0.4741	0.040294	-0.622934	0.005753	-1	0.153058	0.139092	1e-06	0.095498	2e-06	6	100
Alveolates-Dinoflagellates_Alveolates-Ciliates	GU825088.1.1075_U	Alveolates-Dinoflagellates	Dinophyceae	Eukaryota; Alveolata; Dinophyta; Dinophyceae; Dinophyceae_X; Dinophyceae_XX; Dinophyceae_XXX; Dinophyceae_XXX_sp.;	HQ867071.1.870_U	Alveolates-Ciliates	Spirotrichea	Eukaryota; Alveolata; Ciliophora; Spirotrichea; Strombidiida_G; Strombidiida_G_X; Strombidiida_G_XX; Strombidiida_G_XX_sp.;	0.712819	0.712819	0.712819	3	3	17	0	0.005	0.709833	0.000663	0.709833	0.000663	0	0.712593	0.000618	0.712593	0.000618	0	0.0456	0.006132	1e-06	0.005531	1e-06	6	106
Alveolates-Dinoflagellates_Stramenopiles-MAST	GU825088.1.1075_U	Alveolates-Dinoflagellates	Dinophyceae	Eukaryota; Alveolata; Dinophyta; Dinophyceae; Dinophyceae_X; Dinophyceae_XX; Dinophyceae_XXX; Dinophyceae_XXX_sp.;	EU499985.1.853_U	Stramenopiles-MAST	MAST-7	Eukaryota; Stramenopiles; Stramenopiles_X; MAST; MAST-7; MAST-7B; MAST-7B_X; MAST-7B_X_sp.;	0.634505	0.634505	0.634505	3	3	17	0	0.047	0.575188	0.009981	0.575188	0.009981	0	0.685965	0.001185	0.685965	0.001185	0	0.156743	0.03732	3e-06	0.008653	1e-06	6	110
Alveolates-Dinoflagellates_Alveolates-Dinoflagellates	GU825088.1.1075_U	Alveolates-Dinoflagellates	Dinophyceae	Eukaryota; Alveolata; Dinophyta; Dinophyceae; Dinophyceae_X; Dinophyceae_XX; Dinophyceae_XXX; Dinophyceae_XXX_sp.;	AY664921.1.1754_U	Alveolates-Dinoflagellates	Prorocentrum	Eukaryota; Alveolata; Dinophyta; Dinophyceae; Dinophyceae_X; Dinophyceae_XX; Prorocentrum; Prorocentrum_sp.;	0.885327	0.885327	0.885327	3	3	17	0	0	0.736367	0.000324	0.736367	0.000324	0	0.887231	0	0.887231	0	0	0	0.00388	0	6.6e-05	0	6	111
Alveolates-Dinoflagellates_Alveolates-Ciliates	GU825088.1.1075_U	Alveolates-Dinoflagellates	Dinophyceae	Eukaryota; Alveolata; Dinophyta; Dinophyceae; Dinophyceae_X; Dinophyceae_XX; Dinophyceae_XXX; Dinophyceae_XXX_sp.;	DQ120009.1.1729_U	Alveolates-Ciliates	Litostomatea	Eukaryota; Alveolata; Ciliophora; Litostomatea; Cyclotrichia; Cyclotrichia_X; Cyclotrichia_XX; Cyclotrichia_XX_sp.;	-0.83018	-0.83018	-0.83018	3	3	17	0	0	-0.845009	5e-06	-0.845009	5e-06	0	-0.87193	1e-06	-0.87193	1e-06	0	0	0.00024	0	0.000114	0	6	113
Alveolates-Dinoflagellates_Alveolates-Dinoflagellates	GU825088.1.1075_U	Alveolates-Dinoflagellates	Dinophyceae	Eukaryota; Alveolata; Dinophyta; Dinophyceae; Dinophyceae_X; Dinophyceae_XX; Dinophyceae_XXX; Dinophyceae_XXX_sp.;	AY664894.1.1756_U	Alveolates-Dinoflagellates	Dinophyceae	Eukaryota; Alveolata; Dinophyta; Dinophyceae; Dinophyceae_X; Dinophyceae_XX; Dinophyceae_XXX; Dinophyceae_XXX_sp.;	0.708588	0.708588	0.708588	2	2	18	0	0.001	0.8303	1.1e-05	0.8303	1.1e-05	0	0.735088	0.000336	0.735088	0.000336	0	0.017494	0.000378	0	0.003688	0	6	117
Alveolates-Dinoflagellates_Alveolates-Dinoflagellates	GU825088.1.1075_U	Alveolates-Dinoflagellates	Dinophyceae	Eukaryota; Alveolata; Dinophyta; Dinophyceae; Dinophyceae_X; Dinophyceae_XX; Dinophyceae_XXX; Dinophyceae_XXX_sp.;	FN690221.1.1692_U	Alveolates-Dinoflagellates	Dinophyceae	Eukaryota; Alveolata; Dinophyta; Dinophyceae; Dinophyceae_X; Dinophyceae_XX; Dinophyceae_XXX; Dinophyceae_XXX_sp.;	0.779685	0.779685	0.779685	3	3	17	0	0	0.595561	0.007135	0.595561	0.007135	0	0.812281	2.4e-05	0.812281	2.4e-05	0	0	0.029903	2e-06	0.000665	0	6	118
Alveolates-Dinoflagellates_Stramenopiles-MAST	GU825088.1.1075_U	Alveolates-Dinoflagellates	Dinophyceae	Eukaryota; Alveolata; Dinophyta; Dinophyceae; Dinophyceae_X; Dinophyceae_XX; Dinophyceae_XXX; Dinophyceae_XXX_sp.;	KC582992.1.1792_U	Stramenopiles-MAST	MAST-3	Eukaryota; Stramenopiles; Stramenopiles_X; MAST; MAST-3; MAST-3L; MAST-3L_X; MAST-3L_X_sp.;	-0.78638	-0.78638	-0.78638	3	3	17	0	0	-0.781361	7.8e-05	-0.781361	7.8e-05	0	-0.817025	2e-05	-0.817025	2e-05	0	0	0.001453	0	0.00059	0	6	119
Alveolates-Dinoflagellates_Stramenopiles-Other	GU825088.1.1075_U	Alveolates-Dinoflagellates	Dinophyceae	Eukaryota; Alveolata; Dinophyta; Dinophyceae; Dinophyceae_X; Dinophyceae_XX; Dinophyceae_XXX; Dinophyceae_XXX_sp.;	EF695169.1.817_U	Stramenopiles-Other	Florenciellales	Eukaryota; Stramenopiles; Ochrophyta; Dictyochophyceae; Dictyochophyceae_X; Florenciellales; Florenciellales_X; Florenciellales_X_sp.;	0.714145	0.714145	0.714145	1	1	19	0	0.003	0.861427	2e-06	0.861427	2e-06	0	0.790698	5.6e-05	0.790698	5.6e-05	0	0.033974	0.000136	0	0.001146	0	6	121
Alveolates-Dinoflagellates_Stramenopiles-Other	GU825088.1.1075_U	Alveolates-Dinoflagellates	Dinophyceae	Eukaryota; Alveolata; Dinophyta; Dinophyceae; Dinophyceae_X; Dinophyceae_XX; Dinophyceae_XXX; Dinophyceae_XXX_sp.;	EU500153.1.840_U	Stramenopiles-Other	Rhizochromulinales	Eukaryota; Stramenopiles; Ochrophyta; Dictyochophyceae; Dictyochophyceae_X; Rhizochromulinales; Rhizochromulinales_X; Rhizochromulinales_X_sp.;	-0.636849	-0.636849	-0.636849	3	1	13	2	0.041	0.015431	0.950006	-0.526301	0.029987	2	-0.081903	0.738885	-0.59287	0.012134	2	0.146981	0.565686	5e-06	0.544425	3e-06	6	123
Alveolates-Dinoflagellates_Haptophytes	GU825088.1.1075_U	Alveolates-Dinoflagellates	Dinophyceae	Eukaryota; Alveolata; Dinophyta; Dinophyceae; Dinophyceae_X; Dinophyceae_XX; Dinophyceae_XXX; Dinophyceae_XXX_sp.;	HG970975	Haptophytes	Haptophyta	Eukaryota; Hacrobia; Haptophyta; Haptophyta_X; Haptophyta_XX; Haptophyta_XXX; Haptophyta_XXXX; Haptophyta_XXXX_sp.;	0.807104	0.807104	0.807104	1	1	19	0	0	0.834332	9e-06	0.834332	9e-06	0	0.81878	1.8e-05	0.81878	1.8e-05	0	0	0.00034	0	0.000577	0	6	126
Alveolates-Dinoflagellates_Alveolates-Ciliates	GU825088.1.1075_U	Alveolates-Dinoflagellates	Dinophyceae	Eukaryota; Alveolata; Dinophyta; Dinophyceae; Dinophyceae_X; Dinophyceae_XX; Dinophyceae_XXX; Dinophyceae_XXX_sp.;	FJ422993.1.1778_U	Alveolates-Ciliates	Spirotrichea	Eukaryota; Alveolata; Ciliophora; Spirotrichea; Strombidiida; Tontoniidae_B; Pseudotontonia; Pseudotontonia_simplicidens;	0.725556	0.725556	0.725556	2	2	17	0	0.002	0.644148	0.002914	0.644148	0.002914	0	0.65614	0.002282	0.65614	0.002282	0	0.026563	0.016652	2e-06	0.013509	1e-06	6	129
Alveolates-Dinoflagellates_Alveolates-Syndiniales	GU825088.1.1075_U	Alveolates-Dinoflagellates	Dinophyceae	Eukaryota; Alveolata; Dinophyta; Dinophyceae; Dinophyceae_X; Dinophyceae_XX; Dinophyceae_XXX; Dinophyceae_XXX_sp.;	HQ870498.1.849_U	Alveolates-Syndiniales	Dino-Group-III	Eukaryota; Alveolata; Dinophyta; Syndiniales; Dino-Group-III; Dino-Group-III_X; Dino-Group-III_XX; Dino-Group-III_XX_sp.;	0.817704	0.817704	0.817704	1	1	18	0	0.001	0.853925	3e-06	0.853925	3e-06	0	0.815467	2.1e-05	0.815467	2.1e-05	0	0.017494	0.000176	0	0.000606	0	6	132
Alveolates-Dinoflagellates_Alveolates-Syndiniales	GU825088.1.1075_U	Alveolates-Dinoflagellates	Dinophyceae	Eukaryota; Alveolata; Dinophyta; Dinophyceae; Dinophyceae_X; Dinophyceae_XX; Dinophyceae_XXX; Dinophyceae_XXX_sp.;	GU824677.1.1204_U	Alveolates-Syndiniales	Dino-Group-II	Eukaryota; Alveolata; Dinophyta; Syndiniales; Dino-Group-II; Dino-Group-II-Clade-10-and-11; Dino-Group-II-Clade-10-and-11_X; Dino-Group-II-Clade-10-and-11_X_sp.;	-0.767174	-0.767174	-0.767174	3	3	17	0	0	-0.58067	0.009138	-0.58067	0.009138	0	-0.782265	7.6e-05	-0.782265	7.6e-05	0	0	0.035185	3e-06	0.001399	0	6	135
Alveolates-Dinoflagellates_Stramenopiles-MAST	GU825088.1.1075_U	Alveolates-Dinoflagellates	Dinophyceae	Eukaryota; Alveolata; Dinophyta; Dinophyceae; Dinophyceae_X; Dinophyceae_XX; Dinophyceae_XXX; Dinophyceae_XXX_sp.;	KF130206.1.1737_U	Stramenopiles-MAST	MAST-3	Eukaryota; Stramenopiles; Stramenopiles_X; MAST; MAST-3; MAST-3I; MAST-3I_X; MAST-3I_X_sp.;	0.629224	0.629224	0.629224	4	8	12	-4	0.023	-0.418898	0.074242	-0.652068	0.015726	6	-0.53029	0.019512	-0.563962	0.044697	6	0.108834	0.134863	3e-06	0.059112	6e-06	6	137
Alveolates-Dinoflagellates_Stramenopiles-Diatoms	GU825088.1.1075_U	Alveolates-Dinoflagellates	Dinophyceae	Eukaryota; Alveolata; Dinophyta; Dinophyceae; Dinophyceae_X; Dinophyceae_XX; Dinophyceae_XXX; Dinophyceae_XXX_sp.;	GU822947.1.1074_U	Stramenopiles-Diatoms	Haslea	Eukaryota; Stramenopiles; Ochrophyta; Bacillariophyta; Bacillariophyta_X; Raphid-pennate; Haslea; Haslea_sp.;	-0.676773	-0.676773	-0.676773	4	4	16	0	0.007	-0.67667	0.001465	-0.67667	0.001465	0	-0.690079	0.001076	-0.690079	0.001076	0	0.055193	0.010502	1e-06	0.008111	1e-06	6	139
Alveolates-Dinoflagellates_Stramenopiles-Chrysophytes	GU825088.1.1075_U	Alveolates-Dinoflagellates	Dinophyceae	Eukaryota; Alveolata; Dinophyta; Dinophyceae; Dinophyceae_X; Dinophyceae_XX; Dinophyceae_XXX; Dinophyceae_XXX_sp.;	KC582997.1.1775_U	Stramenopiles-Chrysophytes	Chrysophyceae_Clade-I	Eukaryota; Stramenopiles; Ochrophyta; Chrysophyceae; Chrysophyceae_X; Chrysophyceae_Clade-I; Chrysophyceae_Clade-I_X; Chrysophyceae_Clade-I_X_sp.;	-0.825275	-0.825275	-0.825275	3	3	17	0	0	-0.894182	0	-0.894182	0	0	-0.893281	0	-0.893281	0	0	0	4.1e-05	0	4.9e-05	0	6	142
Alveolates-Dinoflagellates_Stramenopiles-Diatoms	GU825088.1.1075_U	Alveolates-Dinoflagellates	Dinophyceae	Eukaryota; Alveolata; Dinophyta; Dinophyceae; Dinophyceae_X; Dinophyceae_XX; Dinophyceae_XXX; Dinophyceae_XXX_sp.;	EU499988.1.803_U	Stramenopiles-Diatoms	Raphid-pennate	Eukaryota; Stramenopiles; Ochrophyta; Bacillariophyta; Bacillariophyta_X; Raphid-pennate; Raphid-pennate_X; Raphid-pennate_X_sp.;	-0.873606	-0.873606	-0.873606	1	1	19	0	0	-0.831623	1e-05	-0.831623	1e-05	0	-0.878947	1e-06	-0.878947	1e-06	0	0	0.000369	0	9e-05	0	6	145
Alveolates-Dinoflagellates_Cryptophytes	GU825088.1.1075_U	Alveolates-Dinoflagellates	Dinophyceae	Eukaryota; Alveolata; Dinophyta; Dinophyceae; Dinophyceae_X; Dinophyceae_XX; Dinophyceae_XXX; Dinophyceae_XXX_sp.;	GQ863814.1.1651_U	Cryptophytes	Other-unclassified	Eukaryota; Hacrobia; Cryptophyta; Cryptophyceae; Cryptophyceae_X; Goniomonadales; Goniomonas; Goniomonas_sp.;	0.682696	0.682696	0.682696	2	2	18	0	0.01	0.650718	0.002552	0.650718	0.002552	0	0.714348	0.00059	0.714348	0.00059	0	0.067958	0.015216	1e-06	0.005381	1e-06	6	146
Alveolates-Dinoflagellates_Stramenopiles-MAST	GU825088.1.1075_U	Alveolates-Dinoflagellates	Dinophyceae	Eukaryota; Alveolata; Dinophyta; Dinophyceae; Dinophyceae_X; Dinophyceae_XX; Dinophyceae_XXX; Dinophyceae_XXX_sp.;	AJ402350.1.1758_U	Stramenopiles-MAST	MAST-1	Eukaryota; Stramenopiles; Stramenopiles_X; MAST; MAST-1; MAST-1D; MAST-1D_X; MAST-1D_X_sp.;	0.799154	0.799154	0.799154	3	3	17	0	0.001	0.879914	1e-06	0.879914	1e-06	0	0.868802	1e-06	0.868802	1e-06	0	0.017494	7.1e-05	0	0.000123	0	6	150
Alveolates-Dinoflagellates_is2AM	GU825088.1.1075_U	Alveolates-Dinoflagellates	Dinophyceae	Eukaryota; Alveolata; Dinophyta; Dinophyceae; Dinophyceae_X; Dinophyceae_XX; Dinophyceae_XXX; Dinophyceae_XXX_sp.;	is2AM	is2AM	NA	NA	0.625445	0.625445	0.625445	4	1	15	3	0.03	-0.220881	0.363491	-0.593911	0.041735	7	-0.184466	0.449646	0.677365	0.003942	3	0.125466	0.347896	5e-06	0.422258	2e-06	6	210
Alveolates-Dinoflagellates_is6AM	GU825088.1.1075_U	Alveolates-Dinoflagellates	Dinophyceae	Eukaryota; Alveolata; Dinophyta; Dinophyceae; Dinophyceae_X; Dinophyceae_XX; Dinophyceae_XXX; Dinophyceae_XXX_sp.;	is6AM	is6AM	NA	NA	0.668841	0.668841	0.668841	3	1	16	2	0.014	-0.431367	0.065176	0.562111	0.018847	2	-0.421637	0.072175	0.661438	0.003833	2	0.081741	0.124514	4e-06	0.139973	2e-06	6	211
Alveolates-Dinoflagellates_is10AM	GU825088.1.1075_U	Alveolates-Dinoflagellates	Dinophyceae	Eukaryota; Alveolata; Dinophyta; Dinophyceae; Dinophyceae_X; Dinophyceae_XX; Dinophyceae_XXX; Dinophyceae_XXX_sp.;	is10AM	is10AM	NA	NA	0.668841	0.668841	0.668841	3	2	16	1	0.013	0.072591	0.767746	0.584523	0.028143	-5	0.026352	0.91472	0.64775	0.022752	7	0.078309	0.51504	4e-06	0.600804	4e-06	6	212
Alveolates-Dinoflagellates_is2PM	GU825088.1.1075_U	Alveolates-Dinoflagellates	Dinophyceae	Eukaryota; Alveolata; Dinophyta; Dinophyceae; Dinophyceae_X; Dinophyceae_XX; Dinophyceae_XXX; Dinophyceae_XXX_sp.;	is2PM	is2PM	NA	NA	0.668841	0.668841	0.668841	3	3	16	0	0.015	0.533187	0.018735	0.640993	0.018234	-6	0.632456	0.003664	0.632456	0.003664	0	0.085181	0.05563	4e-06	0.018467	2e-06	6	213
Alveolates-Ciliates_Alveolates-Dinoflagellates	KC488375.1.1634_U	Alveolates-Ciliates	Colpodea	Eukaryota; Alveolata; Ciliophora; Colpodea; Colpodea-1; Colpodea-1_X; Colpodea-1_XX; Colpodea-1_XX_sp.;	EF527080.1.1343_U	Alveolates-Dinoflagellates	Dinophyceae	Eukaryota; Alveolata; Dinophyta; Dinophyceae; Dinophyceae_X; Dinophyceae_XX; Dinophyceae_XXX; Dinophyceae_XXX_sp.;	0.64971	0.64971	0.64971	2	3	14	-1	0.029	-0.277009	0.250916	0.657675	0.003013	-1	-0.359649	0.130437	0.536765	0.026312	-2	0.123397	0.282744	2e-06	0.2035	5e-06	8	9
Alveolates-Ciliates_Alveolates-Ciliates	KC488375.1.1634_U	Alveolates-Ciliates	Colpodea	Eukaryota; Alveolata; Ciliophora; Colpodea; Colpodea-1; Colpodea-1_X; Colpodea-1_XX; Colpodea-1_XX_sp.;	KJ763611.1.1765_U	Alveolates-Ciliates	Oligohymenophorea	Eukaryota; Alveolata; Ciliophora; Oligohymenophorea; Scuticociliatia; Scuticociliatia-1; Scuticociliatia-1_X; Scuticociliatia-1_X_sp.;	0.711627	0.711627	0.711627	3	3	16	0	0.005	0.619333	0.004687	0.619333	0.004687	0	0.587977	0.008105	0.587977	0.008105	0	0.0456	0.022703	2e-06	0.031919	3e-06	8	10
Alveolates-Ciliates_Stramenopiles-Chrysophytes	KC488375.1.1634_U	Alveolates-Ciliates	Colpodea	Eukaryota; Alveolata; Ciliophora; Colpodea; Colpodea-1; Colpodea-1_X; Colpodea-1_XX; Colpodea-1_XX_sp.;	AY129065.1.1781_U	Stramenopiles-Chrysophytes	Chrysophyceae_Clade-H	Eukaryota; Stramenopiles; Ochrophyta; Chrysophyceae; Chrysophyceae_X; Chrysophyceae_Clade-H; Chrysophyceae_Clade-H_X; Chrysophyceae_Clade-H_X_sp.;	0.727414	0.727414	0.727414	2	2	18	0	0.003	0.733926	0.000348	0.733926	0.000348	0	0.803861	3.4e-05	0.803861	3.4e-05	0	0.033974	0.004055	0	0.000848	0	8	16
Alveolates-Ciliates_Stramenopiles-Chrysophytes	KC488375.1.1634_U	Alveolates-Ciliates	Colpodea	Eukaryota; Alveolata; Ciliophora; Colpodea; Colpodea-1; Colpodea-1_X; Colpodea-1_XX; Colpodea-1_XX_sp.;	KC583138.1.1098_U	Stramenopiles-Chrysophytes	Chrysophyceae_Clade-H	Eukaryota; Stramenopiles; Ochrophyta; Chrysophyceae; Chrysophyceae_X; Chrysophyceae_Clade-H; Chrysophyceae_Clade-H_X; Chrysophyceae_Clade-H_X_sp.;	0.676396	0.676396	0.676396	3	3	17	0	0.011	0.644523	0.002893	0.644523	0.002893	0	0.682178	0.001293	0.682178	0.001293	0	0.071521	0.016571	2e-06	0.009162	1e-06	8	20
Alveolates-Ciliates_Alveolates-Syndiniales	KC488375.1.1634_U	Alveolates-Ciliates	Colpodea	Eukaryota; Alveolata; Ciliophora; Colpodea; Colpodea-1; Colpodea-1_X; Colpodea-1_XX; Colpodea-1_XX_sp.;	FJ431723.1.830_U	Alveolates-Syndiniales	Dino-Group-III	Eukaryota; Alveolata; Dinophyta; Syndiniales; Dino-Group-III; Dino-Group-III_X; Dino-Group-III_XX; Dino-Group-III_XX_sp.;	-0.674849	-0.674849	-0.674849	2	1	14	1	0.013	-0.447114	0.054944	-0.629522	0.005119	1	-0.484423	0.035566	-0.677336	0.002014	1	0.078309	0.11214	2e-06	0.088254	1e-06	8	27
Alveolates-Ciliates_Alveolates-Syndiniales	KC488375.1.1634_U	Alveolates-Ciliates	Colpodea	Eukaryota; Alveolata; Ciliophora; Colpodea; Colpodea-1; Colpodea-1_X; Colpodea-1_XX; Colpodea-1_XX_sp.;	KF130214.1.1759_U	Alveolates-Syndiniales	Dino-Group-II	Eukaryota; Alveolata; Dinophyta; Syndiniales; Dino-Group-II; Dino-Group-II-Clade-10-and-11; Dino-Group-II-Clade-10-and-11_X; Dino-Group-II-Clade-10-and-11_X_sp.;	0.668839	0.668839	0.668839	4	1	16	3	0.025	0.137737	0.573903	0.728988	0.001356	3	0.192613	0.429515	0.73506	0.001178	3	0.113584	0.445058	1e-06	0.412596	1e-06	8	33
Alveolates-Ciliates_Alveolates-Ciliates	KC488375.1.1634_U	Alveolates-Ciliates	Colpodea	Eukaryota; Alveolata; Ciliophora; Colpodea; Colpodea-1; Colpodea-1_X; Colpodea-1_XX; Colpodea-1_XX_sp.;	KY290313.1.1621_U	Alveolates-Ciliates	Spirotrichea	Eukaryota; Alveolata; Ciliophora; Spirotrichea; Choreotrichida; Leegaardiellidae_B; Leegaardiella; Leegaardiella_sp.;	0.734977	0.734977	0.734977	1	1	19	0	0.003	0.728119	0.000409	0.728119	0.000409	0	0.766799	0.000128	0.766799	0.000128	0	0.033974	0.004473	1e-06	0.001984	0	8	36
Alveolates-Ciliates_Stramenopiles-MAST	KC488375.1.1634_U	Alveolates-Ciliates	Colpodea	Eukaryota; Alveolata; Ciliophora; Colpodea; Colpodea-1; Colpodea-1_X; Colpodea-1_XX; Colpodea-1_XX_sp.;	KF129967.1.1739_U	Stramenopiles-MAST	MAST-9	Eukaryota; Stramenopiles; Stramenopiles_X; MAST; MAST-9; MAST-9A; MAST-9A_X; MAST-9A_X_sp.;	0.618146	0.618146	0.618146	3	3	16	0	0.044	0.62197	0.004465	0.62197	0.004465	0	0.655551	0.00231	0.655551	0.00231	0	0.151655	0.021993	2e-06	0.013626	1e-06	8	38
Alveolates-Ciliates_Stramenopiles-Pelagophytes	KC488375.1.1634_U	Alveolates-Ciliates	Colpodea	Eukaryota; Alveolata; Ciliophora; Colpodea; Colpodea-1; Colpodea-1_X; Colpodea-1_XX; Colpodea-1_XX_sp.;	GU196150.1.1374_U	Stramenopiles-Pelagophytes	Pelagomonadaceae_clade_A	Eukaryota; Stramenopiles; Ochrophyta; Pelagophyceae; Pelagomonadales; Pelagomonadaceae; Pelagomonadaceae_clade_A; Pelagomonadaceae_clade_A_sp.;	-0.626365	-0.626365	-0.626365	3	2	13	1	0.044	-0.310914	0.195102	0.588559	0.026816	5	-0.37193	0.116879	-0.529412	0.023858	1	0.151655	0.244158	4e-06	0.190155	4e-06	8	52
Alveolates-Ciliates_Alveolates-Dinoflagellates	KC488375.1.1634_U	Alveolates-Ciliates	Colpodea	Eukaryota; Alveolata; Ciliophora; Colpodea; Colpodea-1; Colpodea-1_X; Colpodea-1_XX; Colpodea-1_XX_sp.;	HM581705.1.1793_U	Alveolates-Dinoflagellates	Dinophyceae	Eukaryota; Alveolata; Dinophyta; Dinophyceae; Dinophyceae_X; Dinophyceae_XX; Dinophyceae_XXX; Dinophyceae_XXX_sp.;	0.623949	0.623949	0.623949	1	2	16	-1	0.041	-0.159746	0.513589	0.770369	0.000184	-1	-0.258008	0.286211	0.629371	0.02832	-7	0.146981	0.421623	0	0.328832	5e-06	8	55
Alveolates-Ciliates_Stramenopiles-Other	KC488375.1.1634_U	Alveolates-Ciliates	Colpodea	Eukaryota; Alveolata; Ciliophora; Colpodea; Colpodea-1; Colpodea-1_X; Colpodea-1_XX; Colpodea-1_XX_sp.;	EU499990.1.824_U	Stramenopiles-Other	Triparma	Eukaryota; Stramenopiles; Ochrophyta; Bolidophyceae; Parmales; Triparmaceae; Triparma; Triparma_eleuthera;	0.653935	0.653935	0.653935	3	3	16	0	0.029	0.569292	0.010956	0.569292	0.010956	0	0.62072	0.004569	0.62072	0.004569	0	0.123397	0.039378	3e-06	0.021378	2e-06	8	59
Alveolates-Ciliates_Stramenopiles-MAST	KC488375.1.1634_U	Alveolates-Ciliates	Colpodea	Eukaryota; Alveolata; Ciliophora; Colpodea; Colpodea-1; Colpodea-1_X; Colpodea-1_XX; Colpodea-1_XX_sp.;	AJ402357.1.1758_U	Stramenopiles-MAST	MAST-3	Eukaryota; Stramenopiles; Stramenopiles_X; MAST; MAST-3; MAST-3A; MAST-3A_X; MAST-3A_X_sp.;	0.755371	0.755371	0.755371	2	2	17	0	0.002	0.730772	0.00038	0.730772	0.00038	0	0.766126	0.000131	0.766126	0.000131	0	0.026563	0.004283	1e-06	0.002012	0	8	63
Alveolates-Ciliates_Alveolates-Ciliates	KC488375.1.1634_U	Alveolates-Ciliates	Colpodea	Eukaryota; Alveolata; Ciliophora; Colpodea; Colpodea-1; Colpodea-1_X; Colpodea-1_XX; Colpodea-1_XX_sp.;	JX188331.1.1726_U	Alveolates-Ciliates	Oligohymenophorea	Eukaryota; Alveolata; Ciliophora; Oligohymenophorea; Scuticociliatia; Scuticociliatia-1; Scuticociliatia-1_X; Scuticociliatia-1_X_sp.;	0.709366	0.709366	0.709366	1	1	18	0	0.008	0.681378	0.001317	0.681378	0.001317	0	0.722807	0.000472	0.722807	0.000472	0	0.059414	0.009796	1e-06	0.004606	1e-06	8	69
Alveolates-Ciliates_Alveolates-Dinoflagellates	KC488375.1.1634_U	Alveolates-Ciliates	Colpodea	Eukaryota; Alveolata; Ciliophora; Colpodea; Colpodea-1; Colpodea-1_X; Colpodea-1_XX; Colpodea-1_XX_sp.;	EU780629.1.1715_U	Alveolates-Dinoflagellates	Dinophyceae	Eukaryota; Alveolata; Dinophyta; Dinophyceae; Dinophyceae_X; Dinophyceae_XX; Dinophyceae_XXX; Dinophyceae_XXX_sp.;	0.65536	0.65536	0.65536	4	5	12	-1	0.018	0.042197	0.863814	0.610866	0.007081	-1	0.021053	0.931828	0.514964	0.028749	-1	0.094526	0.542428	2e-06	0.60529	5e-06	8	73
Alveolates-Ciliates_Alveolates-Ciliates	KC488375.1.1634_U	Alveolates-Ciliates	Colpodea	Eukaryota; Alveolata; Ciliophora; Colpodea; Colpodea-1; Colpodea-1_X; Colpodea-1_XX; Colpodea-1_XX_sp.;	AY665059.1.1720_U	Alveolates-Ciliates	Oligohymenophorea	Eukaryota; Alveolata; Ciliophora; Oligohymenophorea; Scuticociliatia; Scuticociliatia-1; Scuticociliatia-1_X; Scuticociliatia-1_X_sp.;	0.686016	0.686016	0.686016	3	3	16	0	0.009	0.630078	0.003834	0.630078	0.003834	0	0.685388	0.001201	0.685388	0.001201	0	0.063892	0.020007	2e-06	0.008679	1e-06	8	77
Alveolates-Ciliates_Alveolates-Dinoflagellates	KC488375.1.1634_U	Alveolates-Ciliates	Colpodea	Eukaryota; Alveolata; Ciliophora; Colpodea; Colpodea-1; Colpodea-1_X; Colpodea-1_XX; Colpodea-1_XX_sp.;	GU823932.1.1202_U	Alveolates-Dinoflagellates	Dinophyceae	Eukaryota; Alveolata; Dinophyta; Dinophyceae; Dinophyceae_X; Dinophyceae_XX; Dinophyceae_XXX; Dinophyceae_XXX_sp.;	0.610118	0.610118	0.610118	6	2	14	4	0.046	-0.018535	0.939966	0.713959	0.002793	4	-0.068824	0.779508	0.774606	0.000697	4	0.154843	0.562506	2e-06	0.558124	1e-06	8	81
Alveolates-Ciliates_Haptophytes	KC488375.1.1634_U	Alveolates-Ciliates	Colpodea	Eukaryota; Alveolata; Ciliophora; Colpodea; Colpodea-1; Colpodea-1_X; Colpodea-1_XX; Colpodea-1_XX_sp.;	JX680347	Haptophytes	Haptophyta_Clade_HAP3	Eukaryota; Hacrobia; Haptophyta; Haptophyta_Clade_HAP3; Haptophyta_Clade_HAP3_X; Haptophyta_Clade_HAP3_XX; Haptophyta_Clade_HAP3_XXX; Haptophyta_Clade_HAP3_XXX_sp.;	-0.73731	-0.73731	-0.73731	2	1	14	1	0.003	-0.403362	0.086806	-0.585395	0.0107	1	-0.359087	0.131083	-0.643595	0.003952	1	0.033974	0.148664	3e-06	0.204168	2e-06	8	94
Alveolates-Ciliates_Alveolates-Dinoflagellates	KC488375.1.1634_U	Alveolates-Ciliates	Colpodea	Eukaryota; Alveolata; Ciliophora; Colpodea; Colpodea-1; Colpodea-1_X; Colpodea-1_XX; Colpodea-1_XX_sp.;	EU793087.1.924_U	Alveolates-Dinoflagellates	Dinophyceae	Eukaryota; Alveolata; Dinophyta; Dinophyceae; Dinophyceae_X; Dinophyceae_XX; Dinophyceae_XXX; Dinophyceae_XXX_sp.;	-0.628128	-0.628128	-0.628128	2	2	17	0	0.033	-0.503982	0.027795	-0.503982	0.027795	0	-0.645614	0.00283	-0.645614	0.00283	0	0.131118	0.072691	4e-06	0.01551	1e-06	8	97
Alveolates-Ciliates_Stramenopiles-Other	KC488375.1.1634_U	Alveolates-Ciliates	Colpodea	Eukaryota; Alveolata; Ciliophora; Colpodea; Colpodea-1; Colpodea-1_X; Colpodea-1_XX; Colpodea-1_XX_sp.;	EU500152.1.842_U	Stramenopiles-Other	Rhizochromulinales	Eukaryota; Stramenopiles; Ochrophyta; Dictyochophyceae; Dictyochophyceae_X; Rhizochromulinales; Rhizochromulinales_X; Rhizochromulinales_X_sp.;	-0.636508	-0.636508	-0.636508	1	1	15	0	0.026	-0.62968	0.003863	-0.62968	0.003863	0	-0.584211	0.008625	0.617647	0.010788	3	0.116273	0.020114	2e-06	0.033368	3e-06	8	102
Alveolates-Ciliates_Stramenopiles-MAST	KC488375.1.1634_U	Alveolates-Ciliates	Colpodea	Eukaryota; Alveolata; Ciliophora; Colpodea; Colpodea-1; Colpodea-1_X; Colpodea-1_XX; Colpodea-1_XX_sp.;	EU499985.1.853_U	Stramenopiles-MAST	MAST-7	Eukaryota; Stramenopiles; Stramenopiles_X; MAST; MAST-7; MAST-7B; MAST-7B_X; MAST-7B_X_sp.;	-0.660238	-0.660238	-0.660238	2	1	14	1	0.019	-0.318348	0.184075	-0.640794	0.004165	1	-0.340351	0.153919	-0.630547	0.005025	1	0.097312	0.235326	2e-06	0.225828	2e-06	8	110
Alveolates-Ciliates_Alveolates-Dinoflagellates	KC488375.1.1634_U	Alveolates-Ciliates	Colpodea	Eukaryota; Alveolata; Ciliophora; Colpodea; Colpodea-1; Colpodea-1_X; Colpodea-1_XX; Colpodea-1_XX_sp.;	KJ759269.1.1802_U	Alveolates-Dinoflagellates	Dinophyceae	Eukaryota; Alveolata; Dinophyta; Dinophyceae; Dinophyceae_X; Dinophyceae_XX; Dinophyceae_XXX; Dinophyceae_XXX_sp.;	-0.643417	-0.643417	-0.643417	2	1	13	1	0.033	-0.110304	0.653043	-0.546144	0.019035	1	-0.179105	0.463155	-0.602273	0.00817	1	0.131118	0.474035	4e-06	0.42932	3e-06	8	116
Alveolates-Ciliates_Stramenopiles-MAST	KC488375.1.1634_U	Alveolates-Ciliates	Colpodea	Eukaryota; Alveolata; Ciliophora; Colpodea; Colpodea-1; Colpodea-1_X; Colpodea-1_XX; Colpodea-1_XX_sp.;	KC582992.1.1792_U	Stramenopiles-MAST	MAST-3	Eukaryota; Stramenopiles; Stramenopiles_X; MAST; MAST-3; MAST-3L; MAST-3L_X; MAST-3L_X_sp.;	0.770415	0.770415	0.770415	3	3	16	0	0.001	0.691862	0.001031	0.691862	0.001031	0	0.779289	8.4e-05	0.779289	8.4e-05	0	0.017494	0.008236	1e-06	0.001511	0	8	119
Alveolates-Ciliates_Stramenopiles-Other	KC488375.1.1634_U	Alveolates-Ciliates	Colpodea	Eukaryota; Alveolata; Ciliophora; Colpodea; Colpodea-1; Colpodea-1_X; Colpodea-1_XX; Colpodea-1_XX_sp.;	EU500153.1.840_U	Stramenopiles-Other	Rhizochromulinales	Eukaryota; Stramenopiles; Ochrophyta; Dictyochophyceae; Dictyochophyceae_X; Rhizochromulinales; Rhizochromulinales_X; Rhizochromulinales_X_sp.;	0.640851	0.640851	0.640851	4	1	14	3	0.024	-0.256266	0.289591	0.663097	0.005112	3	-0.168209	0.491226	0.660272	0.005373	3	0.111069	0.307424	2e-06	0.442547	2e-06	8	123
Alveolates-Ciliates_Haptophytes	KC488375.1.1634_U	Alveolates-Ciliates	Colpodea	Eukaryota; Alveolata; Ciliophora; Colpodea; Colpodea-1; Colpodea-1_X; Colpodea-1_XX; Colpodea-1_XX_sp.;	HG970975	Haptophytes	Haptophyta	Eukaryota; Hacrobia; Haptophyta; Haptophyta_X; Haptophyta_XX; Haptophyta_XXX; Haptophyta_XXXX; Haptophyta_XXXX_sp.;	-0.692582	-0.692582	-0.692582	3	3	16	0	0.011	-0.557724	0.013094	-0.595687	0.009093	1	-0.623958	0.004303	-0.626971	0.029113	7	0.071521	0.043949	3e-06	0.020507	5e-06	8	126
Alveolates-Ciliates_Stramenopiles-MAST	KC488375.1.1634_U	Alveolates-Ciliates	Colpodea	Eukaryota; Alveolata; Ciliophora; Colpodea; Colpodea-1; Colpodea-1_X; Colpodea-1_XX; Colpodea-1_XX_sp.;	AJ402350.1.1758_U	Stramenopiles-MAST	MAST-1	Eukaryota; Stramenopiles; Stramenopiles_X; MAST; MAST-1; MAST-1D; MAST-1D_X; MAST-1D_X_sp.;	-0.630833	-0.630833	-0.630833	3	3	16	0	0.035	-0.56005	0.012639	-0.56005	0.012639	0	-0.592365	0.007531	-0.592365	0.007531	0	0.135676	0.04292	3e-06	0.030375	2e-06	8	150
Alveolates-Ciliates_Alveolates-Syndiniales	KC488375.1.1634_U	Alveolates-Ciliates	Colpodea	Eukaryota; Alveolata; Ciliophora; Colpodea; Colpodea-1; Colpodea-1_X; Colpodea-1_XX; Colpodea-1_XX_sp.;	EU500154.1.816_U	Alveolates-Syndiniales	Dino-Group-III	Eukaryota; Alveolata; Dinophyta; Syndiniales; Dino-Group-III; Dino-Group-III_X; Dino-Group-III_XX; Dino-Group-III_XX_sp.;	0.629354	0.629354	0.629354	2	2	18	0	0.041	0.528606	0.019975	0.528606	0.019975	0	0.656428	0.002269	0.656428	0.002269	0	0.146981	0.058057	4e-06	0.013465	1e-06	8	151
Alveolates-Dinoflagellates_Stramenopiles-Other	EF527080.1.1343_U	Alveolates-Dinoflagellates	Dinophyceae	Eukaryota; Alveolata; Dinophyta; Dinophyceae; Dinophyceae_X; Dinophyceae_XX; Dinophyceae_XXX; Dinophyceae_XXX_sp.;	EU500162.1.816_U	Stramenopiles-Other	Florenciellales	Eukaryota; Stramenopiles; Ochrophyta; Dictyochophyceae; Dictyochophyceae_X; Florenciellales; Florenciellales_X; Florenciellales_X_sp.;	0.661453	0.661453	0.661453	3	3	17	0	0.032	0.633398	0.003598	0.686779	0.013623	7	0.670237	0.001689	0.748807	0.005073	7	0.129095	0.019057	3e-06	0.010933	2e-06	9	15
Alveolates-Dinoflagellates_Alveolates-Dinoflagellates	EF527080.1.1343_U	Alveolates-Dinoflagellates	Dinophyceae	Eukaryota; Alveolata; Dinophyta; Dinophyceae; Dinophyceae_X; Dinophyceae_XX; Dinophyceae_XXX; Dinophyceae_XXX_sp.;	EU371356.1.1766_U	Alveolates-Dinoflagellates	Chytriodinium	Eukaryota; Alveolata; Dinophyta; Dinophyceae; Dinophyceae_X; Dinophyceae_XX; Chytriodinium; Chytriodinium_roseum;	0.677364	0.677364	0.677364	2	2	17	0	0.02	0.714327	0.000591	0.714327	0.000591	0	0.669592	0.001713	0.669592	0.001713	0	0.100183	0.005645	1e-06	0.011013	1e-06	9	21
Alveolates-Dinoflagellates_Alveolates-Dinoflagellates	EF527080.1.1343_U	Alveolates-Dinoflagellates	Dinophyceae	Eukaryota; Alveolata; Dinophyta; Dinophyceae; Dinophyceae_X; Dinophyceae_XX; Dinophyceae_XXX; Dinophyceae_XXX_sp.;	EU087269.1.895_U	Alveolates-Dinoflagellates	Pfiesteriaceae	Eukaryota; Alveolata; Dinophyta; Dinophyceae; Dinophyceae_X; Pfiesteriaceae; Pfiesteriaceae_X; Pfiesteriaceae_X_sp.;	0.774715	0.774715	0.774715	1	1	19	0	0.001	0.794648	4.8e-05	0.794648	4.8e-05	0	0.814035	2.2e-05	0.814035	2.2e-05	0	0.017494	0.001065	0	0.000635	0	9	22
Alveolates-Dinoflagellates_Alveolates-Ciliates	EF527080.1.1343_U	Alveolates-Dinoflagellates	Dinophyceae	Eukaryota; Alveolata; Dinophyta; Dinophyceae; Dinophyceae_X; Dinophyceae_XX; Dinophyceae_XXX; Dinophyceae_XXX_sp.;	GU819492.1.1175_U	Alveolates-Ciliates	Spirotrichea	Eukaryota; Alveolata; Ciliophora; Spirotrichea; Strombidiida; Strombidiidae_J; Strombidiidae_J_X; Strombidiidae_J_X_sp.;	-0.715956	-0.715956	-0.715956	3	3	14	0	0.006	-0.729782	0.00039	-0.729782	0.00039	0	-0.703818	0.000771	-0.703818	0.000771	0	0.050667	0.004364	1e-06	0.006471	1e-06	9	25
Alveolates-Dinoflagellates_Alveolates-Syndiniales	EF527080.1.1343_U	Alveolates-Dinoflagellates	Dinophyceae	Eukaryota; Alveolata; Dinophyta; Dinophyceae; Dinophyceae_X; Dinophyceae_XX; Dinophyceae_XXX; Dinophyceae_XXX_sp.;	FJ431723.1.830_U	Alveolates-Syndiniales	Dino-Group-III	Eukaryota; Alveolata; Dinophyta; Syndiniales; Dino-Group-III; Dino-Group-III_X; Dino-Group-III_XX; Dino-Group-III_XX_sp.;	0.854231	0.854231	0.854231	3	3	16	0	0	0.853801	3e-06	0.853801	3e-06	0	0.853883	3e-06	0.853883	3e-06	0	0	0.000176	0	0.000197	0	9	27
Alveolates-Dinoflagellates_Alveolates-Dinoflagellates	EF527080.1.1343_U	Alveolates-Dinoflagellates	Dinophyceae	Eukaryota; Alveolata; Dinophyta; Dinophyceae; Dinophyceae_X; Dinophyceae_XX; Dinophyceae_XXX; Dinophyceae_XXX_sp.;	GU825315.1.1202_U	Alveolates-Dinoflagellates	Dinophyceae	Eukaryota; Alveolata; Dinophyta; Dinophyceae; Dinophyceae_X; Dinophyceae_XX; Dinophyceae_XXX; Dinophyceae_XXX_sp.;	0.862495	0.862495	0.862495	2	2	17	0	0	0.888388	0	0.888388	0	0	0.891228	0	0.891228	0	0	0	5.2e-05	0	5.4e-05	0	9	32
Alveolates-Dinoflagellates_Stramenopiles-MAST	EF527080.1.1343_U	Alveolates-Dinoflagellates	Dinophyceae	Eukaryota; Alveolata; Dinophyta; Dinophyceae; Dinophyceae_X; Dinophyceae_XX; Dinophyceae_XXX; Dinophyceae_XXX_sp.;	KF129967.1.1739_U	Stramenopiles-MAST	MAST-9	Eukaryota; Stramenopiles; Stramenopiles_X; MAST; MAST-9; MAST-9A; MAST-9A_X; MAST-9A_X_sp.;	-0.750743	-0.750743	-0.750743	1	1	19	0	0.003	-0.755094	0.000186	-0.755094	0.000186	0	-0.773146	0.000104	-0.773146	0.000104	0	0.033974	0.002622	0	0.001727	0	9	38
Alveolates-Dinoflagellates_Stramenopiles-MAST	EF527080.1.1343_U	Alveolates-Dinoflagellates	Dinophyceae	Eukaryota; Alveolata; Dinophyta; Dinophyceae; Dinophyceae_X; Dinophyceae_XX; Dinophyceae_XXX; Dinophyceae_XXX_sp.;	HM163291.1.1682_U	Stramenopiles-MAST	MAST-3	Eukaryota; Stramenopiles; Stramenopiles_X; MAST; MAST-3; MAST-3I; MAST-3I_X; MAST-3I_X_sp.;	0.729538	0.729538	0.729538	3	1	17	2	0.006	-0.572121	0.010479	0.75209	0.000497	2	-0.575439	0.009941	0.757353	0.00043	2	0.050667	0.038369	1e-06	0.036927	1e-06	9	39
Alveolates-Dinoflagellates_Alveolates-Dinoflagellates	EF527080.1.1343_U	Alveolates-Dinoflagellates	Dinophyceae	Eukaryota; Alveolata; Dinophyta; Dinophyceae; Dinophyceae_X; Dinophyceae_XX; Dinophyceae_XXX; Dinophyceae_XXX_sp.;	KF129831.1.1758_U	Alveolates-Dinoflagellates	Dinophyceae	Eukaryota; Alveolata; Dinophyta; Dinophyceae; Dinophyceae_X; Dinophyceae_XX; Dinophyceae_XXX; Dinophyceae_XXX_sp.;	0.866302	0.866302	0.866302	2	2	17	0	0	0.782975	7.4e-05	0.782975	7.4e-05	0	0.843306	6e-06	0.843306	6e-06	0	0	0.001408	0	0.00027	0	9	40
Alveolates-Dinoflagellates_Alveolates-Dinoflagellates	EF527080.1.1343_U	Alveolates-Dinoflagellates	Dinophyceae	Eukaryota; Alveolata; Dinophyta; Dinophyceae; Dinophyceae_X; Dinophyceae_XX; Dinophyceae_XXX; Dinophyceae_XXX_sp.;	FJ217814.1.1521_U	Alveolates-Dinoflagellates	Azadinium	Eukaryota; Alveolata; Dinophyta; Dinophyceae; Dinophyceae_X; Dinophyceae_XX; Azadinium; Azadinium_spinosum;	0.801906	0.801906	0.801906	2	2	18	0	0	0.788499	6.1e-05	0.788499	6.1e-05	0	0.829311	1.1e-05	0.829311	1.1e-05	0	0	0.001225	0	0.000425	0	9	43
Alveolates-Dinoflagellates_Stramenopiles-Pelagophytes	EF527080.1.1343_U	Alveolates-Dinoflagellates	Dinophyceae	Eukaryota; Alveolata; Dinophyta; Dinophyceae; Dinophyceae_X; Dinophyceae_XX; Dinophyceae_XXX; Dinophyceae_XXX_sp.;	GU196150.1.1374_U	Stramenopiles-Pelagophytes	Pelagomonadaceae_clade_A	Eukaryota; Stramenopiles; Ochrophyta; Pelagophyceae; Pelagomonadales; Pelagomonadaceae; Pelagomonadaceae_clade_A; Pelagomonadaceae_clade_A_sp.;	0.672365	0.672365	0.672365	3	3	17	0	0.018	0.716276	0.000561	0.716276	0.000561	0	0.705263	0.000744	0.705263	0.000744	0	0.094526	0.005483	1e-06	0.006298	1e-06	9	52
Alveolates-Dinoflagellates_Alveolates-Dinoflagellates	EF527080.1.1343_U	Alveolates-Dinoflagellates	Dinophyceae	Eukaryota; Alveolata; Dinophyta; Dinophyceae; Dinophyceae_X; Dinophyceae_XX; Dinophyceae_XXX; Dinophyceae_XXX_sp.;	HM581705.1.1793_U	Alveolates-Dinoflagellates	Dinophyceae	Eukaryota; Alveolata; Dinophyta; Dinophyceae; Dinophyceae_X; Dinophyceae_XX; Dinophyceae_XXX; Dinophyceae_XXX_sp.;	0.810975	0.810975	0.810975	3	3	16	0	0	0.764522	0.000138	0.764522	0.000138	0	0.832821	1e-05	0.832821	1e-05	0	0	0.002156	0	0.000387	0	9	55
Alveolates-Dinoflagellates_Stramenopiles-Other	EF527080.1.1343_U	Alveolates-Dinoflagellates	Dinophyceae	Eukaryota; Alveolata; Dinophyta; Dinophyceae; Dinophyceae_X; Dinophyceae_XX; Dinophyceae_XXX; Dinophyceae_XXX_sp.;	EF695122.1.814_U	Stramenopiles-Other	MOCH-2	Eukaryota; Stramenopiles; Stramenopiles_X; MOCH; MOCH-2; MOCH-2_X; MOCH-2_XX; MOCH-2_XX_sp.;	-0.651227	-0.651227	-0.651227	1	1	19	0	0.03	-0.703625	0.000775	-0.703625	0.000775	0	-0.645587	0.002832	-0.645587	0.002832	0	0.125466	0.006786	1e-06	0.01551	1e-06	9	60
Alveolates-Dinoflagellates_Stramenopiles-MAST	EF527080.1.1343_U	Alveolates-Dinoflagellates	Dinophyceae	Eukaryota; Alveolata; Dinophyta; Dinophyceae; Dinophyceae_X; Dinophyceae_XX; Dinophyceae_XXX; Dinophyceae_XXX_sp.;	GU823216.1.1365_U	Stramenopiles-MAST	MAST-3	Eukaryota; Stramenopiles; Stramenopiles_X; MAST; MAST-3; MAST-3I; MAST-3I_X; MAST-3I_X_sp.;	-0.784338	-0.784338	-0.784338	2	2	18	0	0	-0.798167	4.2e-05	-0.798167	4.2e-05	0	-0.775439	9.6e-05	-0.775439	9.6e-05	0	0	0.000966	0	0.00166	0	9	61
Alveolates-Dinoflagellates_Alveolates-Dinoflagellates	EF527080.1.1343_U	Alveolates-Dinoflagellates	Dinophyceae	Eukaryota; Alveolata; Dinophyta; Dinophyceae; Dinophyceae_X; Dinophyceae_XX; Dinophyceae_XXX; Dinophyceae_XXX_sp.;	HE611580.1.1746_U	Alveolates-Dinoflagellates	Gyrodinium	Eukaryota; Alveolata; Dinophyta; Dinophyceae; Dinophyceae_X; Dinophyceae_XX; Gyrodinium; Gyrodinium_sp.;	0.853177	0.853177	0.853177	1	1	19	0	0	0.857033	3e-06	0.857033	3e-06	0	0.881966	1e-06	0.881966	1e-06	0	0	0.000161	0	8.1e-05	0	9	65
Alveolates-Dinoflagellates_Alveolates-Dinoflagellates	EF527080.1.1343_U	Alveolates-Dinoflagellates	Dinophyceae	Eukaryota; Alveolata; Dinophyta; Dinophyceae; Dinophyceae_X; Dinophyceae_XX; Dinophyceae_XXX; Dinophyceae_XXX_sp.;	HM581766.1.1782_U	Alveolates-Dinoflagellates	Prorocentrum	Eukaryota; Alveolata; Dinophyta; Dinophyceae; Dinophyceae_X; Dinophyceae_XX; Prorocentrum; Prorocentrum_sp.;	0.731506	0.731506	0.731506	3	3	17	0	0.006	0.688243	0.001123	0.688243	0.001123	0	0.764912	0.000136	0.764912	0.000136	0	0.050667	0.008716	1e-06	0.002062	0	9	66
Alveolates-Dinoflagellates_Alveolates-Dinoflagellates	EF527080.1.1343_U	Alveolates-Dinoflagellates	Dinophyceae	Eukaryota; Alveolata; Dinophyta; Dinophyceae; Dinophyceae_X; Dinophyceae_XX; Dinophyceae_XXX; Dinophyceae_XXX_sp.;	EU500118.1.810_U	Alveolates-Dinoflagellates	Gymnodinium	Eukaryota; Alveolata; Dinophyta; Dinophyceae; Dinophyceae_X; Dinophyceae_XX; Gymnodinium; Gymnodinium_sp.;	0.738628	0.738628	0.738628	3	3	17	0	0.002	0.732934	0.000357	0.732934	0.000357	0	0.758227	0.000169	0.758227	0.000169	0	0.026563	0.004135	0	0.002374	0	9	67
Alveolates-Dinoflagellates_Alveolates-Ciliates	EF527080.1.1343_U	Alveolates-Dinoflagellates	Dinophyceae	Eukaryota; Alveolata; Dinophyta; Dinophyceae; Dinophyceae_X; Dinophyceae_XX; Dinophyceae_XXX; Dinophyceae_XXX_sp.;	AY665059.1.1720_U	Alveolates-Ciliates	Oligohymenophorea	Eukaryota; Alveolata; Ciliophora; Oligohymenophorea; Scuticociliatia; Scuticociliatia-1; Scuticociliatia-1_X; Scuticociliatia-1_X_sp.;	-0.633304	-0.633304	-0.633304	3	3	17	0	0.046	-0.655706	0.002303	-0.655706	0.002303	0	-0.674857	0.001525	-0.674857	0.001525	0	0.154843	0.014295	1e-06	0.010187	1e-06	9	77
Alveolates-Dinoflagellates_Rhizaria-Acantharia	EF527080.1.1343_U	Alveolates-Dinoflagellates	Dinophyceae	Eukaryota; Alveolata; Dinophyta; Dinophyceae; Dinophyceae_X; Dinophyceae_XX; Dinophyceae_XXX; Dinophyceae_XXX_sp.;	HM561210.1.973_U	Rhizaria-Acantharia	Acantharea	Eukaryota; Rhizaria; Radiolaria; Acantharea; Acantharea_X; Acantharea_XX; Acantharea_XXX; Acantharea_XXX_sp.;	-0.734755	-0.734755	-0.734755	1	1	19	0	0.004	-0.758221	0.000169	-0.758221	0.000169	0	-0.773146	0.000104	-0.773146	0.000104	0	0.040295	0.002451	0	0.001727	0	9	80
Alveolates-Dinoflagellates_Archaeplastids-Chlorophytes	EF527080.1.1343_U	Alveolates-Dinoflagellates	Dinophyceae	Eukaryota; Alveolata; Dinophyta; Dinophyceae; Dinophyceae_X; Dinophyceae_XX; Dinophyceae_XXX; Dinophyceae_XXX_sp.;	EU143529.1.906_U	Archaeplastids-Chlorophytes	Pyramimonadales	Eukaryota; Archaeplastida; Chlorophyta; Pyramimonadales; Pyramimonadales_X; Pyramimonadales_XX; Pterosperma; Pterosperma_sp.;	0.742202	0.742202	0.742202	3	3	17	0	0.004	0.663576	0.001951	0.710349	0.00963	7	0.782265	7.6e-05	0.782265	7.6e-05	0	0.040295	0.012813	3e-06	0.001399	0	9	84
Alveolates-Dinoflagellates_Alveolates-Ciliates	EF527080.1.1343_U	Alveolates-Dinoflagellates	Dinophyceae	Eukaryota; Alveolata; Dinophyta; Dinophyceae; Dinophyceae_X; Dinophyceae_XX; Dinophyceae_XXX; Dinophyceae_XXX_sp.;	KJ759492.1.1752_U	Alveolates-Ciliates	Phyllopharyngea	Eukaryota; Alveolata; Ciliophora; Phyllopharyngea; Cyrtophoria; Chlamydodontidae; Chlamydodon; Chlamydodon_sp.;	-0.660319	-0.660319	-0.660319	5	5	15	0	0.042	-0.52859	0.01998	0.592338	0.019982	4	-0.554386	0.013769	0.678571	0.005417	4	0.148696	0.058057	4e-06	0.046649	2e-06	9	93
Alveolates-Dinoflagellates_Alveolates-Dinoflagellates	EF527080.1.1343_U	Alveolates-Dinoflagellates	Dinophyceae	Eukaryota; Alveolata; Dinophyta; Dinophyceae; Dinophyceae_X; Dinophyceae_XX; Dinophyceae_XXX; Dinophyceae_XXX_sp.;	EU793087.1.924_U	Alveolates-Dinoflagellates	Dinophyceae	Eukaryota; Alveolata; Dinophyta; Dinophyceae; Dinophyceae_X; Dinophyceae_XX; Dinophyceae_XXX; Dinophyceae_XXX_sp.;	0.801836	0.801836	0.801836	1	1	19	0	0	0.849649	4e-06	0.849649	4e-06	0	0.810526	2.6e-05	0.810526	2.6e-05	0	0	0.000203	0	0.000696	0	9	97
Alveolates-Dinoflagellates_Alveolates-Syndiniales	EF527080.1.1343_U	Alveolates-Dinoflagellates	Dinophyceae	Eukaryota; Alveolata; Dinophyta; Dinophyceae; Dinophyceae_X; Dinophyceae_XX; Dinophyceae_XXX; Dinophyceae_XXX_sp.;	EF172977.1.1676_U	Alveolates-Syndiniales	Dino-Group-II	Eukaryota; Alveolata; Dinophyta; Syndiniales; Dino-Group-II; Dino-Group-II-Clade-7; Dino-Group-II-Clade-7_X; Dino-Group-II-Clade-7_X_sp.;	-0.642496	-0.642496	-0.642496	1	2	15	-1	0.04	-0.157068	0.520763	-0.610833	0.007085	-1	-0.170325	0.485711	-0.630166	0.00506	-1	0.145146	0.424853	2e-06	0.439679	2e-06	9	100
Alveolates-Dinoflagellates_Alveolates-Syndiniales	EF527080.1.1343_U	Alveolates-Dinoflagellates	Dinophyceae	Eukaryota; Alveolata; Dinophyta; Dinophyceae; Dinophyceae_X; Dinophyceae_XX; Dinophyceae_XXX; Dinophyceae_XXX_sp.;	EU780604.1.1660_U	Alveolates-Syndiniales	Dino-Group-III	Eukaryota; Alveolata; Dinophyta; Syndiniales; Dino-Group-III; Dino-Group-III_X; Dino-Group-III_XX; Dino-Group-III_XX_sp.;	0.644658	0.644658	0.644658	2	2	18	0	0.029	0.72212	0.000481	0.72212	0.000481	0	0.70294	0.000788	0.70294	0.000788	0	0.123397	0.004949	1e-06	0.006562	1e-06	9	103
Alveolates-Dinoflagellates_Alveolates-Ciliates	EF527080.1.1343_U	Alveolates-Dinoflagellates	Dinophyceae	Eukaryota; Alveolata; Dinophyta; Dinophyceae; Dinophyceae_X; Dinophyceae_XX; Dinophyceae_XXX; Dinophyceae_XXX_sp.;	HQ867071.1.870_U	Alveolates-Ciliates	Spirotrichea	Eukaryota; Alveolata; Ciliophora; Spirotrichea; Strombidiida_G; Strombidiida_G_X; Strombidiida_G_XX; Strombidiida_G_XX_sp.;	0.699581	0.699581	0.699581	3	3	17	0	0.01	0.710602	0.00065	0.710602	0.00065	0	0.726635	0.000426	0.726635	0.000426	0	0.067958	0.006036	1e-06	0.004292	1e-06	9	106
Alveolates-Dinoflagellates_Alveolates-Dinoflagellates	EF527080.1.1343_U	Alveolates-Dinoflagellates	Dinophyceae	Eukaryota; Alveolata; Dinophyta; Dinophyceae; Dinophyceae_X; Dinophyceae_XX; Dinophyceae_XXX; Dinophyceae_XXX_sp.;	AY664921.1.1754_U	Alveolates-Dinoflagellates	Prorocentrum	Eukaryota; Alveolata; Dinophyta; Dinophyceae; Dinophyceae_X; Dinophyceae_XX; Prorocentrum; Prorocentrum_sp.;	0.840882	0.840882	0.840882	3	3	17	0	0	0.745655	0.000248	0.745655	0.000248	0	0.837209	8e-06	0.837209	8e-06	0	0	0.003165	0	0.000338	0	9	111
Alveolates-Dinoflagellates_Alveolates-Ciliates	EF527080.1.1343_U	Alveolates-Dinoflagellates	Dinophyceae	Eukaryota; Alveolata; Dinophyta; Dinophyceae; Dinophyceae_X; Dinophyceae_XX; Dinophyceae_XXX; Dinophyceae_XXX_sp.;	DQ120009.1.1729_U	Alveolates-Ciliates	Litostomatea	Eukaryota; Alveolata; Ciliophora; Litostomatea; Cyclotrichia; Cyclotrichia_X; Cyclotrichia_XX; Cyclotrichia_XX_sp.;	-0.767144	-0.767144	-0.767144	3	3	17	0	0.001	-0.794861	4.8e-05	-0.794861	4.8e-05	0	-0.792982	5.1e-05	-0.792982	5.1e-05	0	0.017494	0.001062	0	0.001082	0	9	113
Alveolates-Dinoflagellates_Alveolates-Dinoflagellates	EF527080.1.1343_U	Alveolates-Dinoflagellates	Dinophyceae	Eukaryota; Alveolata; Dinophyta; Dinophyceae; Dinophyceae_X; Dinophyceae_XX; Dinophyceae_XXX; Dinophyceae_XXX_sp.;	KJ759269.1.1802_U	Alveolates-Dinoflagellates	Dinophyceae	Eukaryota; Alveolata; Dinophyta; Dinophyceae; Dinophyceae_X; Dinophyceae_XX; Dinophyceae_XXX; Dinophyceae_XXX_sp.;	0.646386	0.646386	0.646386	2	2	18	0	0.028	0.57039	0.010769	0.57039	0.010769	0	0.694469	0.000969	0.694469	0.000969	0	0.120985	0.039016	3e-06	0.007521	1e-06	9	116
Alveolates-Dinoflagellates_Alveolates-Dinoflagellates	EF527080.1.1343_U	Alveolates-Dinoflagellates	Dinophyceae	Eukaryota; Alveolata; Dinophyta; Dinophyceae; Dinophyceae_X; Dinophyceae_XX; Dinophyceae_XXX; Dinophyceae_XXX_sp.;	AY664894.1.1756_U	Alveolates-Dinoflagellates	Dinophyceae	Eukaryota; Alveolata; Dinophyta; Dinophyceae; Dinophyceae_X; Dinophyceae_XX; Dinophyceae_XXX; Dinophyceae_XXX_sp.;	0.72489	0.72489	0.72489	2	2	15	0	0.004	0.695732	0.00094	0.695732	0.00094	0	0.740351	0.000289	0.740351	0.000289	0	0.040295	0.007702	1e-06	0.003356	0	9	117
Alveolates-Dinoflagellates_Alveolates-Dinoflagellates	EF527080.1.1343_U	Alveolates-Dinoflagellates	Dinophyceae	Eukaryota; Alveolata; Dinophyta; Dinophyceae; Dinophyceae_X; Dinophyceae_XX; Dinophyceae_XXX; Dinophyceae_XXX_sp.;	FN690221.1.1692_U	Alveolates-Dinoflagellates	Dinophyceae	Eukaryota; Alveolata; Dinophyta; Dinophyceae; Dinophyceae_X; Dinophyceae_XX; Dinophyceae_XXX; Dinophyceae_XXX_sp.;	0.768489	0.768489	0.768489	3	3	17	0	0.002	0.628266	0.003968	0.628266	0.003968	0	0.778947	8.5e-05	0.778947	8.5e-05	0	0.026563	0.020413	2e-06	0.001515	0	9	118
Alveolates-Dinoflagellates_Alveolates-Ciliates	EF527080.1.1343_U	Alveolates-Dinoflagellates	Dinophyceae	Eukaryota; Alveolata; Dinophyta; Dinophyceae; Dinophyceae_X; Dinophyceae_XX; Dinophyceae_XXX; Dinophyceae_XXX_sp.;	KJ759417.1.1743_U	Alveolates-Ciliates	Spirotrichea	Eukaryota; Alveolata; Ciliophora; Spirotrichea; Choreotrichida; Leegaardiellidae_B; Leegaardiella; Leegaardiella_sp.;	-0.671744	-0.671744	-0.671744	6	1	12	5	0.017	-0.049252	0.8413	-0.764901	0.001437	5	-0.006154	0.980053	-0.775824	0.001108	5	0.091523	0.53658	1e-06	0.617579	1e-06	9	124
Alveolates-Dinoflagellates_Haptophytes	EF527080.1.1343_U	Alveolates-Dinoflagellates	Dinophyceae	Eukaryota; Alveolata; Dinophyta; Dinophyceae; Dinophyceae_X; Dinophyceae_XX; Dinophyceae_XXX; Dinophyceae_XXX_sp.;	HG970975	Haptophytes	Haptophyta	Eukaryota; Hacrobia; Haptophyta; Haptophyta_X; Haptophyta_XX; Haptophyta_XXX; Haptophyta_XXXX; Haptophyta_XXXX_sp.;	-0.661284	-0.661284	-0.661284	5	3	13	2	0.019	0.598184	0.006822	-0.619419	0.008008	2	0.638877	0.003235	0.764788	0.002324	6	0.097312	0.02899	3e-06	0.017021	1e-06	9	126
Alveolates-Dinoflagellates_Alveolates-Ciliates	EF527080.1.1343_U	Alveolates-Dinoflagellates	Dinophyceae	Eukaryota; Alveolata; Dinophyta; Dinophyceae; Dinophyceae_X; Dinophyceae_XX; Dinophyceae_XXX; Dinophyceae_XXX_sp.;	FJ422993.1.1778_U	Alveolates-Ciliates	Spirotrichea	Eukaryota; Alveolata; Ciliophora; Spirotrichea; Strombidiida; Tontoniidae_B; Pseudotontonia; Pseudotontonia_simplicidens;	0.681805	0.681805	0.681805	2	2	17	0	0.013	0.653015	0.002435	0.653015	0.002435	0	0.654386	0.002367	0.654386	0.002367	0	0.078309	0.014765	1e-06	0.013858	1e-06	9	129
Alveolates-Dinoflagellates_Alveolates-Syndiniales	EF527080.1.1343_U	Alveolates-Dinoflagellates	Dinophyceae	Eukaryota; Alveolata; Dinophyta; Dinophyceae; Dinophyceae_X; Dinophyceae_XX; Dinophyceae_XXX; Dinophyceae_XXX_sp.;	HQ870498.1.849_U	Alveolates-Syndiniales	Dino-Group-III	Eukaryota; Alveolata; Dinophyta; Syndiniales; Dino-Group-III; Dino-Group-III_X; Dino-Group-III_XX; Dino-Group-III_XX_sp.;	0.775152	0.775152	0.775152	1	1	18	0	0.001	0.792585	5.2e-05	0.792585	5.2e-05	0	0.820739	1.7e-05	0.820739	1.7e-05	0	0.017494	0.001117	0	0.000547	0	9	132
Alveolates-Dinoflagellates_Stramenopiles-Chrysophytes	EF527080.1.1343_U	Alveolates-Dinoflagellates	Dinophyceae	Eukaryota; Alveolata; Dinophyta; Dinophyceae; Dinophyceae_X; Dinophyceae_XX; Dinophyceae_XXX; Dinophyceae_XXX_sp.;	KC582997.1.1775_U	Stramenopiles-Chrysophytes	Chrysophyceae_Clade-I	Eukaryota; Stramenopiles; Ochrophyta; Chrysophyceae; Chrysophyceae_X; Chrysophyceae_Clade-I; Chrysophyceae_Clade-I_X; Chrysophyceae_Clade-I_X_sp.;	-0.645681	-0.645681	-0.645681	3	3	17	0	0.033	-0.69911	0.000866	-0.69911	0.000866	0	-0.706193	0.000727	-0.706193	0.000727	0	0.131118	0.007284	1e-06	0.006205	1e-06	9	142
Alveolates-Dinoflagellates_Stramenopiles-Diatoms	EF527080.1.1343_U	Alveolates-Dinoflagellates	Dinophyceae	Eukaryota; Alveolata; Dinophyta; Dinophyceae; Dinophyceae_X; Dinophyceae_XX; Dinophyceae_XXX; Dinophyceae_XXX_sp.;	EU499988.1.803_U	Stramenopiles-Diatoms	Raphid-pennate	Eukaryota; Stramenopiles; Ochrophyta; Bacillariophyta; Bacillariophyta_X; Raphid-pennate; Raphid-pennate_X; Raphid-pennate_X_sp.;	-0.832367	-0.832367	-0.832367	1	1	19	0	0	-0.797196	4.4e-05	-0.797196	4.4e-05	0	-0.857895	3e-06	-0.857895	3e-06	0	0	0.000992	0	0.000177	0	9	145
Alveolates-Dinoflagellates_Stramenopiles-MAST	EF527080.1.1343_U	Alveolates-Dinoflagellates	Dinophyceae	Eukaryota; Alveolata; Dinophyta; Dinophyceae; Dinophyceae_X; Dinophyceae_XX; Dinophyceae_XXX; Dinophyceae_XXX_sp.;	AJ402350.1.1758_U	Stramenopiles-MAST	MAST-1	Eukaryota; Stramenopiles; Stramenopiles_X; MAST; MAST-1; MAST-1D; MAST-1D_X; MAST-1D_X_sp.;	0.741658	0.741658	0.741658	3	3	17	0	0.002	0.772976	0.000104	0.772976	0.000104	0	0.781922	7.7e-05	0.781922	7.7e-05	0	0.026563	0.00177	0	0.001412	0	9	150
Alveolates-Ciliates_Stramenopiles-MAST	KJ763611.1.1765_U	Alveolates-Ciliates	Oligohymenophorea	Eukaryota; Alveolata; Ciliophora; Oligohymenophorea; Scuticociliatia; Scuticociliatia-1; Scuticociliatia-1_X; Scuticociliatia-1_X_sp.;	JQ782080.1.1737_U	Stramenopiles-MAST	MAST-3	Eukaryota; Stramenopiles; Stramenopiles_X; MAST; MAST-3; MAST-3I; MAST-3I_X; MAST-3I_X_sp.;	-0.677043	-0.677043	-0.677043	1	1	19	0	0.013	-0.703584	0.000776	-0.703584	0.000776	0	-0.730607	0.000381	-0.730607	0.000381	0	0.078309	0.006786	1e-06	0.004017	0	10	13
Alveolates-Ciliates_Stramenopiles-Other	KJ763611.1.1765_U	Alveolates-Ciliates	Oligohymenophorea	Eukaryota; Alveolata; Ciliophora; Oligohymenophorea; Scuticociliatia; Scuticociliatia-1; Scuticociliatia-1_X; Scuticociliatia-1_X_sp.;	EU500162.1.816_U	Stramenopiles-Other	Florenciellales	Eukaryota; Stramenopiles; Ochrophyta; Dictyochophyceae; Dictyochophyceae_X; Florenciellales; Florenciellales_X; Florenciellales_X_sp.;	-0.796487	-0.796487	-0.796487	1	1	19	0	0	-0.805013	3.2e-05	-0.805013	3.2e-05	0	-0.805169	3.2e-05	-0.805169	3.2e-05	0	0	0.000781	0	0.000817	0	10	15
Alveolates-Ciliates_Stramenopiles-Chrysophytes	KJ763611.1.1765_U	Alveolates-Ciliates	Oligohymenophorea	Eukaryota; Alveolata; Ciliophora; Oligohymenophorea; Scuticociliatia; Scuticociliatia-1; Scuticociliatia-1_X; Scuticociliatia-1_X_sp.;	KC583138.1.1098_U	Stramenopiles-Chrysophytes	Chrysophyceae_Clade-H	Eukaryota; Stramenopiles; Ochrophyta; Chrysophyceae; Chrysophyceae_X; Chrysophyceae_Clade-H; Chrysophyceae_Clade-H_X; Chrysophyceae_Clade-H_X_sp.;	0.62949	0.62949	0.62949	2	2	17	0	0.031	0.572457	0.010423	0.572457	0.010423	0	0.600791	0.006523	0.600791	0.006523	0	0.127199	0.03822	3e-06	0.027433	2e-06	10	20
Alveolates-Ciliates_Alveolates-Ciliates	KJ763611.1.1765_U	Alveolates-Ciliates	Oligohymenophorea	Eukaryota; Alveolata; Ciliophora; Oligohymenophorea; Scuticociliatia; Scuticociliatia-1; Scuticociliatia-1_X; Scuticociliatia-1_X_sp.;	KJ759341.1.1721_U	Alveolates-Ciliates	Phyllopharyngea	Eukaryota; Alveolata; Ciliophora; Phyllopharyngea; Cyrtophoria; Chlamydodontidae; Chlamydodon; Chlamydodon_sp.;	0.626197	0.626197	0.626197	1	1	19	0	0.033	0.687378	0.001146	0.687378	0.001146	0	0.669886	0.001702	0.669886	0.001702	0	0.131118	0.008852	1e-06	0.010978	1e-06	10	24
Alveolates-Ciliates_Alveolates-Ciliates	KJ763611.1.1765_U	Alveolates-Ciliates	Oligohymenophorea	Eukaryota; Alveolata; Ciliophora; Oligohymenophorea; Scuticociliatia; Scuticociliatia-1; Scuticociliatia-1_X; Scuticociliatia-1_X_sp.;	GU819492.1.1175_U	Alveolates-Ciliates	Spirotrichea	Eukaryota; Alveolata; Ciliophora; Spirotrichea; Strombidiida; Strombidiidae_J; Strombidiidae_J_X; Strombidiidae_J_X_sp.;	0.674689	0.674689	0.674689	1	1	19	0	0.016	0.81202	2.4e-05	0.81202	2.4e-05	0	0.736611	0.000322	0.736611	0.000322	0	0.088365	0.000639	0	0.003586	0	10	25
Alveolates-Ciliates_Alveolates-Ciliates	KJ763611.1.1765_U	Alveolates-Ciliates	Oligohymenophorea	Eukaryota; Alveolata; Ciliophora; Oligohymenophorea; Scuticociliatia; Scuticociliatia-1; Scuticociliatia-1_X; Scuticociliatia-1_X_sp.;	KY290313.1.1621_U	Alveolates-Ciliates	Spirotrichea	Eukaryota; Alveolata; Ciliophora; Spirotrichea; Choreotrichida; Leegaardiellidae_B; Leegaardiella; Leegaardiella_sp.;	0.655585	0.655585	0.655585	3	3	16	0	0.024	0.575137	0.009989	0.575137	0.009989	0	0.478911	0.038034	0.478911	0.038034	0	0.111069	0.037326	3e-06	0.092247	6e-06	10	36
Alveolates-Ciliates_Stramenopiles-MAST	KJ763611.1.1765_U	Alveolates-Ciliates	Oligohymenophorea	Eukaryota; Alveolata; Ciliophora; Oligohymenophorea; Scuticociliatia; Scuticociliatia-1; Scuticociliatia-1_X; Scuticociliatia-1_X_sp.;	JQ782004.1.1784_U	Stramenopiles-MAST	MAST-1	Eukaryota; Stramenopiles; Stramenopiles_X; MAST; MAST-1; MAST-1C; MAST-1C_X; MAST-1C_X_sp.;	-0.781278	-0.781278	-0.781278	1	1	19	0	0	-0.784862	6.9e-05	-0.784862	6.9e-05	0	-0.84585	5e-06	-0.84585	5e-06	0	0	0.001342	0	0.000253	0	10	37
Alveolates-Ciliates_Stramenopiles-MAST	KJ763611.1.1765_U	Alveolates-Ciliates	Oligohymenophorea	Eukaryota; Alveolata; Ciliophora; Oligohymenophorea; Scuticociliatia; Scuticociliatia-1; Scuticociliatia-1_X; Scuticociliatia-1_X_sp.;	KF129967.1.1739_U	Stramenopiles-MAST	MAST-9	Eukaryota; Stramenopiles; Stramenopiles_X; MAST; MAST-9; MAST-9A; MAST-9A_X; MAST-9A_X_sp.;	0.753605	0.753605	0.753605	1	1	19	0	0.002	0.857568	3e-06	0.857568	3e-06	0	0.781387	7.8e-05	0.781387	7.8e-05	0	0.026563	0.000157	0	0.001431	0	10	38
Alveolates-Ciliates_Stramenopiles-MAST	KJ763611.1.1765_U	Alveolates-Ciliates	Oligohymenophorea	Eukaryota; Alveolata; Ciliophora; Oligohymenophorea; Scuticociliatia; Scuticociliatia-1; Scuticociliatia-1_X; Scuticociliatia-1_X_sp.;	HM163291.1.1682_U	Stramenopiles-MAST	MAST-3	Eukaryota; Stramenopiles; Stramenopiles_X; MAST; MAST-3; MAST-3I; MAST-3I_X; MAST-3I_X_sp.;	-0.63849	-0.63849	-0.63849	1	5	15	-4	0.025	0.355805	0.134899	-0.706969	0.003206	-4	0.229925	0.343663	-0.802503	0.000317	-4	0.113584	0.195235	2e-06	0.363629	0	10	39
Alveolates-Ciliates_Stramenopiles-MAST	KJ763611.1.1765_U	Alveolates-Ciliates	Oligohymenophorea	Eukaryota; Alveolata; Ciliophora; Oligohymenophorea; Scuticociliatia; Scuticociliatia-1; Scuticociliatia-1_X; Scuticociliatia-1_X_sp.;	AB771842.1.1677_U	Stramenopiles-MAST	MAST-2	Eukaryota; Stramenopiles; Stramenopiles_X; MAST; MAST-2; MAST-2A; MAST-2A_X; MAST-2A_X_sp.;	0.640176	0.640176	0.640176	6	1	12	5	0.036	-0.596762	0.00699	0.629237	0.011962	4	-0.581025	0.009085	0.654847	0.011035	5	0.137718	0.029506	3e-06	0.034758	3e-06	10	49
Alveolates-Ciliates_Alveolates-Ciliates	KJ763611.1.1765_U	Alveolates-Ciliates	Oligohymenophorea	Eukaryota; Alveolata; Ciliophora; Oligohymenophorea; Scuticociliatia; Scuticociliatia-1; Scuticociliatia-1_X; Scuticociliatia-1_X_sp.;	EF100315.1.1329_U	Alveolates-Ciliates	Spirotrichea	Eukaryota; Alveolata; Ciliophora; Spirotrichea; Strombidiida; Strombidiidae_G; Strombidiidae_G_X; Strombidiidae_G_X_sp.;	0.650789	0.650789	0.650789	1	1	19	0	0.016	0.659431	0.00213	0.659431	0.00213	0	0.651735	0.0025	0.651735	0.0025	0	0.088365	0.013588	1e-06	0.014369	1e-06	10	51
Alveolates-Ciliates_Stramenopiles-Other	KJ763611.1.1765_U	Alveolates-Ciliates	Oligohymenophorea	Eukaryota; Alveolata; Ciliophora; Oligohymenophorea; Scuticociliatia; Scuticociliatia-1; Scuticociliatia-1_X; Scuticociliatia-1_X_sp.;	EU499990.1.824_U	Stramenopiles-Other	Triparma	Eukaryota; Stramenopiles; Ochrophyta; Bolidophyceae; Parmales; Triparmaceae; Triparma; Triparma_eleuthera;	0.822358	0.822358	0.822358	1	1	19	0	0	0.892412	0	0.892412	0	0	0.863417	2e-06	0.863417	2e-06	0	0	4.4e-05	0	0.000146	0	10	59
Alveolates-Ciliates_Alveolates-Dinoflagellates	KJ763611.1.1765_U	Alveolates-Ciliates	Oligohymenophorea	Eukaryota; Alveolata; Ciliophora; Oligohymenophorea; Scuticociliatia; Scuticociliatia-1; Scuticociliatia-1_X; Scuticociliatia-1_X_sp.;	GU825000.1.1197_U	Alveolates-Dinoflagellates	Dinophyceae	Eukaryota; Alveolata; Dinophyta; Dinophyceae; Dinophyceae_X; Dinophyceae_XX; Dinophyceae_XXX; Dinophyceae_XXX_sp.;	0.865808	0.865808	0.865808	1	1	19	0	0	0.874099	1e-06	0.874099	1e-06	0	0.865292	2e-06	0.865292	2e-06	0	0	8.4e-05	0	0.000137	0	10	64
Alveolates-Ciliates_Alveolates-Dinoflagellates	KJ763611.1.1765_U	Alveolates-Ciliates	Oligohymenophorea	Eukaryota; Alveolata; Ciliophora; Oligohymenophorea; Scuticociliatia; Scuticociliatia-1; Scuticociliatia-1_X; Scuticociliatia-1_X_sp.;	HE611580.1.1746_U	Alveolates-Dinoflagellates	Gyrodinium	Eukaryota; Alveolata; Dinophyta; Dinophyceae; Dinophyceae_X; Dinophyceae_XX; Gyrodinium; Gyrodinium_sp.;	-0.703269	-0.703269	-0.703269	1	1	19	0	0.001	-0.730605	0.000381	-0.730605	0.000381	0	-0.741001	0.000284	-0.741001	0.000284	0	0.017494	0.004298	1e-06	0.003318	0	10	65
Alveolates-Ciliates_Alveolates-Dinoflagellates	KJ763611.1.1765_U	Alveolates-Ciliates	Oligohymenophorea	Eukaryota; Alveolata; Ciliophora; Oligohymenophorea; Scuticociliatia; Scuticociliatia-1; Scuticociliatia-1_X; Scuticociliatia-1_X_sp.;	HM581766.1.1782_U	Alveolates-Dinoflagellates	Prorocentrum	Eukaryota; Alveolata; Dinophyta; Dinophyceae; Dinophyceae_X; Dinophyceae_XX; Prorocentrum; Prorocentrum_sp.;	-0.712253	-0.712253	-0.712253	2	2	18	0	0.005	-0.794043	4.9e-05	-0.794043	4.9e-05	0	-0.752084	0.000204	-0.752084	0.000204	0	0.0456	0.001077	0	0.002663	0	10	66
Alveolates-Ciliates_Alveolates-Dinoflagellates	KJ763611.1.1765_U	Alveolates-Ciliates	Oligohymenophorea	Eukaryota; Alveolata; Ciliophora; Oligohymenophorea; Scuticociliatia; Scuticociliatia-1; Scuticociliatia-1_X; Scuticociliatia-1_X_sp.;	EU500118.1.810_U	Alveolates-Dinoflagellates	Gymnodinium	Eukaryota; Alveolata; Dinophyta; Dinophyceae; Dinophyceae_X; Dinophyceae_XX; Gymnodinium; Gymnodinium_sp.;	-0.62442	-0.62442	-0.62442	3	2	14	1	0.037	-0.264998	0.272891	-0.563147	0.036004	-5	-0.183494	0.452079	-0.534848	0.022197	1	0.139515	0.296929	5e-06	0.423486	4e-06	10	67
Alveolates-Ciliates_Alveolates-Ciliates	KJ763611.1.1765_U	Alveolates-Ciliates	Oligohymenophorea	Eukaryota; Alveolata; Ciliophora; Oligohymenophorea; Scuticociliatia; Scuticociliatia-1; Scuticociliatia-1_X; Scuticociliatia-1_X_sp.;	JX188331.1.1726_U	Alveolates-Ciliates	Oligohymenophorea	Eukaryota; Alveolata; Ciliophora; Oligohymenophorea; Scuticociliatia; Scuticociliatia-1; Scuticociliatia-1_X; Scuticociliatia-1_X_sp.;	0.750911	0.750911	0.750911	2	2	18	0	0.001	0.781803	7.7e-05	0.781803	7.7e-05	0	0.771391	0.00011	0.771391	0.00011	0	0.017494	0.00144	0	0.001793	0	10	69
Alveolates-Ciliates_Alveolates-Dinoflagellates	KJ763611.1.1765_U	Alveolates-Ciliates	Oligohymenophorea	Eukaryota; Alveolata; Ciliophora; Oligohymenophorea; Scuticociliatia; Scuticociliatia-1; Scuticociliatia-1_X; Scuticociliatia-1_X_sp.;	HM561067.1.974_U	Alveolates-Dinoflagellates	Dinophyceae	Eukaryota; Alveolata; Dinophyta; Dinophyceae; Dinophyceae_X; Dinophyceae_XX; Dinophyceae_XXX; Dinophyceae_XXX_sp.;	0.779762	0.779762	0.779762	1	1	19	0	0.001	0.880548	1e-06	0.880548	1e-06	0	0.7828	7.4e-05	0.7828	7.4e-05	0	0.017494	7.1e-05	0	0.001389	0	10	71
Alveolates-Ciliates_Alveolates-Dinoflagellates	KJ763611.1.1765_U	Alveolates-Ciliates	Oligohymenophorea	Eukaryota; Alveolata; Ciliophora; Oligohymenophorea; Scuticociliatia; Scuticociliatia-1; Scuticociliatia-1_X; Scuticociliatia-1_X_sp.;	EU780629.1.1715_U	Alveolates-Dinoflagellates	Dinophyceae	Eukaryota; Alveolata; Dinophyta; Dinophyceae; Dinophyceae_X; Dinophyceae_XX; Dinophyceae_XXX; Dinophyceae_XXX_sp.;	0.634557	0.634557	0.634557	1	2	15	-1	0.021	0.25267	0.296648	0.62523	0.005525	-1	0.342255	0.151481	0.648425	0.003606	-1	0.10319	0.31117	2e-06	0.223626	2e-06	10	73
Alveolates-Ciliates_Alveolates-Ciliates	KJ763611.1.1765_U	Alveolates-Ciliates	Oligohymenophorea	Eukaryota; Alveolata; Ciliophora; Oligohymenophorea; Scuticociliatia; Scuticociliatia-1; Scuticociliatia-1_X; Scuticociliatia-1_X_sp.;	AY665059.1.1720_U	Alveolates-Ciliates	Oligohymenophorea	Eukaryota; Alveolata; Ciliophora; Oligohymenophorea; Scuticociliatia; Scuticociliatia-1; Scuticociliatia-1_X; Scuticociliatia-1_X_sp.;	0.857653	0.857653	0.857653	1	1	19	0	0	0.942406	0	0.942406	0	0	0.852502	4e-06	0.852502	4e-06	0	0	2e-06	0	0.000205	0	10	77
Alveolates-Ciliates_Rhizaria-Acantharia	KJ763611.1.1765_U	Alveolates-Ciliates	Oligohymenophorea	Eukaryota; Alveolata; Ciliophora; Oligohymenophorea; Scuticociliatia; Scuticociliatia-1; Scuticociliatia-1_X; Scuticociliatia-1_X_sp.;	HM561210.1.973_U	Rhizaria-Acantharia	Acantharea	Eukaryota; Rhizaria; Radiolaria; Acantharea; Acantharea_X; Acantharea_XX; Acantharea_XXX; Acantharea_XXX_sp.;	0.638066	0.638066	0.638066	1	1	19	0	0.029	0.798701	4.1e-05	0.798701	4.1e-05	0	0.685689	0.001192	0.685689	0.001192	0	0.123397	0.00095	0	0.008659	1e-06	10	80
Alveolates-Ciliates_Alveolates-Dinoflagellates	KJ763611.1.1765_U	Alveolates-Ciliates	Oligohymenophorea	Eukaryota; Alveolata; Ciliophora; Oligohymenophorea; Scuticociliatia; Scuticociliatia-1; Scuticociliatia-1_X; Scuticociliatia-1_X_sp.;	GU823932.1.1202_U	Alveolates-Dinoflagellates	Dinophyceae	Eukaryota; Alveolata; Dinophyta; Dinophyceae; Dinophyceae_X; Dinophyceae_XX; Dinophyceae_XXX; Dinophyceae_XXX_sp.;	0.63429	0.63429	0.63429	6	2	13	4	0.027	-0.341959	0.151859	0.769442	0.000797	4	-0.429218	0.066676	0.767193	0.000843	4	0.118689	0.210266	1e-06	0.133581	1e-06	10	81
Alveolates-Ciliates_Alveolates-Ciliates	KJ763611.1.1765_U	Alveolates-Ciliates	Oligohymenophorea	Eukaryota; Alveolata; Ciliophora; Oligohymenophorea; Scuticociliatia; Scuticociliatia-1; Scuticociliatia-1_X; Scuticociliatia-1_X_sp.;	JX567497.1.1529_U	Alveolates-Ciliates	Spirotrichea	Eukaryota; Alveolata; Ciliophora; Spirotrichea; Tintinnida; Tintinnidae; Steenstrupiella; Steenstrupiella_steenstrupii;	0.666978	0.666978	0.666978	1	2	18	-1	0.015	0.294264	0.221371	0.711638	0.000926	-1	0.341249	0.152765	0.721447	0.000726	-1	0.085181	0.26277	1e-06	0.224671	1e-06	10	85
Alveolates-Ciliates_Alveolates-Dinoflagellates	KJ763611.1.1765_U	Alveolates-Ciliates	Oligohymenophorea	Eukaryota; Alveolata; Ciliophora; Oligohymenophorea; Scuticociliatia; Scuticociliatia-1; Scuticociliatia-1_X; Scuticociliatia-1_X_sp.;	EU793087.1.924_U	Alveolates-Dinoflagellates	Dinophyceae	Eukaryota; Alveolata; Dinophyta; Dinophyceae; Dinophyceae_X; Dinophyceae_XX; Dinophyceae_XXX; Dinophyceae_XXX_sp.;	-0.659228	-0.659228	-0.659228	1	1	19	0	0.023	-0.661354	0.002045	-0.661354	0.002045	0	-0.70645	0.000722	-0.70645	0.000722	0	0.108834	0.013241	1e-06	0.006172	1e-06	10	97
Alveolates-Ciliates_Alveolates-Syndiniales	KJ763611.1.1765_U	Alveolates-Ciliates	Oligohymenophorea	Eukaryota; Alveolata; Ciliophora; Oligohymenophorea; Scuticociliatia; Scuticociliatia-1; Scuticociliatia-1_X; Scuticociliatia-1_X_sp.;	EF172977.1.1676_U	Alveolates-Syndiniales	Dino-Group-II	Eukaryota; Alveolata; Dinophyta; Syndiniales; Dino-Group-II; Dino-Group-II-Clade-7; Dino-Group-II-Clade-7_X; Dino-Group-II-Clade-7_X_sp.;	0.764092	0.764092	0.764092	1	1	15	0	0.001	0.738688	0.000304	0.738688	0.000304	0	0.779095	8.5e-05	0.779095	8.5e-05	0	0.017494	0.003689	0	0.001515	0	10	100
Alveolates-Ciliates_Alveolates-Dinoflagellates	KJ763611.1.1765_U	Alveolates-Ciliates	Oligohymenophorea	Eukaryota; Alveolata; Ciliophora; Oligohymenophorea; Scuticociliatia; Scuticociliatia-1; Scuticociliatia-1_X; Scuticociliatia-1_X_sp.;	KJ759535.1.1800_U	Alveolates-Dinoflagellates	Dinophyceae	Eukaryota; Alveolata; Dinophyta; Dinophyceae; Dinophyceae_X; Dinophyceae_XX; Dinophyceae_XXX; Dinophyceae_XXX_sp.;	0.729438	0.729438	0.729438	1	1	19	0	0.007	0.721219	0.000493	0.721219	0.000493	0	0.752084	0.000204	0.752084	0.000204	0	0.055193	0.005006	1e-06	0.002663	0	10	101
Alveolates-Ciliates_Alveolates-Syndiniales	KJ763611.1.1765_U	Alveolates-Ciliates	Oligohymenophorea	Eukaryota; Alveolata; Ciliophora; Oligohymenophorea; Scuticociliatia; Scuticociliatia-1; Scuticociliatia-1_X; Scuticociliatia-1_X_sp.;	EU793278.1.1575_U	Alveolates-Syndiniales	Dino-Group-II	Eukaryota; Alveolata; Dinophyta; Syndiniales; Dino-Group-II; Dino-Group-II-Clade-6; Dino-Group-II-Clade-6_X; Dino-Group-II-Clade-6_X_sp.;	0.718664	0.718664	0.718664	1	1	19	0	0.007	0.713615	0.000602	0.713615	0.000602	0	0.753191	0.000197	0.753191	0.000197	0	0.055193	0.005701	1e-06	0.002601	0	10	109
Alveolates-Ciliates_Alveolates-Dinoflagellates	KJ763611.1.1765_U	Alveolates-Ciliates	Oligohymenophorea	Eukaryota; Alveolata; Ciliophora; Oligohymenophorea; Scuticociliatia; Scuticociliatia-1; Scuticociliatia-1_X; Scuticociliatia-1_X_sp.;	AY664921.1.1754_U	Alveolates-Dinoflagellates	Prorocentrum	Eukaryota; Alveolata; Dinophyta; Dinophyceae; Dinophyceae_X; Dinophyceae_XX; Prorocentrum; Prorocentrum_sp.;	-0.753171	-0.753171	-0.753171	2	2	18	0	0.001	-0.625934	0.004147	-0.625934	0.004147	0	-0.77173	0.000109	-0.77173	0.000109	0	0.017494	0.021039	2e-06	0.001777	0	10	111
Alveolates-Ciliates_Alveolates-Ciliates	KJ763611.1.1765_U	Alveolates-Ciliates	Oligohymenophorea	Eukaryota; Alveolata; Ciliophora; Oligohymenophorea; Scuticociliatia; Scuticociliatia-1; Scuticociliatia-1_X; Scuticociliatia-1_X_sp.;	DQ120009.1.1729_U	Alveolates-Ciliates	Litostomatea	Eukaryota; Alveolata; Ciliophora; Litostomatea; Cyclotrichia; Cyclotrichia_X; Cyclotrichia_XX; Cyclotrichia_XX_sp.;	0.744278	0.744278	0.744278	1	1	19	0	0.005	0.817345	1.9e-05	0.817345	1.9e-05	0	0.799474	4e-05	0.799474	4e-05	0	0.0456	0.000548	0	0.000938	0	10	113
Alveolates-Ciliates_Stramenopiles-MAST	KJ763611.1.1765_U	Alveolates-Ciliates	Oligohymenophorea	Eukaryota; Alveolata; Ciliophora; Oligohymenophorea; Scuticociliatia; Scuticociliatia-1; Scuticociliatia-1_X; Scuticociliatia-1_X_sp.;	KC582992.1.1792_U	Stramenopiles-MAST	MAST-3	Eukaryota; Stramenopiles; Stramenopiles_X; MAST; MAST-3; MAST-3L; MAST-3L_X; MAST-3L_X_sp.;	0.694979	0.694979	0.694979	1	1	19	0	0.005	0.861245	2e-06	0.861245	2e-06	0	0.735733	0.00033	0.735733	0.00033	0	0.0456	0.000137	0	0.003652	0	10	119
Alveolates-Ciliates_Alveolates-Ciliates	KJ763611.1.1765_U	Alveolates-Ciliates	Oligohymenophorea	Eukaryota; Alveolata; Ciliophora; Oligohymenophorea; Scuticociliatia; Scuticociliatia-1; Scuticociliatia-1_X; Scuticociliatia-1_X_sp.;	KC582955.1.1774_U	Alveolates-Ciliates	Spirotrichea	Eukaryota; Alveolata; Ciliophora; Spirotrichea; Strombidiida; Strombidiida_X; Strombidiida_XX; Strombidiida_XX_sp.;	0.744675	0.744675	0.744675	1	1	19	0	0.002	0.748318	0.000229	0.748318	0.000229	0	0.795086	4.7e-05	0.795086	4.7e-05	0	0.026563	0.003014	0	0.001038	0	10	125
Alveolates-Ciliates_Haptophytes	KJ763611.1.1765_U	Alveolates-Ciliates	Oligohymenophorea	Eukaryota; Alveolata; Ciliophora; Oligohymenophorea; Scuticociliatia; Scuticociliatia-1; Scuticociliatia-1_X; Scuticociliatia-1_X_sp.;	HG970975	Haptophytes	Haptophyta	Eukaryota; Hacrobia; Haptophyta; Haptophyta_X; Haptophyta_XX; Haptophyta_XXX; Haptophyta_XXXX; Haptophyta_XXXX_sp.;	-0.760884	-0.760884	-0.760884	1	1	19	0	0	-0.766445	0.00013	-0.766445	0.00013	0	-0.828358	1.2e-05	-0.828358	1.2e-05	0	0	0.002065	0	0.000439	0	10	126
Alveolates-Ciliates_Alveolates-Syndiniales	KJ763611.1.1765_U	Alveolates-Ciliates	Oligohymenophorea	Eukaryota; Alveolata; Ciliophora; Oligohymenophorea; Scuticociliatia; Scuticociliatia-1; Scuticociliatia-1_X; Scuticociliatia-1_X_sp.;	GU824677.1.1204_U	Alveolates-Syndiniales	Dino-Group-II	Eukaryota; Alveolata; Dinophyta; Syndiniales; Dino-Group-II; Dino-Group-II-Clade-10-and-11; Dino-Group-II-Clade-10-and-11_X; Dino-Group-II-Clade-10-and-11_X_sp.;	0.627803	0.627803	0.627803	1	1	19	0	0.044	0.711341	0.000638	0.711341	0.000638	0	0.656127	0.002283	0.656127	0.002283	0	0.151655	0.005962	1e-06	0.013509	1e-06	10	135
Alveolates-Ciliates_Stramenopiles-Diatoms	KJ763611.1.1765_U	Alveolates-Ciliates	Oligohymenophorea	Eukaryota; Alveolata; Ciliophora; Oligohymenophorea; Scuticociliatia; Scuticociliatia-1; Scuticociliatia-1_X; Scuticociliatia-1_X_sp.;	GU822947.1.1074_U	Stramenopiles-Diatoms	Haslea	Eukaryota; Stramenopiles; Ochrophyta; Bacillariophyta; Bacillariophyta_X; Raphid-pennate; Haslea; Haslea_sp.;	0.825015	0.825015	0.825015	2	2	18	0	0	0.783984	7.1e-05	0.783984	7.1e-05	0	0.779095	8.5e-05	0.779095	8.5e-05	0	0	0.001369	0	0.001515	0	10	139
Alveolates-Ciliates_Stramenopiles-Chrysophytes	KJ763611.1.1765_U	Alveolates-Ciliates	Oligohymenophorea	Eukaryota; Alveolata; Ciliophora; Oligohymenophorea; Scuticociliatia; Scuticociliatia-1; Scuticociliatia-1_X; Scuticociliatia-1_X_sp.;	KC582997.1.1775_U	Stramenopiles-Chrysophytes	Chrysophyceae_Clade-I	Eukaryota; Stramenopiles; Ochrophyta; Chrysophyceae; Chrysophyceae_X; Chrysophyceae_Clade-I; Chrysophyceae_Clade-I_X; Chrysophyceae_Clade-I_X_sp.;	0.669398	0.669398	0.669398	1	1	19	0	0.015	0.819875	1.7e-05	0.819875	1.7e-05	0	0.755273	0.000185	0.755273	0.000185	0	0.085181	0.000515	0	0.002493	0	10	142
Alveolates-Ciliates_Stramenopiles-MAST	KJ763611.1.1765_U	Alveolates-Ciliates	Oligohymenophorea	Eukaryota; Alveolata; Ciliophora; Oligohymenophorea; Scuticociliatia; Scuticociliatia-1; Scuticociliatia-1_X; Scuticociliatia-1_X_sp.;	AJ402350.1.1758_U	Stramenopiles-MAST	MAST-1	Eukaryota; Stramenopiles; Stramenopiles_X; MAST; MAST-1; MAST-1D; MAST-1D_X; MAST-1D_X_sp.;	-0.650495	-0.650495	-0.650495	1	1	19	0	0.021	-0.853895	3e-06	-0.853895	3e-06	0	-0.708516	0.000685	-0.708516	0.000685	0	0.10319	0.000176	0	0.005929	1e-06	10	150
Alveolates-Dinoflagellates_Alveolates-Dinoflagellates	KC771213.1.1796_U	Alveolates-Dinoflagellates	Dinophyceae	Eukaryota; Alveolata; Dinophyta; Dinophyceae; Dinophyceae_X; Dinophyceae_XX; Dinophyceae_XXX; Dinophyceae_XXX_sp.;	EU087269.1.895_U	Alveolates-Dinoflagellates	Pfiesteriaceae	Eukaryota; Alveolata; Dinophyta; Dinophyceae; Dinophyceae_X; Pfiesteriaceae; Pfiesteriaceae_X; Pfiesteriaceae_X_sp.;	0.756581	0.756581	0.756581	2	2	13	0	0	0.618437	0.004765	0.618437	0.004765	0	0.689808	0.001083	0.689808	0.001083	0	0	0.022937	2e-06	0.008143	1e-06	11	22
Alveolates-Dinoflagellates_Alveolates-Ciliates	KC771213.1.1796_U	Alveolates-Dinoflagellates	Dinophyceae	Eukaryota; Alveolata; Dinophyta; Dinophyceae; Dinophyceae_X; Dinophyceae_XX; Dinophyceae_XXX; Dinophyceae_XXX_sp.;	KJ759341.1.1721_U	Alveolates-Ciliates	Phyllopharyngea	Eukaryota; Alveolata; Ciliophora; Phyllopharyngea; Cyrtophoria; Chlamydodontidae; Chlamydodon; Chlamydodon_sp.;	-0.628301	-0.628301	-0.628301	6	6	13	0	0.046	-0.566491	0.011446	-0.566491	0.011446	0	-0.502858	0.028202	-0.502858	0.028202	0	0.154843	0.04046	3e-06	0.075505	5e-06	11	24
Alveolates-Dinoflagellates_Alveolates-Dinoflagellates	KC771213.1.1796_U	Alveolates-Dinoflagellates	Dinophyceae	Eukaryota; Alveolata; Dinophyta; Dinophyceae; Dinophyceae_X; Dinophyceae_XX; Dinophyceae_XXX; Dinophyceae_XXX_sp.;	GU825315.1.1202_U	Alveolates-Dinoflagellates	Dinophyceae	Eukaryota; Alveolata; Dinophyta; Dinophyceae; Dinophyceae_X; Dinophyceae_XX; Dinophyceae_XXX; Dinophyceae_XXX_sp.;	0.644972	0.644972	0.644972	1	1	14	0	0.027	0.552205	0.014225	0.552205	0.014225	0	0.659931	0.002108	0.659931	0.002108	0	0.118689	0.04642	3e-06	0.012711	1e-06	11	32
Alveolates-Dinoflagellates_Alveolates-Ciliates	KC771213.1.1796_U	Alveolates-Dinoflagellates	Dinophyceae	Eukaryota; Alveolata; Dinophyta; Dinophyceae; Dinophyceae_X; Dinophyceae_XX; Dinophyceae_XXX; Dinophyceae_XXX_sp.;	KY290313.1.1621_U	Alveolates-Ciliates	Spirotrichea	Eukaryota; Alveolata; Ciliophora; Spirotrichea; Choreotrichida; Leegaardiellidae_B; Leegaardiella; Leegaardiella_sp.;	-0.715764	-0.715764	-0.715764	1	1	19	0	0.007	-0.691948	0.001029	-0.691948	0.001029	0	-0.74703	0.000238	-0.74703	0.000238	0	0.055193	0.008231	1e-06	0.002926	0	11	36
Alveolates-Dinoflagellates_Alveolates-Dinoflagellates	KC771213.1.1796_U	Alveolates-Dinoflagellates	Dinophyceae	Eukaryota; Alveolata; Dinophyta; Dinophyceae; Dinophyceae_X; Dinophyceae_XX; Dinophyceae_XXX; Dinophyceae_XXX_sp.;	KF129831.1.1758_U	Alveolates-Dinoflagellates	Dinophyceae	Eukaryota; Alveolata; Dinophyta; Dinophyceae; Dinophyceae_X; Dinophyceae_XX; Dinophyceae_XXX; Dinophyceae_XXX_sp.;	0.649997	0.649997	0.649997	1	1	14	0	0.025	0.566162	0.011505	0.566162	0.011505	0	0.685014	0.001211	0.685014	0.001211	0	0.113584	0.04059	3e-06	0.008737	1e-06	11	40
Alveolates-Dinoflagellates_Stramenopiles-MAST	KC771213.1.1796_U	Alveolates-Dinoflagellates	Dinophyceae	Eukaryota; Alveolata; Dinophyta; Dinophyceae; Dinophyceae_X; Dinophyceae_XX; Dinophyceae_XXX; Dinophyceae_XXX_sp.;	HM135065.1.1732_U	Stramenopiles-MAST	MAST-2	Eukaryota; Stramenopiles; Stramenopiles_X; MAST; MAST-2; MAST-2A; MAST-2A_X; MAST-2A_X_sp.;	0.648592	0.648592	0.648592	1	4	11	-3	0.029	0.13994	0.56773	0.697014	0.003878	-4	-0.01715	0.944443	0.756054	0.00111	-4	0.123397	0.443115	2e-06	0.608286	1e-06	11	62
Alveolates-Dinoflagellates_Alveolates-Ciliates	KC771213.1.1796_U	Alveolates-Dinoflagellates	Dinophyceae	Eukaryota; Alveolata; Dinophyta; Dinophyceae; Dinophyceae_X; Dinophyceae_XX; Dinophyceae_XXX; Dinophyceae_XXX_sp.;	KF129779.1.1734_U	Alveolates-Ciliates	Spirotrichea	Eukaryota; Alveolata; Ciliophora; Spirotrichea; Strombidiida; Tontoniidae_A; Spirotontonia; Spirotontonia_sp.;	0.683583	0.683583	0.683583	4	1	15	3	0.015	-0.124271	0.612238	0.743568	0.000961	3	-0.072056	0.769412	0.816509	0.000114	3	0.085181	0.45968	1e-06	0.554877	0	11	72
Alveolates-Dinoflagellates_Alveolates-Ciliates	KC771213.1.1796_U	Alveolates-Dinoflagellates	Dinophyceae	Eukaryota; Alveolata; Dinophyta; Dinophyceae; Dinophyceae_X; Dinophyceae_XX; Dinophyceae_XXX; Dinophyceae_XXX_sp.;	AY665059.1.1720_U	Alveolates-Ciliates	Oligohymenophorea	Eukaryota; Alveolata; Ciliophora; Oligohymenophorea; Scuticociliatia; Scuticociliatia-1; Scuticociliatia-1_X; Scuticociliatia-1_X_sp.;	-0.715748	-0.715748	-0.715748	3	3	12	0	0.001	-0.596299	0.007046	-0.596299	0.007046	0	-0.621979	0.004464	-0.621979	0.004464	0	0.017494	0.029632	2e-06	0.021026	2e-06	11	77
Alveolates-Dinoflagellates_Alveolates-Dinoflagellates	KC771213.1.1796_U	Alveolates-Dinoflagellates	Dinophyceae	Eukaryota; Alveolata; Dinophyta; Dinophyceae; Dinophyceae_X; Dinophyceae_XX; Dinophyceae_XXX; Dinophyceae_XXX_sp.;	GU822346.1.1073_U	Alveolates-Dinoflagellates	Protoperidinium	Eukaryota; Alveolata; Dinophyta; Dinophyceae; Dinophyceae_X; Dinophyceae_XX; Protoperidinium; Protoperidinium_sp.;	-0.652824	-0.652824	-0.652824	1	1	18	0	0.023	-0.587261	0.008201	-0.587261	0.008201	0	-0.603957	0.006173	-0.603957	0.006173	0	0.108834	0.03279	3e-06	0.026398	2e-06	11	95
Alveolates-Dinoflagellates_Alveolates-Dinoflagellates	KC771213.1.1796_U	Alveolates-Dinoflagellates	Dinophyceae	Eukaryota; Alveolata; Dinophyta; Dinophyceae; Dinophyceae_X; Dinophyceae_XX; Dinophyceae_XXX; Dinophyceae_XXX_sp.;	AY664921.1.1754_U	Alveolates-Dinoflagellates	Prorocentrum	Eukaryota; Alveolata; Dinophyta; Dinophyceae; Dinophyceae_X; Dinophyceae_XX; Prorocentrum; Prorocentrum_sp.;	0.635554	0.635554	0.635554	3	3	12	0	0.039	0.58896	0.007973	0.58896	0.007973	0	0.512088	0.024994	0.512088	0.024994	0	0.143381	0.032223	3e-06	0.069338	4e-06	11	111
Alveolates-Dinoflagellates_Alveolates-Dinoflagellates	KC771213.1.1796_U	Alveolates-Dinoflagellates	Dinophyceae	Eukaryota; Alveolata; Dinophyta; Dinophyceae; Dinophyceae_X; Dinophyceae_XX; Dinophyceae_XXX; Dinophyceae_XXX_sp.;	KJ759269.1.1802_U	Alveolates-Dinoflagellates	Dinophyceae	Eukaryota; Alveolata; Dinophyta; Dinophyceae; Dinophyceae_X; Dinophyceae_XX; Dinophyceae_XXX; Dinophyceae_XXX_sp.;	0.727253	0.727253	0.727253	2	1	15	1	0.002	0.181121	0.45805	0.678177	0.001979	1	0.343008	0.150524	0.717909	0.000794	1	0.026563	0.396075	1e-06	0.223152	1e-06	11	116
Alveolates-Dinoflagellates_Stramenopiles-Diatoms	KC771213.1.1796_U	Alveolates-Dinoflagellates	Dinophyceae	Eukaryota; Alveolata; Dinophyta; Dinophyceae; Dinophyceae_X; Dinophyceae_XX; Dinophyceae_XXX; Dinophyceae_XXX_sp.;	GU822947.1.1074_U	Stramenopiles-Diatoms	Haslea	Eukaryota; Stramenopiles; Ochrophyta; Bacillariophyta; Bacillariophyta_X; Raphid-pennate; Haslea; Haslea_sp.;	-0.676312	-0.676312	-0.676312	4	4	15	0	0.016	-0.568362	0.011117	-0.568362	0.011117	0	-0.540897	0.016787	-0.540897	0.016787	0	0.088365	0.039747	3e-06	0.053159	4e-06	11	139
Stramenopiles-MAST_Stramenopiles-Other	JQ782080.1.1737_U	Stramenopiles-MAST	MAST-3	Eukaryota; Stramenopiles; Stramenopiles_X; MAST; MAST-3; MAST-3I; MAST-3I_X; MAST-3I_X_sp.;	EU500162.1.816_U	Stramenopiles-Other	Florenciellales	Eukaryota; Stramenopiles; Ochrophyta; Dictyochophyceae; Dictyochophyceae_X; Florenciellales; Florenciellales_X; Florenciellales_X_sp.;	0.679207	0.679207	0.679207	1	1	19	0	0	0.844913	5e-06	0.844913	5e-06	0	0.749563	0.00022	0.749563	0.00022	0	0	0.00024	0	0.002803	0	13	15
Stramenopiles-MAST_Alveolates-Ciliates	JQ782080.1.1737_U	Stramenopiles-MAST	MAST-3	Eukaryota; Stramenopiles; Stramenopiles_X; MAST; MAST-3; MAST-3I; MAST-3I_X; MAST-3I_X_sp.;	KJ759341.1.1721_U	Alveolates-Ciliates	Phyllopharyngea	Eukaryota; Alveolata; Ciliophora; Phyllopharyngea; Cyrtophoria; Chlamydodontidae; Chlamydodon; Chlamydodon_sp.;	-0.667675	-0.667675	-0.667675	1	1	19	0	0.004	-0.702733	0.000792	-0.702733	0.000792	0	-0.753094	0.000198	-0.753094	0.000198	0	0.040295	0.006851	1e-06	0.002606	0	13	24
Stramenopiles-MAST_Alveolates-Ciliates	JQ782080.1.1737_U	Stramenopiles-MAST	MAST-3	Eukaryota; Stramenopiles; Stramenopiles_X; MAST; MAST-3; MAST-3I; MAST-3I_X; MAST-3I_X_sp.;	GU819492.1.1175_U	Alveolates-Ciliates	Spirotrichea	Eukaryota; Alveolata; Ciliophora; Spirotrichea; Strombidiida; Strombidiidae_J; Strombidiidae_J_X; Strombidiidae_J_X_sp.;	-0.700878	-0.700878	-0.700878	1	1	19	0	0.001	-0.757722	0.000171	-0.757722	0.000171	0	-0.762794	0.000146	-0.762794	0.000146	0	0.017494	0.002481	0	0.002161	0	13	25
Stramenopiles-MAST_Stramenopiles-MAST	JQ782080.1.1737_U	Stramenopiles-MAST	MAST-3	Eukaryota; Stramenopiles; Stramenopiles_X; MAST; MAST-3; MAST-3I; MAST-3I_X; MAST-3I_X_sp.;	JQ782004.1.1784_U	Stramenopiles-MAST	MAST-1	Eukaryota; Stramenopiles; Stramenopiles_X; MAST; MAST-1; MAST-1C; MAST-1C_X; MAST-1C_X_sp.;	0.673003	0.673003	0.673003	1	1	19	0	0.006	0.635774	0.003437	0.635774	0.003437	0	0.73975	0.000294	0.73975	0.000294	0	0.050667	0.018467	2e-06	0.003392	0	13	37
Stramenopiles-MAST_Alveolates-Dinoflagellates	JQ782080.1.1737_U	Stramenopiles-MAST	MAST-3	Eukaryota; Stramenopiles; Stramenopiles_X; MAST; MAST-3; MAST-3I; MAST-3I_X; MAST-3I_X_sp.;	KF129831.1.1758_U	Alveolates-Dinoflagellates	Dinophyceae	Eukaryota; Alveolata; Dinophyta; Dinophyceae; Dinophyceae_X; Dinophyceae_XX; Dinophyceae_XXX; Dinophyceae_XXX_sp.;	-0.555939	-0.555939	-0.555939	1	5	15	-4	0.049	0.17551	0.472326	-0.793346	0.000416	-4	0.210009	0.388168	-0.713341	0.002827	-4	0.160556	0.403024	1e-06	0.390027	1e-06	13	40
Stramenopiles-MAST_Stramenopiles-MAST	JQ782080.1.1737_U	Stramenopiles-MAST	MAST-3	Eukaryota; Stramenopiles; Stramenopiles_X; MAST; MAST-3; MAST-3I; MAST-3I_X; MAST-3I_X_sp.;	AB771842.1.1677_U	Stramenopiles-MAST	MAST-2	Eukaryota; Stramenopiles; Stramenopiles_X; MAST; MAST-2; MAST-2A; MAST-2A_X; MAST-2A_X_sp.;	0.719691	0.719691	0.719691	1	1	19	0	0.001	0.817566	1.9e-05	0.817566	1.9e-05	0	0.720621	0.0005	0.720621	0.0005	0	0.017494	0.000546	0	0.004803	1e-06	13	49
Stramenopiles-MAST_Alveolates-Ciliates	JQ782080.1.1737_U	Stramenopiles-MAST	MAST-3	Eukaryota; Stramenopiles; Stramenopiles_X; MAST; MAST-3; MAST-3I; MAST-3I_X; MAST-3I_X_sp.;	EF100315.1.1329_U	Alveolates-Ciliates	Spirotrichea	Eukaryota; Alveolata; Ciliophora; Spirotrichea; Strombidiida; Strombidiidae_G; Strombidiidae_G_X; Strombidiidae_G_X_sp.;	-0.669107	-0.669107	-0.669107	1	1	19	0	0.004	-0.629064	0.003909	-0.629064	0.003909	0	-0.654615	0.002356	-0.654615	0.002356	0	0.040295	0.020254	2e-06	0.01383	1e-06	13	51
Stramenopiles-MAST_Stramenopiles-Other	JQ782080.1.1737_U	Stramenopiles-MAST	MAST-3	Eukaryota; Stramenopiles; Stramenopiles_X; MAST; MAST-3; MAST-3I; MAST-3I_X; MAST-3I_X_sp.;	EU499990.1.824_U	Stramenopiles-Other	Triparma	Eukaryota; Stramenopiles; Ochrophyta; Bolidophyceae; Parmales; Triparmaceae; Triparma; Triparma_eleuthera;	-0.641912	-0.641912	-0.641912	1	1	19	0	0.007	-0.663286	0.001963	-0.663286	0.001963	0	-0.682405	0.001286	-0.682405	0.001286	0	0.055193	0.012867	1e-06	0.009137	1e-06	13	59
Stramenopiles-MAST_Alveolates-Dinoflagellates	JQ782080.1.1737_U	Stramenopiles-MAST	MAST-3	Eukaryota; Stramenopiles; Stramenopiles_X; MAST; MAST-3; MAST-3I; MAST-3I_X; MAST-3I_X_sp.;	GU825000.1.1197_U	Alveolates-Dinoflagellates	Dinophyceae	Eukaryota; Alveolata; Dinophyta; Dinophyceae; Dinophyceae_X; Dinophyceae_XX; Dinophyceae_XXX; Dinophyceae_XXX_sp.;	-0.759508	-0.759508	-0.759508	1	1	19	0	0	-0.792801	5.2e-05	-0.792801	5.2e-05	0	-0.78714	6.4e-05	-0.78714	6.4e-05	0	0	0.001113	0	0.001243	0	13	64
Stramenopiles-MAST_Alveolates-Dinoflagellates	JQ782080.1.1737_U	Stramenopiles-MAST	MAST-3	Eukaryota; Stramenopiles; Stramenopiles_X; MAST; MAST-3; MAST-3I; MAST-3I_X; MAST-3I_X_sp.;	HM581766.1.1782_U	Alveolates-Dinoflagellates	Prorocentrum	Eukaryota; Alveolata; Dinophyta; Dinophyceae; Dinophyceae_X; Dinophyceae_XX; Prorocentrum; Prorocentrum_sp.;	0.618862	0.618862	0.618862	2	2	18	0	0.014	0.703471	0.000778	0.703471	0.000778	0	0.699876	0.00085	0.699876	0.00085	0	0.081741	0.0068	1e-06	0.006933	1e-06	13	66
Stramenopiles-MAST_Stramenopiles-MAST	JQ782080.1.1737_U	Stramenopiles-MAST	MAST-3	Eukaryota; Stramenopiles; Stramenopiles_X; MAST; MAST-3; MAST-3I; MAST-3I_X; MAST-3I_X_sp.;	JQ782035.1.1781_U	Stramenopiles-MAST	MAST-3	Eukaryota; Stramenopiles; Stramenopiles_X; MAST; MAST-3; MAST-3I; MAST-3I_X; MAST-3I_X_sp.;	0.631907	0.631907	0.631907	2	1	18	1	0.02	0.539941	0.017019	0.721206	0.000731	1	0.522933	0.0216	0.714071	0.000872	1	0.100183	0.052133	1e-06	0.063007	1e-06	13	68
Stramenopiles-MAST_Alveolates-Dinoflagellates	JQ782080.1.1737_U	Stramenopiles-MAST	MAST-3	Eukaryota; Stramenopiles; Stramenopiles_X; MAST; MAST-3; MAST-3I; MAST-3I_X; MAST-3I_X_sp.;	HM561067.1.974_U	Alveolates-Dinoflagellates	Dinophyceae	Eukaryota; Alveolata; Dinophyta; Dinophyceae; Dinophyceae_X; Dinophyceae_XX; Dinophyceae_XXX; Dinophyceae_XXX_sp.;	-0.738204	-0.738204	-0.738204	1	1	19	0	0.001	-0.806577	3e-05	-0.806577	3e-05	0	-0.755408	0.000184	-0.755408	0.000184	0	0.017494	0.000744	0	0.002485	0	13	71
Stramenopiles-MAST_Archaeplastids-Chlorophytes	JQ782080.1.1737_U	Stramenopiles-MAST	MAST-3	Eukaryota; Stramenopiles; Stramenopiles_X; MAST; MAST-3; MAST-3I; MAST-3I_X; MAST-3I_X_sp.;	EU143529.1.906_U	Archaeplastids-Chlorophytes	Pyramimonadales	Eukaryota; Archaeplastida; Chlorophyta; Pyramimonadales; Pyramimonadales_X; Pyramimonadales_XX; Pterosperma; Pterosperma_sp.;	0.659118	0.659118	0.659118	1	1	19	0	0.009	0.603212	0.006254	0.603212	0.006254	0	0.733133	0.000355	0.733133	0.000355	0	0.063892	0.027269	2e-06	0.003818	0	13	84
Stramenopiles-MAST_Alveolates-Ciliates	JQ782080.1.1737_U	Stramenopiles-MAST	MAST-3	Eukaryota; Stramenopiles; Stramenopiles_X; MAST; MAST-3; MAST-3I; MAST-3I_X; MAST-3I_X_sp.;	JX567497.1.1529_U	Alveolates-Ciliates	Spirotrichea	Eukaryota; Alveolata; Ciliophora; Spirotrichea; Tintinnida; Tintinnidae; Steenstrupiella; Steenstrupiella_steenstrupii;	-0.716582	-0.716582	-0.716582	1	2	18	-1	0.001	-0.379795	0.108743	-0.704777	0.001091	-1	-0.497793	0.030094	-0.710657	0.000948	-1	0.017494	0.170749	1e-06	0.078648	1e-06	13	85
Stramenopiles-MAST_Alveolates-Syndiniales	JQ782080.1.1737_U	Stramenopiles-MAST	MAST-3	Eukaryota; Stramenopiles; Stramenopiles_X; MAST; MAST-3; MAST-3I; MAST-3I_X; MAST-3I_X_sp.;	EU793278.1.1575_U	Alveolates-Syndiniales	Dino-Group-II	Eukaryota; Alveolata; Dinophyta; Syndiniales; Dino-Group-II; Dino-Group-II-Clade-6; Dino-Group-II-Clade-6_X; Dino-Group-II-Clade-6_X_sp.;	-0.683575	-0.683575	-0.683575	1	1	19	0	0.002	-0.706909	0.000714	-0.706909	0.000714	0	-0.699958	0.000848	-0.699958	0.000848	0	0.026563	0.006443	1e-06	0.006924	1e-06	13	109
Stramenopiles-MAST_Alveolates-Dinoflagellates	JQ782080.1.1737_U	Stramenopiles-MAST	MAST-3	Eukaryota; Stramenopiles; Stramenopiles_X; MAST; MAST-3; MAST-3I; MAST-3I_X; MAST-3I_X_sp.;	FN690221.1.1692_U	Alveolates-Dinoflagellates	Dinophyceae	Eukaryota; Alveolata; Dinophyta; Dinophyceae; Dinophyceae_X; Dinophyceae_XX; Dinophyceae_XXX; Dinophyceae_XXX_sp.;	0.621319	0.621319	0.621319	1	1	19	0	0.01	0.624869	0.00423	0.624869	0.00423	0	0.659329	0.002135	0.659329	0.002135	0	0.067958	0.021298	2e-06	0.012817	1e-06	13	118
Stramenopiles-MAST_Stramenopiles-Other	JQ782080.1.1737_U	Stramenopiles-MAST	MAST-3	Eukaryota; Stramenopiles; Stramenopiles_X; MAST; MAST-3; MAST-3I; MAST-3I_X; MAST-3I_X_sp.;	EF695169.1.817_U	Stramenopiles-Other	Florenciellales	Eukaryota; Stramenopiles; Ochrophyta; Dictyochophyceae; Dictyochophyceae_X; Florenciellales; Florenciellales_X; Florenciellales_X_sp.;	0.590124	0.590124	0.590124	2	3	17	-1	0.024	0.559955	0.012657	0.559955	0.012657	0	0.653446	0.002413	0.653446	0.002413	0	0.111069	0.042966	3e-06	0.014027	1e-06	13	121
Stramenopiles-MAST_Alveolates-Ciliates	JQ782080.1.1737_U	Stramenopiles-MAST	MAST-3	Eukaryota; Stramenopiles; Stramenopiles_X; MAST; MAST-3; MAST-3I; MAST-3I_X; MAST-3I_X_sp.;	KJ759417.1.1743_U	Alveolates-Ciliates	Spirotrichea	Eukaryota; Alveolata; Ciliophora; Spirotrichea; Choreotrichida; Leegaardiellidae_B; Leegaardiella; Leegaardiella_sp.;	-0.578488	-0.578488	-0.578488	1	2	17	-1	0.039	-0.074733	0.761079	-0.633997	0.004721	-1	-0.173587	0.477267	0.642349	0.024297	-7	0.143381	0.512888	2e-06	0.43662	4e-06	13	124
Stramenopiles-MAST_Alveolates-Ciliates	JQ782080.1.1737_U	Stramenopiles-MAST	MAST-3	Eukaryota; Stramenopiles; Stramenopiles_X; MAST; MAST-3; MAST-3I; MAST-3I_X; MAST-3I_X_sp.;	KC582955.1.1774_U	Alveolates-Ciliates	Spirotrichea	Eukaryota; Alveolata; Ciliophora; Spirotrichea; Strombidiida; Strombidiida_X; Strombidiida_XX; Strombidiida_XX_sp.;	-0.720483	-0.720483	-0.720483	1	1	19	0	0	-0.749145	0.000223	-0.749145	0.000223	0	-0.801243	3.7e-05	-0.801243	3.7e-05	0	0	0.002973	0	0.000904	0	13	125
Stramenopiles-MAST_Alveolates-Syndiniales	JQ782080.1.1737_U	Stramenopiles-MAST	MAST-3	Eukaryota; Stramenopiles; Stramenopiles_X; MAST; MAST-3; MAST-3I; MAST-3I_X; MAST-3I_X_sp.;	GU824677.1.1204_U	Alveolates-Syndiniales	Dino-Group-II	Eukaryota; Alveolata; Dinophyta; Syndiniales; Dino-Group-II; Dino-Group-II-Clade-10-and-11; Dino-Group-II-Clade-10-and-11_X; Dino-Group-II-Clade-10-and-11_X_sp.;	-0.566803	-0.566803	-0.566803	1	1	19	0	0.039	-0.596679	0.007	-0.596679	0.007	0	-0.556246	0.013389	-0.556246	0.013389	0	0.143381	0.029516	2e-06	0.045709	3e-06	13	135
Stramenopiles-MAST_Stramenopiles-Diatoms	JQ782080.1.1737_U	Stramenopiles-MAST	MAST-3	Eukaryota; Stramenopiles; Stramenopiles_X; MAST; MAST-3; MAST-3I; MAST-3I_X; MAST-3I_X_sp.;	GU822947.1.1074_U	Stramenopiles-Diatoms	Haslea	Eukaryota; Stramenopiles; Ochrophyta; Bacillariophyta; Bacillariophyta_X; Raphid-pennate; Haslea; Haslea_sp.;	-0.553617	-0.553617	-0.553617	2	2	18	0	0.049	-0.584858	0.008533	-0.584858	0.008533	0	-0.574773	0.010047	-0.574773	0.010047	0	0.160556	0.033643	3e-06	0.037184	3e-06	13	139
Stramenopiles-MAST_Stramenopiles-Chrysophytes	JQ782080.1.1737_U	Stramenopiles-MAST	MAST-3	Eukaryota; Stramenopiles; Stramenopiles_X; MAST; MAST-3; MAST-3I; MAST-3I_X; MAST-3I_X_sp.;	KC582997.1.1775_U	Stramenopiles-Chrysophytes	Chrysophyceae_Clade-I	Eukaryota; Stramenopiles; Ochrophyta; Chrysophyceae; Chrysophyceae_X; Chrysophyceae_Clade-I; Chrysophyceae_Clade-I_X; Chrysophyceae_Clade-I_X_sp.;	-0.619206	-0.619206	-0.619206	1	1	19	0	0.011	-0.668797	0.001743	-0.668797	0.001743	0	-0.672114	0.001621	-0.672114	0.001621	0	0.071521	0.011847	1e-06	0.010629	1e-06	13	142
Stramenopiles-MAST_Sal	JQ782080.1.1737_U	Stramenopiles-MAST	MAST-3	Eukaryota; Stramenopiles; Stramenopiles_X; MAST; MAST-3; MAST-3I; MAST-3I_X; MAST-3I_X_sp.;	Sal	Sal	NA	NA	0.648475	0.648475	0.648475	1	2	18	-1	0.007	0.444596	0.056492	0.710133	0.006533	6	0.508439	0.026227	0.686363	0.009576	6	0.055193	0.114016	2e-06	0.071643	3e-06	13	203
Alveolates-Dinoflagellates_Stramenopiles-MAST	GU823943.1.1199_U	Alveolates-Dinoflagellates	Dinophyceae	Eukaryota; Alveolata; Dinophyta; Dinophyceae; Dinophyceae_X; Dinophyceae_XX; Dinophyceae_XXX; Dinophyceae_XXX_sp.;	KF129967.1.1739_U	Stramenopiles-MAST	MAST-9	Eukaryota; Stramenopiles; Stramenopiles_X; MAST; MAST-9; MAST-9A; MAST-9A_X; MAST-9A_X_sp.;	-0.621158	-0.621158	-0.621158	4	4	16	0	0.044	-0.529464	0.019738	-0.529464	0.019738	0	-0.53617	0.017961	-0.53617	0.017961	0	0.151655	0.057573	4e-06	0.055612	4e-06	14	38
Alveolates-Dinoflagellates_Alveolates-Dinoflagellates	GU823943.1.1199_U	Alveolates-Dinoflagellates	Dinophyceae	Eukaryota; Alveolata; Dinophyta; Dinophyceae; Dinophyceae_X; Dinophyceae_XX; Dinophyceae_XXX; Dinophyceae_XXX_sp.;	HM561067.1.974_U	Alveolates-Dinoflagellates	Dinophyceae	Eukaryota; Alveolata; Dinophyta; Dinophyceae; Dinophyceae_X; Dinophyceae_XX; Dinophyceae_XXX; Dinophyceae_XXX_sp.;	-0.683202	-0.683202	-0.683202	1	1	19	0	0.011	-0.665467	0.001873	-0.665467	0.001873	0	-0.655179	0.002328	-0.655179	0.002328	0	0.071521	0.012454	1e-06	0.01372	1e-06	14	71
Alveolates-Dinoflagellates_Alveolates-Dinoflagellates	GU823943.1.1199_U	Alveolates-Dinoflagellates	Dinophyceae	Eukaryota; Alveolata; Dinophyta; Dinophyceae; Dinophyceae_X; Dinophyceae_XX; Dinophyceae_XXX; Dinophyceae_XXX_sp.;	GU823844.1.1196_U	Alveolates-Dinoflagellates	Dinophyceae	Eukaryota; Alveolata; Dinophyta; Dinophyceae; Dinophyceae_X; Dinophyceae_XX; Dinophyceae_XXX; Dinophyceae_XXX_sp.;	0.632153	0.632153	0.632153	4	2	13	2	0.047	0.184143	0.450454	-0.505337	0.054664	-4	0.019965	0.935341	0.512738	0.035324	2	0.156743	0.392297	6e-06	0.606228	5e-06	14	79
Alveolates-Dinoflagellates_Alveolates-Dinoflagellates	GU823943.1.1199_U	Alveolates-Dinoflagellates	Dinophyceae	Eukaryota; Alveolata; Dinophyta; Dinophyceae; Dinophyceae_X; Dinophyceae_XX; Dinophyceae_XXX; Dinophyceae_XXX_sp.;	AY664921.1.1754_U	Alveolates-Dinoflagellates	Prorocentrum	Eukaryota; Alveolata; Dinophyta; Dinophyceae; Dinophyceae_X; Dinophyceae_XX; Prorocentrum; Prorocentrum_sp.;	0.635138	0.635138	0.635138	2	2	18	0	0.03	0.545241	0.015763	0.545241	0.015763	0	0.632849	0.003636	0.632849	0.003636	0	0.125466	0.049495	3e-06	0.018418	2e-06	14	111
Alveolates-Dinoflagellates_Stramenopiles-Diatoms	GU823943.1.1199_U	Alveolates-Dinoflagellates	Dinophyceae	Eukaryota; Alveolata; Dinophyta; Dinophyceae; Dinophyceae_X; Dinophyceae_XX; Dinophyceae_XXX; Dinophyceae_XXX_sp.;	GU822947.1.1074_U	Stramenopiles-Diatoms	Haslea	Eukaryota; Stramenopiles; Ochrophyta; Bacillariophyta; Bacillariophyta_X; Raphid-pennate; Haslea; Haslea_sp.;	-0.661322	-0.661322	-0.661322	2	2	15	0	0.019	-0.677041	0.001452	-0.677041	0.001452	0	-0.627359	0.004037	-0.627359	0.004037	0	0.097312	0.010453	1e-06	0.019633	2e-06	14	139
Alveolates-Dinoflagellates_Stramenopiles-MAST	GU823943.1.1199_U	Alveolates-Dinoflagellates	Dinophyceae	Eukaryota; Alveolata; Dinophyta; Dinophyceae; Dinophyceae_X; Dinophyceae_XX; Dinophyceae_XXX; Dinophyceae_XXX_sp.;	AJ402350.1.1758_U	Stramenopiles-MAST	MAST-1	Eukaryota; Stramenopiles; Stramenopiles_X; MAST; MAST-1; MAST-1D; MAST-1D_X; MAST-1D_X_sp.;	0.679854	0.679854	0.679854	1	1	19	0	0.015	0.641955	0.003044	0.641955	0.003044	0	0.630188	0.003826	0.630188	0.003826	0	0.085181	0.017115	2e-06	0.019023	2e-06	14	150
Stramenopiles-Other_Stramenopiles-Chrysophytes	EU500162.1.816_U	Stramenopiles-Other	Florenciellales	Eukaryota; Stramenopiles; Ochrophyta; Dictyochophyceae; Dictyochophyceae_X; Florenciellales; Florenciellales_X; Florenciellales_X_sp.;	KC583138.1.1098_U	Stramenopiles-Chrysophytes	Chrysophyceae_Clade-H	Eukaryota; Stramenopiles; Ochrophyta; Chrysophyceae; Chrysophyceae_X; Chrysophyceae_Clade-H; Chrysophyceae_Clade-H_X; Chrysophyceae_Clade-H_X_sp.;	-0.694375	-0.694375	-0.694375	6	1	14	5	0.009	-0.267402	0.2684	-0.729707	0.003053	5	-0.384595	0.103982	-0.787601	0.000824	5	0.063892	0.294387	2e-06	0.17608	1e-06	15	20
Stramenopiles-Other_Alveolates-Dinoflagellates	EU500162.1.816_U	Stramenopiles-Other	Florenciellales	Eukaryota; Stramenopiles; Ochrophyta; Dictyochophyceae; Dictyochophyceae_X; Florenciellales; Florenciellales_X; Florenciellales_X_sp.;	EU087269.1.895_U	Alveolates-Dinoflagellates	Pfiesteriaceae	Eukaryota; Alveolata; Dinophyta; Dinophyceae; Dinophyceae_X; Pfiesteriaceae; Pfiesteriaceae_X; Pfiesteriaceae_X_sp.;	0.711228	0.711228	0.711228	3	3	17	0	0.001	0.67352	0.001571	0.67352	0.001571	0	0.646332	0.00279	0.646332	0.00279	0	0.017494	0.011035	1e-06	0.015406	1e-06	15	22
Stramenopiles-Other_Alveolates-Ciliates	EU500162.1.816_U	Stramenopiles-Other	Florenciellales	Eukaryota; Stramenopiles; Ochrophyta; Dictyochophyceae; Dictyochophyceae_X; Florenciellales; Florenciellales_X; Florenciellales_X_sp.;	KJ759341.1.1721_U	Alveolates-Ciliates	Phyllopharyngea	Eukaryota; Alveolata; Ciliophora; Phyllopharyngea; Cyrtophoria; Chlamydodontidae; Chlamydodon; Chlamydodon_sp.;	-0.74987	-0.74987	-0.74987	1	1	19	0	0	-0.78096	7.9e-05	-0.78096	7.9e-05	0	-0.789225	5.9e-05	-0.789225	5.9e-05	0	0	0.001465	0	0.00119	0	15	24
Stramenopiles-Other_Alveolates-Ciliates	EU500162.1.816_U	Stramenopiles-Other	Florenciellales	Eukaryota; Stramenopiles; Ochrophyta; Dictyochophyceae; Dictyochophyceae_X; Florenciellales; Florenciellales_X; Florenciellales_X_sp.;	GU819492.1.1175_U	Alveolates-Ciliates	Spirotrichea	Eukaryota; Alveolata; Ciliophora; Spirotrichea; Strombidiida; Strombidiidae_J; Strombidiidae_J_X; Strombidiidae_J_X_sp.;	-0.810664	-0.810664	-0.810664	1	1	19	0	0	-0.875781	1e-06	-0.875781	1e-06	0	-0.865402	2e-06	-0.865402	2e-06	0	0	8.4e-05	0	0.000137	0	15	25
Stramenopiles-Other_Alveolates-Syndiniales	EU500162.1.816_U	Stramenopiles-Other	Florenciellales	Eukaryota; Stramenopiles; Ochrophyta; Dictyochophyceae; Dictyochophyceae_X; Florenciellales; Florenciellales_X; Florenciellales_X_sp.;	FJ431723.1.830_U	Alveolates-Syndiniales	Dino-Group-III	Eukaryota; Alveolata; Dinophyta; Syndiniales; Dino-Group-III; Dino-Group-III_X; Dino-Group-III_XX; Dino-Group-III_XX_sp.;	0.739589	0.739589	0.739589	2	2	17	0	0.002	0.701715	0.000813	0.701715	0.000813	0	0.685589	0.001195	-0.829456	0.000131	-4	0.026563	0.006963	1e-06	0.008665	0	15	27
Stramenopiles-Other_Alveolates-Dinoflagellates	EU500162.1.816_U	Stramenopiles-Other	Florenciellales	Eukaryota; Stramenopiles; Ochrophyta; Dictyochophyceae; Dictyochophyceae_X; Florenciellales; Florenciellales_X; Florenciellales_X_sp.;	GU825315.1.1202_U	Alveolates-Dinoflagellates	Dinophyceae	Eukaryota; Alveolata; Dinophyta; Dinophyceae; Dinophyceae_X; Dinophyceae_XX; Dinophyceae_XXX; Dinophyceae_XXX_sp.;	0.795624	0.795624	0.795624	3	3	16	0	0	0.734113	0.000346	0.734113	0.000346	0	0.744609	0.000255	0.744609	0.000255	0	0	0.004039	0	0.003103	0	15	32
Stramenopiles-Other_Stramenopiles-MAST	EU500162.1.816_U	Stramenopiles-Other	Florenciellales	Eukaryota; Stramenopiles; Ochrophyta; Dictyochophyceae; Dictyochophyceae_X; Florenciellales; Florenciellales_X; Florenciellales_X_sp.;	JQ782004.1.1784_U	Stramenopiles-MAST	MAST-1	Eukaryota; Stramenopiles; Stramenopiles_X; MAST; MAST-1; MAST-1C; MAST-1C_X; MAST-1C_X_sp.;	0.666955	0.666955	0.666955	1	1	19	0	0.007	0.727181	0.000419	0.727181	0.000419	0	0.72178	0.000485	0.72178	0.000485	0	0.055193	0.00454	1e-06	0.004701	1e-06	15	37
Stramenopiles-Other_Stramenopiles-MAST	EU500162.1.816_U	Stramenopiles-Other	Florenciellales	Eukaryota; Stramenopiles; Ochrophyta; Dictyochophyceae; Dictyochophyceae_X; Florenciellales; Florenciellales_X; Florenciellales_X_sp.;	KF129967.1.1739_U	Stramenopiles-MAST	MAST-9	Eukaryota; Stramenopiles; Stramenopiles_X; MAST; MAST-9; MAST-9A; MAST-9A_X; MAST-9A_X_sp.;	-0.821274	-0.821274	-0.821274	1	1	19	0	0	-0.829348	1.1e-05	-0.829348	1.1e-05	0	-0.811369	2.5e-05	-0.811369	2.5e-05	0	0	0.000387	0	0.00068	0	15	38
Stramenopiles-Other_Stramenopiles-MAST	EU500162.1.816_U	Stramenopiles-Other	Florenciellales	Eukaryota; Stramenopiles; Ochrophyta; Dictyochophyceae; Dictyochophyceae_X; Florenciellales; Florenciellales_X; Florenciellales_X_sp.;	HM163291.1.1682_U	Stramenopiles-MAST	MAST-3	Eukaryota; Stramenopiles; Stramenopiles_X; MAST; MAST-3; MAST-3I; MAST-3I_X; MAST-3I_X_sp.;	0.641851	0.641851	0.641851	1	5	15	-4	0.031	-0.331627	0.165437	0.887927	1e-05	-4	-0.376289	0.112318	0.910775	2e-06	-4	0.127199	0.220616	0	0.185154	0	15	39
Stramenopiles-Other_Alveolates-Dinoflagellates	EU500162.1.816_U	Stramenopiles-Other	Florenciellales	Eukaryota; Stramenopiles; Ochrophyta; Dictyochophyceae; Dictyochophyceae_X; Florenciellales; Florenciellales_X; Florenciellales_X_sp.;	KF129831.1.1758_U	Alveolates-Dinoflagellates	Dinophyceae	Eukaryota; Alveolata; Dinophyta; Dinophyceae; Dinophyceae_X; Dinophyceae_XX; Dinophyceae_XXX; Dinophyceae_XXX_sp.;	0.750187	0.750187	0.750187	3	3	16	0	0.002	0.581328	0.009041	-0.783579	0.000548	-4	0.65504	0.002335	-0.800057	0.000342	-4	0.026563	0.03494	1e-06	0.013743	0	15	40
Stramenopiles-Other_Alveolates-Dinoflagellates	EU500162.1.816_U	Stramenopiles-Other	Florenciellales	Eukaryota; Stramenopiles; Ochrophyta; Dictyochophyceae; Dictyochophyceae_X; Florenciellales; Florenciellales_X; Florenciellales_X_sp.;	FJ217814.1.1521_U	Alveolates-Dinoflagellates	Azadinium	Eukaryota; Alveolata; Dinophyta; Dinophyceae; Dinophyceae_X; Dinophyceae_XX; Azadinium; Azadinium_spinosum;	0.661767	0.661767	0.661767	3	3	17	0	0.01	0.538302	0.017424	0.715579	0.008878	-7	0.531022	0.019313	0.720281	0.00824	-7	0.067958	0.05283	3e-06	0.058662	3e-06	15	43
Stramenopiles-Other_Stramenopiles-MAST	EU500162.1.816_U	Stramenopiles-Other	Florenciellales	Eukaryota; Stramenopiles; Ochrophyta; Dictyochophyceae; Dictyochophyceae_X; Florenciellales; Florenciellales_X; Florenciellales_X_sp.;	AB771842.1.1677_U	Stramenopiles-MAST	MAST-2	Eukaryota; Stramenopiles; Stramenopiles_X; MAST; MAST-2; MAST-2A; MAST-2A_X; MAST-2A_X_sp.;	0.704033	0.704033	0.704033	1	1	19	0	0.007	0.751071	0.00021	0.751071	0.00021	0	0.673054	0.001587	-0.705561	0.003295	4	0.055193	0.002849	0	0.010464	2e-06	15	49
Stramenopiles-Other_Stramenopiles-Pelagophytes	EU500162.1.816_U	Stramenopiles-Other	Florenciellales	Eukaryota; Stramenopiles; Ochrophyta; Dictyochophyceae; Dictyochophyceae_X; Florenciellales; Florenciellales_X; Florenciellales_X_sp.;	GU196150.1.1374_U	Stramenopiles-Pelagophytes	Pelagomonadaceae_clade_A	Eukaryota; Stramenopiles; Ochrophyta; Pelagophyceae; Pelagomonadales; Pelagomonadaceae; Pelagomonadaceae_clade_A; Pelagomonadaceae_clade_A_sp.;	0.622754	0.622754	0.622754	1	1	19	0	0.038	0.829992	1.1e-05	0.829992	1.1e-05	0	0.664925	0.001895	0.703012	0.007353	6	0.141376	0.000381	0	0.011786	2e-06	15	52
Stramenopiles-Other_Stramenopiles-Other	EU500162.1.816_U	Stramenopiles-Other	Florenciellales	Eukaryota; Stramenopiles; Ochrophyta; Dictyochophyceae; Dictyochophyceae_X; Florenciellales; Florenciellales_X; Florenciellales_X_sp.;	EU499990.1.824_U	Stramenopiles-Other	Triparma	Eukaryota; Stramenopiles; Ochrophyta; Bolidophyceae; Parmales; Triparmaceae; Triparma; Triparma_eleuthera;	-0.685642	-0.685642	-0.685642	1	1	19	0	0.013	-0.72084	0.000498	-0.72084	0.000498	0	-0.722223	0.000479	-0.722223	0.000479	0	0.078309	0.005037	1e-06	0.004659	1e-06	15	59
Stramenopiles-Other_Stramenopiles-MAST	EU500162.1.816_U	Stramenopiles-Other	Florenciellales	Eukaryota; Stramenopiles; Ochrophyta; Dictyochophyceae; Dictyochophyceae_X; Florenciellales; Florenciellales_X; Florenciellales_X_sp.;	GU823216.1.1365_U	Stramenopiles-MAST	MAST-3	Eukaryota; Stramenopiles; Stramenopiles_X; MAST; MAST-3; MAST-3I; MAST-3I_X; MAST-3I_X_sp.;	-0.685839	-0.685839	-0.685839	3	3	17	0	0.011	-0.519784	0.022545	0.672129	0.006055	-4	-0.568418	0.011107	0.640248	0.010138	-4	0.071521	0.063204	2e-06	0.040033	3e-06	15	61
Stramenopiles-Other_Alveolates-Dinoflagellates	EU500162.1.816_U	Stramenopiles-Other	Florenciellales	Eukaryota; Stramenopiles; Ochrophyta; Dictyochophyceae; Dictyochophyceae_X; Florenciellales; Florenciellales_X; Florenciellales_X_sp.;	GU825000.1.1197_U	Alveolates-Dinoflagellates	Dinophyceae	Eukaryota; Alveolata; Dinophyta; Dinophyceae; Dinophyceae_X; Dinophyceae_XX; Dinophyceae_XXX; Dinophyceae_XXX_sp.;	-0.728847	-0.728847	-0.728847	1	1	19	0	0.007	-0.748613	0.000227	-0.748613	0.000227	0	-0.736641	0.000322	-0.736641	0.000322	0	0.055193	0.003003	0	0.003586	0	15	64
Stramenopiles-Other_Alveolates-Dinoflagellates	EU500162.1.816_U	Stramenopiles-Other	Florenciellales	Eukaryota; Stramenopiles; Ochrophyta; Dictyochophyceae; Dictyochophyceae_X; Florenciellales; Florenciellales_X; Florenciellales_X_sp.;	HE611580.1.1746_U	Alveolates-Dinoflagellates	Gyrodinium	Eukaryota; Alveolata; Dinophyta; Dinophyceae; Dinophyceae_X; Dinophyceae_XX; Gyrodinium; Gyrodinium_sp.;	0.805657	0.805657	0.805657	1	1	19	0	0	0.782218	7.6e-05	0.782218	7.6e-05	0	0.829971	1.1e-05	0.829971	1.1e-05	0	0	0.001429	0	0.000421	0	15	65
Stramenopiles-Other_Alveolates-Dinoflagellates	EU500162.1.816_U	Stramenopiles-Other	Florenciellales	Eukaryota; Stramenopiles; Ochrophyta; Dictyochophyceae; Dictyochophyceae_X; Florenciellales; Florenciellales_X; Florenciellales_X_sp.;	HM581766.1.1782_U	Alveolates-Dinoflagellates	Prorocentrum	Eukaryota; Alveolata; Dinophyta; Dinophyceae; Dinophyceae_X; Dinophyceae_XX; Prorocentrum; Prorocentrum_sp.;	0.922535	0.922535	0.922535	2	2	18	0	0	0.941955	0	0.941955	0	0	0.934967	0	0.934967	0	0	0	2e-06	0	4e-06	0	15	66
Stramenopiles-Other_Alveolates-Ciliates	EU500162.1.816_U	Stramenopiles-Other	Florenciellales	Eukaryota; Stramenopiles; Ochrophyta; Dictyochophyceae; Dictyochophyceae_X; Florenciellales; Florenciellales_X; Florenciellales_X_sp.;	JX188331.1.1726_U	Alveolates-Ciliates	Oligohymenophorea	Eukaryota; Alveolata; Ciliophora; Oligohymenophorea; Scuticociliatia; Scuticociliatia-1; Scuticociliatia-1_X; Scuticociliatia-1_X_sp.;	-0.666374	-0.666374	-0.666374	2	2	18	0	0.018	-0.727306	0.000418	-0.727306	0.000418	0	-0.697684	0.000897	-0.697684	0.000897	0	0.094526	0.004532	1e-06	0.007199	1e-06	15	69
Stramenopiles-Other_Alveolates-Dinoflagellates	EU500162.1.816_U	Stramenopiles-Other	Florenciellales	Eukaryota; Stramenopiles; Ochrophyta; Dictyochophyceae; Dictyochophyceae_X; Florenciellales; Florenciellales_X; Florenciellales_X_sp.;	HM561067.1.974_U	Alveolates-Dinoflagellates	Dinophyceae	Eukaryota; Alveolata; Dinophyta; Dinophyceae; Dinophyceae_X; Dinophyceae_XX; Dinophyceae_XXX; Dinophyceae_XXX_sp.;	-0.771677	-0.771677	-0.771677	1	1	19	0	0.002	-0.778544	8.6e-05	-0.778544	8.6e-05	0	-0.758776	0.000166	-0.758776	0.000166	0	0.026563	0.001555	0	0.002357	0	15	71
Stramenopiles-Other_Alveolates-Ciliates	EU500162.1.816_U	Stramenopiles-Other	Florenciellales	Eukaryota; Stramenopiles; Ochrophyta; Dictyochophyceae; Dictyochophyceae_X; Florenciellales; Florenciellales_X; Florenciellales_X_sp.;	KF129779.1.1734_U	Alveolates-Ciliates	Spirotrichea	Eukaryota; Alveolata; Ciliophora; Spirotrichea; Strombidiida; Tontoniidae_A; Spirotontonia; Spirotontonia_sp.;	0.77917	0.77917	0.77917	4	1	16	3	0	-0.244474	0.313115	0.75941	0.000644	3	-0.203639	0.403046	0.873268	1e-05	3	0	0.320221	1e-06	0.397728	0	15	72
Stramenopiles-Other_Alveolates-Ciliates	EU500162.1.816_U	Stramenopiles-Other	Florenciellales	Eukaryota; Stramenopiles; Ochrophyta; Dictyochophyceae; Dictyochophyceae_X; Florenciellales; Florenciellales_X; Florenciellales_X_sp.;	AY665059.1.1720_U	Alveolates-Ciliates	Oligohymenophorea	Eukaryota; Alveolata; Ciliophora; Oligohymenophorea; Scuticociliatia; Scuticociliatia-1; Scuticociliatia-1_X; Scuticociliatia-1_X_sp.;	-0.80106	-0.80106	-0.80106	1	1	19	0	0.001	-0.831407	1e-05	-0.831407	1e-05	0	-0.815798	2.1e-05	-0.815798	2.1e-05	0	0.017494	0.000369	0	0.000604	0	15	77
Stramenopiles-Other_Rhizaria-Acantharia	EU500162.1.816_U	Stramenopiles-Other	Florenciellales	Eukaryota; Stramenopiles; Ochrophyta; Dictyochophyceae; Dictyochophyceae_X; Florenciellales; Florenciellales_X; Florenciellales_X_sp.;	HM561210.1.973_U	Rhizaria-Acantharia	Acantharea	Eukaryota; Rhizaria; Radiolaria; Acantharea; Acantharea_X; Acantharea_XX; Acantharea_XXX; Acantharea_XXX_sp.;	-0.843025	-0.843025	-0.843025	1	1	19	0	0	-0.875984	1e-06	-0.875984	1e-06	0	-0.845029	5e-06	-0.845029	5e-06	0	0	8.4e-05	0	0.000257	0	15	80
Stramenopiles-Other_Alveolates-Dinoflagellates	EU500162.1.816_U	Stramenopiles-Other	Florenciellales	Eukaryota; Stramenopiles; Ochrophyta; Dictyochophyceae; Dictyochophyceae_X; Florenciellales; Florenciellales_X; Florenciellales_X_sp.;	GU823932.1.1202_U	Alveolates-Dinoflagellates	Dinophyceae	Eukaryota; Alveolata; Dinophyta; Dinophyceae; Dinophyceae_X; Dinophyceae_XX; Dinophyceae_XXX; Dinophyceae_XXX_sp.;	-0.643286	-0.643286	-0.643286	5	1	14	4	0.042	0.537736	0.017565	-0.683185	0.004993	4	0.486716	0.034577	-0.791685	0.000437	4	0.148696	0.053123	2e-06	0.086673	1e-06	15	81
Stramenopiles-Other_Archaeplastids-Chlorophytes	EU500162.1.816_U	Stramenopiles-Other	Florenciellales	Eukaryota; Stramenopiles; Ochrophyta; Dictyochophyceae; Dictyochophyceae_X; Florenciellales; Florenciellales_X; Florenciellales_X_sp.;	EU143529.1.906_U	Archaeplastids-Chlorophytes	Pyramimonadales	Eukaryota; Archaeplastida; Chlorophyta; Pyramimonadales; Pyramimonadales_X; Pyramimonadales_XX; Pterosperma; Pterosperma_sp.;	0.878841	0.878841	0.878841	1	1	19	0	0	0.854364	3e-06	0.854364	3e-06	0	0.918065	0	0.918065	0	0	0	0.000175	0	1.2e-05	0	15	84
Stramenopiles-Other_Alveolates-Ciliates	EU500162.1.816_U	Stramenopiles-Other	Florenciellales	Eukaryota; Stramenopiles; Ochrophyta; Dictyochophyceae; Dictyochophyceae_X; Florenciellales; Florenciellales_X; Florenciellales_X_sp.;	KJ759492.1.1752_U	Alveolates-Ciliates	Phyllopharyngea	Eukaryota; Alveolata; Ciliophora; Phyllopharyngea; Cyrtophoria; Chlamydodontidae; Chlamydodon; Chlamydodon_sp.;	-0.782192	-0.782192	-0.782192	1	1	19	0	0	-0.672548	0.001605	-0.672548	0.001605	0	-0.760546	0.000157	-0.760546	0.000157	0	0	0.011185	1e-06	0.002263	0	15	93
Stramenopiles-Other_Alveolates-Dinoflagellates	EU500162.1.816_U	Stramenopiles-Other	Florenciellales	Eukaryota; Stramenopiles; Ochrophyta; Dictyochophyceae; Dictyochophyceae_X; Florenciellales; Florenciellales_X; Florenciellales_X_sp.;	EU793087.1.924_U	Alveolates-Dinoflagellates	Dinophyceae	Eukaryota; Alveolata; Dinophyta; Dinophyceae; Dinophyceae_X; Dinophyceae_XX; Dinophyceae_XXX; Dinophyceae_XXX_sp.;	0.751137	0.751137	0.751137	1	1	19	0	0.002	0.703056	0.000786	0.703056	0.000786	0	0.772942	0.000104	0.772942	0.000104	0	0.026563	0.006834	1e-06	0.001732	0	15	97
Stramenopiles-Other_Alveolates-Syndiniales	EU500162.1.816_U	Stramenopiles-Other	Florenciellales	Eukaryota; Stramenopiles; Ochrophyta; Dictyochophyceae; Dictyochophyceae_X; Florenciellales; Florenciellales_X; Florenciellales_X_sp.;	EU793278.1.1575_U	Alveolates-Syndiniales	Dino-Group-II	Eukaryota; Alveolata; Dinophyta; Syndiniales; Dino-Group-II; Dino-Group-II-Clade-6; Dino-Group-II-Clade-6_X; Dino-Group-II-Clade-6_X_sp.;	-0.604989	-0.604989	-0.604989	1	1	17	0	0.043	-0.698383	0.000882	-0.698383	0.000882	0	-0.62629	0.004119	-0.62629	0.004119	0	0.150291	0.007377	1e-06	0.019929	2e-06	15	109
Stramenopiles-Other_Alveolates-Dinoflagellates	EU500162.1.816_U	Stramenopiles-Other	Florenciellales	Eukaryota; Stramenopiles; Ochrophyta; Dictyochophyceae; Dictyochophyceae_X; Florenciellales; Florenciellales_X; Florenciellales_X_sp.;	AY664921.1.1754_U	Alveolates-Dinoflagellates	Prorocentrum	Eukaryota; Alveolata; Dinophyta; Dinophyceae; Dinophyceae_X; Dinophyceae_XX; Prorocentrum; Prorocentrum_sp.;	0.785776	0.785776	0.785776	2	2	18	0	0	0.692236	0.001022	0.692236	0.001022	0	0.796311	4.5e-05	0.796311	4.5e-05	0	0	0.00819	1e-06	0.001009	0	15	111
Stramenopiles-Other_Alveolates-Ciliates	EU500162.1.816_U	Stramenopiles-Other	Florenciellales	Eukaryota; Stramenopiles; Ochrophyta; Dictyochophyceae; Dictyochophyceae_X; Florenciellales; Florenciellales_X; Florenciellales_X_sp.;	DQ120009.1.1729_U	Alveolates-Ciliates	Litostomatea	Eukaryota; Alveolata; Ciliophora; Litostomatea; Cyclotrichia; Cyclotrichia_X; Cyclotrichia_XX; Cyclotrichia_XX_sp.;	-0.864906	-0.864906	-0.864906	1	1	19	0	0	-0.85885	3e-06	-0.85885	3e-06	0	-0.886271	0	-0.886271	0	0	0	0.00015	0	6.9e-05	0	15	113
Stramenopiles-Other_Alveolates-Dinoflagellates	EU500162.1.816_U	Stramenopiles-Other	Florenciellales	Eukaryota; Stramenopiles; Ochrophyta; Dictyochophyceae; Dictyochophyceae_X; Florenciellales; Florenciellales_X; Florenciellales_X_sp.;	FN690221.1.1692_U	Alveolates-Dinoflagellates	Dinophyceae	Eukaryota; Alveolata; Dinophyta; Dinophyceae; Dinophyceae_X; Dinophyceae_XX; Dinophyceae_XXX; Dinophyceae_XXX_sp.;	0.686561	0.686561	0.686561	1	1	19	0	0.007	0.720449	0.000503	0.720449	0.000503	0	0.741953	0.000276	0.741953	0.000276	0	0.055193	0.005066	1e-06	0.003273	0	15	118
Stramenopiles-Other_Alveolates-Ciliates	EU500162.1.816_U	Stramenopiles-Other	Florenciellales	Eukaryota; Stramenopiles; Ochrophyta; Dictyochophyceae; Dictyochophyceae_X; Florenciellales; Florenciellales_X; Florenciellales_X_sp.;	KJ759417.1.1743_U	Alveolates-Ciliates	Spirotrichea	Eukaryota; Alveolata; Ciliophora; Spirotrichea; Choreotrichida; Leegaardiellidae_B; Leegaardiella; Leegaardiella_sp.;	0.642808	0.642808	0.642808	4	1	12	3	0.029	-0.264677	0.273494	0.64592	0.005094	2	-0.361145	0.128729	0.658772	0.005516	3	0.123397	0.297343	2e-06	0.201708	2e-06	15	124
Stramenopiles-Other_Alveolates-Ciliates	EU500162.1.816_U	Stramenopiles-Other	Florenciellales	Eukaryota; Stramenopiles; Ochrophyta; Dictyochophyceae; Dictyochophyceae_X; Florenciellales; Florenciellales_X; Florenciellales_X_sp.;	KC582955.1.1774_U	Alveolates-Ciliates	Spirotrichea	Eukaryota; Alveolata; Ciliophora; Spirotrichea; Strombidiida; Strombidiida_X; Strombidiida_XX; Strombidiida_XX_sp.;	-0.730022	-0.730022	-0.730022	1	1	19	0	0	-0.84629	5e-06	-0.84629	5e-06	0	-0.799503	4e-05	-0.799503	4e-05	0	0	0.000228	0	0.000938	0	15	125
Stramenopiles-Other_Haptophytes	EU500162.1.816_U	Stramenopiles-Other	Florenciellales	Eukaryota; Stramenopiles; Ochrophyta; Dictyochophyceae; Dictyochophyceae_X; Florenciellales; Florenciellales_X; Florenciellales_X_sp.;	HG970975	Haptophytes	Haptophyta	Eukaryota; Hacrobia; Haptophyta; Haptophyta_X; Haptophyta_XX; Haptophyta_XXX; Haptophyta_XXXX; Haptophyta_XXXX_sp.;	0.707286	0.707286	0.707286	1	1	19	0	0.004	0.757179	0.000174	0.757179	0.000174	0	0.767966	0.000123	0.767966	0.000123	0	0.040295	0.002502	0	0.001935	0	15	126
Stramenopiles-Other_Alveolates-Syndiniales	EU500162.1.816_U	Stramenopiles-Other	Florenciellales	Eukaryota; Stramenopiles; Ochrophyta; Dictyochophyceae; Dictyochophyceae_X; Florenciellales; Florenciellales_X; Florenciellales_X_sp.;	HQ870498.1.849_U	Alveolates-Syndiniales	Dino-Group-III	Eukaryota; Alveolata; Dinophyta; Syndiniales; Dino-Group-III; Dino-Group-III_X; Dino-Group-III_XX; Dino-Group-III_XX_sp.;	0.667556	0.667556	0.667556	3	3	16	0	0.017	0.626691	0.004088	-0.660416	0.007367	-4	0.635051	0.003485	-0.725661	0.002196	-4	0.091523	0.020847	2e-06	0.017853	1e-06	15	132
Stramenopiles-Other_Alveolates-Syndiniales	EU500162.1.816_U	Stramenopiles-Other	Florenciellales	Eukaryota; Stramenopiles; Ochrophyta; Dictyochophyceae; Dictyochophyceae_X; Florenciellales; Florenciellales_X; Florenciellales_X_sp.;	GU824677.1.1204_U	Alveolates-Syndiniales	Dino-Group-II	Eukaryota; Alveolata; Dinophyta; Syndiniales; Dino-Group-II; Dino-Group-II-Clade-10-and-11; Dino-Group-II-Clade-10-and-11_X; Dino-Group-II-Clade-10-and-11_X_sp.;	-0.677114	-0.677114	-0.677114	1	1	19	0	0.016	-0.671094	0.001658	-0.671094	0.001658	0	-0.676143	0.001482	-0.676143	0.001482	0	0.088365	0.011427	1e-06	0.010018	1e-06	15	135
Stramenopiles-Other_Stramenopiles-Diatoms	EU500162.1.816_U	Stramenopiles-Other	Florenciellales	Eukaryota; Stramenopiles; Ochrophyta; Dictyochophyceae; Dictyochophyceae_X; Florenciellales; Florenciellales_X; Florenciellales_X_sp.;	GU822947.1.1074_U	Stramenopiles-Diatoms	Haslea	Eukaryota; Stramenopiles; Ochrophyta; Bacillariophyta; Bacillariophyta_X; Raphid-pennate; Haslea; Haslea_sp.;	-0.728048	-0.728048	-0.728048	2	2	18	0	0.003	-0.698504	0.000879	-0.698504	0.000879	0	-0.68589	0.001187	-0.68589	0.001187	0	0.033974	0.007364	1e-06	0.008659	1e-06	15	139
Stramenopiles-Other_Stramenopiles-Chrysophytes	EU500162.1.816_U	Stramenopiles-Other	Florenciellales	Eukaryota; Stramenopiles; Ochrophyta; Dictyochophyceae; Dictyochophyceae_X; Florenciellales; Florenciellales_X; Florenciellales_X_sp.;	KC582997.1.1775_U	Stramenopiles-Chrysophytes	Chrysophyceae_Clade-I	Eukaryota; Stramenopiles; Ochrophyta; Chrysophyceae; Chrysophyceae_X; Chrysophyceae_Clade-I; Chrysophyceae_Clade-I_X; Chrysophyceae_Clade-I_X_sp.;	-0.732356	-0.732356	-0.732356	1	1	19	0	0.002	-0.821343	1.6e-05	-0.821343	1.6e-05	0	-0.773961	0.000101	-0.773961	0.000101	0	0.026563	0.000497	0	0.001705	0	15	142
Stramenopiles-Other_Stramenopiles-Diatoms	EU500162.1.816_U	Stramenopiles-Other	Florenciellales	Eukaryota; Stramenopiles; Ochrophyta; Dictyochophyceae; Dictyochophyceae_X; Florenciellales; Florenciellales_X; Florenciellales_X_sp.;	EU499988.1.803_U	Stramenopiles-Diatoms	Raphid-pennate	Eukaryota; Stramenopiles; Ochrophyta; Bacillariophyta; Bacillariophyta_X; Raphid-pennate; Raphid-pennate_X; Raphid-pennate_X_sp.;	-0.704151	-0.704151	-0.704151	1	1	19	0	0.006	-0.810632	2.6e-05	-0.810632	2.6e-05	0	-0.741068	0.000283	-0.741068	0.000283	0	0.050667	0.000667	0	0.003318	0	15	145
Stramenopiles-Other_Stramenopiles-MAST	EU500162.1.816_U	Stramenopiles-Other	Florenciellales	Eukaryota; Stramenopiles; Ochrophyta; Dictyochophyceae; Dictyochophyceae_X; Florenciellales; Florenciellales_X; Florenciellales_X_sp.;	AJ402350.1.1758_U	Stramenopiles-MAST	MAST-1	Eukaryota; Stramenopiles; Stramenopiles_X; MAST; MAST-1; MAST-1D; MAST-1D_X; MAST-1D_X_sp.;	0.713452	0.713452	0.713452	1	1	19	0	0.004	0.815204	2.1e-05	0.815204	2.1e-05	0	0.758223	0.000169	0.758223	0.000169	0	0.040295	0.000589	0	0.002374	0	15	150
Stramenopiles-Other_is2PM	EU500162.1.816_U	Stramenopiles-Other	Florenciellales	Eukaryota; Stramenopiles; Ochrophyta; Dictyochophyceae; Dictyochophyceae_X; Florenciellales; Florenciellales_X; Florenciellales_X_sp.;	is2PM	is2PM	NA	NA	0.61233	0.61233	0.61233	1	1	18	0	0.049	0.448259	0.054251	0.591041	0.033401	-6	0.585166	0.00849	0.636474	0.019339	-6	0.160556	0.111225	5e-06	0.032958	4e-06	15	213
Stramenopiles-Chrysophytes_Stramenopiles-Chrysophytes	AY129065.1.1781_U	Stramenopiles-Chrysophytes	Chrysophyceae_Clade-H	Eukaryota; Stramenopiles; Ochrophyta; Chrysophyceae; Chrysophyceae_X; Chrysophyceae_Clade-H; Chrysophyceae_Clade-H_X; Chrysophyceae_Clade-H_X_sp.;	KC583138.1.1098_U	Stramenopiles-Chrysophytes	Chrysophyceae_Clade-H	Eukaryota; Stramenopiles; Ochrophyta; Chrysophyceae; Chrysophyceae_X; Chrysophyceae_Clade-H; Chrysophyceae_Clade-H_X; Chrysophyceae_Clade-H_X_sp.;	0.768564	0.768564	0.768564	3	3	17	0	0.002	0.754138	0.000192	0.754138	0.000192	0	0.713658	0.000601	0.713658	0.000601	0	0.026563	0.002671	0	0.005433	1e-06	16	20
Stramenopiles-Chrysophytes_Alveolates-Dinoflagellates	AY129065.1.1781_U	Stramenopiles-Chrysophytes	Chrysophyceae_Clade-H	Eukaryota; Stramenopiles; Ochrophyta; Chrysophyceae; Chrysophyceae_X; Chrysophyceae_Clade-H; Chrysophyceae_Clade-H_X; Chrysophyceae_Clade-H_X_sp.;	EU087269.1.895_U	Alveolates-Dinoflagellates	Pfiesteriaceae	Eukaryota; Alveolata; Dinophyta; Dinophyceae; Dinophyceae_X; Pfiesteriaceae; Pfiesteriaceae_X; Pfiesteriaceae_X_sp.;	-0.636376	-0.636376	-0.636376	1	1	18	0	0.037	-0.640804	0.003115	-0.640804	0.003115	0	-0.714348	0.00059	-0.714348	0.00059	0	0.139515	0.017354	2e-06	0.005381	1e-06	16	22
Stramenopiles-Chrysophytes_Alveolates-Syndiniales	AY129065.1.1781_U	Stramenopiles-Chrysophytes	Chrysophyceae_Clade-H	Eukaryota; Stramenopiles; Ochrophyta; Chrysophyceae; Chrysophyceae_X; Chrysophyceae_Clade-H; Chrysophyceae_Clade-H_X; Chrysophyceae_Clade-H_X_sp.;	FJ431723.1.830_U	Alveolates-Syndiniales	Dino-Group-III	Eukaryota; Alveolata; Dinophyta; Syndiniales; Dino-Group-III; Dino-Group-III_X; Dino-Group-III_XX; Dino-Group-III_XX_sp.;	-0.615895	-0.615895	-0.615895	3	3	13	0	0.042	-0.652196	0.002476	-0.652196	0.002476	0	-0.612818	0.005276	-0.612818	0.005276	0	0.148696	0.01492	1e-06	0.023709	2e-06	16	27
Stramenopiles-Chrysophytes_Alveolates-Dinoflagellates	AY129065.1.1781_U	Stramenopiles-Chrysophytes	Chrysophyceae_Clade-H	Eukaryota; Stramenopiles; Ochrophyta; Chrysophyceae; Chrysophyceae_X; Chrysophyceae_Clade-H; Chrysophyceae_Clade-H_X; Chrysophyceae_Clade-H_X_sp.;	GU825315.1.1202_U	Alveolates-Dinoflagellates	Dinophyceae	Eukaryota; Alveolata; Dinophyta; Dinophyceae; Dinophyceae_X; Dinophyceae_XX; Dinophyceae_XXX; Dinophyceae_XXX_sp.;	-0.663197	-0.663197	-0.663197	2	2	18	0	0.015	-0.723134	0.000468	-0.723134	0.000468	0	-0.704695	0.000755	-0.704695	0.000755	0	0.085181	0.004881	1e-06	0.006365	1e-06	16	32
Stramenopiles-Chrysophytes_Alveolates-Ciliates	AY129065.1.1781_U	Stramenopiles-Chrysophytes	Chrysophyceae_Clade-H	Eukaryota; Stramenopiles; Ochrophyta; Chrysophyceae; Chrysophyceae_X; Chrysophyceae_Clade-H; Chrysophyceae_Clade-H_X; Chrysophyceae_Clade-H_X_sp.;	KY290313.1.1621_U	Alveolates-Ciliates	Spirotrichea	Eukaryota; Alveolata; Ciliophora; Spirotrichea; Choreotrichida; Leegaardiellidae_B; Leegaardiella; Leegaardiella_sp.;	0.743812	0.743812	0.743812	2	2	18	0	0.002	0.729607	0.000392	0.729607	0.000392	0	0.793937	4.9e-05	0.793937	4.9e-05	0	0.026563	0.004366	1e-06	0.001055	0	16	36
Stramenopiles-Chrysophytes_Stramenopiles-MAST	AY129065.1.1781_U	Stramenopiles-Chrysophytes	Chrysophyceae_Clade-H	Eukaryota; Stramenopiles; Ochrophyta; Chrysophyceae; Chrysophyceae_X; Chrysophyceae_Clade-H; Chrysophyceae_Clade-H_X; Chrysophyceae_Clade-H_X_sp.;	JQ782004.1.1784_U	Stramenopiles-MAST	MAST-1	Eukaryota; Stramenopiles; Stramenopiles_X; MAST; MAST-1; MAST-1C; MAST-1C_X; MAST-1C_X_sp.;	-0.689191	-0.689191	-0.689191	3	3	16	0	0.006	-0.698073	0.000888	-0.698073	0.000888	0	-0.631533	0.003729	-0.631533	0.003729	0	0.050667	0.007413	1e-06	0.01866	2e-06	16	37
Stramenopiles-Chrysophytes_Stramenopiles-MAST	AY129065.1.1781_U	Stramenopiles-Chrysophytes	Chrysophyceae_Clade-H	Eukaryota; Stramenopiles; Ochrophyta; Chrysophyceae; Chrysophyceae_X; Chrysophyceae_Clade-H; Chrysophyceae_Clade-H_X; Chrysophyceae_Clade-H_X_sp.;	KF129967.1.1739_U	Stramenopiles-MAST	MAST-9	Eukaryota; Stramenopiles; Stramenopiles_X; MAST; MAST-9; MAST-9A; MAST-9A_X; MAST-9A_X_sp.;	0.705606	0.705606	0.705606	3	3	16	0	0.009	0.749047	0.000224	0.749047	0.000224	0	0.72432	0.000453	0.72432	0.000453	0	0.063892	0.002979	0	0.004468	1e-06	16	38
Stramenopiles-Chrysophytes_Alveolates-Dinoflagellates	AY129065.1.1781_U	Stramenopiles-Chrysophytes	Chrysophyceae_Clade-H	Eukaryota; Stramenopiles; Ochrophyta; Chrysophyceae; Chrysophyceae_X; Chrysophyceae_Clade-H; Chrysophyceae_Clade-H_X; Chrysophyceae_Clade-H_X_sp.;	KF129831.1.1758_U	Alveolates-Dinoflagellates	Dinophyceae	Eukaryota; Alveolata; Dinophyta; Dinophyceae; Dinophyceae_X; Dinophyceae_XX; Dinophyceae_XXX; Dinophyceae_XXX_sp.;	-0.627754	-0.627754	-0.627754	2	2	18	0	0.039	-0.657169	0.002234	-0.657169	0.002234	0	-0.668522	0.001753	-0.668522	0.001753	0	0.143381	0.014022	1e-06	0.0112	1e-06	16	40
Stramenopiles-Chrysophytes_Alveolates-Ciliates	AY129065.1.1781_U	Stramenopiles-Chrysophytes	Chrysophyceae_Clade-H	Eukaryota; Stramenopiles; Ochrophyta; Chrysophyceae; Chrysophyceae_X; Chrysophyceae_Clade-H; Chrysophyceae_Clade-H_X; Chrysophyceae_Clade-H_X_sp.;	KF130183.1.1714_U	Alveolates-Ciliates	Colpodea	Eukaryota; Alveolata; Ciliophora; Colpodea; Colpodea-1; Colpodea-1_X; Colpodea-1_XX; Colpodea-1_XX_sp.;	-0.620489	-0.620489	-0.620489	3	8	12	-5	0.043	0.218933	0.367846	0.819748	0.000332	5	0.221049	0.363118	0.826713	0.000266	5	0.150291	0.350369	0	0.375272	0	16	48
Stramenopiles-Chrysophytes_Stramenopiles-Pelagophytes	AY129065.1.1781_U	Stramenopiles-Chrysophytes	Chrysophyceae_Clade-H	Eukaryota; Stramenopiles; Ochrophyta; Chrysophyceae; Chrysophyceae_X; Chrysophyceae_Clade-H; Chrysophyceae_Clade-H_X; Chrysophyceae_Clade-H_X_sp.;	GU196150.1.1374_U	Stramenopiles-Pelagophytes	Pelagomonadaceae_clade_A	Eukaryota; Stramenopiles; Ochrophyta; Pelagophyceae; Pelagomonadales; Pelagomonadaceae; Pelagomonadaceae_clade_A; Pelagomonadaceae_clade_A_sp.;	-0.640896	-0.640896	-0.640896	3	2	14	1	0.035	-0.614555	0.005114	-0.642217	0.004056	1	-0.554629	0.013719	-0.6381	0.004379	1	0.135676	0.023987	2e-06	0.046512	2e-06	16	52
Stramenopiles-Chrysophytes_Stramenopiles-Other	AY129065.1.1781_U	Stramenopiles-Chrysophytes	Chrysophyceae_Clade-H	Eukaryota; Stramenopiles; Ochrophyta; Chrysophyceae; Chrysophyceae_X; Chrysophyceae_Clade-H; Chrysophyceae_Clade-H_X; Chrysophyceae_Clade-H_X_sp.;	EU499990.1.824_U	Stramenopiles-Other	Triparma	Eukaryota; Stramenopiles; Ochrophyta; Bolidophyceae; Parmales; Triparmaceae; Triparma; Triparma_eleuthera;	0.698727	0.698727	0.698727	3	3	16	0	0.01	0.684394	0.001229	0.684394	0.001229	0	0.677646	0.001433	0.677646	0.001433	0	0.067958	0.009316	1e-06	0.009784	1e-06	16	59
Stramenopiles-Chrysophytes_Stramenopiles-Other	AY129065.1.1781_U	Stramenopiles-Chrysophytes	Chrysophyceae_Clade-H	Eukaryota; Stramenopiles; Ochrophyta; Chrysophyceae; Chrysophyceae_X; Chrysophyceae_Clade-H; Chrysophyceae_Clade-H_X; Chrysophyceae_Clade-H_X_sp.;	EF695122.1.814_U	Stramenopiles-Other	MOCH-2	Eukaryota; Stramenopiles; Stramenopiles_X; MOCH; MOCH-2; MOCH-2_X; MOCH-2_XX; MOCH-2_XX_sp.;	0.72553	0.72553	0.72553	3	3	16	0	0.002	0.694298	0.000973	0.694298	0.000973	0	0.725396	0.00044	0.725396	0.00044	0	0.026563	0.007874	1e-06	0.004389	1e-06	16	60
Stramenopiles-Chrysophytes_Stramenopiles-MAST	AY129065.1.1781_U	Stramenopiles-Chrysophytes	Chrysophyceae_Clade-H	Eukaryota; Stramenopiles; Ochrophyta; Chrysophyceae; Chrysophyceae_X; Chrysophyceae_Clade-H; Chrysophyceae_Clade-H_X; Chrysophyceae_Clade-H_X_sp.;	AJ402357.1.1758_U	Stramenopiles-MAST	MAST-3	Eukaryota; Stramenopiles; Stramenopiles_X; MAST; MAST-3; MAST-3A; MAST-3A_X; MAST-3A_X_sp.;	0.73995	0.73995	0.73995	1	1	18	0	0.003	0.771	0.000111	0.771	0.000111	0	0.796313	4.5e-05	0.796313	4.5e-05	0	0.033974	0.001873	0	0.001009	0	16	63
Stramenopiles-Chrysophytes_Alveolates-Dinoflagellates	AY129065.1.1781_U	Stramenopiles-Chrysophytes	Chrysophyceae_Clade-H	Eukaryota; Stramenopiles; Ochrophyta; Chrysophyceae; Chrysophyceae_X; Chrysophyceae_Clade-H; Chrysophyceae_Clade-H_X; Chrysophyceae_Clade-H_X_sp.;	HE611580.1.1746_U	Alveolates-Dinoflagellates	Gyrodinium	Eukaryota; Alveolata; Dinophyta; Dinophyceae; Dinophyceae_X; Dinophyceae_XX; Gyrodinium; Gyrodinium_sp.;	-0.711534	-0.711534	-0.711534	1	1	18	0	0.008	-0.725254	0.000442	-0.725254	0.000442	0	-0.712028	0.000627	-0.712028	0.000627	0	0.059414	0.004714	1e-06	0.00557	1e-06	16	65
Stramenopiles-Chrysophytes_Alveolates-Dinoflagellates	AY129065.1.1781_U	Stramenopiles-Chrysophytes	Chrysophyceae_Clade-H	Eukaryota; Stramenopiles; Ochrophyta; Chrysophyceae; Chrysophyceae_X; Chrysophyceae_Clade-H; Chrysophyceae_Clade-H_X; Chrysophyceae_Clade-H_X_sp.;	EU500118.1.810_U	Alveolates-Dinoflagellates	Gymnodinium	Eukaryota; Alveolata; Dinophyta; Dinophyceae; Dinophyceae_X; Dinophyceae_XX; Gymnodinium; Gymnodinium_sp.;	-0.662446	-0.662446	-0.662446	2	1	14	1	0.025	-0.388366	0.100349	-0.504203	0.032871	1	-0.346356	0.14632	-0.661157	0.002811	1	0.113584	0.162093	5e-06	0.219231	1e-06	16	67
Stramenopiles-Chrysophytes_Alveolates-Ciliates	AY129065.1.1781_U	Stramenopiles-Chrysophytes	Chrysophyceae_Clade-H	Eukaryota; Stramenopiles; Ochrophyta; Chrysophyceae; Chrysophyceae_X; Chrysophyceae_Clade-H; Chrysophyceae_Clade-H_X; Chrysophyceae_Clade-H_X_sp.;	JX188331.1.1726_U	Alveolates-Ciliates	Oligohymenophorea	Eukaryota; Alveolata; Ciliophora; Oligohymenophorea; Scuticociliatia; Scuticociliatia-1; Scuticociliatia-1_X; Scuticociliatia-1_X_sp.;	0.739347	0.739347	0.739347	3	3	16	0	0.005	0.74792	0.000231	0.74792	0.000231	0	0.722247	0.000479	0.722247	0.000479	0	0.0456	0.00304	0	0.004659	1e-06	16	69
Stramenopiles-Chrysophytes_Alveolates-Ciliates	AY129065.1.1781_U	Stramenopiles-Chrysophytes	Chrysophyceae_Clade-H	Eukaryota; Stramenopiles; Ochrophyta; Chrysophyceae; Chrysophyceae_X; Chrysophyceae_Clade-H; Chrysophyceae_Clade-H_X; Chrysophyceae_Clade-H_X_sp.;	AY665059.1.1720_U	Alveolates-Ciliates	Oligohymenophorea	Eukaryota; Alveolata; Ciliophora; Oligohymenophorea; Scuticociliatia; Scuticociliatia-1; Scuticociliatia-1_X; Scuticociliatia-1_X_sp.;	0.690567	0.690567	0.690567	3	3	16	0	0.006	0.762197	0.000149	0.762197	0.000149	0	0.705882	0.000733	0.705882	0.000733	0	0.050667	0.002263	0	0.006242	1e-06	16	77
Stramenopiles-Chrysophytes_Rhizaria-Acantharia	AY129065.1.1781_U	Stramenopiles-Chrysophytes	Chrysophyceae_Clade-H	Eukaryota; Stramenopiles; Ochrophyta; Chrysophyceae; Chrysophyceae_X; Chrysophyceae_Clade-H; Chrysophyceae_Clade-H_X; Chrysophyceae_Clade-H_X_sp.;	HM561210.1.973_U	Rhizaria-Acantharia	Acantharea	Eukaryota; Rhizaria; Radiolaria; Acantharea; Acantharea_X; Acantharea_XX; Acantharea_XXX; Acantharea_XXX_sp.;	0.679294	0.679294	0.679294	3	3	16	0	0.016	0.708018	0.000694	0.708018	0.000694	0	0.694469	0.000969	0.694469	0.000969	0	0.088365	0.006317	1e-06	0.007521	1e-06	16	80
Stramenopiles-Chrysophytes_Alveolates-Dinoflagellates	AY129065.1.1781_U	Stramenopiles-Chrysophytes	Chrysophyceae_Clade-H	Eukaryota; Stramenopiles; Ochrophyta; Chrysophyceae; Chrysophyceae_X; Chrysophyceae_Clade-H; Chrysophyceae_Clade-H_X; Chrysophyceae_Clade-H_X_sp.;	GU822346.1.1073_U	Alveolates-Dinoflagellates	Protoperidinium	Eukaryota; Alveolata; Dinophyta; Dinophyceae; Dinophyceae_X; Dinophyceae_XX; Protoperidinium; Protoperidinium_sp.;	0.617604	0.617604	0.617604	1	5	15	-4	0.042	0.413355	0.078559	0.714363	0.00277	-4	0.490781	0.032875	0.710714	0.002979	-4	0.148696	0.139672	2e-06	0.083888	2e-06	16	95
Stramenopiles-Chrysophytes_Alveolates-Dinoflagellates	AY129065.1.1781_U	Stramenopiles-Chrysophytes	Chrysophyceae_Clade-H	Eukaryota; Stramenopiles; Ochrophyta; Chrysophyceae; Chrysophyceae_X; Chrysophyceae_Clade-H; Chrysophyceae_Clade-H_X; Chrysophyceae_Clade-H_X_sp.;	EU793087.1.924_U	Alveolates-Dinoflagellates	Dinophyceae	Eukaryota; Alveolata; Dinophyta; Dinophyceae; Dinophyceae_X; Dinophyceae_XX; Dinophyceae_XXX; Dinophyceae_XXX_sp.;	-0.722745	-0.722745	-0.722745	1	1	18	0	0.006	-0.704618	0.000756	-0.704618	0.000756	0	-0.732778	0.000359	-0.732778	0.000359	0	0.050667	0.006721	1e-06	0.003847	0	16	97
Stramenopiles-Chrysophytes_Alveolates-Syndiniales	AY129065.1.1781_U	Stramenopiles-Chrysophytes	Chrysophyceae_Clade-H	Eukaryota; Stramenopiles; Ochrophyta; Chrysophyceae; Chrysophyceae_X; Chrysophyceae_Clade-H; Chrysophyceae_Clade-H_X; Chrysophyceae_Clade-H_X_sp.;	EU780604.1.1660_U	Alveolates-Syndiniales	Dino-Group-III	Eukaryota; Alveolata; Dinophyta; Syndiniales; Dino-Group-III; Dino-Group-III_X; Dino-Group-III_XX; Dino-Group-III_XX_sp.;	-0.638038	-0.638038	-0.638038	2	2	14	0	0.033	-0.700563	0.000836	-0.700563	0.000836	0	-0.697103	0.00091	-0.697103	0.00091	0	0.131118	0.007089	1e-06	0.007254	1e-06	16	103
Stramenopiles-Chrysophytes_Alveolates-Syndiniales	AY129065.1.1781_U	Stramenopiles-Chrysophytes	Chrysophyceae_Clade-H	Eukaryota; Stramenopiles; Ochrophyta; Chrysophyceae; Chrysophyceae_X; Chrysophyceae_Clade-H; Chrysophyceae_Clade-H_X; Chrysophyceae_Clade-H_X_sp.;	GU820270.1.1197_U	Alveolates-Syndiniales	Dino-Group-I	Eukaryota; Alveolata; Dinophyta; Syndiniales; Dino-Group-I; Dino-Group-I-Clade-6; Dino-Group-I-Clade-6_X; Dino-Group-I-Clade-6_X_sp.;	-0.637718	-0.637718	-0.637718	3	2	16	1	0.036	-0.527028	0.020417	-0.630296	0.005048	1	-0.397892	0.091581	-0.581498	0.02917	5	0.137718	0.058727	2e-06	0.162688	5e-06	16	104
Stramenopiles-Chrysophytes_Stramenopiles-MAST	AY129065.1.1781_U	Stramenopiles-Chrysophytes	Chrysophyceae_Clade-H	Eukaryota; Stramenopiles; Ochrophyta; Chrysophyceae; Chrysophyceae_X; Chrysophyceae_Clade-H; Chrysophyceae_Clade-H_X; Chrysophyceae_Clade-H_X_sp.;	EU499985.1.853_U	Stramenopiles-MAST	MAST-7	Eukaryota; Stramenopiles; Stramenopiles_X; MAST; MAST-7; MAST-7B; MAST-7B_X; MAST-7B_X_sp.;	-0.71386	-0.71386	-0.71386	2	1	17	1	0.007	-0.608726	0.005676	-0.650827	0.003444	1	-0.517771	0.023167	-0.74445	0.000395	1	0.055193	0.025622	2e-06	0.06587	0	16	110
Stramenopiles-Chrysophytes_Alveolates-Dinoflagellates	AY129065.1.1781_U	Stramenopiles-Chrysophytes	Chrysophyceae_Clade-H	Eukaryota; Stramenopiles; Ochrophyta; Chrysophyceae; Chrysophyceae_X; Chrysophyceae_Clade-H; Chrysophyceae_Clade-H_X; Chrysophyceae_Clade-H_X_sp.;	AY664921.1.1754_U	Alveolates-Dinoflagellates	Prorocentrum	Eukaryota; Alveolata; Dinophyta; Dinophyceae; Dinophyceae_X; Dinophyceae_XX; Prorocentrum; Prorocentrum_sp.;	-0.737353	-0.737353	-0.737353	3	3	16	0	0.003	-0.591386	0.007656	-0.591386	0.007656	0	-0.693591	0.00099	-0.693591	0.00099	0	0.033974	0.031262	2e-06	0.007622	1e-06	16	111
Stramenopiles-Chrysophytes_Alveolates-Ciliates	AY129065.1.1781_U	Stramenopiles-Chrysophytes	Chrysophyceae_Clade-H	Eukaryota; Stramenopiles; Ochrophyta; Chrysophyceae; Chrysophyceae_X; Chrysophyceae_Clade-H; Chrysophyceae_Clade-H_X; Chrysophyceae_Clade-H_X_sp.;	DQ120009.1.1729_U	Alveolates-Ciliates	Litostomatea	Eukaryota; Alveolata; Ciliophora; Litostomatea; Cyclotrichia; Cyclotrichia_X; Cyclotrichia_XX; Cyclotrichia_XX_sp.;	0.708625	0.708625	0.708625	3	3	16	0	0.007	0.698751	0.000874	0.698751	0.000874	0	0.661694	0.002031	0.661694	0.002031	0	0.055193	0.007338	1e-06	0.012432	1e-06	16	113
Stramenopiles-Chrysophytes_Alveolates-Dinoflagellates	AY129065.1.1781_U	Stramenopiles-Chrysophytes	Chrysophyceae_Clade-H	Eukaryota; Stramenopiles; Ochrophyta; Chrysophyceae; Chrysophyceae_X; Chrysophyceae_Clade-H; Chrysophyceae_Clade-H_X; Chrysophyceae_Clade-H_X_sp.;	FN690221.1.1692_U	Alveolates-Dinoflagellates	Dinophyceae	Eukaryota; Alveolata; Dinophyta; Dinophyceae; Dinophyceae_X; Dinophyceae_XX; Dinophyceae_XXX; Dinophyceae_XXX_sp.;	-0.760024	-0.760024	-0.760024	3	2	16	1	0	-0.392876	0.096125	-0.768342	0.000196	1	-0.538833	0.017292	-0.712442	0.000908	1	0	0.157969	0	0.054221	1e-06	16	118
Stramenopiles-Chrysophytes_Stramenopiles-MAST	AY129065.1.1781_U	Stramenopiles-Chrysophytes	Chrysophyceae_Clade-H	Eukaryota; Stramenopiles; Ochrophyta; Chrysophyceae; Chrysophyceae_X; Chrysophyceae_Clade-H; Chrysophyceae_Clade-H_X; Chrysophyceae_Clade-H_X_sp.;	KC582992.1.1792_U	Stramenopiles-MAST	MAST-3	Eukaryota; Stramenopiles; Stramenopiles_X; MAST; MAST-3; MAST-3L; MAST-3L_X; MAST-3L_X_sp.;	0.853252	0.853252	0.853252	3	3	16	0	0	0.865076	2e-06	0.865076	2e-06	0	0.82309	1.5e-05	0.82309	1.5e-05	0	0	0.000119	0	0.000521	0	16	119
Stramenopiles-Chrysophytes_Stramenopiles-Other	AY129065.1.1781_U	Stramenopiles-Chrysophytes	Chrysophyceae_Clade-H	Eukaryota; Stramenopiles; Ochrophyta; Chrysophyceae; Chrysophyceae_X; Chrysophyceae_Clade-H; Chrysophyceae_Clade-H_X; Chrysophyceae_Clade-H_X_sp.;	EF695169.1.817_U	Stramenopiles-Other	Florenciellales	Eukaryota; Stramenopiles; Ochrophyta; Dictyochophyceae; Dictyochophyceae_X; Florenciellales; Florenciellales_X; Florenciellales_X_sp.;	-0.646326	-0.646326	-0.646326	1	1	18	0	0.026	-0.715291	0.000576	-0.715291	0.000576	0	-0.688323	0.001121	-0.688323	0.001121	0	0.116273	0.005584	1e-06	0.008311	1e-06	16	121
Stramenopiles-Chrysophytes_Stramenopiles-Other	AY129065.1.1781_U	Stramenopiles-Chrysophytes	Chrysophyceae_Clade-H	Eukaryota; Stramenopiles; Ochrophyta; Chrysophyceae; Chrysophyceae_X; Chrysophyceae_Clade-H; Chrysophyceae_Clade-H_X; Chrysophyceae_Clade-H_X_sp.;	EU500153.1.840_U	Stramenopiles-Other	Rhizochromulinales	Eukaryota; Stramenopiles; Ochrophyta; Dictyochophyceae; Dictyochophyceae_X; Rhizochromulinales; Rhizochromulinales_X; Rhizochromulinales_X_sp.;	0.730773	0.730773	0.730773	3	1	14	2	0.001	-0.099157	0.686309	0.681401	0.002595	2	0.04978	0.83962	0.709542	0.001422	2	0.017494	0.486096	1e-06	0.577811	1e-06	16	123
Stramenopiles-Chrysophytes_Haptophytes	AY129065.1.1781_U	Stramenopiles-Chrysophytes	Chrysophyceae_Clade-H	Eukaryota; Stramenopiles; Ochrophyta; Chrysophyceae; Chrysophyceae_X; Chrysophyceae_Clade-H; Chrysophyceae_Clade-H_X; Chrysophyceae_Clade-H_X_sp.;	HG970975	Haptophytes	Haptophyta	Eukaryota; Hacrobia; Haptophyta; Haptophyta_X; Haptophyta_XX; Haptophyta_XXX; Haptophyta_XXXX; Haptophyta_XXXX_sp.;	-0.757086	-0.757086	-0.757086	3	3	16	0	0	-0.765897	0.000132	-0.765897	0.000132	0	-0.693591	0.00099	-0.693591	0.00099	0	0	0.002094	0	0.007622	1e-06	16	126
Stramenopiles-Chrysophytes_Alveolates-Ciliates	AY129065.1.1781_U	Stramenopiles-Chrysophytes	Chrysophyceae_Clade-H	Eukaryota; Stramenopiles; Ochrophyta; Chrysophyceae; Chrysophyceae_X; Chrysophyceae_Clade-H; Chrysophyceae_Clade-H_X; Chrysophyceae_Clade-H_X_sp.;	FJ422993.1.1778_U	Alveolates-Ciliates	Spirotrichea	Eukaryota; Alveolata; Ciliophora; Spirotrichea; Strombidiida; Tontoniidae_B; Pseudotontonia; Pseudotontonia_simplicidens;	-0.620052	-0.620052	-0.620052	2	2	14	0	0.048	-0.624103	0.004291	-0.624103	0.004291	0	-0.609039	0.005645	-0.609039	0.005645	0	0.158724	0.021472	2e-06	0.024926	2e-06	16	129
Stramenopiles-Chrysophytes_Alveolates-Syndiniales	AY129065.1.1781_U	Stramenopiles-Chrysophytes	Chrysophyceae_Clade-H	Eukaryota; Stramenopiles; Ochrophyta; Chrysophyceae; Chrysophyceae_X; Chrysophyceae_Clade-H; Chrysophyceae_Clade-H_X; Chrysophyceae_Clade-H_X_sp.;	HQ870498.1.849_U	Alveolates-Syndiniales	Dino-Group-III	Eukaryota; Alveolata; Dinophyta; Syndiniales; Dino-Group-III; Dino-Group-III_X; Dino-Group-III_XX; Dino-Group-III_XX_sp.;	-0.782686	-0.782686	-0.782686	1	1	19	0	0	-0.78054	8e-05	-0.78054	8e-05	0	-0.779781	8.3e-05	-0.779781	8.3e-05	0	0	0.001485	0	0.001499	0	16	132
Stramenopiles-Chrysophytes_Stramenopiles-Diatoms	AY129065.1.1781_U	Stramenopiles-Chrysophytes	Chrysophyceae_Clade-H	Eukaryota; Stramenopiles; Ochrophyta; Chrysophyceae; Chrysophyceae_X; Chrysophyceae_Clade-H; Chrysophyceae_Clade-H_X; Chrysophyceae_Clade-H_X_sp.;	GU822947.1.1074_U	Stramenopiles-Diatoms	Haslea	Eukaryota; Stramenopiles; Ochrophyta; Bacillariophyta; Bacillariophyta_X; Raphid-pennate; Haslea; Haslea_sp.;	0.647983	0.647983	0.647983	4	4	15	0	0.032	0.552244	0.014217	0.552244	0.014217	0	0.600351	0.006572	0.600351	0.006572	0	0.129095	0.046406	3e-06	0.027551	2e-06	16	139
Stramenopiles-Chrysophytes_Stramenopiles-Chrysophytes	AY129065.1.1781_U	Stramenopiles-Chrysophytes	Chrysophyceae_Clade-H	Eukaryota; Stramenopiles; Ochrophyta; Chrysophyceae; Chrysophyceae_X; Chrysophyceae_Clade-H; Chrysophyceae_Clade-H_X; Chrysophyceae_Clade-H_X_sp.;	KC582997.1.1775_U	Stramenopiles-Chrysophytes	Chrysophyceae_Clade-I	Eukaryota; Stramenopiles; Ochrophyta; Chrysophyceae; Chrysophyceae_X; Chrysophyceae_Clade-I; Chrysophyceae_Clade-I_X; Chrysophyceae_Clade-I_X_sp.;	0.750438	0.750438	0.750438	3	3	16	0	0	0.775467	9.6e-05	0.775467	9.6e-05	0	0.740334	0.000289	0.740334	0.000289	0	0	0.001668	0	0.003356	0	16	142
Stramenopiles-Chrysophytes_Stramenopiles-Diatoms	AY129065.1.1781_U	Stramenopiles-Chrysophytes	Chrysophyceae_Clade-H	Eukaryota; Stramenopiles; Ochrophyta; Chrysophyceae; Chrysophyceae_X; Chrysophyceae_Clade-H; Chrysophyceae_Clade-H_X; Chrysophyceae_Clade-H_X_sp.;	EU499988.1.803_U	Stramenopiles-Diatoms	Raphid-pennate	Eukaryota; Stramenopiles; Ochrophyta; Bacillariophyta; Bacillariophyta_X; Raphid-pennate; Raphid-pennate_X; Raphid-pennate_X_sp.;	0.743989	0.743989	0.743989	3	3	16	0	0.003	0.713581	0.000602	0.713581	0.000602	0	0.739798	0.000294	0.739798	0.000294	0	0.033974	0.005701	1e-06	0.003392	0	16	145
Stramenopiles-Chrysophytes_Cryptophytes	AY129065.1.1781_U	Stramenopiles-Chrysophytes	Chrysophyceae_Clade-H	Eukaryota; Stramenopiles; Ochrophyta; Chrysophyceae; Chrysophyceae_X; Chrysophyceae_Clade-H; Chrysophyceae_Clade-H_X; Chrysophyceae_Clade-H_X_sp.;	GQ863814.1.1651_U	Cryptophytes	Other-unclassified	Eukaryota; Hacrobia; Cryptophyta; Cryptophyceae; Cryptophyceae_X; Goniomonadales; Goniomonas; Goniomonas_sp.;	-0.703628	-0.703628	-0.703628	2	2	17	0	0.01	-0.747893	0.000232	-0.747893	0.000232	0	-0.710272	0.000656	-0.710272	0.000656	0	0.067958	0.00304	0	0.005746	1e-06	16	146
Stramenopiles-Chrysophytes_Stramenopiles-MAST	AY129065.1.1781_U	Stramenopiles-Chrysophytes	Chrysophyceae_Clade-H	Eukaryota; Stramenopiles; Ochrophyta; Chrysophyceae; Chrysophyceae_X; Chrysophyceae_Clade-H; Chrysophyceae_Clade-H_X; Chrysophyceae_Clade-H_X_sp.;	AJ402350.1.1758_U	Stramenopiles-MAST	MAST-1	Eukaryota; Stramenopiles; Stramenopiles_X; MAST; MAST-1; MAST-1D; MAST-1D_X; MAST-1D_X_sp.;	-0.763496	-0.763496	-0.763496	3	3	16	0	0.001	-0.759603	0.000161	-0.759603	0.000161	0	-0.71993	0.00051	-0.71993	0.00051	0	0.017494	0.0024	0	0.004859	1e-06	16	150
Stramenopiles-Chrysophytes_DO	AY129065.1.1781_U	Stramenopiles-Chrysophytes	Chrysophyceae_Clade-H	Eukaryota; Stramenopiles; Ochrophyta; Chrysophyceae; Chrysophyceae_X; Chrysophyceae_Clade-H; Chrysophyceae_Clade-H_X; Chrysophyceae_Clade-H_X_sp.;	DO	DO	NA	NA	-0.613792	-0.613792	-0.613792	3	3	16	0	0.046	-0.616101	0.004972	-0.749512	0.003182	-6	-0.571303	0.010615	-0.571303	0.010615	0	0.154843	0.023579	2e-06	0.038686	3e-06	16	204
Alveolates-Ciliates_Alveolates-Ciliates	GU819329.1.1180_U	Alveolates-Ciliates	Spirotrichea	Eukaryota; Alveolata; Ciliophora; Spirotrichea; Strombidiida; Strombidiidae_L; Strombidiidae_L_X; Strombidiidae_L_X_sp.;	AY143567.1.1682_U	Alveolates-Ciliates	Spirotrichea	Eukaryota; Alveolata; Ciliophora; Spirotrichea; Tintinnida; Rhabdonellidae; Metacylis; Metacylis_sp.;	0.609726	0.609726	0.609726	1	1	15	0	0.044	0.460942	0.047005	-0.621623	0.010151	3	0.511853	0.025073	0.511853	0.025073	0	0.151655	0.101862	3e-06	0.069476	4e-06	17	19
Alveolates-Ciliates_Stramenopiles-Other	GU819329.1.1180_U	Alveolates-Ciliates	Spirotrichea	Eukaryota; Alveolata; Ciliophora; Spirotrichea; Strombidiida; Strombidiidae_L; Strombidiidae_L_X; Strombidiidae_L_X_sp.;	EF695122.1.814_U	Stramenopiles-Other	MOCH-2	Eukaryota; Stramenopiles; Stramenopiles_X; MOCH; MOCH-2; MOCH-2_X; MOCH-2_XX; MOCH-2_XX_sp.;	0.622807	0.622807	0.622807	1	3	15	-2	0.041	0.160967	0.510333	0.505257	0.065337	-5	0.080844	0.742152	0.535299	0.026805	-2	0.146981	0.420155	7e-06	0.545697	5e-06	17	60
Alveolates-Ciliates_Stramenopiles-MAST	GU819329.1.1180_U	Alveolates-Ciliates	Spirotrichea	Eukaryota; Alveolata; Ciliophora; Spirotrichea; Strombidiida; Strombidiidae_L; Strombidiidae_L_X; Strombidiidae_L_X_sp.;	JQ781961.1.1805_U	Stramenopiles-MAST	MAST-4	Eukaryota; Stramenopiles; Stramenopiles_X; MAST; MAST-4; MAST-4A; MAST-4A_X; MAST-4A_X_sp.;	-0.604397	-0.604397	-0.604397	5	3	12	2	0.047	0.308768	0.198366	-0.642254	0.005436	2	0.253661	0.294693	-0.682425	0.002542	2	0.156743	0.246293	2e-06	0.334721	1e-06	17	99
Alveolates-Ciliates_Alveolates-Syndiniales	GU819329.1.1180_U	Alveolates-Ciliates	Spirotrichea	Eukaryota; Alveolata; Ciliophora; Spirotrichea; Strombidiida; Strombidiidae_L; Strombidiidae_L_X; Strombidiidae_L_X_sp.;	EU780604.1.1660_U	Alveolates-Syndiniales	Dino-Group-III	Eukaryota; Alveolata; Dinophyta; Syndiniales; Dino-Group-III; Dino-Group-III_X; Dino-Group-III_XX; Dino-Group-III_XX_sp.;	0.639189	0.639189	0.639189	1	1	11	0	0.019	0.577088	0.009682	-0.577765	0.038641	-6	0.506585	0.02687	0.506585	0.02687	0	0.097312	0.036484	5e-06	0.072836	5e-06	17	103
Alveolates-Ciliates_Alveolates-Ciliates	GU819329.1.1180_U	Alveolates-Ciliates	Spirotrichea	Eukaryota; Alveolata; Ciliophora; Spirotrichea; Strombidiida; Strombidiidae_L; Strombidiidae_L_X; Strombidiidae_L_X_sp.;	KF129723.1.1735_U	Alveolates-Ciliates	Spirotrichea	Eukaryota; Alveolata; Ciliophora; Spirotrichea; Strombidiida_D; Strombidiida_D_X; Strombidiida_D_XX; Strombidiida_D_XX_sp.;	0.617533	0.617533	0.617533	1	2	15	-1	0.041	0.143697	0.557272	0.657103	0.003047	-1	0.183414	0.452281	0.493547	0.037389	-1	0.146981	0.43934	2e-06	0.423486	6e-06	17	128
Alveolates-Ciliates_Alveolates-Ciliates	GU819329.1.1180_U	Alveolates-Ciliates	Spirotrichea	Eukaryota; Alveolata; Ciliophora; Spirotrichea; Strombidiida; Strombidiidae_L; Strombidiidae_L_X; Strombidiidae_L_X_sp.;	KJ762879.1.1770_U	Alveolates-Ciliates	Spirotrichea	Eukaryota; Alveolata; Ciliophora; Spirotrichea; Strombidiida; Strombidiidae_L; Strombidiidae_L_X; Strombidiidae_L_X_sp.;	0.622124	0.622124	0.622124	1	1	18	0	0.034	0.713866	0.000598	0.713866	0.000598	0	0.604836	0.006079	0.604836	0.006079	0	0.133349	0.00568	1e-06	0.026099	2e-06	17	149
Alveolates-Dinoflagellates_Stramenopiles-MAST	AY664900.1.1755_U	Alveolates-Dinoflagellates	Dinophyceae	Eukaryota; Alveolata; Dinophyta; Dinophyceae; Dinophyceae_X; Dinophyceae_XX; Dinophyceae_XXX; Dinophyceae_XXX_sp.;	JQ781961.1.1805_U	Stramenopiles-MAST	MAST-4	Eukaryota; Stramenopiles; Stramenopiles_X; MAST; MAST-4; MAST-4A; MAST-4A_X; MAST-4A_X_sp.;	0.652846	0.652846	0.652846	1	4	11	-3	0.021	-0.356231	0.1344	0.702379	0.002415	-3	-0.341321	0.152674	-0.578255	0.0303	5	0.10319	0.194714	1e-06	0.22461	5e-06	18	99
Alveolates-Dinoflagellates_Stramenopiles-MAST	AY664900.1.1755_U	Alveolates-Dinoflagellates	Dinophyceae	Eukaryota; Alveolata; Dinophyta; Dinophyceae; Dinophyceae_X; Dinophyceae_XX; Dinophyceae_XXX; Dinophyceae_XXX_sp.;	AY116221.1.1791_U	Stramenopiles-MAST	MAST-3	Eukaryota; Stramenopiles; Stramenopiles_X; MAST; MAST-3; MAST-3J; MAST-3J_X; MAST-3J_X_sp.;	0.624149	0.624149	0.624149	7	2	10	5	0.03	0.3625	0.127195	0.665085	0.009446	5	0.197802	0.416944	0.678416	0.007649	5	0.125466	0.187983	3e-06	0.405112	2e-06	18	107
Alveolates-Dinoflagellates_Stramenopiles-MAST	AY664900.1.1755_U	Alveolates-Dinoflagellates	Dinophyceae	Eukaryota; Alveolata; Dinophyta; Dinophyceae; Dinophyceae_X; Dinophyceae_XX; Dinophyceae_XXX; Dinophyceae_XXX_sp.;	EU499985.1.853_U	Stramenopiles-MAST	MAST-7	Eukaryota; Stramenopiles; Stramenopiles_X; MAST; MAST-7; MAST-7B; MAST-7B_X; MAST-7B_X_sp.;	0.629416	0.629416	0.629416	1	4	13	-3	0.043	-0.473788	0.040444	0.625854	0.009505	-3	-0.442883	0.057565	0.569324	0.021342	-3	0.150291	0.092531	3e-06	0.121162	4e-06	18	110
Alveolates-Dinoflagellates_Alveolates-Ciliates	AY664900.1.1755_U	Alveolates-Dinoflagellates	Dinophyceae	Eukaryota; Alveolata; Dinophyta; Dinophyceae; Dinophyceae_X; Dinophyceae_XX; Dinophyceae_XXX; Dinophyceae_XXX_sp.;	FJ422993.1.1778_U	Alveolates-Ciliates	Spirotrichea	Eukaryota; Alveolata; Ciliophora; Spirotrichea; Strombidiida; Tontoniidae_B; Pseudotontonia; Pseudotontonia_simplicidens;	-0.684809	-0.684809	-0.684809	7	2	11	5	0.011	-0.254205	0.293623	-0.787951	0.000817	5	-0.153779	0.52964	-0.742293	0.002363	5	0.071521	0.309664	1e-06	0.460244	1e-06	18	129
Alveolates-Dinoflagellates_Alveolates-Ciliates	AY664900.1.1755_U	Alveolates-Dinoflagellates	Dinophyceae	Eukaryota; Alveolata; Dinophyta; Dinophyceae; Dinophyceae_X; Dinophyceae_XX; Dinophyceae_XXX; Dinophyceae_XXX_sp.;	EF526990.1.1547_U	Alveolates-Ciliates	Spirotrichea	Eukaryota; Alveolata; Ciliophora; Spirotrichea; Strombidiida; Strombidiidae_H; Strombidiidae_H_X; Strombidiidae_H_X_sp.;	-0.701439	-0.701439	-0.701439	1	2	17	-1	0.007	-0.06244	0.799543	-0.689057	0.001562	-1	-0.112967	0.645185	-0.693741	0.001407	-1	0.055193	0.524708	1e-06	0.50868	1e-06	18	143
Alveolates-Dinoflagellates_Stramenopiles-Other	AY664900.1.1755_U	Alveolates-Dinoflagellates	Dinophyceae	Eukaryota; Alveolata; Dinophyta; Dinophyceae; Dinophyceae_X; Dinophyceae_XX; Dinophyceae_XXX; Dinophyceae_XXX_sp.;	EU500084.1.817_U	Stramenopiles-Other	MOCH-2	Eukaryota; Stramenopiles; Stramenopiles_X; MOCH; MOCH-2; MOCH-2_X; MOCH-2_XX; MOCH-2_XX_sp.;	0.643798	0.643798	0.643798	8	1	12	7	0.028	-0.318743	0.1835	0.745779	0.005356	7	-0.105448	0.667461	0.942208	5e-06	7	0.120985	0.235124	2e-06	0.516385	0	18	144
Alveolates-Ciliates_Alveolates-Dinoflagellates	AY143567.1.1682_U	Alveolates-Ciliates	Spirotrichea	Eukaryota; Alveolata; Ciliophora; Spirotrichea; Tintinnida; Rhabdonellidae; Metacylis; Metacylis_sp.;	EU087269.1.895_U	Alveolates-Dinoflagellates	Pfiesteriaceae	Eukaryota; Alveolata; Dinophyta; Dinophyceae; Dinophyceae_X; Pfiesteriaceae; Pfiesteriaceae_X; Pfiesteriaceae_X_sp.;	0.631969	0.631969	0.631969	1	2	16	-1	0.032	0.390295	0.098526	0.622594	0.005788	-1	0.479158	0.037921	0.527348	0.024514	-1	0.129095	0.160358	2e-06	0.092072	4e-06	19	22
Alveolates-Ciliates_Alveolates-Syndiniales	AY143567.1.1682_U	Alveolates-Ciliates	Spirotrichea	Eukaryota; Alveolata; Ciliophora; Spirotrichea; Tintinnida; Rhabdonellidae; Metacylis; Metacylis_sp.;	FJ431723.1.830_U	Alveolates-Syndiniales	Dino-Group-III	Eukaryota; Alveolata; Dinophyta; Syndiniales; Dino-Group-III; Dino-Group-III_X; Dino-Group-III_XX; Dino-Group-III_XX_sp.;	0.637156	0.637156	0.637156	1	1	19	0	0.023	0.411026	0.080427	-0.539412	0.02544	2	0.655838	0.002297	0.655838	0.002297	0	0.108834	0.141784	4e-06	0.013579	1e-06	19	27
Alveolates-Ciliates_Stramenopiles-Other	AY143567.1.1682_U	Alveolates-Ciliates	Spirotrichea	Eukaryota; Alveolata; Ciliophora; Spirotrichea; Tintinnida; Rhabdonellidae; Metacylis; Metacylis_sp.;	GU823203.1.1203_U	Stramenopiles-Other	Dictyochales	Eukaryota; Stramenopiles; Ochrophyta; Dictyochophyceae; Dictyochophyceae_X; Dictyochales; Dictyochales_X; Dictyochales_X_sp.;	0.75325	0.75325	0.75325	1	1	18	0	0.001	0.638916	0.003232	0.638916	0.003232	0	0.737489	0.000314	0.737489	0.000314	0	0.017494	0.017727	2e-06	0.003545	0	19	35
Alveolates-Ciliates_Stramenopiles-MAST	AY143567.1.1682_U	Alveolates-Ciliates	Spirotrichea	Eukaryota; Alveolata; Ciliophora; Spirotrichea; Tintinnida; Rhabdonellidae; Metacylis; Metacylis_sp.;	HM163291.1.1682_U	Stramenopiles-MAST	MAST-3	Eukaryota; Stramenopiles; Stramenopiles_X; MAST; MAST-3; MAST-3I; MAST-3I_X; MAST-3I_X_sp.;	-0.715553	-0.715553	-0.715553	1	1	19	0	0.003	-0.463402	0.04569	0.541975	0.055711	-6	-0.755595	0.000183	-0.755595	0.000183	0	0.033974	0.100247	6e-06	0.002478	0	19	39
Alveolates-Ciliates_Alveolates-Dinoflagellates	AY143567.1.1682_U	Alveolates-Ciliates	Spirotrichea	Eukaryota; Alveolata; Ciliophora; Spirotrichea; Tintinnida; Rhabdonellidae; Metacylis; Metacylis_sp.;	FJ217814.1.1521_U	Alveolates-Dinoflagellates	Azadinium	Eukaryota; Alveolata; Dinophyta; Dinophyceae; Dinophyceae_X; Dinophyceae_XX; Azadinium; Azadinium_spinosum;	0.60263	0.60263	0.60263	1	1	18	0	0.04	0.410913	0.080518	-0.50321	0.039486	2	0.625988	0.004142	0.625988	0.004142	0	0.145146	0.141842	5e-06	0.020015	2e-06	19	43
Alveolates-Ciliates_Alveolates-Dinoflagellates	AY143567.1.1682_U	Alveolates-Ciliates	Spirotrichea	Eukaryota; Alveolata; Ciliophora; Spirotrichea; Tintinnida; Rhabdonellidae; Metacylis; Metacylis_sp.;	HM581705.1.1793_U	Alveolates-Dinoflagellates	Dinophyceae	Eukaryota; Alveolata; Dinophyta; Dinophyceae; Dinophyceae_X; Dinophyceae_XX; Dinophyceae_XXX; Dinophyceae_XXX_sp.;	0.635864	0.635864	0.635864	1	1	19	0	0.019	0.465141	0.044777	-0.518902	0.039438	-3	0.625549	0.004177	0.625549	0.004177	0	0.097312	0.09889	5e-06	0.020077	2e-06	19	55
Alveolates-Ciliates_Stramenopiles-MAST	AY143567.1.1682_U	Alveolates-Ciliates	Spirotrichea	Eukaryota; Alveolata; Ciliophora; Spirotrichea; Tintinnida; Rhabdonellidae; Metacylis; Metacylis_sp.;	GU823216.1.1365_U	Stramenopiles-MAST	MAST-3	Eukaryota; Stramenopiles; Stramenopiles_X; MAST; MAST-3; MAST-3I; MAST-3I_X; MAST-3I_X_sp.;	-0.758387	-0.758387	-0.758387	1	1	18	0	0.001	-0.625208	0.004203	-0.625208	0.004203	0	-0.769636	0.000117	-0.769636	0.000117	0	0.017494	0.021228	2e-06	0.001855	0	19	61
Alveolates-Ciliates_Stramenopiles-Diatoms	AY143567.1.1682_U	Alveolates-Ciliates	Spirotrichea	Eukaryota; Alveolata; Ciliophora; Spirotrichea; Tintinnida; Rhabdonellidae; Metacylis; Metacylis_sp.;	AY256270.1.1308_U	Stramenopiles-Diatoms	Araphid-pennate	Eukaryota; Stramenopiles; Ochrophyta; Bacillariophyta; Bacillariophyta_X; Araphid-pennate; Araphid-pennate_X; Araphid-pennate_X_sp.;	-0.665211	-0.665211	-0.665211	1	4	16	-3	0.011	0.33114	0.166096	-0.910812	1e-06	-3	0.477402	0.038732	-0.761765	0.000605	-3	0.071521	0.221088	0	0.093312	1e-06	19	112
Alveolates-Ciliates_Alveolates-Dinoflagellates	AY143567.1.1682_U	Alveolates-Ciliates	Spirotrichea	Eukaryota; Alveolata; Ciliophora; Spirotrichea; Tintinnida; Rhabdonellidae; Metacylis; Metacylis_sp.;	KJ759269.1.1802_U	Alveolates-Dinoflagellates	Dinophyceae	Eukaryota; Alveolata; Dinophyta; Dinophyceae; Dinophyceae_X; Dinophyceae_XX; Dinophyceae_XXX; Dinophyceae_XXX_sp.;	-0.618964	-0.618964	-0.618964	1	4	16	-3	0.029	0.52818	0.020094	-0.808614	0.00015	-3	0.577954	0.009548	-0.759382	0.000645	-3	0.123397	0.058234	0	0.035827	1e-06	19	116
Alveolates-Ciliates_Alveolates-Ciliates	AY143567.1.1682_U	Alveolates-Ciliates	Spirotrichea	Eukaryota; Alveolata; Ciliophora; Spirotrichea; Tintinnida; Rhabdonellidae; Metacylis; Metacylis_sp.;	KJ759417.1.1743_U	Alveolates-Ciliates	Spirotrichea	Eukaryota; Alveolata; Ciliophora; Spirotrichea; Choreotrichida; Leegaardiellidae_B; Leegaardiella; Leegaardiella_sp.;	-0.630325	-0.630325	-0.630325	6	1	12	5	0.03	-0.13045	0.59452	-0.703565	0.004989	5	-0.116975	0.633427	-0.783279	0.000921	5	0.125466	0.452888	2e-06	0.50416	1e-06	19	124
Alveolates-Ciliates_Haptophytes	AY143567.1.1682_U	Alveolates-Ciliates	Spirotrichea	Eukaryota; Alveolata; Ciliophora; Spirotrichea; Tintinnida; Rhabdonellidae; Metacylis; Metacylis_sp.;	HG970975	Haptophytes	Haptophyta	Eukaryota; Hacrobia; Haptophyta; Haptophyta_X; Haptophyta_XX; Haptophyta_XXX; Haptophyta_XXXX; Haptophyta_XXXX_sp.;	-0.646417	-0.646417	-0.646417	4	2	16	2	0.023	0.080033	0.744656	-0.595595	0.011646	2	0.072871	0.766873	-0.707975	0.001473	2	0.108834	0.507031	3e-06	0.553859	1e-06	19	126
Alveolates-Ciliates_Alveolates-Ciliates	AY143567.1.1682_U	Alveolates-Ciliates	Spirotrichea	Eukaryota; Alveolata; Ciliophora; Spirotrichea; Tintinnida; Rhabdonellidae; Metacylis; Metacylis_sp.;	KF129723.1.1735_U	Alveolates-Ciliates	Spirotrichea	Eukaryota; Alveolata; Ciliophora; Spirotrichea; Strombidiida_D; Strombidiida_D_X; Strombidiida_D_XX; Strombidiida_D_XX_sp.;	0.609256	0.609256	0.609256	1	2	17	-1	0.044	0.083306	0.734564	0.575206	0.012509	-1	0.306275	0.202202	0.574819	0.012582	-1	0.151655	0.503783	3e-06	0.26682	3e-06	19	128
Stramenopiles-Chrysophytes_Alveolates-Ciliates	KC583138.1.1098_U	Stramenopiles-Chrysophytes	Chrysophyceae_Clade-H	Eukaryota; Stramenopiles; Ochrophyta; Chrysophyceae; Chrysophyceae_X; Chrysophyceae_Clade-H; Chrysophyceae_Clade-H_X; Chrysophyceae_Clade-H_X_sp.;	KJ759341.1.1721_U	Alveolates-Ciliates	Phyllopharyngea	Eukaryota; Alveolata; Ciliophora; Phyllopharyngea; Cyrtophoria; Chlamydodontidae; Chlamydodon; Chlamydodon_sp.;	0.616986	0.616986	0.616986	1	6	14	-5	0.031	0.350851	0.140807	0.611065	0.020255	-5	0.370224	0.1187	0.67033	0.008704	-5	0.127199	0.200443	4e-06	0.19205	3e-06	20	24
Stramenopiles-Chrysophytes_Alveolates-Ciliates	KC583138.1.1098_U	Stramenopiles-Chrysophytes	Chrysophyceae_Clade-H	Eukaryota; Stramenopiles; Ochrophyta; Chrysophyceae; Chrysophyceae_X; Chrysophyceae_Clade-H; Chrysophyceae_Clade-H_X; Chrysophyceae_Clade-H_X_sp.;	GU819492.1.1175_U	Alveolates-Ciliates	Spirotrichea	Eukaryota; Alveolata; Ciliophora; Spirotrichea; Strombidiida; Strombidiidae_J; Strombidiidae_J_X; Strombidiidae_J_X_sp.;	0.609069	0.609069	0.609069	1	6	14	-5	0.039	0.306792	0.201402	0.631891	0.015339	-5	0.370663	0.118229	0.665934	0.009323	-5	0.143381	0.248469	3e-06	0.191668	3e-06	20	25
Stramenopiles-Chrysophytes_Alveolates-Dinoflagellates	KC583138.1.1098_U	Stramenopiles-Chrysophytes	Chrysophyceae_Clade-H	Eukaryota; Stramenopiles; Ochrophyta; Chrysophyceae; Chrysophyceae_X; Chrysophyceae_Clade-H; Chrysophyceae_Clade-H_X; Chrysophyceae_Clade-H_X_sp.;	GU825315.1.1202_U	Alveolates-Dinoflagellates	Dinophyceae	Eukaryota; Alveolata; Dinophyta; Dinophyceae; Dinophyceae_X; Dinophyceae_XX; Dinophyceae_XXX; Dinophyceae_XXX_sp.;	-0.632934	-0.632934	-0.632934	1	6	13	-5	0.028	-0.487528	0.034231	-0.723011	0.00348	-5	-0.531168	0.019274	-0.723077	0.003475	-5	0.120985	0.083188	2e-06	0.058555	2e-06	20	32
Stramenopiles-Chrysophytes_Alveolates-Ciliates	KC583138.1.1098_U	Stramenopiles-Chrysophytes	Chrysophyceae_Clade-H	Eukaryota; Stramenopiles; Ochrophyta; Chrysophyceae; Chrysophyceae_X; Chrysophyceae_Clade-H; Chrysophyceae_Clade-H_X; Chrysophyceae_Clade-H_X_sp.;	KY290313.1.1621_U	Alveolates-Ciliates	Spirotrichea	Eukaryota; Alveolata; Ciliophora; Spirotrichea; Choreotrichida; Leegaardiellidae_B; Leegaardiella; Leegaardiella_sp.;	0.63173	0.63173	0.63173	1	1	19	0	0.03	0.584958	0.008519	0.584958	0.008519	0	0.665055	0.00189	0.665055	0.00189	0	0.125466	0.033634	3e-06	0.011786	1e-06	20	36
Stramenopiles-Chrysophytes_Stramenopiles-MAST	KC583138.1.1098_U	Stramenopiles-Chrysophytes	Chrysophyceae_Clade-H	Eukaryota; Stramenopiles; Ochrophyta; Chrysophyceae; Chrysophyceae_X; Chrysophyceae_Clade-H; Chrysophyceae_Clade-H_X; Chrysophyceae_Clade-H_X_sp.;	JQ782004.1.1784_U	Stramenopiles-MAST	MAST-1	Eukaryota; Stramenopiles; Stramenopiles_X; MAST; MAST-1; MAST-1C; MAST-1C_X; MAST-1C_X_sp.;	-0.695064	-0.695064	-0.695064	2	2	17	0	0.006	-0.522107	0.021845	-0.615349	0.006562	1	-0.637083	0.00335	-0.637083	0.00335	0	0.050667	0.061782	2e-06	0.017421	2e-06	20	37
Stramenopiles-Chrysophytes_Alveolates-Dinoflagellates	KC583138.1.1098_U	Stramenopiles-Chrysophytes	Chrysophyceae_Clade-H	Eukaryota; Stramenopiles; Ochrophyta; Chrysophyceae; Chrysophyceae_X; Chrysophyceae_Clade-H; Chrysophyceae_Clade-H_X; Chrysophyceae_Clade-H_X_sp.;	FJ217814.1.1521_U	Alveolates-Dinoflagellates	Azadinium	Eukaryota; Alveolata; Dinophyta; Dinophyceae; Dinophyceae_X; Dinophyceae_XX; Azadinium; Azadinium_spinosum;	-0.657738	-0.657738	-0.657738	1	6	14	-5	0.011	-0.531177	0.019271	-0.708823	0.004538	-5	-0.505929	0.027101	-0.78022	0.000994	-5	0.071521	0.056617	2e-06	0.073277	1e-06	20	43
Stramenopiles-Chrysophytes_Alveolates-Ciliates	KC583138.1.1098_U	Stramenopiles-Chrysophytes	Chrysophyceae_Clade-H	Eukaryota; Stramenopiles; Ochrophyta; Chrysophyceae; Chrysophyceae_X; Chrysophyceae_Clade-H; Chrysophyceae_Clade-H_X; Chrysophyceae_Clade-H_X_sp.;	KF130183.1.1714_U	Alveolates-Ciliates	Colpodea	Eukaryota; Alveolata; Ciliophora; Colpodea; Colpodea-1; Colpodea-1_X; Colpodea-1_XX; Colpodea-1_XX_sp.;	-0.721317	-0.721317	-0.721317	1	5	15	-4	0.001	0.47535	0.039697	-0.84698	6.8e-05	-4	0.607051	0.005847	-0.833791	0.000112	-4	0.017494	0.091577	0	0.025483	0	20	48
Stramenopiles-Chrysophytes_Stramenopiles-Pelagophytes	KC583138.1.1098_U	Stramenopiles-Chrysophytes	Chrysophyceae_Clade-H	Eukaryota; Stramenopiles; Ochrophyta; Chrysophyceae; Chrysophyceae_X; Chrysophyceae_Clade-H; Chrysophyceae_Clade-H_X; Chrysophyceae_Clade-H_X_sp.;	GU196150.1.1374_U	Stramenopiles-Pelagophytes	Pelagomonadaceae_clade_A	Eukaryota; Stramenopiles; Ochrophyta; Pelagophyceae; Pelagomonadales; Pelagomonadaceae; Pelagomonadaceae_clade_A; Pelagomonadaceae_clade_A_sp.;	-0.661659	-0.661659	-0.661659	2	1	14	1	0.008	-0.378979	0.109568	-0.703665	0.00498	-5	-0.475856	0.039457	-0.683885	0.00175	1	0.059414	0.171446	2e-06	0.094542	1e-06	20	52
Stramenopiles-Chrysophytes_Alveolates-Dinoflagellates	KC583138.1.1098_U	Stramenopiles-Chrysophytes	Chrysophyceae_Clade-H	Eukaryota; Stramenopiles; Ochrophyta; Chrysophyceae; Chrysophyceae_X; Chrysophyceae_Clade-H; Chrysophyceae_Clade-H_X; Chrysophyceae_Clade-H_X_sp.;	HE611580.1.1746_U	Alveolates-Dinoflagellates	Gyrodinium	Eukaryota; Alveolata; Dinophyta; Dinophyceae; Dinophyceae_X; Dinophyceae_XX; Gyrodinium; Gyrodinium_sp.;	-0.612108	-0.612108	-0.612108	1	6	14	-5	0.043	-0.480471	0.037322	-0.70719	0.004675	-5	-0.517347	0.023299	-0.740659	0.002445	-5	0.150291	0.088155	2e-06	0.066073	1e-06	20	65
Stramenopiles-Chrysophytes_Alveolates-Dinoflagellates	KC583138.1.1098_U	Stramenopiles-Chrysophytes	Chrysophyceae_Clade-H	Eukaryota; Stramenopiles; Ochrophyta; Chrysophyceae; Chrysophyceae_X; Chrysophyceae_Clade-H; Chrysophyceae_Clade-H_X; Chrysophyceae_Clade-H_X_sp.;	HM581766.1.1782_U	Alveolates-Dinoflagellates	Prorocentrum	Eukaryota; Alveolata; Dinophyta; Dinophyceae; Dinophyceae_X; Dinophyceae_XX; Prorocentrum; Prorocentrum_sp.;	-0.714483	-0.714483	-0.714483	1	6	14	-5	0.002	-0.436119	0.06195	-0.72556	0.003312	-5	-0.509219	0.025959	-0.749451	0.00203	-5	0.026563	0.120789	2e-06	0.071092	1e-06	20	66
Stramenopiles-Chrysophytes_Alveolates-Ciliates	KC583138.1.1098_U	Stramenopiles-Chrysophytes	Chrysophyceae_Clade-H	Eukaryota; Stramenopiles; Ochrophyta; Chrysophyceae; Chrysophyceae_X; Chrysophyceae_Clade-H; Chrysophyceae_Clade-H_X; Chrysophyceae_Clade-H_X_sp.;	JX188331.1.1726_U	Alveolates-Ciliates	Oligohymenophorea	Eukaryota; Alveolata; Ciliophora; Oligohymenophorea; Scuticociliatia; Scuticociliatia-1; Scuticociliatia-1_X; Scuticociliatia-1_X_sp.;	0.692824	0.692824	0.692824	1	1	18	0	0.007	0.657708	0.002209	0.657708	0.002209	0	0.687445	0.001145	0.687445	0.001145	0	0.055193	0.013921	1e-06	0.008438	1e-06	20	69
Stramenopiles-Chrysophytes_Stramenopiles-MAST	KC583138.1.1098_U	Stramenopiles-Chrysophytes	Chrysophyceae_Clade-H	Eukaryota; Stramenopiles; Ochrophyta; Chrysophyceae; Chrysophyceae_X; Chrysophyceae_Clade-H; Chrysophyceae_Clade-H_X; Chrysophyceae_Clade-H_X_sp.;	GQ863785.1.1606_U	Stramenopiles-MAST	MAST-3	Eukaryota; Stramenopiles; Stramenopiles_X; MAST; MAST-3; MAST-3A; MAST-3A_X; MAST-3A_X_sp.;	0.722692	0.722692	0.722692	1	1	18	0	0.003	0.755892	0.000181	0.755892	0.000181	0	0.739438	0.000297	0.739438	0.000297	0	0.033974	0.002574	0	0.003415	0	20	70
Stramenopiles-Chrysophytes_Alveolates-Ciliates	KC583138.1.1098_U	Stramenopiles-Chrysophytes	Chrysophyceae_Clade-H	Eukaryota; Stramenopiles; Ochrophyta; Chrysophyceae; Chrysophyceae_X; Chrysophyceae_Clade-H; Chrysophyceae_Clade-H_X; Chrysophyceae_Clade-H_X_sp.;	KF129779.1.1734_U	Alveolates-Ciliates	Spirotrichea	Eukaryota; Alveolata; Ciliophora; Spirotrichea; Strombidiida; Tontoniidae_A; Spirotontonia; Spirotontonia_sp.;	-0.623076	-0.623076	-0.623076	1	3	14	-2	0.033	0.098762	0.687496	-0.641219	0.005536	-2	0.062335	0.799871	-0.573007	0.016201	-2	0.131118	0.486593	2e-06	0.565448	4e-06	20	72
Stramenopiles-Chrysophytes_Alveolates-Ciliates	KC583138.1.1098_U	Stramenopiles-Chrysophytes	Chrysophyceae_Clade-H	Eukaryota; Stramenopiles; Ochrophyta; Chrysophyceae; Chrysophyceae_X; Chrysophyceae_Clade-H; Chrysophyceae_Clade-H_X; Chrysophyceae_Clade-H_X_sp.;	AY665059.1.1720_U	Alveolates-Ciliates	Oligohymenophorea	Eukaryota; Alveolata; Ciliophora; Oligohymenophorea; Scuticociliatia; Scuticociliatia-1; Scuticociliatia-1_X; Scuticociliatia-1_X_sp.;	0.610262	0.610262	0.610262	2	2	17	0	0.049	0.61215	0.00534	0.61215	0.00534	0	0.645586	0.002832	0.645586	0.002832	0	0.160556	0.024703	2e-06	0.01551	1e-06	20	77
Stramenopiles-Chrysophytes_Rhizaria-Acantharia	KC583138.1.1098_U	Stramenopiles-Chrysophytes	Chrysophyceae_Clade-H	Eukaryota; Stramenopiles; Ochrophyta; Chrysophyceae; Chrysophyceae_X; Chrysophyceae_Clade-H; Chrysophyceae_Clade-H_X; Chrysophyceae_Clade-H_X_sp.;	HM561210.1.973_U	Rhizaria-Acantharia	Acantharea	Eukaryota; Rhizaria; Radiolaria; Acantharea; Acantharea_X; Acantharea_XX; Acantharea_XXX; Acantharea_XXX_sp.;	0.698873	0.698873	0.698873	1	6	14	-5	0.002	0.441959	0.058149	0.73414	0.002794	-5	0.477822	0.038537	0.721673	0.00357	-5	0.026563	0.115996	2e-06	0.093007	2e-06	20	80
Stramenopiles-Chrysophytes_Archaeplastids-Chlorophytes	KC583138.1.1098_U	Stramenopiles-Chrysophytes	Chrysophyceae_Clade-H	Eukaryota; Stramenopiles; Ochrophyta; Chrysophyceae; Chrysophyceae_X; Chrysophyceae_Clade-H; Chrysophyceae_Clade-H_X; Chrysophyceae_Clade-H_X_sp.;	EU143529.1.906_U	Archaeplastids-Chlorophytes	Pyramimonadales	Eukaryota; Archaeplastida; Chlorophyta; Pyramimonadales; Pyramimonadales_X; Pyramimonadales_XX; Pterosperma; Pterosperma_sp.;	-0.704075	-0.704075	-0.704075	1	6	14	-5	0.003	-0.205034	0.39976	-0.72853	0.003125	-5	-0.303603	0.206368	-0.745875	0.002192	-5	0.033974	0.367747	2e-06	0.269853	1e-06	20	84
Stramenopiles-Chrysophytes_Alveolates-Ciliates	KC583138.1.1098_U	Stramenopiles-Chrysophytes	Chrysophyceae_Clade-H	Eukaryota; Stramenopiles; Ochrophyta; Chrysophyceae; Chrysophyceae_X; Chrysophyceae_Clade-H; Chrysophyceae_Clade-H_X; Chrysophyceae_Clade-H_X_sp.;	HQ866199.1.872_U	Alveolates-Ciliates	Spirotrichea	Eukaryota; Alveolata; Ciliophora; Spirotrichea; Strombidiida_F; Strombidiida_F_X; Strombidiida_F_XX; Strombidiida_F_XX_sp.;	-0.65267	-0.65267	-0.65267	1	1	19	0	0.012	-0.622563	0.004416	-0.622563	0.004416	0	-0.647782	0.002709	-0.647782	0.002709	0	0.074959	0.021837	2e-06	0.015104	1e-06	20	88
Stramenopiles-Chrysophytes_Alveolates-Ciliates	KC583138.1.1098_U	Stramenopiles-Chrysophytes	Chrysophyceae_Clade-H	Eukaryota; Stramenopiles; Ochrophyta; Chrysophyceae; Chrysophyceae_X; Chrysophyceae_Clade-H; Chrysophyceae_Clade-H_X; Chrysophyceae_Clade-H_X_sp.;	KJ759492.1.1752_U	Alveolates-Ciliates	Phyllopharyngea	Eukaryota; Alveolata; Ciliophora; Phyllopharyngea; Cyrtophoria; Chlamydodontidae; Chlamydodon; Chlamydodon_sp.;	0.73078	0.73078	0.73078	1	6	14	-5	0.005	0.069181	0.778391	-0.81209	0.000418	5	0.028973	0.906274	-0.823791	0.000292	5	0.0456	0.518622	1e-06	0.599323	0	20	93
Stramenopiles-Chrysophytes_Alveolates-Syndiniales	KC583138.1.1098_U	Stramenopiles-Chrysophytes	Chrysophyceae_Clade-H	Eukaryota; Stramenopiles; Ochrophyta; Chrysophyceae; Chrysophyceae_X; Chrysophyceae_Clade-H; Chrysophyceae_Clade-H_X; Chrysophyceae_Clade-H_X_sp.;	GU820270.1.1197_U	Alveolates-Syndiniales	Dino-Group-I	Eukaryota; Alveolata; Dinophyta; Syndiniales; Dino-Group-I; Dino-Group-I-Clade-6; Dino-Group-I-Clade-6_X; Dino-Group-I-Clade-6_X_sp.;	-0.600729	-0.600729	-0.600729	2	1	17	1	0.043	-0.412667	0.079108	-0.735457	0.000505	1	-0.383568	0.104988	-0.605481	0.007749	1	0.150291	0.140342	1e-06	0.176972	2e-06	20	104
Stramenopiles-Chrysophytes_Alveolates-Ciliates	KC583138.1.1098_U	Stramenopiles-Chrysophytes	Chrysophyceae_Clade-H	Eukaryota; Stramenopiles; Ochrophyta; Chrysophyceae; Chrysophyceae_X; Chrysophyceae_Clade-H; Chrysophyceae_Clade-H_X; Chrysophyceae_Clade-H_X_sp.;	HQ867071.1.870_U	Alveolates-Ciliates	Spirotrichea	Eukaryota; Alveolata; Ciliophora; Spirotrichea; Strombidiida_G; Strombidiida_G_X; Strombidiida_G_XX; Strombidiida_G_XX_sp.;	-0.680726	-0.680726	-0.680726	2	1	14	1	0.012	-0.487289	0.034333	-0.671023	0.002299	1	-0.456302	0.049564	-0.674587	0.002135	1	0.074959	0.08331	1e-06	0.110156	1e-06	20	106
Stramenopiles-Chrysophytes_Stramenopiles-MAST	KC583138.1.1098_U	Stramenopiles-Chrysophytes	Chrysophyceae_Clade-H	Eukaryota; Stramenopiles; Ochrophyta; Chrysophyceae; Chrysophyceae_X; Chrysophyceae_Clade-H; Chrysophyceae_Clade-H_X; Chrysophyceae_Clade-H_X_sp.;	EU499985.1.853_U	Stramenopiles-MAST	MAST-7	Eukaryota; Stramenopiles; Stramenopiles_X; MAST; MAST-7; MAST-7B; MAST-7B_X; MAST-7B_X_sp.;	-0.667847	-0.667847	-0.667847	3	2	16	1	0.012	-0.519194	0.022726	-0.722468	0.000708	1	-0.526778	0.020488	-0.67562	0.002089	1	0.074959	0.063439	1e-06	0.06081	1e-06	20	110
Stramenopiles-Chrysophytes_Alveolates-Dinoflagellates	KC583138.1.1098_U	Stramenopiles-Chrysophytes	Chrysophyceae_Clade-H	Eukaryota; Stramenopiles; Ochrophyta; Chrysophyceae; Chrysophyceae_X; Chrysophyceae_Clade-H; Chrysophyceae_Clade-H_X; Chrysophyceae_Clade-H_X_sp.;	FN690221.1.1692_U	Alveolates-Dinoflagellates	Dinophyceae	Eukaryota; Alveolata; Dinophyta; Dinophyceae; Dinophyceae_X; Dinophyceae_XX; Dinophyceae_XXX; Dinophyceae_XXX_sp.;	-0.628872	-0.628872	-0.628872	2	1	14	1	0.026	-0.421227	0.072481	-0.661226	0.002807	1	-0.526778	0.020488	-0.607438	0.007501	1	0.116273	0.132773	2e-06	0.06081	2e-06	20	118
Stramenopiles-Chrysophytes_Stramenopiles-MAST	KC583138.1.1098_U	Stramenopiles-Chrysophytes	Chrysophyceae_Clade-H	Eukaryota; Stramenopiles; Ochrophyta; Chrysophyceae; Chrysophyceae_X; Chrysophyceae_Clade-H; Chrysophyceae_Clade-H_X; Chrysophyceae_Clade-H_X_sp.;	KC582992.1.1792_U	Stramenopiles-MAST	MAST-3	Eukaryota; Stramenopiles; Stramenopiles_X; MAST; MAST-3; MAST-3L; MAST-3L_X; MAST-3L_X_sp.;	0.777715	0.777715	0.777715	2	2	17	0	0	0.774103	0.0001	0.774103	0.0001	0	0.783048	7.4e-05	0.783048	7.4e-05	0	0	0.001729	0	0.001386	0	20	119
Stramenopiles-Chrysophytes_Stramenopiles-Other	KC583138.1.1098_U	Stramenopiles-Chrysophytes	Chrysophyceae_Clade-H	Eukaryota; Stramenopiles; Ochrophyta; Chrysophyceae; Chrysophyceae_X; Chrysophyceae_Clade-H; Chrysophyceae_Clade-H_X; Chrysophyceae_Clade-H_X_sp.;	EF695169.1.817_U	Stramenopiles-Other	Florenciellales	Eukaryota; Stramenopiles; Ochrophyta; Dictyochophyceae; Dictyochophyceae_X; Florenciellales; Florenciellales_X; Florenciellales_X_sp.;	-0.642651	-0.642651	-0.642651	1	6	14	-5	0.019	-0.309087	0.197878	-0.767953	0.001338	-5	-0.361001	0.128892	-0.740659	0.002445	-5	0.097312	0.24591	1e-06	0.201874	1e-06	20	121
Stramenopiles-Chrysophytes_Haptophytes	KC583138.1.1098_U	Stramenopiles-Chrysophytes	Chrysophyceae_Clade-H	Eukaryota; Stramenopiles; Ochrophyta; Chrysophyceae; Chrysophyceae_X; Chrysophyceae_Clade-H; Chrysophyceae_Clade-H_X; Chrysophyceae_Clade-H_X_sp.;	HG970975	Haptophytes	Haptophyta	Eukaryota; Hacrobia; Haptophyta; Haptophyta_X; Haptophyta_XX; Haptophyta_XXX; Haptophyta_XXXX; Haptophyta_XXXX_sp.;	-0.661358	-0.661358	-0.661358	2	2	17	0	0.006	-0.514508	0.024203	-0.688379	0.006489	-5	-0.562143	0.012241	-0.643956	0.012942	-5	0.050667	0.06623	2e-06	0.042781	3e-06	20	126
Stramenopiles-Chrysophytes_Cryptophytes	KC583138.1.1098_U	Stramenopiles-Chrysophytes	Chrysophyceae_Clade-H	Eukaryota; Stramenopiles; Ochrophyta; Chrysophyceae; Chrysophyceae_X; Chrysophyceae_Clade-H; Chrysophyceae_Clade-H_X; Chrysophyceae_Clade-H_X_sp.;	GQ863814.1.1651_U	Cryptophytes	Other-unclassified	Eukaryota; Hacrobia; Cryptophyta; Cryptophyceae; Cryptophyceae_X; Goniomonadales; Goniomonas; Goniomonas_sp.;	-0.624929	-0.624929	-0.624929	1	1	18	0	0.025	-0.636081	0.003416	-0.636081	0.003416	0	-0.570927	0.010678	-0.657143	0.010662	-5	0.113584	0.018396	2e-06	0.038847	3e-06	20	146
Stramenopiles-Chrysophytes_Stramenopiles-MAST	KC583138.1.1098_U	Stramenopiles-Chrysophytes	Chrysophyceae_Clade-H	Eukaryota; Stramenopiles; Ochrophyta; Chrysophyceae; Chrysophyceae_X; Chrysophyceae_Clade-H; Chrysophyceae_Clade-H_X; Chrysophyceae_Clade-H_X_sp.;	AJ402350.1.1758_U	Stramenopiles-MAST	MAST-1	Eukaryota; Stramenopiles; Stramenopiles_X; MAST; MAST-1; MAST-1D; MAST-1D_X; MAST-1D_X_sp.;	-0.66408	-0.66408	-0.66408	2	2	17	0	0.015	-0.59964	0.006653	-0.59964	0.006653	0	-0.631533	0.003729	-0.631533	0.003729	0	0.085181	0.02845	2e-06	0.01866	2e-06	20	150
Stramenopiles-Chrysophytes_DO	KC583138.1.1098_U	Stramenopiles-Chrysophytes	Chrysophyceae_Clade-H	Eukaryota; Stramenopiles; Ochrophyta; Chrysophyceae; Chrysophyceae_X; Chrysophyceae_Clade-H; Chrysophyceae_Clade-H_X; Chrysophyceae_Clade-H_X_sp.;	DO	DO	NA	NA	-0.712585	-0.712585	-0.712585	1	1	18	0	0.007	-0.629259	0.003894	-0.629259	0.003894	0	-0.646181	0.002798	-0.646181	0.002798	0	0.055193	0.020216	2e-06	0.015412	1e-06	20	204
Alveolates-Dinoflagellates_Alveolates-Dinoflagellates	EU371356.1.1766_U	Alveolates-Dinoflagellates	Chytriodinium	Eukaryota; Alveolata; Dinophyta; Dinophyceae; Dinophyceae_X; Dinophyceae_XX; Chytriodinium; Chytriodinium_roseum;	EU087269.1.895_U	Alveolates-Dinoflagellates	Pfiesteriaceae	Eukaryota; Alveolata; Dinophyta; Dinophyceae; Dinophyceae_X; Pfiesteriaceae; Pfiesteriaceae_X; Pfiesteriaceae_X_sp.;	0.64461	0.64461	0.64461	2	2	17	0	0.02	0.679138	0.001385	0.679138	0.001385	0	0.605529	0.006006	0.605529	0.006006	0	0.100183	0.010153	1e-06	0.025892	2e-06	21	22
Alveolates-Dinoflagellates_Alveolates-Syndiniales	EU371356.1.1766_U	Alveolates-Dinoflagellates	Chytriodinium	Eukaryota; Alveolata; Dinophyta; Dinophyceae; Dinophyceae_X; Dinophyceae_XX; Chytriodinium; Chytriodinium_roseum;	FJ431723.1.830_U	Alveolates-Syndiniales	Dino-Group-III	Eukaryota; Alveolata; Dinophyta; Syndiniales; Dino-Group-III; Dino-Group-III_X; Dino-Group-III_XX; Dino-Group-III_XX_sp.;	0.720378	0.720378	0.720378	1	1	19	0	0.002	0.746959	0.000238	0.746959	0.000238	0	0.708516	0.000685	0.708516	0.000685	0	0.026563	0.003099	0	0.005929	1e-06	21	27
Alveolates-Dinoflagellates_Stramenopiles-MAST	EU371356.1.1766_U	Alveolates-Dinoflagellates	Chytriodinium	Eukaryota; Alveolata; Dinophyta; Dinophyceae; Dinophyceae_X; Dinophyceae_XX; Chytriodinium; Chytriodinium_roseum;	JQ781989.1.1805_U	Stramenopiles-MAST	MAST-4	Eukaryota; Stramenopiles; Stramenopiles_X; MAST; MAST-4; MAST-4A; MAST-4A_X; MAST-4A_X_sp.;	0.639311	0.639311	0.639311	1	1	16	0	0.015	0.544823	0.015859	0.544823	0.015859	0	0.608428	0.005706	0.608428	0.005706	0	0.085181	0.049719	3e-06	0.025072	2e-06	21	31
Alveolates-Dinoflagellates_Alveolates-Dinoflagellates	EU371356.1.1766_U	Alveolates-Dinoflagellates	Chytriodinium	Eukaryota; Alveolata; Dinophyta; Dinophyceae; Dinophyceae_X; Dinophyceae_XX; Chytriodinium; Chytriodinium_roseum;	GU825315.1.1202_U	Alveolates-Dinoflagellates	Dinophyceae	Eukaryota; Alveolata; Dinophyta; Dinophyceae; Dinophyceae_X; Dinophyceae_XX; Dinophyceae_XXX; Dinophyceae_XXX_sp.;	0.645493	0.645493	0.645493	1	1	19	0	0.009	0.723136	0.000468	0.723136	0.000468	0	0.643265	0.002966	0.643265	0.002966	0	0.063892	0.004881	1e-06	0.016063	2e-06	21	32
Alveolates-Dinoflagellates_Alveolates-Dinoflagellates	EU371356.1.1766_U	Alveolates-Dinoflagellates	Chytriodinium	Eukaryota; Alveolata; Dinophyta; Dinophyceae; Dinophyceae_X; Dinophyceae_XX; Chytriodinium; Chytriodinium_roseum;	KF129831.1.1758_U	Alveolates-Dinoflagellates	Dinophyceae	Eukaryota; Alveolata; Dinophyta; Dinophyceae; Dinophyceae_X; Dinophyceae_XX; Dinophyceae_XXX; Dinophyceae_XXX_sp.;	0.629355	0.629355	0.629355	1	1	19	0	0.033	0.590731	0.007741	0.590731	0.007741	0	0.66577	0.001861	0.66577	0.001861	0	0.131118	0.031588	2e-06	0.011635	1e-06	21	40
Alveolates-Dinoflagellates_Alveolates-Dinoflagellates	EU371356.1.1766_U	Alveolates-Dinoflagellates	Chytriodinium	Eukaryota; Alveolata; Dinophyta; Dinophyceae; Dinophyceae_X; Dinophyceae_XX; Chytriodinium; Chytriodinium_roseum;	FJ217814.1.1521_U	Alveolates-Dinoflagellates	Azadinium	Eukaryota; Alveolata; Dinophyta; Dinophyceae; Dinophyceae_X; Dinophyceae_XX; Azadinium; Azadinium_spinosum;	0.801315	0.801315	0.801315	1	1	18	0	0	0.805151	3.2e-05	0.805151	3.2e-05	0	0.796313	4.5e-05	0.796313	4.5e-05	0	0	0.000778	0	0.001009	0	21	43
Alveolates-Dinoflagellates_Alveolates-Dinoflagellates	EU371356.1.1766_U	Alveolates-Dinoflagellates	Chytriodinium	Eukaryota; Alveolata; Dinophyta; Dinophyceae; Dinophyceae_X; Dinophyceae_XX; Chytriodinium; Chytriodinium_roseum;	HM581705.1.1793_U	Alveolates-Dinoflagellates	Dinophyceae	Eukaryota; Alveolata; Dinophyta; Dinophyceae; Dinophyceae_X; Dinophyceae_XX; Dinophyceae_XXX; Dinophyceae_XXX_sp.;	0.825829	0.825829	0.825829	1	1	19	0	0	0.826042	1.3e-05	0.826042	1.3e-05	0	0.796313	4.5e-05	0.796313	4.5e-05	0	0	0.000424	0	0.001009	0	21	55
Alveolates-Dinoflagellates_Stramenopiles-MAST	EU371356.1.1766_U	Alveolates-Dinoflagellates	Chytriodinium	Eukaryota; Alveolata; Dinophyta; Dinophyceae; Dinophyceae_X; Dinophyceae_XX; Chytriodinium; Chytriodinium_roseum;	GU823216.1.1365_U	Stramenopiles-MAST	MAST-3	Eukaryota; Stramenopiles; Stramenopiles_X; MAST; MAST-3; MAST-3I; MAST-3I_X; MAST-3I_X_sp.;	-0.691029	-0.691029	-0.691029	1	1	18	0	0.005	-0.653404	0.002415	-0.653404	0.002415	0	-0.652918	0.00244	-0.652918	0.00244	0	0.0456	0.014695	1e-06	0.01414	1e-06	21	61
Alveolates-Dinoflagellates_Alveolates-Dinoflagellates	EU371356.1.1766_U	Alveolates-Dinoflagellates	Chytriodinium	Eukaryota; Alveolata; Dinophyta; Dinophyceae; Dinophyceae_X; Dinophyceae_XX; Chytriodinium; Chytriodinium_roseum;	EU500118.1.810_U	Alveolates-Dinoflagellates	Gymnodinium	Eukaryota; Alveolata; Dinophyta; Dinophyceae; Dinophyceae_X; Dinophyceae_XX; Gymnodinium; Gymnodinium_sp.;	0.62954	0.62954	0.62954	1	1	18	0	0.019	0.707174	0.000709	0.707174	0.000709	0	0.595259	0.007171	0.595259	0.007171	0	0.097312	0.006413	1e-06	0.029294	2e-06	21	67
Alveolates-Dinoflagellates_Alveolates-Dinoflagellates	EU371356.1.1766_U	Alveolates-Dinoflagellates	Chytriodinium	Eukaryota; Alveolata; Dinophyta; Dinophyceae; Dinophyceae_X; Dinophyceae_XX; Chytriodinium; Chytriodinium_roseum;	EU780629.1.1715_U	Alveolates-Dinoflagellates	Dinophyceae	Eukaryota; Alveolata; Dinophyta; Dinophyceae; Dinophyceae_X; Dinophyceae_XX; Dinophyceae_XXX; Dinophyceae_XXX_sp.;	0.603917	0.603917	0.603917	1	1	19	0	0.039	0.655692	0.002304	0.655692	0.002304	0	0.618692	0.004743	0.618692	0.004743	0	0.143381	0.014295	1e-06	0.021841	2e-06	21	73
Alveolates-Dinoflagellates_Alveolates-Ciliates	EU371356.1.1766_U	Alveolates-Dinoflagellates	Chytriodinium	Eukaryota; Alveolata; Dinophyta; Dinophyceae; Dinophyceae_X; Dinophyceae_XX; Chytriodinium; Chytriodinium_roseum;	HQ866199.1.872_U	Alveolates-Ciliates	Spirotrichea	Eukaryota; Alveolata; Ciliophora; Spirotrichea; Strombidiida_F; Strombidiida_F_X; Strombidiida_F_XX; Strombidiida_F_XX_sp.;	0.661894	0.661894	0.661894	1	1	19	0	0.01	0.596437	0.007029	0.596437	0.007029	0	0.626427	0.004108	-0.743558	0.000623	2	0.067958	0.02959	2e-06	0.019912	1e-06	21	88
Alveolates-Dinoflagellates_Alveolates-Syndiniales	EU371356.1.1766_U	Alveolates-Dinoflagellates	Chytriodinium	Eukaryota; Alveolata; Dinophyta; Dinophyceae; Dinophyceae_X; Dinophyceae_XX; Chytriodinium; Chytriodinium_roseum;	EU780604.1.1660_U	Alveolates-Syndiniales	Dino-Group-III	Eukaryota; Alveolata; Dinophyta; Syndiniales; Dino-Group-III; Dino-Group-III_X; Dino-Group-III_XX; Dino-Group-III_XX_sp.;	0.674721	0.674721	0.674721	1	1	18	0	0.013	0.672182	0.001618	0.672182	0.001618	0	0.729587	0.000392	0.729587	0.000392	0	0.078309	0.011246	1e-06	0.004086	0	21	103
Alveolates-Dinoflagellates_Alveolates-Ciliates	EU371356.1.1766_U	Alveolates-Dinoflagellates	Chytriodinium	Eukaryota; Alveolata; Dinophyta; Dinophyceae; Dinophyceae_X; Dinophyceae_XX; Chytriodinium; Chytriodinium_roseum;	HQ867071.1.870_U	Alveolates-Ciliates	Spirotrichea	Eukaryota; Alveolata; Ciliophora; Spirotrichea; Strombidiida_G; Strombidiida_G_X; Strombidiida_G_XX; Strombidiida_G_XX_sp.;	0.603458	0.603458	0.603458	3	3	16	0	0.044	0.618463	0.004763	0.618463	0.004763	0	0.492537	0.032161	0.492537	0.032161	0	0.151655	0.022934	2e-06	0.082503	5e-06	21	106
Alveolates-Dinoflagellates_Stramenopiles-Diatoms	EU371356.1.1766_U	Alveolates-Dinoflagellates	Chytriodinium	Eukaryota; Alveolata; Dinophyta; Dinophyceae; Dinophyceae_X; Dinophyceae_XX; Chytriodinium; Chytriodinium_roseum;	AY256270.1.1308_U	Stramenopiles-Diatoms	Araphid-pennate	Eukaryota; Stramenopiles; Ochrophyta; Bacillariophyta; Bacillariophyta_X; Araphid-pennate; Araphid-pennate_X; Araphid-pennate_X_sp.;	0.730857	0.730857	0.730857	1	1	18	0	0.001	0.695507	0.000945	0.695507	0.000945	0	0.745064	0.000252	0.745064	0.000252	0	0.017494	0.00772	1e-06	0.003067	0	21	112
Alveolates-Dinoflagellates_Alveolates-Dinoflagellates	EU371356.1.1766_U	Alveolates-Dinoflagellates	Chytriodinium	Eukaryota; Alveolata; Dinophyta; Dinophyceae; Dinophyceae_X; Dinophyceae_XX; Chytriodinium; Chytriodinium_roseum;	KJ759269.1.1802_U	Alveolates-Dinoflagellates	Dinophyceae	Eukaryota; Alveolata; Dinophyta; Dinophyceae; Dinophyceae_X; Dinophyceae_XX; Dinophyceae_XXX; Dinophyceae_XXX_sp.;	0.796988	0.796988	0.796988	1	1	18	0	0	0.766866	0.000128	0.766866	0.000128	0	0.784805	6.9e-05	0.784805	6.9e-05	0	0	0.002059	0	0.001334	0	21	116
Alveolates-Dinoflagellates_Alveolates-Dinoflagellates	EU371356.1.1766_U	Alveolates-Dinoflagellates	Chytriodinium	Eukaryota; Alveolata; Dinophyta; Dinophyceae; Dinophyceae_X; Dinophyceae_XX; Chytriodinium; Chytriodinium_roseum;	AY664894.1.1756_U	Alveolates-Dinoflagellates	Dinophyceae	Eukaryota; Alveolata; Dinophyta; Dinophyceae; Dinophyceae_X; Dinophyceae_XX; Dinophyceae_XXX; Dinophyceae_XXX_sp.;	0.652798	0.652798	0.652798	1	1	16	0	0.015	0.702147	0.000804	0.702147	0.000804	0	0.630979	0.003769	0.630979	0.003769	0	0.085181	0.006911	1e-06	0.018788	2e-06	21	117
Alveolates-Dinoflagellates_Alveolates-Ciliates	EU371356.1.1766_U	Alveolates-Dinoflagellates	Chytriodinium	Eukaryota; Alveolata; Dinophyta; Dinophyceae; Dinophyceae_X; Dinophyceae_XX; Chytriodinium; Chytriodinium_roseum;	FJ422993.1.1778_U	Alveolates-Ciliates	Spirotrichea	Eukaryota; Alveolata; Ciliophora; Spirotrichea; Strombidiida; Tontoniidae_B; Pseudotontonia; Pseudotontonia_simplicidens;	0.632928	0.632928	0.632928	1	1	19	0	0.025	0.58311	0.008781	0.58311	0.008781	0	0.643265	0.002966	0.643265	0.002966	0	0.113584	0.034321	3e-06	0.016063	2e-06	21	129
Alveolates-Dinoflagellates_Alveolates-Syndiniales	EU371356.1.1766_U	Alveolates-Dinoflagellates	Chytriodinium	Eukaryota; Alveolata; Dinophyta; Dinophyceae; Dinophyceae_X; Dinophyceae_XX; Chytriodinium; Chytriodinium_roseum;	HQ870498.1.849_U	Alveolates-Syndiniales	Dino-Group-III	Eukaryota; Alveolata; Dinophyta; Syndiniales; Dino-Group-III; Dino-Group-III_X; Dino-Group-III_XX; Dino-Group-III_XX_sp.;	0.598476	0.598476	0.598476	2	2	18	0	0.04	0.595554	0.007136	0.595554	0.007136	0	0.517803	0.023157	0.517803	0.023157	0	0.145146	0.029903	2e-06	0.06587	4e-06	21	132
Alveolates-Dinoflagellates_Alveolates-Ciliates	EU087269.1.895_U	Alveolates-Dinoflagellates	Pfiesteriaceae	Eukaryota; Alveolata; Dinophyta; Dinophyceae; Dinophyceae_X; Pfiesteriaceae; Pfiesteriaceae_X; Pfiesteriaceae_X_sp.;	KJ759341.1.1721_U	Alveolates-Ciliates	Phyllopharyngea	Eukaryota; Alveolata; Ciliophora; Phyllopharyngea; Cyrtophoria; Chlamydodontidae; Chlamydodon; Chlamydodon_sp.;	-0.659405	-0.659405	-0.659405	6	6	14	0	0.022	-0.661726	0.002029	-0.661726	0.002029	0	-0.588855	0.007987	-0.588855	0.007987	0	0.106234	0.013199	1e-06	0.031598	3e-06	22	24
Alveolates-Dinoflagellates_Alveolates-Ciliates	EU087269.1.895_U	Alveolates-Dinoflagellates	Pfiesteriaceae	Eukaryota; Alveolata; Dinophyta; Dinophyceae; Dinophyceae_X; Pfiesteriaceae; Pfiesteriaceae_X; Pfiesteriaceae_X_sp.;	GU819492.1.1175_U	Alveolates-Ciliates	Spirotrichea	Eukaryota; Alveolata; Ciliophora; Spirotrichea; Strombidiida; Strombidiidae_J; Strombidiidae_J_X; Strombidiidae_J_X_sp.;	-0.720499	-0.720499	-0.720499	3	3	17	0	0.004	-0.680994	0.001328	-0.680994	0.001328	0	-0.676613	0.001466	-0.676613	0.001466	0	0.040295	0.009861	1e-06	0.009932	1e-06	22	25
Alveolates-Dinoflagellates_Alveolates-Syndiniales	EU087269.1.895_U	Alveolates-Dinoflagellates	Pfiesteriaceae	Eukaryota; Alveolata; Dinophyta; Dinophyceae; Dinophyceae_X; Pfiesteriaceae; Pfiesteriaceae_X; Pfiesteriaceae_X_sp.;	FJ431723.1.830_U	Alveolates-Syndiniales	Dino-Group-III	Eukaryota; Alveolata; Dinophyta; Syndiniales; Dino-Group-III; Dino-Group-III_X; Dino-Group-III_XX; Dino-Group-III_XX_sp.;	0.714631	0.714631	0.714631	3	3	16	0	0.004	0.739917	0.000293	0.739917	0.000293	0	0.712593	0.000618	0.712593	0.000618	0	0.040295	0.003596	0	0.005531	1e-06	22	27
Alveolates-Dinoflagellates_Alveolates-Dinoflagellates	EU087269.1.895_U	Alveolates-Dinoflagellates	Pfiesteriaceae	Eukaryota; Alveolata; Dinophyta; Dinophyceae; Dinophyceae_X; Pfiesteriaceae; Pfiesteriaceae_X; Pfiesteriaceae_X_sp.;	GU825315.1.1202_U	Alveolates-Dinoflagellates	Dinophyceae	Eukaryota; Alveolata; Dinophyta; Dinophyceae; Dinophyceae_X; Dinophyceae_XX; Dinophyceae_XXX; Dinophyceae_XXX_sp.;	0.886275	0.886275	0.886275	2	2	17	0	0	0.917796	0	0.917796	0	0	0.915789	0	0.915789	0	0	0	1.2e-05	0	1.4e-05	0	22	32
Alveolates-Dinoflagellates_Alveolates-Ciliates	EU087269.1.895_U	Alveolates-Dinoflagellates	Pfiesteriaceae	Eukaryota; Alveolata; Dinophyta; Dinophyceae; Dinophyceae_X; Pfiesteriaceae; Pfiesteriaceae_X; Pfiesteriaceae_X_sp.;	KY290313.1.1621_U	Alveolates-Ciliates	Spirotrichea	Eukaryota; Alveolata; Ciliophora; Spirotrichea; Choreotrichida; Leegaardiellidae_B; Leegaardiella; Leegaardiella_sp.;	-0.764387	-0.764387	-0.764387	2	2	17	0	0	-0.712778	0.000615	-0.712778	0.000615	0	-0.807203	2.9e-05	-0.807203	2.9e-05	0	0	0.005788	1e-06	0.000765	0	22	36
Alveolates-Dinoflagellates_Stramenopiles-MAST	EU087269.1.895_U	Alveolates-Dinoflagellates	Pfiesteriaceae	Eukaryota; Alveolata; Dinophyta; Dinophyceae; Dinophyceae_X; Pfiesteriaceae; Pfiesteriaceae_X; Pfiesteriaceae_X_sp.;	JQ782004.1.1784_U	Stramenopiles-MAST	MAST-1	Eukaryota; Stramenopiles; Stramenopiles_X; MAST; MAST-1; MAST-1C; MAST-1C_X; MAST-1C_X_sp.;	0.610963	0.610963	0.610963	3	3	17	0	0.043	0.619518	0.004671	0.619518	0.004671	0	0.568042	0.011173	0.599725	0.030266	6	0.150291	0.022687	2e-06	0.04017	5e-06	22	37
Alveolates-Dinoflagellates_Stramenopiles-MAST	EU087269.1.895_U	Alveolates-Dinoflagellates	Pfiesteriaceae	Eukaryota; Alveolata; Dinophyta; Dinophyceae; Dinophyceae_X; Pfiesteriaceae; Pfiesteriaceae_X; Pfiesteriaceae_X_sp.;	KF129967.1.1739_U	Stramenopiles-MAST	MAST-9	Eukaryota; Stramenopiles; Stramenopiles_X; MAST; MAST-9; MAST-9A; MAST-9A_X; MAST-9A_X_sp.;	-0.743293	-0.743293	-0.743293	3	3	17	0	0.003	-0.799224	4e-05	-0.799224	4e-05	0	-0.830189	1.1e-05	-0.830189	1.1e-05	0	0.033974	0.000935	0	0.00042	0	22	38
Alveolates-Dinoflagellates_Stramenopiles-MAST	EU087269.1.895_U	Alveolates-Dinoflagellates	Pfiesteriaceae	Eukaryota; Alveolata; Dinophyta; Dinophyceae; Dinophyceae_X; Pfiesteriaceae; Pfiesteriaceae_X; Pfiesteriaceae_X_sp.;	HM163291.1.1682_U	Stramenopiles-MAST	MAST-3	Eukaryota; Stramenopiles; Stramenopiles_X; MAST; MAST-3; MAST-3I; MAST-3I_X; MAST-3I_X_sp.;	-0.635766	-0.635766	-0.635766	2	2	16	0	0.03	-0.66154	0.002037	-0.66154	0.002037	0	-0.633333	0.003603	-0.633333	0.003603	0	0.125466	0.013215	1e-06	0.0183	2e-06	22	39
Alveolates-Dinoflagellates_Alveolates-Dinoflagellates	EU087269.1.895_U	Alveolates-Dinoflagellates	Pfiesteriaceae	Eukaryota; Alveolata; Dinophyta; Dinophyceae; Dinophyceae_X; Pfiesteriaceae; Pfiesteriaceae_X; Pfiesteriaceae_X_sp.;	KF129831.1.1758_U	Alveolates-Dinoflagellates	Dinophyceae	Eukaryota; Alveolata; Dinophyta; Dinophyceae; Dinophyceae_X; Dinophyceae_XX; Dinophyceae_XXX; Dinophyceae_XXX_sp.;	0.783622	0.783622	0.783622	2	2	17	0	0	0.756814	0.000176	0.756814	0.000176	0	0.80939	2.7e-05	0.80939	2.7e-05	0	0	0.002523	0	0.000717	0	22	40
Alveolates-Dinoflagellates_Alveolates-Dinoflagellates	EU087269.1.895_U	Alveolates-Dinoflagellates	Pfiesteriaceae	Eukaryota; Alveolata; Dinophyta; Dinophyceae; Dinophyceae_X; Pfiesteriaceae; Pfiesteriaceae_X; Pfiesteriaceae_X_sp.;	FJ217814.1.1521_U	Alveolates-Dinoflagellates	Azadinium	Eukaryota; Alveolata; Dinophyta; Dinophyceae; Dinophyceae_X; Dinophyceae_XX; Azadinium; Azadinium_spinosum;	0.803158	0.803158	0.803158	2	2	18	0	0.001	0.819216	1.8e-05	0.819216	1.8e-05	0	0.802106	3.6e-05	0.802106	3.6e-05	0	0.017494	0.000524	0	0.000888	0	22	43
Alveolates-Dinoflagellates_Alveolates-Dinoflagellates	EU087269.1.895_U	Alveolates-Dinoflagellates	Pfiesteriaceae	Eukaryota; Alveolata; Dinophyta; Dinophyceae; Dinophyceae_X; Pfiesteriaceae; Pfiesteriaceae_X; Pfiesteriaceae_X_sp.;	AF274249.1.1756_U	Alveolates-Dinoflagellates	Adenoides	Eukaryota; Alveolata; Dinophyta; Dinophyceae; Dinophyceae_X; Dinophyceae_XX; Adenoides; Adenoides_eludens;	0.616914	0.616914	0.616914	1	1	15	0	0.049	0.539037	0.017242	0.539037	0.017242	0	0.579201	0.009358	-0.675468	0.008022	5	0.160556	0.052532	4e-06	0.03533	3e-06	22	45
Alveolates-Dinoflagellates_Alveolates-Dinoflagellates	EU087269.1.895_U	Alveolates-Dinoflagellates	Pfiesteriaceae	Eukaryota; Alveolata; Dinophyta; Dinophyceae; Dinophyceae_X; Pfiesteriaceae; Pfiesteriaceae_X; Pfiesteriaceae_X_sp.;	HM581705.1.1793_U	Alveolates-Dinoflagellates	Dinophyceae	Eukaryota; Alveolata; Dinophyta; Dinophyceae; Dinophyceae_X; Dinophyceae_XX; Dinophyceae_XXX; Dinophyceae_XXX_sp.;	0.629376	0.629376	0.629376	3	3	16	0	0.027	0.535972	0.018012	0.535972	0.018012	0	0.621325	0.004518	0.621325	0.004518	0	0.118689	0.054157	4e-06	0.021211	2e-06	22	55
Alveolates-Dinoflagellates_Stramenopiles-MAST	EU087269.1.895_U	Alveolates-Dinoflagellates	Pfiesteriaceae	Eukaryota; Alveolata; Dinophyta; Dinophyceae; Dinophyceae_X; Pfiesteriaceae; Pfiesteriaceae_X; Pfiesteriaceae_X_sp.;	GU823216.1.1365_U	Stramenopiles-MAST	MAST-3	Eukaryota; Stramenopiles; Stramenopiles_X; MAST; MAST-3; MAST-3I; MAST-3I_X; MAST-3I_X_sp.;	-0.746873	-0.746873	-0.746873	2	2	18	0	0	-0.722591	0.000475	-0.722591	0.000475	0	-0.750877	0.000212	-0.750877	0.000212	0	0	0.004927	1e-06	0.00274	0	22	61
Alveolates-Dinoflagellates_Stramenopiles-MAST	EU087269.1.895_U	Alveolates-Dinoflagellates	Pfiesteriaceae	Eukaryota; Alveolata; Dinophyta; Dinophyceae; Dinophyceae_X; Pfiesteriaceae; Pfiesteriaceae_X; Pfiesteriaceae_X_sp.;	AJ402357.1.1758_U	Stramenopiles-MAST	MAST-3	Eukaryota; Stramenopiles; Stramenopiles_X; MAST; MAST-3; MAST-3A; MAST-3A_X; MAST-3A_X_sp.;	-0.692736	-0.692736	-0.692736	1	1	19	0	0.01	-0.720248	0.000505	-0.720248	0.000505	0	-0.749452	0.000221	-0.749452	0.000221	0	0.067958	0.005082	1e-06	0.002807	0	22	63
Alveolates-Dinoflagellates_Alveolates-Dinoflagellates	EU087269.1.895_U	Alveolates-Dinoflagellates	Pfiesteriaceae	Eukaryota; Alveolata; Dinophyta; Dinophyceae; Dinophyceae_X; Pfiesteriaceae; Pfiesteriaceae_X; Pfiesteriaceae_X_sp.;	HE611580.1.1746_U	Alveolates-Dinoflagellates	Gyrodinium	Eukaryota; Alveolata; Dinophyta; Dinophyceae; Dinophyceae_X; Dinophyceae_XX; Gyrodinium; Gyrodinium_sp.;	0.789316	0.789316	0.789316	1	1	19	0	0	0.886309	0	0.886309	0	0	0.860026	2e-06	0.860026	2e-06	0	0	5.6e-05	0	0.000162	0	22	65
Alveolates-Dinoflagellates_Alveolates-Dinoflagellates	EU087269.1.895_U	Alveolates-Dinoflagellates	Pfiesteriaceae	Eukaryota; Alveolata; Dinophyta; Dinophyceae; Dinophyceae_X; Pfiesteriaceae; Pfiesteriaceae_X; Pfiesteriaceae_X_sp.;	HM581766.1.1782_U	Alveolates-Dinoflagellates	Prorocentrum	Eukaryota; Alveolata; Dinophyta; Dinophyceae; Dinophyceae_X; Dinophyceae_XX; Prorocentrum; Prorocentrum_sp.;	0.795613	0.795613	0.795613	3	3	17	0	0	0.721308	0.000491	0.721308	0.000491	0	0.726316	0.000429	0.726316	0.000429	0	0	0.004998	1e-06	0.004314	1e-06	22	66
Alveolates-Dinoflagellates_Alveolates-Ciliates	EU087269.1.895_U	Alveolates-Dinoflagellates	Pfiesteriaceae	Eukaryota; Alveolata; Dinophyta; Dinophyceae; Dinophyceae_X; Pfiesteriaceae; Pfiesteriaceae_X; Pfiesteriaceae_X_sp.;	JX188331.1.1726_U	Alveolates-Ciliates	Oligohymenophorea	Eukaryota; Alveolata; Ciliophora; Oligohymenophorea; Scuticociliatia; Scuticociliatia-1; Scuticociliatia-1_X; Scuticociliatia-1_X_sp.;	-0.61891	-0.61891	-0.61891	3	3	17	0	0.045	-0.737767	0.000312	-0.737767	0.000312	0	-0.694737	0.000963	-0.694737	0.000963	0	0.153058	0.003755	0	0.007493	1e-06	22	69
Alveolates-Dinoflagellates_Alveolates-Ciliates	EU087269.1.895_U	Alveolates-Dinoflagellates	Pfiesteriaceae	Eukaryota; Alveolata; Dinophyta; Dinophyceae; Dinophyceae_X; Pfiesteriaceae; Pfiesteriaceae_X; Pfiesteriaceae_X_sp.;	AY665059.1.1720_U	Alveolates-Ciliates	Oligohymenophorea	Eukaryota; Alveolata; Ciliophora; Oligohymenophorea; Scuticociliatia; Scuticociliatia-1; Scuticociliatia-1_X; Scuticociliatia-1_X_sp.;	-0.657465	-0.657465	-0.657465	3	3	17	0	0.016	-0.675154	0.001515	-0.675154	0.001515	0	-0.726635	0.000426	-0.726635	0.000426	0	0.088365	0.010757	1e-06	0.004292	1e-06	22	77
Alveolates-Dinoflagellates_Rhizaria-Acantharia	EU087269.1.895_U	Alveolates-Dinoflagellates	Pfiesteriaceae	Eukaryota; Alveolata; Dinophyta; Dinophyceae; Dinophyceae_X; Pfiesteriaceae; Pfiesteriaceae_X; Pfiesteriaceae_X_sp.;	HM561210.1.973_U	Rhizaria-Acantharia	Acantharea	Eukaryota; Rhizaria; Radiolaria; Acantharea; Acantharea_X; Acantharea_XX; Acantharea_XXX; Acantharea_XXX_sp.;	-0.779267	-0.779267	-0.779267	3	3	17	0	0	-0.819039	1.8e-05	-0.819039	1.8e-05	0	-0.81527	2.1e-05	-0.81527	2.1e-05	0	0	0.000527	0	0.000608	0	22	80
Alveolates-Dinoflagellates_Archaeplastids-Chlorophytes	EU087269.1.895_U	Alveolates-Dinoflagellates	Pfiesteriaceae	Eukaryota; Alveolata; Dinophyta; Dinophyceae; Dinophyceae_X; Pfiesteriaceae; Pfiesteriaceae_X; Pfiesteriaceae_X_sp.;	EU143529.1.906_U	Archaeplastids-Chlorophytes	Pyramimonadales	Eukaryota; Archaeplastida; Chlorophyta; Pyramimonadales; Pyramimonadales_X; Pyramimonadales_XX; Pterosperma; Pterosperma_sp.;	0.758067	0.758067	0.758067	3	3	17	0	0.001	0.799225	4e-05	0.799225	4e-05	0	0.723442	0.000464	0.723442	0.000464	0	0.017494	0.000935	0	0.004543	1e-06	22	84
Alveolates-Dinoflagellates_Alveolates-Ciliates	EU087269.1.895_U	Alveolates-Dinoflagellates	Pfiesteriaceae	Eukaryota; Alveolata; Dinophyta; Dinophyceae; Dinophyceae_X; Pfiesteriaceae; Pfiesteriaceae_X; Pfiesteriaceae_X_sp.;	HQ866199.1.872_U	Alveolates-Ciliates	Spirotrichea	Eukaryota; Alveolata; Ciliophora; Spirotrichea; Strombidiida_F; Strombidiida_F_X; Strombidiida_F_XX; Strombidiida_F_XX_sp.;	0.638178	0.638178	0.638178	2	2	17	0	0.026	0.556912	0.013255	0.556912	0.013255	0	0.627468	0.004029	0.627468	0.004029	0	0.116273	0.044366	3e-06	0.01962	2e-06	22	88
Alveolates-Dinoflagellates_Alveolates-Ciliates	EU087269.1.895_U	Alveolates-Dinoflagellates	Pfiesteriaceae	Eukaryota; Alveolata; Dinophyta; Dinophyceae; Dinophyceae_X; Pfiesteriaceae; Pfiesteriaceae_X; Pfiesteriaceae_X_sp.;	KJ759492.1.1752_U	Alveolates-Ciliates	Phyllopharyngea	Eukaryota; Alveolata; Ciliophora; Phyllopharyngea; Cyrtophoria; Chlamydodontidae; Chlamydodon; Chlamydodon_sp.;	-0.723467	-0.723467	-0.723467	5	5	15	0	0.005	-0.665874	0.001857	-0.665874	0.001857	0	-0.661404	0.002043	-0.661404	0.002043	0	0.0456	0.01239	1e-06	0.012443	1e-06	22	93
Alveolates-Dinoflagellates_Alveolates-Dinoflagellates	EU087269.1.895_U	Alveolates-Dinoflagellates	Pfiesteriaceae	Eukaryota; Alveolata; Dinophyta; Dinophyceae; Dinophyceae_X; Pfiesteriaceae; Pfiesteriaceae_X; Pfiesteriaceae_X_sp.;	GU822346.1.1073_U	Alveolates-Dinoflagellates	Protoperidinium	Eukaryota; Alveolata; Dinophyta; Dinophyceae; Dinophyceae_X; Dinophyceae_XX; Protoperidinium; Protoperidinium_sp.;	-0.672853	-0.672853	-0.672853	2	2	18	0	0.016	-0.604034	0.006165	-0.604034	0.006165	0	-0.675735	0.001496	-0.675735	0.001496	0	0.088365	0.026989	2e-06	0.010076	1e-06	22	95
Alveolates-Dinoflagellates_Alveolates-Dinoflagellates	EU087269.1.895_U	Alveolates-Dinoflagellates	Pfiesteriaceae	Eukaryota; Alveolata; Dinophyta; Dinophyceae; Dinophyceae_X; Pfiesteriaceae; Pfiesteriaceae_X; Pfiesteriaceae_X_sp.;	EU793087.1.924_U	Alveolates-Dinoflagellates	Dinophyceae	Eukaryota; Alveolata; Dinophyta; Dinophyceae; Dinophyceae_X; Dinophyceae_XX; Dinophyceae_XXX; Dinophyceae_XXX_sp.;	0.738666	0.738666	0.738666	1	1	19	0	0.002	0.772952	0.000104	0.772952	0.000104	0	0.817544	1.9e-05	0.817544	1.9e-05	0	0.026563	0.00177	0	0.00059	0	22	97
Alveolates-Dinoflagellates_Alveolates-Syndiniales	EU087269.1.895_U	Alveolates-Dinoflagellates	Pfiesteriaceae	Eukaryota; Alveolata; Dinophyta; Dinophyceae; Dinophyceae_X; Pfiesteriaceae; Pfiesteriaceae_X; Pfiesteriaceae_X_sp.;	EU780604.1.1660_U	Alveolates-Syndiniales	Dino-Group-III	Eukaryota; Alveolata; Dinophyta; Syndiniales; Dino-Group-III; Dino-Group-III_X; Dino-Group-III_XX; Dino-Group-III_XX_sp.;	0.691624	0.691624	0.691624	2	2	18	0	0.004	0.723996	0.000457	0.723996	0.000457	0	0.712593	0.000618	0.712593	0.000618	0	0.040295	0.004807	1e-06	0.005531	1e-06	22	103
Alveolates-Dinoflagellates_Alveolates-Dinoflagellates	EU087269.1.895_U	Alveolates-Dinoflagellates	Pfiesteriaceae	Eukaryota; Alveolata; Dinophyta; Dinophyceae; Dinophyceae_X; Pfiesteriaceae; Pfiesteriaceae_X; Pfiesteriaceae_X_sp.;	AY664921.1.1754_U	Alveolates-Dinoflagellates	Prorocentrum	Eukaryota; Alveolata; Dinophyta; Dinophyceae; Dinophyceae_X; Dinophyceae_XX; Prorocentrum; Prorocentrum_sp.;	0.730741	0.730741	0.730741	3	3	17	0	0.001	0.614884	0.005083	0.614884	0.005083	0	0.704695	0.000755	0.704695	0.000755	0	0.017494	0.023897	2e-06	0.006365	1e-06	22	111
Alveolates-Dinoflagellates_Alveolates-Ciliates	EU087269.1.895_U	Alveolates-Dinoflagellates	Pfiesteriaceae	Eukaryota; Alveolata; Dinophyta; Dinophyceae; Dinophyceae_X; Pfiesteriaceae; Pfiesteriaceae_X; Pfiesteriaceae_X_sp.;	DQ120009.1.1729_U	Alveolates-Ciliates	Litostomatea	Eukaryota; Alveolata; Ciliophora; Litostomatea; Cyclotrichia; Cyclotrichia_X; Cyclotrichia_XX; Cyclotrichia_XX_sp.;	-0.758484	-0.758484	-0.758484	3	3	17	0	0	-0.737832	0.000311	-0.737832	0.000311	0	-0.745614	0.000248	-0.745614	0.000248	0	0	0.003755	0	0.003033	0	22	113
Alveolates-Dinoflagellates_Alveolates-Dinoflagellates	EU087269.1.895_U	Alveolates-Dinoflagellates	Pfiesteriaceae	Eukaryota; Alveolata; Dinophyta; Dinophyceae; Dinophyceae_X; Pfiesteriaceae; Pfiesteriaceae_X; Pfiesteriaceae_X_sp.;	KJ759269.1.1802_U	Alveolates-Dinoflagellates	Dinophyceae	Eukaryota; Alveolata; Dinophyta; Dinophyceae; Dinophyceae_X; Dinophyceae_XX; Dinophyceae_XXX; Dinophyceae_XXX_sp.;	0.612383	0.612383	0.612383	2	1	13	1	0.048	0.526552	0.020552	0.538151	0.021232	1	0.597015	0.00696	0.597015	0.00696	0	0.158724	0.058971	4e-06	0.028658	2e-06	22	116
Alveolates-Dinoflagellates_Alveolates-Dinoflagellates	EU087269.1.895_U	Alveolates-Dinoflagellates	Pfiesteriaceae	Eukaryota; Alveolata; Dinophyta; Dinophyceae; Dinophyceae_X; Pfiesteriaceae; Pfiesteriaceae_X; Pfiesteriaceae_X_sp.;	AY664894.1.1756_U	Alveolates-Dinoflagellates	Dinophyceae	Eukaryota; Alveolata; Dinophyta; Dinophyceae; Dinophyceae_X; Dinophyceae_XX; Dinophyceae_XXX; Dinophyceae_XXX_sp.;	0.771328	0.771328	0.771328	2	2	18	0	0.001	0.831812	1e-05	0.831812	1e-05	0	0.814035	2.2e-05	0.814035	2.2e-05	0	0.017494	0.000369	0	0.000635	0	22	117
Alveolates-Dinoflagellates_Alveolates-Dinoflagellates	EU087269.1.895_U	Alveolates-Dinoflagellates	Pfiesteriaceae	Eukaryota; Alveolata; Dinophyta; Dinophyceae; Dinophyceae_X; Pfiesteriaceae; Pfiesteriaceae_X; Pfiesteriaceae_X_sp.;	FN690221.1.1692_U	Alveolates-Dinoflagellates	Dinophyceae	Eukaryota; Alveolata; Dinophyta; Dinophyceae; Dinophyceae_X; Dinophyceae_XX; Dinophyceae_XXX; Dinophyceae_XXX_sp.;	0.692589	0.692589	0.692589	3	3	17	0	0.008	0.379263	0.10928	0.657223	0.020216	7	0.619298	0.00469	0.619298	0.00469	0	0.059414	0.171205	4e-06	0.021692	2e-06	22	118
Alveolates-Dinoflagellates_Stramenopiles-Other	EU087269.1.895_U	Alveolates-Dinoflagellates	Pfiesteriaceae	Eukaryota; Alveolata; Dinophyta; Dinophyceae; Dinophyceae_X; Pfiesteriaceae; Pfiesteriaceae_X; Pfiesteriaceae_X_sp.;	EF695169.1.817_U	Stramenopiles-Other	Florenciellales	Eukaryota; Stramenopiles; Ochrophyta; Dictyochophyceae; Dictyochophyceae_X; Florenciellales; Florenciellales_X; Florenciellales_X_sp.;	0.623371	0.623371	0.623371	1	1	19	0	0.044	0.782147	7.6e-05	0.782147	7.6e-05	0	0.697674	0.000897	0.697674	0.000897	0	0.151655	0.001429	0	0.007199	1e-06	22	121
Alveolates-Dinoflagellates_Alveolates-Ciliates	EU087269.1.895_U	Alveolates-Dinoflagellates	Pfiesteriaceae	Eukaryota; Alveolata; Dinophyta; Dinophyceae; Dinophyceae_X; Pfiesteriaceae; Pfiesteriaceae_X; Pfiesteriaceae_X_sp.;	KC582955.1.1774_U	Alveolates-Ciliates	Spirotrichea	Eukaryota; Alveolata; Ciliophora; Spirotrichea; Strombidiida; Strombidiida_X; Strombidiida_XX; Strombidiida_XX_sp.;	-0.616839	-0.616839	-0.616839	3	3	17	0	0.041	-0.592845	0.00747	-0.592845	0.00747	0	-0.603509	0.006222	-0.603509	0.006222	0	0.146981	0.030744	2e-06	0.026557	2e-06	22	125
Alveolates-Dinoflagellates_Alveolates-Syndiniales	EU087269.1.895_U	Alveolates-Dinoflagellates	Pfiesteriaceae	Eukaryota; Alveolata; Dinophyta; Dinophyceae; Dinophyceae_X; Pfiesteriaceae; Pfiesteriaceae_X; Pfiesteriaceae_X_sp.;	HQ870498.1.849_U	Alveolates-Syndiniales	Dino-Group-III	Eukaryota; Alveolata; Dinophyta; Syndiniales; Dino-Group-III; Dino-Group-III_X; Dino-Group-III_XX; Dino-Group-III_XX_sp.;	0.802366	0.802366	0.802366	1	1	18	0	0	0.829531	1.1e-05	0.829531	1.1e-05	0	0.845344	5e-06	0.845344	5e-06	0	0	0.000387	0	0.000256	0	22	132
Alveolates-Dinoflagellates_Alveolates-Ciliates	EU087269.1.895_U	Alveolates-Dinoflagellates	Pfiesteriaceae	Eukaryota; Alveolata; Dinophyta; Dinophyceae; Dinophyceae_X; Pfiesteriaceae; Pfiesteriaceae_X; Pfiesteriaceae_X_sp.;	KJ762895.1.1749_U	Alveolates-Ciliates	Colpodea	Eukaryota; Alveolata; Ciliophora; Colpodea; Colpodea-1; Colpodea-1_X; Colpodea-1_XX; Colpodea-1_XX_sp.;	0.64334	0.64334	0.64334	2	1	18	1	0.021	0.509373	0.025907	0.509373	0.025907	0	0.307018	0.201054	0.686275	0.001661	1	0.10319	0.069208	4e-06	0.265799	1e-06	22	134
Alveolates-Dinoflagellates_Stramenopiles-Diatoms	EU087269.1.895_U	Alveolates-Dinoflagellates	Pfiesteriaceae	Eukaryota; Alveolata; Dinophyta; Dinophyceae; Dinophyceae_X; Pfiesteriaceae; Pfiesteriaceae_X; Pfiesteriaceae_X_sp.;	EU499988.1.803_U	Stramenopiles-Diatoms	Raphid-pennate	Eukaryota; Stramenopiles; Ochrophyta; Bacillariophyta; Bacillariophyta_X; Raphid-pennate; Raphid-pennate_X; Raphid-pennate_X_sp.;	-0.758773	-0.758773	-0.758773	3	3	17	0	0.002	-0.728128	0.000408	-0.728128	0.000408	0	-0.77193	0.000108	-0.77193	0.000108	0	0.026563	0.004473	1e-06	0.001772	0	22	145
Alveolates-Dinoflagellates_Cryptophytes	EU087269.1.895_U	Alveolates-Dinoflagellates	Pfiesteriaceae	Eukaryota; Alveolata; Dinophyta; Dinophyceae; Dinophyceae_X; Pfiesteriaceae; Pfiesteriaceae_X; Pfiesteriaceae_X_sp.;	GQ863814.1.1651_U	Cryptophytes	Other-unclassified	Eukaryota; Hacrobia; Cryptophyta; Cryptophyceae; Cryptophyceae_X; Goniomonadales; Goniomonas; Goniomonas_sp.;	0.654032	0.654032	0.654032	2	2	18	0	0.025	0.582852	0.008819	0.582852	0.008819	0	0.690654	0.001061	0.690654	0.001061	0	0.113584	0.034446	3e-06	0.008015	1e-06	22	146
Alveolates-Dinoflagellates_Stramenopiles-MAST	EU087269.1.895_U	Alveolates-Dinoflagellates	Pfiesteriaceae	Eukaryota; Alveolata; Dinophyta; Dinophyceae; Dinophyceae_X; Pfiesteriaceae; Pfiesteriaceae_X; Pfiesteriaceae_X_sp.;	AJ402350.1.1758_U	Stramenopiles-MAST	MAST-1	Eukaryota; Stramenopiles; Stramenopiles_X; MAST; MAST-1; MAST-1D; MAST-1D_X; MAST-1D_X_sp.;	0.681892	0.681892	0.681892	3	3	17	0	0.01	0.740021	0.000292	0.740021	0.000292	0	0.722247	0.000479	0.722247	0.000479	0	0.067958	0.003591	0	0.004659	1e-06	22	150
Alveolates-Syndiniales_Alveolates-Dinoflagellates	EU780611.1.1669_U	Alveolates-Syndiniales	Dino-Group-II	Eukaryota; Alveolata; Dinophyta; Syndiniales; Dino-Group-II; Dino-Group-II-Clade-10-and-11; Dino-Group-II-Clade-10-and-11_X; Dino-Group-II-Clade-10-and-11_X_sp.;	GU825315.1.1202_U	Alveolates-Dinoflagellates	Dinophyceae	Eukaryota; Alveolata; Dinophyta; Dinophyceae; Dinophyceae_X; Dinophyceae_XX; Dinophyceae_XXX; Dinophyceae_XXX_sp.;	0.620507	0.620507	0.620507	10	3	10	7	0.024	0.40219	0.087814	0.843224	0.00057	7	0.440351	0.059178	0.86014	0.000332	7	0.111069	0.149663	1e-06	0.123393	0	23	32
Alveolates-Syndiniales_Alveolates-Dinoflagellates	EU780611.1.1669_U	Alveolates-Syndiniales	Dino-Group-II	Eukaryota; Alveolata; Dinophyta; Syndiniales; Dino-Group-II; Dino-Group-II-Clade-10-and-11; Dino-Group-II-Clade-10-and-11_X; Dino-Group-II-Clade-10-and-11_X_sp.;	KF129831.1.1758_U	Alveolates-Dinoflagellates	Dinophyceae	Eukaryota; Alveolata; Dinophyta; Dinophyceae; Dinophyceae_X; Dinophyceae_XX; Dinophyceae_XXX; Dinophyceae_XXX_sp.;	0.659601	0.659601	0.659601	10	3	10	7	0.004	0.379381	0.10916	0.829895	0.000837	7	0.320823	0.180498	0.89007	0.000105	7	0.040295	0.171188	1e-06	0.249809	0	23	40
Alveolates-Syndiniales_Alveolates-Dinoflagellates	EU780611.1.1669_U	Alveolates-Syndiniales	Dino-Group-II	Eukaryota; Alveolata; Dinophyta; Syndiniales; Dino-Group-II; Dino-Group-II-Clade-10-and-11; Dino-Group-II-Clade-10-and-11_X; Dino-Group-II-Clade-10-and-11_X_sp.;	HM581705.1.1793_U	Alveolates-Dinoflagellates	Dinophyceae	Eukaryota; Alveolata; Dinophyta; Dinophyceae; Dinophyceae_X; Dinophyceae_XX; Dinophyceae_XXX; Dinophyceae_XXX_sp.;	0.584385	0.584385	0.584385	9	2	11	7	0.04	0.314671	0.189476	0.65167	0.021676	7	0.315928	0.187617	0.846154	0.000521	7	0.145146	0.239298	4e-06	0.255063	1e-06	23	55
Alveolates-Syndiniales_Alveolates-Dinoflagellates	EU780611.1.1669_U	Alveolates-Syndiniales	Dino-Group-II	Eukaryota; Alveolata; Dinophyta; Syndiniales; Dino-Group-II; Dino-Group-II-Clade-10-and-11; Dino-Group-II-Clade-10-and-11_X; Dino-Group-II-Clade-10-and-11_X_sp.;	HE611580.1.1746_U	Alveolates-Dinoflagellates	Gyrodinium	Eukaryota; Alveolata; Dinophyta; Dinophyceae; Dinophyceae_X; Dinophyceae_XX; Gyrodinium; Gyrodinium_sp.;	0.579593	0.579593	0.579593	8	1	12	7	0.049	0.337961	0.157017	0.810468	0.001388	7	0.300132	0.211864	0.825175	0.000951	7	0.160556	0.214246	1e-06	0.274722	1e-06	23	65
Alveolates-Syndiniales_Alveolates-Dinoflagellates	EU780611.1.1669_U	Alveolates-Syndiniales	Dino-Group-II	Eukaryota; Alveolata; Dinophyta; Syndiniales; Dino-Group-II; Dino-Group-II-Clade-10-and-11; Dino-Group-II-Clade-10-and-11_X; Dino-Group-II-Clade-10-and-11_X_sp.;	AY664921.1.1754_U	Alveolates-Dinoflagellates	Prorocentrum	Eukaryota; Alveolata; Dinophyta; Dinophyceae; Dinophyceae_X; Dinophyceae_XX; Prorocentrum; Prorocentrum_sp.;	0.58157	0.58157	0.58157	9	2	11	7	0.044	0.250388	0.301179	0.643005	0.024105	7	0.350154	0.141653	0.741259	0.005801	7	0.151655	0.314275	4e-06	0.214523	2e-06	23	111
Alveolates-Syndiniales_Stramenopiles-Other	EU780611.1.1669_U	Alveolates-Syndiniales	Dino-Group-II	Eukaryota; Alveolata; Dinophyta; Syndiniales; Dino-Group-II; Dino-Group-II-Clade-10-and-11; Dino-Group-II-Clade-10-and-11_X; Dino-Group-II-Clade-10-and-11_X_sp.;	HQ866297.1.886_U	Stramenopiles-Other	Aplanochytrium	Eukaryota; Stramenopiles; Stramenopiles_X; Labyrinthulea; Labyrinthulales; Labyrinthulaceae; Aplanochytrium; Aplanochytrium_sp.;	-0.630837	-0.630837	-0.630837	1	2	17	-1	0.016	-0.062578	0.799109	-0.681487	0.001843	-1	-0.117595	0.631614	-0.679401	0.001928	-1	0.088365	0.52454	1e-06	0.503235	1e-06	23	133
Alveolates-Syndiniales_Stramenopiles-Diatoms	EU780611.1.1669_U	Alveolates-Syndiniales	Dino-Group-II	Eukaryota; Alveolata; Dinophyta; Syndiniales; Dino-Group-II; Dino-Group-II-Clade-10-and-11; Dino-Group-II-Clade-10-and-11_X; Dino-Group-II-Clade-10-and-11_X_sp.;	EU499988.1.803_U	Stramenopiles-Diatoms	Raphid-pennate	Eukaryota; Stramenopiles; Ochrophyta; Bacillariophyta; Bacillariophyta_X; Raphid-pennate; Raphid-pennate_X; Raphid-pennate_X_sp.;	-0.605491	-0.605491	-0.605491	8	1	12	7	0.025	-0.188561	0.439467	-0.80642	0.001531	7	-0.249123	0.303709	-0.832168	0.000785	7	0.113584	0.38732	1e-06	0.339824	1e-06	23	145
Alveolates-Syndiniales_Cryptophytes	EU780611.1.1669_U	Alveolates-Syndiniales	Dino-Group-II	Eukaryota; Alveolata; Dinophyta; Syndiniales; Dino-Group-II; Dino-Group-II-Clade-10-and-11; Dino-Group-II-Clade-10-and-11_X; Dino-Group-II-Clade-10-and-11_X_sp.;	GQ863814.1.1651_U	Cryptophytes	Other-unclassified	Eukaryota; Hacrobia; Cryptophyta; Cryptophyceae; Cryptophyceae_X; Goniomonadales; Goniomonas; Goniomonas_sp.;	-0.598733	-0.598733	-0.598733	1	4	16	-3	0.037	0.215346	0.375942	-0.682834	0.005024	-4	0.36595	0.123349	-0.773906	0.00071	-4	0.139515	0.355176	2e-06	0.196342	1e-06	23	146
Alveolates-Syndiniales_Chl	EU780611.1.1669_U	Alveolates-Syndiniales	Dino-Group-II	Eukaryota; Alveolata; Dinophyta; Syndiniales; Dino-Group-II; Dino-Group-II-Clade-10-and-11; Dino-Group-II-Clade-10-and-11_X; Dino-Group-II-Clade-10-and-11_X_sp.;	Chl	Chl	NA	NA	-0.576776	-0.576776	-0.576776	1	1	16	0	0.049	-0.399815	0.089881	-0.757038	0.00436	7	-0.512281	0.024931	-0.65035	0.022034	7	0.160556	0.151739	2e-06	0.069219	4e-06	23	205
Alveolates-Syndiniales_is6PM	EU780611.1.1669_U	Alveolates-Syndiniales	Dino-Group-II	Eukaryota; Alveolata; Dinophyta; Syndiniales; Dino-Group-II; Dino-Group-II-Clade-10-and-11; Dino-Group-II-Clade-10-and-11_X; Dino-Group-II-Clade-10-and-11_X_sp.;	is6PM	is6PM	NA	NA	0.581916	0.581916	0.581916	1	1	19	0	0.042	0.51392	0.024394	0.547815	0.052615	6	0.565685	0.01159	0.58554	0.035505	6	0.148696	0.066584	6e-06	0.041276	5e-06	23	208
Alveolates-Ciliates_Alveolates-Ciliates	KJ759341.1.1721_U	Alveolates-Ciliates	Phyllopharyngea	Eukaryota; Alveolata; Ciliophora; Phyllopharyngea; Cyrtophoria; Chlamydodontidae; Chlamydodon; Chlamydodon_sp.;	GU819492.1.1175_U	Alveolates-Ciliates	Spirotrichea	Eukaryota; Alveolata; Ciliophora; Spirotrichea; Strombidiida; Strombidiidae_J; Strombidiidae_J_X; Strombidiidae_J_X_sp.;	0.709871	0.709871	0.709871	1	1	19	0	0.004	0.714269	0.000591	0.714269	0.000591	0	0.75856	0.000167	0.75856	0.000167	0	0.040295	0.005646	1e-06	0.002363	0	24	25
Alveolates-Ciliates_Alveolates-Dinoflagellates	KJ759341.1.1721_U	Alveolates-Ciliates	Phyllopharyngea	Eukaryota; Alveolata; Ciliophora; Phyllopharyngea; Cyrtophoria; Chlamydodontidae; Chlamydodon; Chlamydodon_sp.;	GU825315.1.1202_U	Alveolates-Dinoflagellates	Dinophyceae	Eukaryota; Alveolata; Dinophyta; Dinophyceae; Dinophyceae_X; Dinophyceae_XX; Dinophyceae_XXX; Dinophyceae_XXX_sp.;	-0.636495	-0.636495	-0.636495	6	6	13	0	0.03	-0.607498	0.005801	-0.607498	0.005801	0	-0.572181	0.010469	-0.572181	0.010469	0	0.125466	0.025952	2e-06	0.038292	3e-06	24	32
Alveolates-Ciliates_Stramenopiles-MAST	KJ759341.1.1721_U	Alveolates-Ciliates	Phyllopharyngea	Eukaryota; Alveolata; Ciliophora; Phyllopharyngea; Cyrtophoria; Chlamydodontidae; Chlamydodon; Chlamydodon_sp.;	JQ782004.1.1784_U	Stramenopiles-MAST	MAST-1	Eukaryota; Stramenopiles; Stramenopiles_X; MAST; MAST-1; MAST-1C; MAST-1C_X; MAST-1C_X_sp.;	-0.63259	-0.63259	-0.63259	1	1	19	0	0.028	-0.629142	0.003903	-0.629142	0.003903	0	-0.681599	0.00131	-0.681599	0.00131	0	0.120985	0.020244	2e-06	0.009223	1e-06	24	37
Alveolates-Ciliates_Stramenopiles-MAST	KJ759341.1.1721_U	Alveolates-Ciliates	Phyllopharyngea	Eukaryota; Alveolata; Ciliophora; Phyllopharyngea; Cyrtophoria; Chlamydodontidae; Chlamydodon; Chlamydodon_sp.;	KF129967.1.1739_U	Stramenopiles-MAST	MAST-9	Eukaryota; Stramenopiles; Stramenopiles_X; MAST; MAST-9; MAST-9A; MAST-9A_X; MAST-9A_X_sp.;	0.701526	0.701526	0.701526	6	6	14	0	0.01	0.718841	0.000525	0.718841	0.000525	0	0.741001	0.000284	0.741001	0.000284	0	0.067958	0.005219	1e-06	0.003318	0	24	38
Alveolates-Ciliates_Alveolates-Ciliates	KJ759341.1.1721_U	Alveolates-Ciliates	Phyllopharyngea	Eukaryota; Alveolata; Ciliophora; Phyllopharyngea; Cyrtophoria; Chlamydodontidae; Chlamydodon; Chlamydodon_sp.;	KJ762830.1.1769_U	Alveolates-Ciliates	Spirotrichea	Eukaryota; Alveolata; Ciliophora; Spirotrichea; Strombidiida; Tontoniidae_A; Tontoniidae_A_X; Tontoniidae_A_X_sp.;	-0.607864	-0.607864	-0.607864	2	1	18	1	0.044	-0.341443	0.152517	-0.580846	0.01148	1	-0.22972	0.344106	-0.575813	0.012395	1	0.151655	0.210731	3e-06	0.363851	3e-06	24	46
Alveolates-Ciliates_Alveolates-Ciliates	KJ759341.1.1721_U	Alveolates-Ciliates	Phyllopharyngea	Eukaryota; Alveolata; Ciliophora; Phyllopharyngea; Cyrtophoria; Chlamydodontidae; Chlamydodon; Chlamydodon_sp.;	KF130183.1.1714_U	Alveolates-Ciliates	Colpodea	Eukaryota; Alveolata; Ciliophora; Colpodea; Colpodea-1; Colpodea-1_X; Colpodea-1_XX; Colpodea-1_XX_sp.;	0.631209	0.631209	0.631209	6	1	14	5	0.042	-0.223197	0.358355	0.769958	0.001277	5	-0.125936	0.607441	0.738703	0.002546	5	0.148696	0.344961	1e-06	0.493906	1e-06	24	48
Alveolates-Ciliates_Alveolates-Dinoflagellates	KJ759341.1.1721_U	Alveolates-Ciliates	Phyllopharyngea	Eukaryota; Alveolata; Ciliophora; Phyllopharyngea; Cyrtophoria; Chlamydodontidae; Chlamydodon; Chlamydodon_sp.;	GU825000.1.1197_U	Alveolates-Dinoflagellates	Dinophyceae	Eukaryota; Alveolata; Dinophyta; Dinophyceae; Dinophyceae_X; Dinophyceae_XX; Dinophyceae_XXX; Dinophyceae_XXX_sp.;	0.720331	0.720331	0.720331	1	1	19	0	0.005	0.741869	0.000277	0.741869	0.000277	0	0.763493	0.000143	0.763493	0.000143	0	0.0456	0.003473	0	0.00214	0	24	64
Alveolates-Ciliates_Alveolates-Dinoflagellates	KJ759341.1.1721_U	Alveolates-Ciliates	Phyllopharyngea	Eukaryota; Alveolata; Ciliophora; Phyllopharyngea; Cyrtophoria; Chlamydodontidae; Chlamydodon; Chlamydodon_sp.;	HM581766.1.1782_U	Alveolates-Dinoflagellates	Prorocentrum	Eukaryota; Alveolata; Dinophyta; Dinophyceae; Dinophyceae_X; Dinophyceae_XX; Prorocentrum; Prorocentrum_sp.;	-0.703501	-0.703501	-0.703501	2	2	18	0	0.01	-0.737661	0.000313	-0.737661	0.000313	0	-0.750329	0.000215	-0.750329	0.000215	0	0.067958	0.003763	0	0.002767	0	24	66
Alveolates-Ciliates_Alveolates-Ciliates	KJ759341.1.1721_U	Alveolates-Ciliates	Phyllopharyngea	Eukaryota; Alveolata; Ciliophora; Phyllopharyngea; Cyrtophoria; Chlamydodontidae; Chlamydodon; Chlamydodon_sp.;	JX188331.1.1726_U	Alveolates-Ciliates	Oligohymenophorea	Eukaryota; Alveolata; Ciliophora; Oligohymenophorea; Scuticociliatia; Scuticociliatia-1; Scuticociliatia-1_X; Scuticociliatia-1_X_sp.;	0.743517	0.743517	0.743517	5	5	15	0	0.001	0.701045	0.000826	0.701045	0.000826	0	0.749452	0.000221	0.749452	0.000221	0	0.017494	0.007025	1e-06	0.002807	0	24	69
Alveolates-Ciliates_Alveolates-Dinoflagellates	KJ759341.1.1721_U	Alveolates-Ciliates	Phyllopharyngea	Eukaryota; Alveolata; Ciliophora; Phyllopharyngea; Cyrtophoria; Chlamydodontidae; Chlamydodon; Chlamydodon_sp.;	HM561067.1.974_U	Alveolates-Dinoflagellates	Dinophyceae	Eukaryota; Alveolata; Dinophyta; Dinophyceae; Dinophyceae_X; Dinophyceae_XX; Dinophyceae_XXX; Dinophyceae_XXX_sp.;	0.674065	0.674065	0.674065	1	1	19	0	0.022	0.6923	0.001021	0.6923	0.001021	0	0.724879	0.000446	0.724879	0.000446	0	0.106234	0.008183	1e-06	0.004422	1e-06	24	71
Alveolates-Ciliates_Alveolates-Ciliates	KJ759341.1.1721_U	Alveolates-Ciliates	Phyllopharyngea	Eukaryota; Alveolata; Ciliophora; Phyllopharyngea; Cyrtophoria; Chlamydodontidae; Chlamydodon; Chlamydodon_sp.;	KF129779.1.1734_U	Alveolates-Ciliates	Spirotrichea	Eukaryota; Alveolata; Ciliophora; Spirotrichea; Strombidiida; Tontoniidae_A; Spirotontonia; Spirotontonia_sp.;	-0.724495	-0.724495	-0.724495	6	3	14	3	0.003	0.143331	0.558287	-0.704766	0.002299	3	0.169373	0.48819	-0.741176	0.001018	3	0.033974	0.439742	1e-06	0.441043	1e-06	24	72
Alveolates-Ciliates_Alveolates-Ciliates	KJ759341.1.1721_U	Alveolates-Ciliates	Phyllopharyngea	Eukaryota; Alveolata; Ciliophora; Phyllopharyngea; Cyrtophoria; Chlamydodontidae; Chlamydodon; Chlamydodon_sp.;	AY665059.1.1720_U	Alveolates-Ciliates	Oligohymenophorea	Eukaryota; Alveolata; Ciliophora; Oligohymenophorea; Scuticociliatia; Scuticociliatia-1; Scuticociliatia-1_X; Scuticociliatia-1_X_sp.;	0.7348	0.7348	0.7348	6	6	14	0	0.001	0.765879	0.000132	0.765879	0.000132	0	0.755926	0.000181	0.755926	0.000181	0	0.017494	0.002094	0	0.00246	0	24	77
Alveolates-Ciliates_Rhizaria-Acantharia	KJ759341.1.1721_U	Alveolates-Ciliates	Phyllopharyngea	Eukaryota; Alveolata; Ciliophora; Phyllopharyngea; Cyrtophoria; Chlamydodontidae; Chlamydodon; Chlamydodon_sp.;	HM561210.1.973_U	Rhizaria-Acantharia	Acantharea	Eukaryota; Rhizaria; Radiolaria; Acantharea; Acantharea_X; Acantharea_XX; Acantharea_XXX; Acantharea_XXX_sp.;	0.708298	0.708298	0.708298	6	6	14	0	0.005	0.736579	0.000322	0.736579	0.000322	0	0.739245	0.000299	0.739245	0.000299	0	0.0456	0.00386	0	0.003425	0	24	80
Alveolates-Ciliates_Archaeplastids-Chlorophytes	KJ759341.1.1721_U	Alveolates-Ciliates	Phyllopharyngea	Eukaryota; Alveolata; Ciliophora; Phyllopharyngea; Cyrtophoria; Chlamydodontidae; Chlamydodon; Chlamydodon_sp.;	EU143529.1.906_U	Archaeplastids-Chlorophytes	Pyramimonadales	Eukaryota; Archaeplastida; Chlorophyta; Pyramimonadales; Pyramimonadales_X; Pyramimonadales_XX; Pterosperma; Pterosperma_sp.;	-0.66226	-0.66226	-0.66226	1	1	19	0	0.023	-0.680624	0.001339	-0.680624	0.001339	0	-0.703557	0.000776	-0.703557	0.000776	0	0.108834	0.009926	1e-06	0.0065	1e-06	24	84
Alveolates-Ciliates_Alveolates-Ciliates	KJ759341.1.1721_U	Alveolates-Ciliates	Phyllopharyngea	Eukaryota; Alveolata; Ciliophora; Phyllopharyngea; Cyrtophoria; Chlamydodontidae; Chlamydodon; Chlamydodon_sp.;	KJ759492.1.1752_U	Alveolates-Ciliates	Phyllopharyngea	Eukaryota; Alveolata; Ciliophora; Phyllopharyngea; Cyrtophoria; Chlamydodontidae; Chlamydodon; Chlamydodon_sp.;	0.655937	0.655937	0.655937	1	1	19	0	0.022	0.64682	0.002762	0.64682	0.002762	0	0.680123	0.001355	0.680123	0.001355	0	0.106234	0.016072	2e-06	0.009439	1e-06	24	93
Alveolates-Ciliates_Alveolates-Dinoflagellates	KJ759341.1.1721_U	Alveolates-Ciliates	Phyllopharyngea	Eukaryota; Alveolata; Ciliophora; Phyllopharyngea; Cyrtophoria; Chlamydodontidae; Chlamydodon; Chlamydodon_sp.;	EU793087.1.924_U	Alveolates-Dinoflagellates	Dinophyceae	Eukaryota; Alveolata; Dinophyta; Dinophyceae; Dinophyceae_X; Dinophyceae_XX; Dinophyceae_XXX; Dinophyceae_XXX_sp.;	-0.675525	-0.675525	-0.675525	6	6	14	0	0.014	-0.665826	0.001859	-0.665826	0.001859	0	-0.695919	0.000936	-0.695919	0.000936	0	0.081741	0.01239	1e-06	0.007377	1e-06	24	97
Alveolates-Ciliates_Alveolates-Dinoflagellates	KJ759341.1.1721_U	Alveolates-Ciliates	Phyllopharyngea	Eukaryota; Alveolata; Ciliophora; Phyllopharyngea; Cyrtophoria; Chlamydodontidae; Chlamydodon; Chlamydodon_sp.;	FJ402953.1.1215_U	Alveolates-Dinoflagellates	Neoceratium	Eukaryota; Alveolata; Dinophyta; Dinophyceae; Dinophyceae_X; Dinophyceae_XX; Neoceratium; Neoceratium_petersii;	-0.62119	-0.62119	-0.62119	7	5	13	2	0.041	-0.539532	0.01712	-0.57142	0.016567	2	-0.428446	0.067222	-0.507664	0.037496	2	0.146981	0.052321	3e-06	0.13429	6e-06	24	98
Alveolates-Ciliates_Alveolates-Ciliates	KJ759341.1.1721_U	Alveolates-Ciliates	Phyllopharyngea	Eukaryota; Alveolata; Ciliophora; Phyllopharyngea; Cyrtophoria; Chlamydodontidae; Chlamydodon; Chlamydodon_sp.;	HQ867071.1.870_U	Alveolates-Ciliates	Spirotrichea	Eukaryota; Alveolata; Ciliophora; Spirotrichea; Strombidiida_G; Strombidiida_G_X; Strombidiida_G_XX; Strombidiida_G_XX_sp.;	-0.659354	-0.659354	-0.659354	7	1	13	6	0.012	-0.48629	0.034759	-0.669485	0.012316	6	-0.451273	0.052457	-0.703297	0.007319	6	0.074959	0.083973	3e-06	0.114365	2e-06	24	106
Alveolates-Ciliates_Alveolates-Ciliates	KJ759341.1.1721_U	Alveolates-Ciliates	Phyllopharyngea	Eukaryota; Alveolata; Ciliophora; Phyllopharyngea; Cyrtophoria; Chlamydodontidae; Chlamydodon; Chlamydodon_sp.;	DQ120009.1.1729_U	Alveolates-Ciliates	Litostomatea	Eukaryota; Alveolata; Ciliophora; Litostomatea; Cyclotrichia; Cyclotrichia_X; Cyclotrichia_XX; Cyclotrichia_XX_sp.;	0.678902	0.678902	0.678902	1	1	19	0	0.011	0.666097	0.001848	0.666097	0.001848	0	0.714348	0.00059	0.714348	0.00059	0	0.071521	0.012368	1e-06	0.005381	1e-06	24	113
Alveolates-Ciliates_Rhizaria-Acantharia	KJ759341.1.1721_U	Alveolates-Ciliates	Phyllopharyngea	Eukaryota; Alveolata; Ciliophora; Phyllopharyngea; Cyrtophoria; Chlamydodontidae; Chlamydodon; Chlamydodon_sp.;	JN811185.1.1695_U	Rhizaria-Acantharia	Lychnaspis	Eukaryota; Rhizaria; Radiolaria; Acantharea; Arthracanthida-Symphyacanthida; Arthracanthida-Symphyacanthida_X; Lychnaspis; Lychnaspis_giltschi;	-0.63789	-0.63789	-0.63789	7	6	12	1	0.036	0.099815	0.684327	-0.640627	0.004178	1	0.11584	0.636747	-0.589572	0.010023	1	0.137718	0.485483	2e-06	0.505319	3e-06	24	114
Alveolates-Ciliates_Stramenopiles-Other	KJ759341.1.1721_U	Alveolates-Ciliates	Phyllopharyngea	Eukaryota; Alveolata; Ciliophora; Phyllopharyngea; Cyrtophoria; Chlamydodontidae; Chlamydodon; Chlamydodon_sp.;	EF695169.1.817_U	Stramenopiles-Other	Florenciellales	Eukaryota; Stramenopiles; Ochrophyta; Dictyochophyceae; Dictyochophyceae_X; Florenciellales; Florenciellales_X; Florenciellales_X_sp.;	-0.63064	-0.63064	-0.63064	6	6	14	0	0.027	-0.605305	0.006029	-0.605305	0.006029	0	-0.597015	0.00696	-0.614669	0.006639	-1	0.118689	0.026627	2e-06	0.028658	2e-06	24	121
Alveolates-Ciliates_Alveolates-Ciliates	KJ759341.1.1721_U	Alveolates-Ciliates	Phyllopharyngea	Eukaryota; Alveolata; Ciliophora; Phyllopharyngea; Cyrtophoria; Chlamydodontidae; Chlamydodon; Chlamydodon_sp.;	KC582955.1.1774_U	Alveolates-Ciliates	Spirotrichea	Eukaryota; Alveolata; Ciliophora; Spirotrichea; Strombidiida; Strombidiida_X; Strombidiida_XX; Strombidiida_XX_sp.;	0.729815	0.729815	0.729815	1	1	19	0	0.005	0.713903	0.000597	0.713903	0.000597	0	0.799474	4e-05	0.799474	4e-05	0	0.0456	0.00568	1e-06	0.000938	0	24	125
Alveolates-Ciliates_Stramenopiles-Diatoms	KJ759341.1.1721_U	Alveolates-Ciliates	Phyllopharyngea	Eukaryota; Alveolata; Ciliophora; Phyllopharyngea; Cyrtophoria; Chlamydodontidae; Chlamydodon; Chlamydodon_sp.;	GU822947.1.1074_U	Stramenopiles-Diatoms	Haslea	Eukaryota; Stramenopiles; Ochrophyta; Bacillariophyta; Bacillariophyta_X; Raphid-pennate; Haslea; Haslea_sp.;	0.72396	0.72396	0.72396	2	2	18	0	0.003	0.749974	0.000218	0.749974	0.000218	0	0.772947	0.000104	0.772947	0.000104	0	0.033974	0.002924	0	0.001732	0	24	139
Alveolates-Ciliates_Stramenopiles-Diatoms	KJ759341.1.1721_U	Alveolates-Ciliates	Phyllopharyngea	Eukaryota; Alveolata; Ciliophora; Phyllopharyngea; Cyrtophoria; Chlamydodontidae; Chlamydodon; Chlamydodon_sp.;	EU499988.1.803_U	Stramenopiles-Diatoms	Raphid-pennate	Eukaryota; Stramenopiles; Ochrophyta; Bacillariophyta; Bacillariophyta_X; Raphid-pennate; Raphid-pennate_X; Raphid-pennate_X_sp.;	0.616321	0.616321	0.616321	1	1	19	0	0.04	0.6597	0.002118	0.6597	0.002118	0	0.639754	0.00318	0.639754	0.00318	0	0.145146	0.013537	1e-06	0.016864	2e-06	24	145
Alveolates-Ciliates_Stramenopiles-MAST	KJ759341.1.1721_U	Alveolates-Ciliates	Phyllopharyngea	Eukaryota; Alveolata; Ciliophora; Phyllopharyngea; Cyrtophoria; Chlamydodontidae; Chlamydodon; Chlamydodon_sp.;	AJ402350.1.1758_U	Stramenopiles-MAST	MAST-1	Eukaryota; Stramenopiles; Stramenopiles_X; MAST; MAST-1; MAST-1D; MAST-1D_X; MAST-1D_X_sp.;	-0.678663	-0.678663	-0.678663	6	6	14	0	0.011	-0.715226	0.000577	-0.715226	0.000577	0	-0.691396	0.001043	-0.691396	0.001043	0	0.071521	0.005586	1e-06	0.007922	1e-06	24	150
Alveolates-Ciliates_Alveolates-Syndiniales	GU819492.1.1175_U	Alveolates-Ciliates	Spirotrichea	Eukaryota; Alveolata; Ciliophora; Spirotrichea; Strombidiida; Strombidiidae_J; Strombidiidae_J_X; Strombidiidae_J_X_sp.;	FJ431723.1.830_U	Alveolates-Syndiniales	Dino-Group-III	Eukaryota; Alveolata; Dinophyta; Syndiniales; Dino-Group-III; Dino-Group-III_X; Dino-Group-III_XX; Dino-Group-III_XX_sp.;	-0.641271	-0.641271	-0.641271	2	2	17	0	0.029	-0.697146	0.000909	-0.697146	0.000909	0	-0.636962	0.003358	0.745975	0.001406	-4	0.123397	0.007519	1e-06	0.017449	1e-06	25	27
Alveolates-Ciliates_Alveolates-Ciliates	GU819492.1.1175_U	Alveolates-Ciliates	Spirotrichea	Eukaryota; Alveolata; Ciliophora; Spirotrichea; Strombidiida; Strombidiidae_J; Strombidiidae_J_X; Strombidiidae_J_X_sp.;	KJ762491.1.1777_U	Alveolates-Ciliates	Spirotrichea	Eukaryota; Alveolata; Ciliophora; Spirotrichea; Strombidiida; Strombidiidae; Strombidiidae_X; Strombidiidae_X_sp.;	-0.645379	-0.645379	-0.645379	1	1	18	0	0.019	-0.661655	0.002032	-0.661655	0.002032	0	-0.681831	0.001303	-0.689208	0.009164	6	0.097312	0.013202	1e-06	0.009193	3e-06	25	30
Alveolates-Ciliates_Alveolates-Dinoflagellates	GU819492.1.1175_U	Alveolates-Ciliates	Spirotrichea	Eukaryota; Alveolata; Ciliophora; Spirotrichea; Strombidiida; Strombidiidae_J; Strombidiidae_J_X; Strombidiidae_J_X_sp.;	GU825315.1.1202_U	Alveolates-Dinoflagellates	Dinophyceae	Eukaryota; Alveolata; Dinophyta; Dinophyceae; Dinophyceae_X; Dinophyceae_XX; Dinophyceae_XXX; Dinophyceae_XXX_sp.;	-0.735745	-0.735745	-0.735745	3	3	16	0	0.004	-0.754503	0.000189	-0.754503	0.000189	0	-0.720492	0.000502	-0.720492	0.000502	0	0.040295	0.002648	0	0.004813	1e-06	25	32
Alveolates-Ciliates_Stramenopiles-MAST	GU819492.1.1175_U	Alveolates-Ciliates	Spirotrichea	Eukaryota; Alveolata; Ciliophora; Spirotrichea; Strombidiida; Strombidiidae_J; Strombidiidae_J_X; Strombidiidae_J_X_sp.;	JQ782004.1.1784_U	Stramenopiles-MAST	MAST-1	Eukaryota; Stramenopiles; Stramenopiles_X; MAST; MAST-1; MAST-1C; MAST-1C_X; MAST-1C_X_sp.;	-0.664476	-0.664476	-0.664476	1	1	19	0	0.026	-0.720561	0.000501	-0.720561	0.000501	0	-0.714537	0.000587	-0.714537	0.000587	0	0.116273	0.005059	1e-06	0.005369	1e-06	25	37
Alveolates-Ciliates_Stramenopiles-MAST	GU819492.1.1175_U	Alveolates-Ciliates	Spirotrichea	Eukaryota; Alveolata; Ciliophora; Spirotrichea; Strombidiida; Strombidiidae_J; Strombidiidae_J_X; Strombidiidae_J_X_sp.;	KF129967.1.1739_U	Stramenopiles-MAST	MAST-9	Eukaryota; Stramenopiles; Stramenopiles_X; MAST; MAST-9; MAST-9A; MAST-9A_X; MAST-9A_X_sp.;	0.738111	0.738111	0.738111	1	1	19	0	0.002	0.773519	0.000102	0.773519	0.000102	0	0.795874	4.6e-05	0.795874	4.6e-05	0	0.026563	0.00175	0	0.001018	0	25	38
Alveolates-Ciliates_Alveolates-Dinoflagellates	GU819492.1.1175_U	Alveolates-Ciliates	Spirotrichea	Eukaryota; Alveolata; Ciliophora; Spirotrichea; Strombidiida; Strombidiidae_J; Strombidiidae_J_X; Strombidiidae_J_X_sp.;	KF129831.1.1758_U	Alveolates-Dinoflagellates	Dinophyceae	Eukaryota; Alveolata; Dinophyta; Dinophyceae; Dinophyceae_X; Dinophyceae_XX; Dinophyceae_XXX; Dinophyceae_XXX_sp.;	-0.6909	-0.6909	-0.6909	3	3	16	0	0.01	-0.610893	0.005461	0.695827	0.003966	-4	-0.62863	0.003941	0.721977	0.002372	-4	0.067958	0.025096	2e-06	0.019317	1e-06	25	40
Alveolates-Ciliates_Stramenopiles-Pelagophytes	GU819492.1.1175_U	Alveolates-Ciliates	Spirotrichea	Eukaryota; Alveolata; Ciliophora; Spirotrichea; Strombidiida; Strombidiidae_J; Strombidiidae_J_X; Strombidiidae_J_X_sp.;	GU196150.1.1374_U	Stramenopiles-Pelagophytes	Pelagomonadaceae_clade_A	Eukaryota; Stramenopiles; Ochrophyta; Pelagophyceae; Pelagomonadales; Pelagomonadaceae; Pelagomonadaceae_clade_A; Pelagomonadaceae_clade_A_sp.;	-0.656114	-0.656114	-0.656114	1	1	19	0	0.02	-0.813	2.3e-05	-0.813	2.3e-05	0	-0.703818	0.000771	-0.703818	0.000771	0	0.100183	0.000624	0	0.006471	1e-06	25	52
Alveolates-Ciliates_Alveolates-Dinoflagellates	GU819492.1.1175_U	Alveolates-Ciliates	Spirotrichea	Eukaryota; Alveolata; Ciliophora; Spirotrichea; Strombidiida; Strombidiidae_J; Strombidiidae_J_X; Strombidiidae_J_X_sp.;	HM581705.1.1793_U	Alveolates-Dinoflagellates	Dinophyceae	Eukaryota; Alveolata; Dinophyta; Dinophyceae; Dinophyceae_X; Dinophyceae_XX; Dinophyceae_XXX; Dinophyceae_XXX_sp.;	0.626887	0.626887	0.626887	1	5	15	-4	0.038	-0.462861	0.045977	0.784302	0.000537	-4	-0.619842	0.004644	0.745309	0.001428	-4	0.141376	0.100586	1e-06	0.021583	1e-06	25	55
Alveolates-Ciliates_Alveolates-Ciliates	GU819492.1.1175_U	Alveolates-Ciliates	Spirotrichea	Eukaryota; Alveolata; Ciliophora; Spirotrichea; Strombidiida; Strombidiidae_J; Strombidiidae_J_X; Strombidiidae_J_X_sp.;	GU819408.1.1363_U	Alveolates-Ciliates	Colpodea	Eukaryota; Alveolata; Ciliophora; Colpodea; Colpodea-1; Colpodea-1_X; Colpodea-1_XX; Colpodea-1_XX_sp.;	-0.684737	-0.684737	-0.684737	2	1	17	1	0.011	-0.094268	0.701078	-0.723584	0.000688	1	-0.261518	0.279473	-0.735158	0.000509	1	0.071521	0.491437	1e-06	0.323899	1e-06	25	58
Alveolates-Ciliates_Stramenopiles-Other	GU819492.1.1175_U	Alveolates-Ciliates	Spirotrichea	Eukaryota; Alveolata; Ciliophora; Spirotrichea; Strombidiida; Strombidiidae_J; Strombidiidae_J_X; Strombidiidae_J_X_sp.;	EF695122.1.814_U	Stramenopiles-Other	MOCH-2	Eukaryota; Stramenopiles; Stramenopiles_X; MOCH; MOCH-2; MOCH-2_X; MOCH-2_XX; MOCH-2_XX_sp.;	0.736755	0.736755	0.736755	1	1	19	0	0.001	0.79435	4.9e-05	0.79435	4.9e-05	0	0.766257	0.00013	0.766257	0.00013	0	0.017494	0.001071	0	0.002008	0	25	60
Alveolates-Ciliates_Stramenopiles-MAST	GU819492.1.1175_U	Alveolates-Ciliates	Spirotrichea	Eukaryota; Alveolata; Ciliophora; Spirotrichea; Strombidiida; Strombidiidae_J; Strombidiidae_J_X; Strombidiidae_J_X_sp.;	GU823216.1.1365_U	Stramenopiles-MAST	MAST-3	Eukaryota; Stramenopiles; Stramenopiles_X; MAST; MAST-3; MAST-3I; MAST-3I_X; MAST-3I_X_sp.;	0.657065	0.657065	0.657065	3	3	14	0	0.025	0.509603	0.025829	-0.60812	0.016163	-4	0.522159	0.021829	-0.5916	0.020176	-4	0.113584	0.069056	3e-06	0.063426	4e-06	25	61
Alveolates-Ciliates_Alveolates-Dinoflagellates	GU819492.1.1175_U	Alveolates-Ciliates	Spirotrichea	Eukaryota; Alveolata; Ciliophora; Spirotrichea; Strombidiida; Strombidiidae_J; Strombidiidae_J_X; Strombidiidae_J_X_sp.;	GU825000.1.1197_U	Alveolates-Dinoflagellates	Dinophyceae	Eukaryota; Alveolata; Dinophyta; Dinophyceae; Dinophyceae_X; Dinophyceae_XX; Dinophyceae_XXX; Dinophyceae_XXX_sp.;	0.665475	0.665475	0.665475	1	1	19	0	0.019	0.734673	0.00034	0.734673	0.00034	0	0.720492	0.000502	0.720492	0.000502	0	0.097312	0.003994	0	0.004813	1e-06	25	64
Alveolates-Ciliates_Alveolates-Dinoflagellates	GU819492.1.1175_U	Alveolates-Ciliates	Spirotrichea	Eukaryota; Alveolata; Ciliophora; Spirotrichea; Strombidiida; Strombidiidae_J; Strombidiidae_J_X; Strombidiidae_J_X_sp.;	HE611580.1.1746_U	Alveolates-Dinoflagellates	Gyrodinium	Eukaryota; Alveolata; Dinophyta; Dinophyceae; Dinophyceae_X; Dinophyceae_XX; Gyrodinium; Gyrodinium_sp.;	-0.799588	-0.799588	-0.799588	1	1	19	0	0	-0.815196	2.1e-05	-0.815196	2.1e-05	0	-0.846795	5e-06	-0.846795	5e-06	0	0	0.000589	0	0.000244	0	25	65
Alveolates-Ciliates_Alveolates-Dinoflagellates	GU819492.1.1175_U	Alveolates-Ciliates	Spirotrichea	Eukaryota; Alveolata; Ciliophora; Spirotrichea; Strombidiida; Strombidiidae_J; Strombidiidae_J_X; Strombidiidae_J_X_sp.;	HM581766.1.1782_U	Alveolates-Dinoflagellates	Prorocentrum	Eukaryota; Alveolata; Dinophyta; Dinophyceae; Dinophyceae_X; Dinophyceae_XX; Prorocentrum; Prorocentrum_sp.;	-0.80926	-0.80926	-0.80926	2	2	18	0	0.001	-0.853317	3e-06	-0.853317	3e-06	0	-0.860904	2e-06	-0.860904	2e-06	0	0.017494	0.000178	0	0.000161	0	25	66
Alveolates-Ciliates_Alveolates-Ciliates	GU819492.1.1175_U	Alveolates-Ciliates	Spirotrichea	Eukaryota; Alveolata; Ciliophora; Spirotrichea; Strombidiida; Strombidiidae_J; Strombidiidae_J_X; Strombidiidae_J_X_sp.;	JX188331.1.1726_U	Alveolates-Ciliates	Oligohymenophorea	Eukaryota; Alveolata; Ciliophora; Oligohymenophorea; Scuticociliatia; Scuticociliatia-1; Scuticociliatia-1_X; Scuticociliatia-1_X_sp.;	0.639161	0.639161	0.639161	2	2	18	0	0.034	0.683157	0.001264	0.683157	0.001264	0	0.682756	0.001276	0.682756	0.001276	0	0.133349	0.009535	1e-06	0.009091	1e-06	25	69
Alveolates-Ciliates_Alveolates-Dinoflagellates	GU819492.1.1175_U	Alveolates-Ciliates	Spirotrichea	Eukaryota; Alveolata; Ciliophora; Spirotrichea; Strombidiida; Strombidiidae_J; Strombidiidae_J_X; Strombidiidae_J_X_sp.;	HM561067.1.974_U	Alveolates-Dinoflagellates	Dinophyceae	Eukaryota; Alveolata; Dinophyta; Dinophyceae; Dinophyceae_X; Dinophyceae_XX; Dinophyceae_XXX; Dinophyceae_XXX_sp.;	0.654687	0.654687	0.654687	1	1	19	0	0.027	0.790679	5.6e-05	0.790679	5.6e-05	0	0.726635	0.000426	0.726635	0.000426	0	0.118689	0.001157	0	0.004292	1e-06	25	71
Alveolates-Ciliates_Alveolates-Ciliates	GU819492.1.1175_U	Alveolates-Ciliates	Spirotrichea	Eukaryota; Alveolata; Ciliophora; Spirotrichea; Strombidiida; Strombidiidae_J; Strombidiidae_J_X; Strombidiidae_J_X_sp.;	KF129779.1.1734_U	Alveolates-Ciliates	Spirotrichea	Eukaryota; Alveolata; Ciliophora; Spirotrichea; Strombidiida; Tontoniidae_A; Spirotontonia; Spirotontonia_sp.;	-0.642658	-0.642658	-0.642658	4	1	16	3	0.046	0.209771	0.388719	-0.672218	0.004336	3	0.11233	0.647062	-0.706402	0.002222	3	0.154843	0.36185	2e-06	0.509076	1e-06	25	72
Alveolates-Ciliates_Alveolates-Ciliates	GU819492.1.1175_U	Alveolates-Ciliates	Spirotrichea	Eukaryota; Alveolata; Ciliophora; Spirotrichea; Strombidiida; Strombidiidae_J; Strombidiidae_J_X; Strombidiidae_J_X_sp.;	AY665059.1.1720_U	Alveolates-Ciliates	Oligohymenophorea	Eukaryota; Alveolata; Ciliophora; Oligohymenophorea; Scuticociliatia; Scuticociliatia-1; Scuticociliatia-1_X; Scuticociliatia-1_X_sp.;	0.725576	0.725576	0.725576	1	1	19	0	0.005	0.814931	2.1e-05	0.814931	2.1e-05	0	0.775241	9.7e-05	0.775241	9.7e-05	0	0.0456	0.000591	0	0.001669	0	25	77
Alveolates-Ciliates_Rhizaria-Acantharia	GU819492.1.1175_U	Alveolates-Ciliates	Spirotrichea	Eukaryota; Alveolata; Ciliophora; Spirotrichea; Strombidiida; Strombidiidae_J; Strombidiidae_J_X; Strombidiidae_J_X_sp.;	HM561210.1.973_U	Rhizaria-Acantharia	Acantharea	Eukaryota; Rhizaria; Radiolaria; Acantharea; Acantharea_X; Acantharea_XX; Acantharea_XXX; Acantharea_XXX_sp.;	0.680152	0.680152	0.680152	1	1	19	0	0.014	0.807922	2.9e-05	0.807922	2.9e-05	0	0.773925	0.000101	0.773925	0.000101	0	0.081741	0.000722	0	0.001705	0	25	80
Alveolates-Ciliates_Archaeplastids-Chlorophytes	GU819492.1.1175_U	Alveolates-Ciliates	Spirotrichea	Eukaryota; Alveolata; Ciliophora; Spirotrichea; Strombidiida; Strombidiidae_J; Strombidiidae_J_X; Strombidiidae_J_X_sp.;	EU143529.1.906_U	Archaeplastids-Chlorophytes	Pyramimonadales	Eukaryota; Archaeplastida; Chlorophyta; Pyramimonadales; Pyramimonadales_X; Pyramimonadales_XX; Pterosperma; Pterosperma_sp.;	-0.781967	-0.781967	-0.781967	1	1	19	0	0.001	-0.766485	0.000129	-0.766485	0.000129	0	-0.856829	3e-06	-0.856829	3e-06	0	0.017494	0.002065	0	0.000181	0	25	84
Alveolates-Ciliates_Alveolates-Ciliates	GU819492.1.1175_U	Alveolates-Ciliates	Spirotrichea	Eukaryota; Alveolata; Ciliophora; Spirotrichea; Strombidiida; Strombidiidae_J; Strombidiidae_J_X; Strombidiidae_J_X_sp.;	JX567497.1.1529_U	Alveolates-Ciliates	Spirotrichea	Eukaryota; Alveolata; Ciliophora; Spirotrichea; Tintinnida; Tintinnidae; Steenstrupiella; Steenstrupiella_steenstrupii;	0.631734	0.631734	0.631734	1	2	18	-1	0.037	0.212745	0.381872	0.652988	0.003302	-1	0.243624	0.314854	0.631525	0.004937	-1	0.139515	0.358426	2e-06	0.347394	2e-06	25	85
Alveolates-Ciliates_Alveolates-Ciliates	GU819492.1.1175_U	Alveolates-Ciliates	Spirotrichea	Eukaryota; Alveolata; Ciliophora; Spirotrichea; Strombidiida; Strombidiidae_J; Strombidiidae_J_X; Strombidiidae_J_X_sp.;	KJ759492.1.1752_U	Alveolates-Ciliates	Phyllopharyngea	Eukaryota; Alveolata; Ciliophora; Phyllopharyngea; Cyrtophoria; Chlamydodontidae; Chlamydodon; Chlamydodon_sp.;	0.715431	0.715431	0.715431	5	5	15	0	0.003	0.650984	0.002538	0.650984	0.002538	0	0.712593	0.000618	0.712593	0.000618	0	0.033974	0.01518	1e-06	0.005531	1e-06	25	93
Alveolates-Ciliates_Alveolates-Dinoflagellates	GU819492.1.1175_U	Alveolates-Ciliates	Spirotrichea	Eukaryota; Alveolata; Ciliophora; Spirotrichea; Strombidiida; Strombidiidae_J; Strombidiidae_J_X; Strombidiidae_J_X_sp.;	EU793087.1.924_U	Alveolates-Dinoflagellates	Dinophyceae	Eukaryota; Alveolata; Dinophyta; Dinophyceae; Dinophyceae_X; Dinophyceae_XX; Dinophyceae_XXX; Dinophyceae_XXX_sp.;	-0.71857	-0.71857	-0.71857	1	1	19	0	0.007	-0.752954	0.000199	-0.752954	0.000199	0	-0.774901	9.8e-05	-0.774901	9.8e-05	0	0.055193	0.002735	0	0.001676	0	25	97
Alveolates-Ciliates_Alveolates-Ciliates	GU819492.1.1175_U	Alveolates-Ciliates	Spirotrichea	Eukaryota; Alveolata; Ciliophora; Spirotrichea; Strombidiida; Strombidiidae_J; Strombidiidae_J_X; Strombidiidae_J_X_sp.;	HQ867071.1.870_U	Alveolates-Ciliates	Spirotrichea	Eukaryota; Alveolata; Ciliophora; Spirotrichea; Strombidiida_G; Strombidiida_G_X; Strombidiida_G_XX; Strombidiida_G_XX_sp.;	-0.648828	-0.648828	-0.648828	7	1	13	6	0.037	-0.646947	0.002755	-0.646947	0.002755	0	-0.578578	0.009452	-0.741758	0.003701	6	0.139515	0.016052	2e-06	0.035592	2e-06	25	106
Alveolates-Ciliates_Alveolates-Syndiniales	GU819492.1.1175_U	Alveolates-Ciliates	Spirotrichea	Eukaryota; Alveolata; Ciliophora; Spirotrichea; Strombidiida; Strombidiidae_J; Strombidiidae_J_X; Strombidiidae_J_X_sp.;	EU793278.1.1575_U	Alveolates-Syndiniales	Dino-Group-II	Eukaryota; Alveolata; Dinophyta; Syndiniales; Dino-Group-II; Dino-Group-II-Clade-6; Dino-Group-II-Clade-6_X; Dino-Group-II-Clade-6_X_sp.;	0.751509	0.751509	0.751509	1	1	17	0	0.003	0.802334	3.6e-05	0.802334	3.6e-05	0	0.749672	0.00022	0.749672	0.00022	0	0.033974	0.000853	0	0.002798	0	25	109
Alveolates-Ciliates_Alveolates-Dinoflagellates	GU819492.1.1175_U	Alveolates-Ciliates	Spirotrichea	Eukaryota; Alveolata; Ciliophora; Spirotrichea; Strombidiida; Strombidiidae_J; Strombidiidae_J_X; Strombidiidae_J_X_sp.;	AY664921.1.1754_U	Alveolates-Dinoflagellates	Prorocentrum	Eukaryota; Alveolata; Dinophyta; Dinophyceae; Dinophyceae_X; Dinophyceae_XX; Prorocentrum; Prorocentrum_sp.;	-0.849698	-0.849698	-0.849698	2	2	18	0	0	-0.759833	0.00016	-0.759833	0.00016	0	-0.859965	2e-06	-0.859965	2e-06	0	0	0.002386	0	0.000162	0	25	111
Alveolates-Ciliates_Alveolates-Ciliates	GU819492.1.1175_U	Alveolates-Ciliates	Spirotrichea	Eukaryota; Alveolata; Ciliophora; Spirotrichea; Strombidiida; Strombidiidae_J; Strombidiidae_J_X; Strombidiidae_J_X_sp.;	DQ120009.1.1729_U	Alveolates-Ciliates	Litostomatea	Eukaryota; Alveolata; Ciliophora; Litostomatea; Cyclotrichia; Cyclotrichia_X; Cyclotrichia_XX; Cyclotrichia_XX_sp.;	0.774336	0.774336	0.774336	1	1	19	0	0	0.819675	1.7e-05	0.819675	1.7e-05	0	0.848618	4e-06	0.848618	4e-06	0	0	0.000515	0	0.000234	0	25	113
Alveolates-Ciliates_Alveolates-Dinoflagellates	GU819492.1.1175_U	Alveolates-Ciliates	Spirotrichea	Eukaryota; Alveolata; Ciliophora; Spirotrichea; Strombidiida; Strombidiidae_J; Strombidiidae_J_X; Strombidiidae_J_X_sp.;	FN690221.1.1692_U	Alveolates-Dinoflagellates	Dinophyceae	Eukaryota; Alveolata; Dinophyta; Dinophyceae; Dinophyceae_X; Dinophyceae_XX; Dinophyceae_XXX; Dinophyceae_XXX_sp.;	-0.838336	-0.838336	-0.838336	1	1	19	0	0	-0.799141	4.1e-05	-0.799141	4.1e-05	0	-0.878456	1e-06	-0.878456	1e-06	0	0	0.000935	0	9.1e-05	0	25	118
Alveolates-Ciliates_Stramenopiles-Other	GU819492.1.1175_U	Alveolates-Ciliates	Spirotrichea	Eukaryota; Alveolata; Ciliophora; Spirotrichea; Strombidiida; Strombidiidae_J; Strombidiidae_J_X; Strombidiidae_J_X_sp.;	EF695169.1.817_U	Stramenopiles-Other	Florenciellales	Eukaryota; Stramenopiles; Ochrophyta; Dictyochophyceae; Dictyochophyceae_X; Florenciellales; Florenciellales_X; Florenciellales_X_sp.;	-0.667364	-0.667364	-0.667364	2	3	17	-1	0.023	-0.735204	0.000335	-0.735204	0.000335	0	-0.61633	0.004952	-0.633264	0.004784	-1	0.108834	0.003963	0	0.022531	2e-06	25	121
Alveolates-Ciliates_Alveolates-Ciliates	GU819492.1.1175_U	Alveolates-Ciliates	Spirotrichea	Eukaryota; Alveolata; Ciliophora; Spirotrichea; Strombidiida; Strombidiidae_J; Strombidiidae_J_X; Strombidiidae_J_X_sp.;	KJ759417.1.1743_U	Alveolates-Ciliates	Spirotrichea	Eukaryota; Alveolata; Ciliophora; Spirotrichea; Choreotrichida; Leegaardiellidae_B; Leegaardiella; Leegaardiella_sp.;	-0.623358	-0.623358	-0.623358	3	1	16	2	0.046	0.118348	0.629419	-0.594722	0.0118	2	0.070361	0.774703	-0.658073	0.004082	2	0.154843	0.465483	3e-06	0.55643	2e-06	25	124
Alveolates-Ciliates_Alveolates-Ciliates	GU819492.1.1175_U	Alveolates-Ciliates	Spirotrichea	Eukaryota; Alveolata; Ciliophora; Spirotrichea; Strombidiida; Strombidiidae_J; Strombidiidae_J_X; Strombidiidae_J_X_sp.;	KC582955.1.1774_U	Alveolates-Ciliates	Spirotrichea	Eukaryota; Alveolata; Ciliophora; Spirotrichea; Strombidiida; Strombidiida_X; Strombidiida_XX; Strombidiida_XX_sp.;	0.675636	0.675636	0.675636	1	1	19	0	0.012	0.677024	0.001453	0.677024	0.001453	0	0.727512	0.000415	0.727512	0.000415	0	0.074959	0.010453	1e-06	0.004217	0	25	125
Alveolates-Ciliates_Alveolates-Syndiniales	GU819492.1.1175_U	Alveolates-Ciliates	Spirotrichea	Eukaryota; Alveolata; Ciliophora; Spirotrichea; Strombidiida; Strombidiidae_J; Strombidiidae_J_X; Strombidiidae_J_X_sp.;	GU824677.1.1204_U	Alveolates-Syndiniales	Dino-Group-II	Eukaryota; Alveolata; Dinophyta; Syndiniales; Dino-Group-II; Dino-Group-II-Clade-10-and-11; Dino-Group-II-Clade-10-and-11_X; Dino-Group-II-Clade-10-and-11_X_sp.;	0.7997	0.7997	0.7997	1	1	19	0	0.002	0.789256	5.9e-05	0.789256	5.9e-05	0	0.809398	2.7e-05	0.809398	2.7e-05	0	0.026563	0.001202	0	0.000717	0	25	135
Alveolates-Ciliates_Stramenopiles-Diatoms	GU819492.1.1175_U	Alveolates-Ciliates	Spirotrichea	Eukaryota; Alveolata; Ciliophora; Spirotrichea; Strombidiida; Strombidiidae_J; Strombidiidae_J_X; Strombidiidae_J_X_sp.;	GU822947.1.1074_U	Stramenopiles-Diatoms	Haslea	Eukaryota; Stramenopiles; Ochrophyta; Bacillariophyta; Bacillariophyta_X; Raphid-pennate; Haslea; Haslea_sp.;	0.692927	0.692927	0.692927	2	2	18	0	0.006	0.665702	0.001864	0.665702	0.001864	0	0.685112	0.001208	0.685112	0.001208	0	0.050667	0.012398	1e-06	0.008721	1e-06	25	139
Alveolates-Ciliates_Stramenopiles-Chrysophytes	GU819492.1.1175_U	Alveolates-Ciliates	Spirotrichea	Eukaryota; Alveolata; Ciliophora; Spirotrichea; Strombidiida; Strombidiidae_J; Strombidiidae_J_X; Strombidiidae_J_X_sp.;	KC582997.1.1775_U	Stramenopiles-Chrysophytes	Chrysophyceae_Clade-I	Eukaryota; Stramenopiles; Ochrophyta; Chrysophyceae; Chrysophyceae_X; Chrysophyceae_Clade-I; Chrysophyceae_Clade-I_X; Chrysophyceae_Clade-I_X_sp.;	0.760396	0.760396	0.760396	1	1	19	0	0.002	0.820043	1.7e-05	0.820043	1.7e-05	0	0.793937	4.9e-05	0.793937	4.9e-05	0	0.026563	0.000515	0	0.001055	0	25	142
Alveolates-Ciliates_Stramenopiles-Diatoms	GU819492.1.1175_U	Alveolates-Ciliates	Spirotrichea	Eukaryota; Alveolata; Ciliophora; Spirotrichea; Strombidiida; Strombidiidae_J; Strombidiidae_J_X; Strombidiidae_J_X_sp.;	EU499988.1.803_U	Stramenopiles-Diatoms	Raphid-pennate	Eukaryota; Stramenopiles; Ochrophyta; Bacillariophyta; Bacillariophyta_X; Raphid-pennate; Raphid-pennate_X; Raphid-pennate_X_sp.;	0.780096	0.780096	0.780096	1	1	19	0	0	0.8803	1e-06	0.8803	1e-06	0	0.81176	2.4e-05	0.81176	2.4e-05	0	0	7.1e-05	0	0.000672	0	25	145
Alveolates-Ciliates_Stramenopiles-MAST	GU819492.1.1175_U	Alveolates-Ciliates	Spirotrichea	Eukaryota; Alveolata; Ciliophora; Spirotrichea; Strombidiida; Strombidiidae_J; Strombidiidae_J_X; Strombidiidae_J_X_sp.;	AJ402350.1.1758_U	Stramenopiles-MAST	MAST-1	Eukaryota; Stramenopiles; Stramenopiles_X; MAST; MAST-1; MAST-1D; MAST-1D_X; MAST-1D_X_sp.;	-0.717327	-0.717327	-0.717327	1	1	19	0	0.003	-0.834703	9e-06	-0.834703	9e-06	0	-0.795435	4.7e-05	-0.795435	4.7e-05	0	0.033974	0.000337	0	0.001032	0	25	150
Alveolates-Syndiniales_Alveolates-Ciliates	FJ431723.1.830_U	Alveolates-Syndiniales	Dino-Group-III	Eukaryota; Alveolata; Dinophyta; Syndiniales; Dino-Group-III; Dino-Group-III_X; Dino-Group-III_XX; Dino-Group-III_XX_sp.;	KJ762491.1.1777_U	Alveolates-Ciliates	Spirotrichea	Eukaryota; Alveolata; Ciliophora; Spirotrichea; Strombidiida; Strombidiidae; Strombidiidae_X; Strombidiidae_X_sp.;	0.68394	0.68394	0.68394	2	2	18	0	0.014	0.625985	0.004143	0.625985	0.004143	0	0.614319	0.005135	0.614319	0.005135	0	0.081741	0.021035	2e-06	0.023193	2e-06	27	30
Alveolates-Syndiniales_Alveolates-Dinoflagellates	FJ431723.1.830_U	Alveolates-Syndiniales	Dino-Group-III	Eukaryota; Alveolata; Dinophyta; Syndiniales; Dino-Group-III; Dino-Group-III_X; Dino-Group-III_XX; Dino-Group-III_XX_sp.;	GU825315.1.1202_U	Alveolates-Dinoflagellates	Dinophyceae	Eukaryota; Alveolata; Dinophyta; Dinophyceae; Dinophyceae_X; Dinophyceae_XX; Dinophyceae_XXX; Dinophyceae_XXX_sp.;	0.837704	0.837704	0.837704	1	1	19	0	0	0.912006	0	0.912006	0	0	0.857394	3e-06	0.857394	3e-06	0	0	1.6e-05	0	0.000178	0	27	32
Alveolates-Syndiniales_Alveolates-Ciliates	FJ431723.1.830_U	Alveolates-Syndiniales	Dino-Group-III	Eukaryota; Alveolata; Dinophyta; Syndiniales; Dino-Group-III; Dino-Group-III_X; Dino-Group-III_XX; Dino-Group-III_XX_sp.;	KY290313.1.1621_U	Alveolates-Ciliates	Spirotrichea	Eukaryota; Alveolata; Ciliophora; Spirotrichea; Choreotrichida; Leegaardiellidae_B; Leegaardiella; Leegaardiella_sp.;	-0.610881	-0.610881	-0.610881	1	1	19	0	0.044	-0.548216	0.01509	-0.548216	0.01509	0	-0.641916	0.003047	-0.641916	0.003047	0	0.151655	0.048208	3e-06	0.016332	2e-06	27	36
Alveolates-Syndiniales_Stramenopiles-MAST	FJ431723.1.830_U	Alveolates-Syndiniales	Dino-Group-III	Eukaryota; Alveolata; Dinophyta; Syndiniales; Dino-Group-III; Dino-Group-III_X; Dino-Group-III_XX; Dino-Group-III_XX_sp.;	JQ782004.1.1784_U	Stramenopiles-MAST	MAST-1	Eukaryota; Stramenopiles; Stramenopiles_X; MAST; MAST-1; MAST-1C; MAST-1C_X; MAST-1C_X_sp.;	0.601832	0.601832	0.601832	2	2	17	0	0.047	0.680188	0.001353	0.680188	0.001353	0	0.549407	0.014828	0.549407	0.014828	0	0.156743	0.010002	1e-06	0.048935	3e-06	27	37
Alveolates-Syndiniales_Stramenopiles-MAST	FJ431723.1.830_U	Alveolates-Syndiniales	Dino-Group-III	Eukaryota; Alveolata; Dinophyta; Syndiniales; Dino-Group-III; Dino-Group-III_X; Dino-Group-III_XX; Dino-Group-III_XX_sp.;	KF129967.1.1739_U	Stramenopiles-MAST	MAST-9	Eukaryota; Stramenopiles; Stramenopiles_X; MAST; MAST-9; MAST-9A; MAST-9A_X; MAST-9A_X_sp.;	-0.803103	-0.803103	-0.803103	2	2	17	0	0	-0.791244	5.5e-05	-0.791244	5.5e-05	0	-0.774363	0.0001	-0.774363	0.0001	0	0	0.001146	0	0.001696	0	27	38
Alveolates-Syndiniales_Stramenopiles-MAST	FJ431723.1.830_U	Alveolates-Syndiniales	Dino-Group-III	Eukaryota; Alveolata; Dinophyta; Syndiniales; Dino-Group-III; Dino-Group-III_X; Dino-Group-III_XX; Dino-Group-III_XX_sp.;	HM163291.1.1682_U	Stramenopiles-MAST	MAST-3	Eukaryota; Stramenopiles; Stramenopiles_X; MAST; MAST-3; MAST-3I; MAST-3I_X; MAST-3I_X_sp.;	-0.772416	-0.772416	-0.772416	1	1	16	0	0	-0.703957	0.000769	-0.703957	0.000769	0	-0.758227	0.000169	-0.758227	0.000169	0	0	0.006773	1e-06	0.002374	0	27	39
Alveolates-Syndiniales_Alveolates-Dinoflagellates	FJ431723.1.830_U	Alveolates-Syndiniales	Dino-Group-III	Eukaryota; Alveolata; Dinophyta; Syndiniales; Dino-Group-III; Dino-Group-III_X; Dino-Group-III_XX; Dino-Group-III_XX_sp.;	KF129831.1.1758_U	Alveolates-Dinoflagellates	Dinophyceae	Eukaryota; Alveolata; Dinophyta; Dinophyceae; Dinophyceae_X; Dinophyceae_XX; Dinophyceae_XXX; Dinophyceae_XXX_sp.;	0.884439	0.884439	0.884439	1	1	19	0	0	0.851741	4e-06	0.851741	4e-06	0	0.900991	0	0.900991	0	0	0	0.000189	0	3.3e-05	0	27	40
Alveolates-Syndiniales_Alveolates-Dinoflagellates	FJ431723.1.830_U	Alveolates-Syndiniales	Dino-Group-III	Eukaryota; Alveolata; Dinophyta; Syndiniales; Dino-Group-III; Dino-Group-III_X; Dino-Group-III_XX; Dino-Group-III_XX_sp.;	FJ217814.1.1521_U	Alveolates-Dinoflagellates	Azadinium	Eukaryota; Alveolata; Dinophyta; Dinophyceae; Dinophyceae_X; Dinophyceae_XX; Azadinium; Azadinium_spinosum;	0.863917	0.863917	0.863917	1	1	18	0	0	0.854574	3e-06	0.854574	3e-06	0	0.86216	2e-06	0.86216	2e-06	0	0	0.000175	0	0.000155	0	27	43
Alveolates-Syndiniales_Stramenopiles-MAST	FJ431723.1.830_U	Alveolates-Syndiniales	Dino-Group-III	Eukaryota; Alveolata; Dinophyta; Syndiniales; Dino-Group-III; Dino-Group-III_X; Dino-Group-III_XX; Dino-Group-III_XX_sp.;	AB771842.1.1677_U	Stramenopiles-MAST	MAST-2	Eukaryota; Stramenopiles; Stramenopiles_X; MAST; MAST-2; MAST-2A; MAST-2A_X; MAST-2A_X_sp.;	-0.629095	-0.629095	-0.629095	5	1	11	4	0.032	0.211118	0.385609	-0.735596	0.001774	4	0.171747	0.482022	-0.816662	0.000203	4	0.129095	0.360105	1e-06	0.438268	0	27	49
Alveolates-Syndiniales_Stramenopiles-Pelagophytes	FJ431723.1.830_U	Alveolates-Syndiniales	Dino-Group-III	Eukaryota; Alveolata; Dinophyta; Syndiniales; Dino-Group-III; Dino-Group-III_X; Dino-Group-III_XX; Dino-Group-III_XX_sp.;	GU196150.1.1374_U	Stramenopiles-Pelagophytes	Pelagomonadaceae_clade_A	Eukaryota; Stramenopiles; Ochrophyta; Pelagophyceae; Pelagomonadales; Pelagomonadaceae; Pelagomonadaceae_clade_A; Pelagomonadaceae_clade_A_sp.;	0.662016	0.662016	0.662016	2	2	17	0	0.024	0.798277	4.2e-05	0.798277	4.2e-05	0	0.659939	0.002108	0.659939	0.002108	0	0.111069	0.000964	0	0.012711	1e-06	27	52
Alveolates-Syndiniales_Alveolates-Dinoflagellates	FJ431723.1.830_U	Alveolates-Syndiniales	Dino-Group-III	Eukaryota; Alveolata; Dinophyta; Syndiniales; Dino-Group-III; Dino-Group-III_X; Dino-Group-III_XX; Dino-Group-III_XX_sp.;	HM581705.1.1793_U	Alveolates-Dinoflagellates	Dinophyceae	Eukaryota; Alveolata; Dinophyta; Dinophyceae; Dinophyceae_X; Dinophyceae_XX; Dinophyceae_XXX; Dinophyceae_XXX_sp.;	0.855591	0.855591	0.855591	1	1	19	0	0	0.835233	9e-06	0.835233	9e-06	0	0.891133	0	0.891133	0	0	0	0.000333	0	5.4e-05	0	27	55
Alveolates-Syndiniales_Stramenopiles-MAST	FJ431723.1.830_U	Alveolates-Syndiniales	Dino-Group-III	Eukaryota; Alveolata; Dinophyta; Syndiniales; Dino-Group-III; Dino-Group-III_X; Dino-Group-III_XX; Dino-Group-III_XX_sp.;	GU823216.1.1365_U	Stramenopiles-MAST	MAST-3	Eukaryota; Stramenopiles; Stramenopiles_X; MAST; MAST-3; MAST-3I; MAST-3I_X; MAST-3I_X_sp.;	-0.88166	-0.88166	-0.88166	1	1	18	0	0	-0.85781	3e-06	-0.85781	3e-06	0	-0.855639	3e-06	-0.855639	3e-06	0	0	0.000156	0	0.000189	0	27	61
Alveolates-Syndiniales_Alveolates-Dinoflagellates	FJ431723.1.830_U	Alveolates-Syndiniales	Dino-Group-III	Eukaryota; Alveolata; Dinophyta; Syndiniales; Dino-Group-III; Dino-Group-III_X; Dino-Group-III_XX; Dino-Group-III_XX_sp.;	HE611580.1.1746_U	Alveolates-Dinoflagellates	Gyrodinium	Eukaryota; Alveolata; Dinophyta; Dinophyceae; Dinophyceae_X; Dinophyceae_XX; Gyrodinium; Gyrodinium_sp.;	0.833335	0.833335	0.833335	3	3	16	0	0	0.831979	1e-05	0.831979	1e-05	0	0.794557	4.8e-05	0.794557	4.8e-05	0	0	0.000367	0	0.001044	0	27	65
Alveolates-Syndiniales_Alveolates-Dinoflagellates	FJ431723.1.830_U	Alveolates-Syndiniales	Dino-Group-III	Eukaryota; Alveolata; Dinophyta; Syndiniales; Dino-Group-III; Dino-Group-III_X; Dino-Group-III_XX; Dino-Group-III_XX_sp.;	HM581766.1.1782_U	Alveolates-Dinoflagellates	Prorocentrum	Eukaryota; Alveolata; Dinophyta; Dinophyceae; Dinophyceae_X; Dinophyceae_XX; Prorocentrum; Prorocentrum_sp.;	0.721743	0.721743	0.721743	1	1	18	0	0.003	0.781636	7.7e-05	0.781636	7.7e-05	0	0.766126	0.000131	0.766126	0.000131	0	0.033974	0.001443	0	0.002012	0	27	66
Alveolates-Syndiniales_Alveolates-Dinoflagellates	FJ431723.1.830_U	Alveolates-Syndiniales	Dino-Group-III	Eukaryota; Alveolata; Dinophyta; Syndiniales; Dino-Group-III; Dino-Group-III_X; Dino-Group-III_XX; Dino-Group-III_XX_sp.;	EU500118.1.810_U	Alveolates-Dinoflagellates	Gymnodinium	Eukaryota; Alveolata; Dinophyta; Dinophyceae; Dinophyceae_X; Dinophyceae_XX; Gymnodinium; Gymnodinium_sp.;	0.700746	0.700746	0.700746	1	1	18	0	0.009	0.794649	4.8e-05	0.794649	4.8e-05	0	0.747147	0.000237	0.747147	0.000237	0	0.063892	0.001065	0	0.002924	0	27	67
Alveolates-Syndiniales_Alveolates-Ciliates	FJ431723.1.830_U	Alveolates-Syndiniales	Dino-Group-III	Eukaryota; Alveolata; Dinophyta; Syndiniales; Dino-Group-III; Dino-Group-III_X; Dino-Group-III_XX; Dino-Group-III_XX_sp.;	JX188331.1.1726_U	Alveolates-Ciliates	Oligohymenophorea	Eukaryota; Alveolata; Ciliophora; Oligohymenophorea; Scuticociliatia; Scuticociliatia-1; Scuticociliatia-1_X; Scuticociliatia-1_X_sp.;	-0.640953	-0.640953	-0.640953	1	1	18	0	0.02	-0.726571	0.000426	-0.726571	0.000426	0	-0.658183	0.002187	-0.658183	0.002187	0	0.100183	0.004582	1e-06	0.013067	1e-06	27	69
Alveolates-Syndiniales_Stramenopiles-MAST	FJ431723.1.830_U	Alveolates-Syndiniales	Dino-Group-III	Eukaryota; Alveolata; Dinophyta; Syndiniales; Dino-Group-III; Dino-Group-III_X; Dino-Group-III_XX; Dino-Group-III_XX_sp.;	GQ863785.1.1606_U	Stramenopiles-MAST	MAST-3	Eukaryota; Stramenopiles; Stramenopiles_X; MAST; MAST-3; MAST-3A; MAST-3A_X; MAST-3A_X_sp.;	-0.622659	-0.622659	-0.622659	1	1	18	0	0.032	-0.518035	0.023085	-0.628841	0.015996	5	-0.59877	0.006754	-0.641679	0.013371	5	0.129095	0.064127	3e-06	0.028053	3e-06	27	70
Alveolates-Syndiniales_Alveolates-Ciliates	FJ431723.1.830_U	Alveolates-Syndiniales	Dino-Group-III	Eukaryota; Alveolata; Dinophyta; Syndiniales; Dino-Group-III; Dino-Group-III_X; Dino-Group-III_XX; Dino-Group-III_XX_sp.;	AY665059.1.1720_U	Alveolates-Ciliates	Oligohymenophorea	Eukaryota; Alveolata; Ciliophora; Oligohymenophorea; Scuticociliatia; Scuticociliatia-1; Scuticociliatia-1_X; Scuticociliatia-1_X_sp.;	-0.645787	-0.645787	-0.645787	2	2	17	0	0.024	-0.699155	0.000865	-0.699155	0.000865	0	-0.680421	0.001346	-0.680421	0.001346	0	0.111069	0.007281	1e-06	0.009389	1e-06	27	77
Alveolates-Syndiniales_Rhizaria-Acantharia	FJ431723.1.830_U	Alveolates-Syndiniales	Dino-Group-III	Eukaryota; Alveolata; Dinophyta; Syndiniales; Dino-Group-III; Dino-Group-III_X; Dino-Group-III_XX; Dino-Group-III_XX_sp.;	HM561210.1.973_U	Rhizaria-Acantharia	Acantharea	Eukaryota; Rhizaria; Radiolaria; Acantharea; Acantharea_X; Acantharea_XX; Acantharea_XXX; Acantharea_XXX_sp.;	-0.812738	-0.812738	-0.812738	2	2	17	0	0	-0.833147	9e-06	-0.833147	9e-06	0	-0.783582	7.2e-05	-0.783582	7.2e-05	0	0	0.000353	0	0.001367	0	27	80
Alveolates-Syndiniales_Archaeplastids-Chlorophytes	FJ431723.1.830_U	Alveolates-Syndiniales	Dino-Group-III	Eukaryota; Alveolata; Dinophyta; Syndiniales; Dino-Group-III; Dino-Group-III_X; Dino-Group-III_XX; Dino-Group-III_XX_sp.;	EU143529.1.906_U	Archaeplastids-Chlorophytes	Pyramimonadales	Eukaryota; Archaeplastida; Chlorophyta; Pyramimonadales; Pyramimonadales_X; Pyramimonadales_XX; Pterosperma; Pterosperma_sp.;	0.678521	0.678521	0.678521	2	2	17	0	0.017	0.663261	0.001964	0.663261	0.001964	0	0.697409	0.000903	-0.723366	0.002304	4	0.091523	0.012867	1e-06	0.007221	1e-06	27	84
Alveolates-Syndiniales_Alveolates-Ciliates	FJ431723.1.830_U	Alveolates-Syndiniales	Dino-Group-III	Eukaryota; Alveolata; Dinophyta; Syndiniales; Dino-Group-III; Dino-Group-III_X; Dino-Group-III_XX; Dino-Group-III_XX_sp.;	HQ866199.1.872_U	Alveolates-Ciliates	Spirotrichea	Eukaryota; Alveolata; Ciliophora; Spirotrichea; Strombidiida_F; Strombidiida_F_X; Strombidiida_F_XX; Strombidiida_F_XX_sp.;	0.613875	0.613875	0.613875	1	1	19	0	0.043	0.611575	0.005395	0.611575	0.005395	0	0.627744	0.004008	0.627744	0.004008	0	0.150291	0.024896	2e-06	0.019545	2e-06	27	88
Alveolates-Syndiniales_Haptophytes	FJ431723.1.830_U	Alveolates-Syndiniales	Dino-Group-III	Eukaryota; Alveolata; Dinophyta; Syndiniales; Dino-Group-III; Dino-Group-III_X; Dino-Group-III_XX; Dino-Group-III_XX_sp.;	JX680347	Haptophytes	Haptophyta_Clade_HAP3	Eukaryota; Hacrobia; Haptophyta; Haptophyta_Clade_HAP3; Haptophyta_Clade_HAP3_X; Haptophyta_Clade_HAP3_XX; Haptophyta_Clade_HAP3_XXX; Haptophyta_Clade_HAP3_XXX_sp.;	0.660611	0.660611	0.660611	1	1	18	0	0.018	0.717287	0.000547	0.717287	0.000547	0	0.721124	0.000494	0.721124	0.000494	0	0.094526	0.005359	1e-06	0.004758	1e-06	27	94
Alveolates-Syndiniales_Alveolates-Dinoflagellates	FJ431723.1.830_U	Alveolates-Syndiniales	Dino-Group-III	Eukaryota; Alveolata; Dinophyta; Syndiniales; Dino-Group-III; Dino-Group-III_X; Dino-Group-III_XX; Dino-Group-III_XX_sp.;	EU793087.1.924_U	Alveolates-Dinoflagellates	Dinophyceae	Eukaryota; Alveolata; Dinophyta; Dinophyceae; Dinophyceae_X; Dinophyceae_XX; Dinophyceae_XXX; Dinophyceae_XXX_sp.;	0.818698	0.818698	0.818698	3	3	16	0	0	0.835249	9e-06	0.835249	9e-06	0	0.810004	2.6e-05	0.810004	2.6e-05	0	0	0.000333	0	0.000707	0	27	97
Alveolates-Syndiniales_Alveolates-Ciliates	FJ431723.1.830_U	Alveolates-Syndiniales	Dino-Group-III	Eukaryota; Alveolata; Dinophyta; Syndiniales; Dino-Group-III; Dino-Group-III_X; Dino-Group-III_XX; Dino-Group-III_XX_sp.;	HQ867071.1.870_U	Alveolates-Ciliates	Spirotrichea	Eukaryota; Alveolata; Ciliophora; Spirotrichea; Strombidiida_G; Strombidiida_G_X; Strombidiida_G_XX; Strombidiida_G_XX_sp.;	0.76772	0.76772	0.76772	2	2	17	0	0	0.873366	1e-06	0.873366	1e-06	0	0.762072	0.000149	0.762072	0.000149	0	0	8.7e-05	0	0.002196	0	27	106
Alveolates-Syndiniales_Stramenopiles-MAST	FJ431723.1.830_U	Alveolates-Syndiniales	Dino-Group-III	Eukaryota; Alveolata; Dinophyta; Syndiniales; Dino-Group-III; Dino-Group-III_X; Dino-Group-III_XX; Dino-Group-III_XX_sp.;	EU499985.1.853_U	Stramenopiles-MAST	MAST-7	Eukaryota; Stramenopiles; Stramenopiles_X; MAST; MAST-7; MAST-7B; MAST-7B_X; MAST-7B_X_sp.;	0.628096	0.628096	0.628096	1	1	18	0	0.04	0.7287	0.000402	0.7287	0.000402	0	0.697674	0.000897	0.697674	0.000897	0	0.145146	0.00444	1e-06	0.007199	1e-06	27	110
Alveolates-Syndiniales_Alveolates-Dinoflagellates	FJ431723.1.830_U	Alveolates-Syndiniales	Dino-Group-III	Eukaryota; Alveolata; Dinophyta; Syndiniales; Dino-Group-III; Dino-Group-III_X; Dino-Group-III_XX; Dino-Group-III_XX_sp.;	AY664921.1.1754_U	Alveolates-Dinoflagellates	Prorocentrum	Eukaryota; Alveolata; Dinophyta; Dinophyceae; Dinophyceae_X; Dinophyceae_XX; Prorocentrum; Prorocentrum_sp.;	0.791666	0.791666	0.791666	1	1	18	0	0	0.656538	0.002263	0.656538	0.002263	0	0.832748	1e-05	0.832748	1e-05	0	0	0.014156	1e-06	0.000387	0	27	111
Alveolates-Syndiniales_Alveolates-Ciliates	FJ431723.1.830_U	Alveolates-Syndiniales	Dino-Group-III	Eukaryota; Alveolata; Dinophyta; Syndiniales; Dino-Group-III; Dino-Group-III_X; Dino-Group-III_XX; Dino-Group-III_XX_sp.;	DQ120009.1.1729_U	Alveolates-Ciliates	Litostomatea	Eukaryota; Alveolata; Ciliophora; Litostomatea; Cyclotrichia; Cyclotrichia_X; Cyclotrichia_XX; Cyclotrichia_XX_sp.;	-0.852611	-0.852611	-0.852611	2	2	17	0	0	-0.892373	0	-0.892373	0	0	-0.84072	7e-06	-0.84072	7e-06	0	0	4.4e-05	0	0.000297	0	27	113
Alveolates-Syndiniales_Alveolates-Dinoflagellates	FJ431723.1.830_U	Alveolates-Syndiniales	Dino-Group-III	Eukaryota; Alveolata; Dinophyta; Syndiniales; Dino-Group-III; Dino-Group-III_X; Dino-Group-III_XX; Dino-Group-III_XX_sp.;	AY664894.1.1756_U	Alveolates-Dinoflagellates	Dinophyceae	Eukaryota; Alveolata; Dinophyta; Dinophyceae; Dinophyceae_X; Dinophyceae_XX; Dinophyceae_XXX; Dinophyceae_XXX_sp.;	0.699771	0.699771	0.699771	3	3	16	0	0.008	0.739735	0.000294	0.739735	0.000294	0	0.696797	0.000916	0.696797	0.000916	0	0.059414	0.003612	0	0.007287	1e-06	27	117
Alveolates-Syndiniales_Alveolates-Dinoflagellates	FJ431723.1.830_U	Alveolates-Syndiniales	Dino-Group-III	Eukaryota; Alveolata; Dinophyta; Syndiniales; Dino-Group-III; Dino-Group-III_X; Dino-Group-III_XX; Dino-Group-III_XX_sp.;	FN690221.1.1692_U	Alveolates-Dinoflagellates	Dinophyceae	Eukaryota; Alveolata; Dinophyta; Dinophyceae; Dinophyceae_X; Dinophyceae_XX; Dinophyceae_XXX; Dinophyceae_XXX_sp.;	0.673478	0.673478	0.673478	2	2	18	0	0.011	0.68149	0.001313	0.68149	0.001313	0	0.7319	0.000368	0.7319	0.000368	0	0.071521	0.009792	1e-06	0.00391	0	27	118
Alveolates-Syndiniales_Stramenopiles-MAST	FJ431723.1.830_U	Alveolates-Syndiniales	Dino-Group-III	Eukaryota; Alveolata; Dinophyta; Syndiniales; Dino-Group-III; Dino-Group-III_X; Dino-Group-III_XX; Dino-Group-III_XX_sp.;	KC582992.1.1792_U	Stramenopiles-MAST	MAST-3	Eukaryota; Stramenopiles; Stramenopiles_X; MAST; MAST-3; MAST-3L; MAST-3L_X; MAST-3L_X_sp.;	-0.631108	-0.631108	-0.631108	2	2	17	0	0.031	-0.679726	0.001367	-0.679726	0.001367	0	-0.645303	0.002848	-0.645303	0.002848	0	0.127199	0.010056	1e-06	0.015574	1e-06	27	119
Alveolates-Syndiniales_Stramenopiles-Other	FJ431723.1.830_U	Alveolates-Syndiniales	Dino-Group-III	Eukaryota; Alveolata; Dinophyta; Syndiniales; Dino-Group-III; Dino-Group-III_X; Dino-Group-III_XX; Dino-Group-III_XX_sp.;	EU500153.1.840_U	Stramenopiles-Other	Rhizochromulinales	Eukaryota; Stramenopiles; Ochrophyta; Dictyochophyceae; Dictyochophyceae_X; Rhizochromulinales; Rhizochromulinales_X; Rhizochromulinales_X_sp.;	-0.659448	-0.659448	-0.659448	3	1	13	2	0.016	0.001988	0.993555	-0.65078	0.004667	2	-0.000441	0.998572	-0.63508	0.006159	2	0.088365	0.576595	2e-06	0.623224	2e-06	27	123
Alveolates-Syndiniales_Haptophytes	FJ431723.1.830_U	Alveolates-Syndiniales	Dino-Group-III	Eukaryota; Alveolata; Dinophyta; Syndiniales; Dino-Group-III; Dino-Group-III_X; Dino-Group-III_XX; Dino-Group-III_XX_sp.;	HG970975	Haptophytes	Haptophyta	Eukaryota; Hacrobia; Haptophyta; Haptophyta_X; Haptophyta_XX; Haptophyta_XXX; Haptophyta_XXXX; Haptophyta_XXXX_sp.;	0.698324	0.698324	0.698324	2	2	17	0	0.003	0.762941	0.000145	0.762941	0.000145	0	0.653205	0.002425	0.764788	0.002324	6	0.033974	0.002234	0	0.014074	1e-06	27	126
Alveolates-Syndiniales_Alveolates-Ciliates	FJ431723.1.830_U	Alveolates-Syndiniales	Dino-Group-III	Eukaryota; Alveolata; Dinophyta; Syndiniales; Dino-Group-III; Dino-Group-III_X; Dino-Group-III_XX; Dino-Group-III_XX_sp.;	FJ422993.1.1778_U	Alveolates-Ciliates	Spirotrichea	Eukaryota; Alveolata; Ciliophora; Spirotrichea; Strombidiida; Tontoniidae_B; Pseudotontonia; Pseudotontonia_simplicidens;	0.806451	0.806451	0.806451	1	1	19	0	0.001	0.752321	0.000203	0.752321	0.000203	0	0.788943	6e-05	0.788943	6e-05	0	0.017494	0.002774	0	0.001193	0	27	129
Alveolates-Syndiniales_Alveolates-Syndiniales	FJ431723.1.830_U	Alveolates-Syndiniales	Dino-Group-III	Eukaryota; Alveolata; Dinophyta; Syndiniales; Dino-Group-III; Dino-Group-III_X; Dino-Group-III_XX; Dino-Group-III_XX_sp.;	HQ870498.1.849_U	Alveolates-Syndiniales	Dino-Group-III	Eukaryota; Alveolata; Dinophyta; Syndiniales; Dino-Group-III; Dino-Group-III_X; Dino-Group-III_XX; Dino-Group-III_XX_sp.;	0.801164	0.801164	0.801164	3	3	17	0	0	0.781671	7.7e-05	0.781671	7.7e-05	0	0.705056	0.000748	0.705056	0.000748	0	0	0.001443	0	0.006319	1e-06	27	132
Alveolates-Syndiniales_Alveolates-Syndiniales	FJ431723.1.830_U	Alveolates-Syndiniales	Dino-Group-III	Eukaryota; Alveolata; Dinophyta; Syndiniales; Dino-Group-III; Dino-Group-III_X; Dino-Group-III_XX; Dino-Group-III_XX_sp.;	GU824677.1.1204_U	Alveolates-Syndiniales	Dino-Group-II	Eukaryota; Alveolata; Dinophyta; Syndiniales; Dino-Group-II; Dino-Group-II-Clade-10-and-11; Dino-Group-II-Clade-10-and-11_X; Dino-Group-II-Clade-10-and-11_X_sp.;	-0.622717	-0.622717	-0.622717	2	2	17	0	0.039	-0.611557	0.005397	-0.611557	0.005397	0	-0.635925	0.003427	-0.635925	0.003427	0	0.143381	0.024896	2e-06	0.017661	2e-06	27	135
Alveolates-Syndiniales_Stramenopiles-MAST	FJ431723.1.830_U	Alveolates-Syndiniales	Dino-Group-III	Eukaryota; Alveolata; Dinophyta; Syndiniales; Dino-Group-III; Dino-Group-III_X; Dino-Group-III_XX; Dino-Group-III_XX_sp.;	KF130206.1.1737_U	Stramenopiles-MAST	MAST-3	Eukaryota; Stramenopiles; Stramenopiles_X; MAST; MAST-3; MAST-3I; MAST-3I_X; MAST-3I_X_sp.;	-0.68419	-0.68419	-0.68419	1	1	19	0	0.007	-0.650138	0.002583	-0.650138	0.002583	0	-0.671498	0.001643	-0.671498	0.001643	0	0.055193	0.015341	1e-06	0.010719	1e-06	27	137
Alveolates-Syndiniales_Stramenopiles-Chrysophytes	FJ431723.1.830_U	Alveolates-Syndiniales	Dino-Group-III	Eukaryota; Alveolata; Dinophyta; Syndiniales; Dino-Group-III; Dino-Group-III_X; Dino-Group-III_XX; Dino-Group-III_XX_sp.;	KC582997.1.1775_U	Stramenopiles-Chrysophytes	Chrysophyceae_Clade-I	Eukaryota; Stramenopiles; Ochrophyta; Chrysophyceae; Chrysophyceae_X; Chrysophyceae_Clade-I; Chrysophyceae_Clade-I_X; Chrysophyceae_Clade-I_X_sp.;	-0.636888	-0.636888	-0.636888	2	2	17	0	0.017	-0.721358	0.000491	-0.721358	0.000491	0	-0.697716	0.000896	-0.697716	0.000896	0	0.091523	0.004995	1e-06	0.007199	1e-06	27	142
Alveolates-Syndiniales_Stramenopiles-Diatoms	FJ431723.1.830_U	Alveolates-Syndiniales	Dino-Group-III	Eukaryota; Alveolata; Dinophyta; Syndiniales; Dino-Group-III; Dino-Group-III_X; Dino-Group-III_XX; Dino-Group-III_XX_sp.;	EU499988.1.803_U	Stramenopiles-Diatoms	Raphid-pennate	Eukaryota; Stramenopiles; Ochrophyta; Bacillariophyta; Bacillariophyta_X; Raphid-pennate; Raphid-pennate_X; Raphid-pennate_X_sp.;	-0.745209	-0.745209	-0.745209	2	2	17	0	0.002	-0.778584	8.6e-05	-0.778584	8.6e-05	0	-0.721369	0.000491	-0.721369	0.000491	0	0.026563	0.001555	0	0.004734	1e-06	27	145
Alveolates-Syndiniales_Cryptophytes	FJ431723.1.830_U	Alveolates-Syndiniales	Dino-Group-III	Eukaryota; Alveolata; Dinophyta; Syndiniales; Dino-Group-III; Dino-Group-III_X; Dino-Group-III_XX; Dino-Group-III_XX_sp.;	GQ863814.1.1651_U	Cryptophytes	Other-unclassified	Eukaryota; Hacrobia; Cryptophyta; Cryptophyceae; Cryptophyceae_X; Goniomonadales; Goniomonas; Goniomonas_sp.;	0.639823	0.639823	0.639823	1	1	18	0	0.025	0.676259	0.001478	0.676259	0.001478	0	0.671203	0.001654	0.671203	0.001654	0	0.113584	0.01057	1e-06	0.010759	1e-06	27	146
Alveolates-Syndiniales_Stramenopiles-MAST	FJ431723.1.830_U	Alveolates-Syndiniales	Dino-Group-III	Eukaryota; Alveolata; Dinophyta; Syndiniales; Dino-Group-III; Dino-Group-III_X; Dino-Group-III_XX; Dino-Group-III_XX_sp.;	AJ402350.1.1758_U	Stramenopiles-MAST	MAST-1	Eukaryota; Stramenopiles; Stramenopiles_X; MAST; MAST-1; MAST-1D; MAST-1D_X; MAST-1D_X_sp.;	0.767466	0.767466	0.767466	2	2	17	0	0	0.829318	1.1e-05	0.829318	1.1e-05	0	0.800702	3.8e-05	0.800702	3.8e-05	0	0	0.000387	0	0.000918	0	27	150
Alveolates-Ciliates_Stramenopiles-MAST	KJ762491.1.1777_U	Alveolates-Ciliates	Spirotrichea	Eukaryota; Alveolata; Ciliophora; Spirotrichea; Strombidiida; Strombidiidae; Strombidiidae_X; Strombidiidae_X_sp.;	JQ781989.1.1805_U	Stramenopiles-MAST	MAST-4	Eukaryota; Stramenopiles; Stramenopiles_X; MAST; MAST-4; MAST-4A; MAST-4A_X; MAST-4A_X_sp.;	-0.621986	-0.621986	-0.621986	3	1	12	2	0.035	0.04216	0.863932	0.689333	0.00447	4	-0.085844	0.726769	-0.616274	0.008428	2	0.135676	0.542428	2e-06	0.539826	3e-06	30	31
Alveolates-Ciliates_Stramenopiles-MAST	KJ762491.1.1777_U	Alveolates-Ciliates	Spirotrichea	Eukaryota; Alveolata; Ciliophora; Spirotrichea; Strombidiida; Strombidiidae; Strombidiidae_X; Strombidiidae_X_sp.;	KF129967.1.1739_U	Stramenopiles-MAST	MAST-9	Eukaryota; Stramenopiles; Stramenopiles_X; MAST; MAST-9; MAST-9A; MAST-9A_X; MAST-9A_X_sp.;	-0.626915	-0.626915	-0.626915	1	1	18	0	0.041	-0.55647	0.013344	-0.55647	0.013344	0	-0.601353	0.006459	-0.601353	0.006459	0	0.146981	0.044561	3e-06	0.027241	2e-06	30	38
Alveolates-Ciliates_Stramenopiles-Pelagophytes	KJ762491.1.1777_U	Alveolates-Ciliates	Spirotrichea	Eukaryota; Alveolata; Ciliophora; Spirotrichea; Strombidiida; Strombidiidae; Strombidiidae_X; Strombidiidae_X_sp.;	GU196150.1.1374_U	Stramenopiles-Pelagophytes	Pelagomonadaceae_clade_A	Eukaryota; Stramenopiles; Ochrophyta; Pelagophyceae; Pelagomonadales; Pelagomonadaceae; Pelagomonadaceae_clade_A; Pelagomonadaceae_clade_A_sp.;	0.639439	0.639439	0.639439	1	1	18	0	0.036	0.653576	0.002407	0.744661	0.005464	-7	0.630138	0.00383	0.766035	0.00367	-7	0.137718	0.014664	2e-06	0.019034	2e-06	30	52
Alveolates-Ciliates_Stramenopiles-Other	KJ762491.1.1777_U	Alveolates-Ciliates	Spirotrichea	Eukaryota; Alveolata; Ciliophora; Spirotrichea; Strombidiida; Strombidiidae; Strombidiidae_X; Strombidiidae_X_sp.;	EF695122.1.814_U	Stramenopiles-Other	MOCH-2	Eukaryota; Stramenopiles; Stramenopiles_X; MOCH; MOCH-2; MOCH-2_X; MOCH-2_XX; MOCH-2_XX_sp.;	-0.697482	-0.697482	-0.697482	1	1	18	0	0.004	-0.636462	0.003391	-0.660183	0.014059	-6	-0.679298	0.00138	-0.751511	0.003057	-6	0.040295	0.018334	3e-06	0.009548	2e-06	30	60
Alveolates-Ciliates_Alveolates-Dinoflagellates	KJ762491.1.1777_U	Alveolates-Ciliates	Spirotrichea	Eukaryota; Alveolata; Ciliophora; Spirotrichea; Strombidiida; Strombidiidae; Strombidiidae_X; Strombidiidae_X_sp.;	HE611580.1.1746_U	Alveolates-Dinoflagellates	Gyrodinium	Eukaryota; Alveolata; Dinophyta; Dinophyceae; Dinophyceae_X; Dinophyceae_XX; Gyrodinium; Gyrodinium_sp.;	0.700581	0.700581	0.700581	1	1	18	0	0.004	0.600427	0.006564	0.618017	0.024377	-6	0.659923	0.002108	0.659923	0.002108	0	0.040295	0.02814	4e-06	0.012711	1e-06	30	65
Alveolates-Ciliates_Alveolates-Dinoflagellates	KJ762491.1.1777_U	Alveolates-Ciliates	Spirotrichea	Eukaryota; Alveolata; Ciliophora; Spirotrichea; Strombidiida; Strombidiidae; Strombidiidae_X; Strombidiidae_X_sp.;	EU793087.1.924_U	Alveolates-Dinoflagellates	Dinophyceae	Eukaryota; Alveolata; Dinophyta; Dinophyceae; Dinophyceae_X; Dinophyceae_XX; Dinophyceae_XXX; Dinophyceae_XXX_sp.;	0.792084	0.792084	0.792084	1	1	18	0	0	0.752356	0.000202	0.752356	0.000202	0	0.728457	0.000405	0.728457	0.000405	0	0	0.002774	0	0.004147	0	30	97
Alveolates-Ciliates_Alveolates-Syndiniales	KJ762491.1.1777_U	Alveolates-Ciliates	Spirotrichea	Eukaryota; Alveolata; Ciliophora; Spirotrichea; Strombidiida; Strombidiidae; Strombidiidae_X; Strombidiidae_X_sp.;	EF172977.1.1676_U	Alveolates-Syndiniales	Dino-Group-II	Eukaryota; Alveolata; Dinophyta; Syndiniales; Dino-Group-II; Dino-Group-II-Clade-7; Dino-Group-II-Clade-7_X; Dino-Group-II-Clade-7_X_sp.;	-0.656892	-0.656892	-0.656892	1	2	15	-1	0.02	-0.130622	0.594029	-0.628916	0.005174	-1	-0.177578	0.467039	-0.63338	0.004774	-1	0.100183	0.452808	2e-06	0.431443	2e-06	30	100
Alveolates-Ciliates_Alveolates-Ciliates	KJ762491.1.1777_U	Alveolates-Ciliates	Spirotrichea	Eukaryota; Alveolata; Ciliophora; Spirotrichea; Strombidiida; Strombidiidae; Strombidiidae_X; Strombidiidae_X_sp.;	HQ867071.1.870_U	Alveolates-Ciliates	Spirotrichea	Eukaryota; Alveolata; Ciliophora; Spirotrichea; Strombidiida_G; Strombidiida_G_X; Strombidiida_G_XX; Strombidiida_G_XX_sp.;	0.683397	0.683397	0.683397	1	1	18	0	0.007	0.703097	0.000785	0.703097	0.000785	0	0.69435	0.000972	0.69435	0.000972	0	0.055193	0.006832	1e-06	0.007528	1e-06	30	106
Alveolates-Ciliates_Alveolates-Dinoflagellates	KJ762491.1.1777_U	Alveolates-Ciliates	Spirotrichea	Eukaryota; Alveolata; Ciliophora; Spirotrichea; Strombidiida; Strombidiidae; Strombidiidae_X; Strombidiidae_X_sp.;	AY664921.1.1754_U	Alveolates-Dinoflagellates	Prorocentrum	Eukaryota; Alveolata; Dinophyta; Dinophyceae; Dinophyceae_X; Dinophyceae_XX; Prorocentrum; Prorocentrum_sp.;	0.622498	0.622498	0.622498	2	2	17	0	0.035	0.379642	0.108898	-0.545045	0.066858	7	0.611636	0.005389	0.611636	0.005389	0	0.135676	0.170865	7e-06	0.024078	2e-06	30	111
Alveolates-Ciliates_Alveolates-Ciliates	KJ762491.1.1777_U	Alveolates-Ciliates	Spirotrichea	Eukaryota; Alveolata; Ciliophora; Spirotrichea; Strombidiida; Strombidiidae; Strombidiidae_X; Strombidiidae_X_sp.;	DQ120009.1.1729_U	Alveolates-Ciliates	Litostomatea	Eukaryota; Alveolata; Ciliophora; Litostomatea; Cyclotrichia; Cyclotrichia_X; Cyclotrichia_XX; Cyclotrichia_XX_sp.;	-0.663962	-0.663962	-0.663962	1	1	18	0	0.014	-0.619424	0.004679	-0.619424	0.004679	0	-0.672147	0.00162	-0.672147	0.00162	0	0.081741	0.022698	2e-06	0.010626	1e-06	30	113
Alveolates-Ciliates_Rhizaria-Acantharia	KJ762491.1.1777_U	Alveolates-Ciliates	Spirotrichea	Eukaryota; Alveolata; Ciliophora; Spirotrichea; Strombidiida; Strombidiidae; Strombidiidae_X; Strombidiidae_X_sp.;	JN811185.1.1695_U	Rhizaria-Acantharia	Lychnaspis	Eukaryota; Rhizaria; Radiolaria; Acantharea; Arthracanthida-Symphyacanthida; Arthracanthida-Symphyacanthida_X; Lychnaspis; Lychnaspis_giltschi;	0.626598	0.626598	0.626598	1	6	14	-5	0.035	-0.245992	0.310024	0.731793	0.002929	-5	-0.243117	0.315894	0.768823	0.001311	-5	0.135676	0.318884	2e-06	0.348168	1e-06	30	114
Alveolates-Ciliates_Alveolates-Dinoflagellates	KJ762491.1.1777_U	Alveolates-Ciliates	Spirotrichea	Eukaryota; Alveolata; Ciliophora; Spirotrichea; Strombidiida; Strombidiidae; Strombidiidae_X; Strombidiidae_X_sp.;	FN690221.1.1692_U	Alveolates-Dinoflagellates	Dinophyceae	Eukaryota; Alveolata; Dinophyta; Dinophyceae; Dinophyceae_X; Dinophyceae_XX; Dinophyceae_XXX; Dinophyceae_XXX_sp.;	0.652245	0.652245	0.652245	1	1	19	0	0.02	0.612915	0.005267	0.612915	0.005267	0	0.646226	0.002796	0.646226	0.002796	0	0.100183	0.02447	2e-06	0.015412	1e-06	30	118
Alveolates-Ciliates_Haptophytes	KJ762491.1.1777_U	Alveolates-Ciliates	Spirotrichea	Eukaryota; Alveolata; Ciliophora; Spirotrichea; Strombidiida; Strombidiidae; Strombidiidae_X; Strombidiidae_X_sp.;	HG970975	Haptophytes	Haptophyta	Eukaryota; Hacrobia; Haptophyta; Haptophyta_X; Haptophyta_XX; Haptophyta_XXX; Haptophyta_XXXX; Haptophyta_XXXX_sp.;	0.661176	0.661176	0.661176	1	1	18	0	0.012	0.593093	0.007439	0.631515	0.027624	-7	0.626838	0.004077	0.626838	0.004077	0	0.074959	0.030696	4e-06	0.019799	2e-06	30	126
Alveolates-Ciliates_Alveolates-Ciliates	KJ762491.1.1777_U	Alveolates-Ciliates	Spirotrichea	Eukaryota; Alveolata; Ciliophora; Spirotrichea; Strombidiida; Strombidiidae; Strombidiidae_X; Strombidiidae_X_sp.;	FJ422993.1.1778_U	Alveolates-Ciliates	Spirotrichea	Eukaryota; Alveolata; Ciliophora; Spirotrichea; Strombidiida; Tontoniidae_B; Pseudotontonia; Pseudotontonia_simplicidens;	0.740994	0.740994	0.740994	3	3	14	0	0.001	0.624972	0.004222	0.624972	0.004222	0	0.645333	0.002846	0.645333	0.002846	0	0.017494	0.021293	2e-06	0.015571	1e-06	30	129
Alveolates-Ciliates_Alveolates-Syndiniales	KJ762491.1.1777_U	Alveolates-Ciliates	Spirotrichea	Eukaryota; Alveolata; Ciliophora; Spirotrichea; Strombidiida; Strombidiidae; Strombidiidae_X; Strombidiidae_X_sp.;	HQ870498.1.849_U	Alveolates-Syndiniales	Dino-Group-III	Eukaryota; Alveolata; Dinophyta; Syndiniales; Dino-Group-III; Dino-Group-III_X; Dino-Group-III_XX; Dino-Group-III_XX_sp.;	0.647873	0.647873	0.647873	1	1	19	0	0.018	0.66109	0.002057	0.66109	0.002057	0	0.620502	0.004588	0.620502	0.004588	0	0.094526	0.013287	1e-06	0.021427	2e-06	30	132
Alveolates-Ciliates_Alveolates-Syndiniales	KJ762491.1.1777_U	Alveolates-Ciliates	Spirotrichea	Eukaryota; Alveolata; Ciliophora; Spirotrichea; Strombidiida; Strombidiidae; Strombidiidae_X; Strombidiidae_X_sp.;	GU824677.1.1204_U	Alveolates-Syndiniales	Dino-Group-II	Eukaryota; Alveolata; Dinophyta; Syndiniales; Dino-Group-II; Dino-Group-II-Clade-10-and-11; Dino-Group-II-Clade-10-and-11_X; Dino-Group-II-Clade-10-and-11_X_sp.;	-0.666943	-0.666943	-0.666943	1	1	18	0	0.015	-0.569524	0.010917	-0.626036	0.029426	-7	-0.654398	0.002366	-0.654398	0.002366	0	0.085181	0.03931	5e-06	0.013858	1e-06	30	135
Alveolates-Ciliates_Stramenopiles-MAST	KJ762491.1.1777_U	Alveolates-Ciliates	Spirotrichea	Eukaryota; Alveolata; Ciliophora; Spirotrichea; Strombidiida; Strombidiidae; Strombidiidae_X; Strombidiidae_X_sp.;	AJ402350.1.1758_U	Stramenopiles-MAST	MAST-1	Eukaryota; Stramenopiles; Stramenopiles_X; MAST; MAST-1; MAST-1D; MAST-1D_X; MAST-1D_X_sp.;	0.685224	0.685224	0.685224	1	1	18	0	0.008	0.643858	0.002931	0.643858	0.002931	0	0.694797	0.000962	0.694797	0.000962	0	0.059414	0.016705	2e-06	0.007493	1e-06	30	150
Stramenopiles-MAST_Alveolates-Syndiniales	JQ781989.1.1805_U	Stramenopiles-MAST	MAST-4	Eukaryota; Stramenopiles; Stramenopiles_X; MAST; MAST-4; MAST-4A; MAST-4A_X; MAST-4A_X_sp.;	KF130214.1.1759_U	Alveolates-Syndiniales	Dino-Group-II	Eukaryota; Alveolata; Dinophyta; Syndiniales; Dino-Group-II; Dino-Group-II-Clade-10-and-11; Dino-Group-II-Clade-10-and-11_X; Dino-Group-II-Clade-10-and-11_X_sp.;	0.642996	0.642996	0.642996	1	1	15	0	0.039	0.710864	0.000646	0.710864	0.000646	0	0.662562	0.001994	0.662562	0.001994	0	0.143381	0.006019	1e-06	0.012288	1e-06	31	33
Stramenopiles-MAST_Alveolates-Syndiniales	JQ781989.1.1805_U	Stramenopiles-MAST	MAST-4	Eukaryota; Stramenopiles; Stramenopiles_X; MAST; MAST-4; MAST-4A; MAST-4A_X; MAST-4A_X_sp.;	AACY020102112.1.1515_U	Alveolates-Syndiniales	Dino-Group-II	Eukaryota; Alveolata; Dinophyta; Syndiniales; Dino-Group-II; Dino-Group-II-Clade-16; Dino-Group-II-Clade-16_X; Dino-Group-II-Clade-16_X_sp.;	-0.802923	-0.802923	-0.802923	1	2	17	-1	0.001	-0.027038	0.91251	-0.528856	0.024034	-1	0.336408	0.159055	-0.827996	2.2e-05	-1	0.017494	0.55506	4e-06	0.230619	0	31	44
Stramenopiles-MAST_Stramenopiles-MAST	JQ781989.1.1805_U	Stramenopiles-MAST	MAST-4	Eukaryota; Stramenopiles; Stramenopiles_X; MAST; MAST-4; MAST-4A; MAST-4A_X; MAST-4A_X_sp.;	KF129607.1.1760_U	Stramenopiles-MAST	MAST-7	Eukaryota; Stramenopiles; Stramenopiles_X; MAST; MAST-7; MAST-7D; MAST-7D_X; MAST-7D_X_sp.;	0.914859	0.914859	0.914859	1	1	19	0	0	0.901735	0	0.901735	0	0	0.938023	0	0.938023	0	0	0	2.7e-05	0	4e-06	0	31	90
Stramenopiles-MAST_Stramenopiles-MAST	JQ781989.1.1805_U	Stramenopiles-MAST	MAST-4	Eukaryota; Stramenopiles; Stramenopiles_X; MAST; MAST-4; MAST-4A; MAST-4A_X; MAST-4A_X_sp.;	JQ781961.1.1805_U	Stramenopiles-MAST	MAST-4	Eukaryota; Stramenopiles; Stramenopiles_X; MAST; MAST-4; MAST-4A; MAST-4A_X; MAST-4A_X_sp.;	0.657654	0.657654	0.657654	1	1	19	0	0.023	0.625324	0.004194	0.625324	0.004194	0	0.661378	0.002044	0.661378	0.002044	0	0.108834	0.021207	2e-06	0.012443	1e-06	31	99
Stramenopiles-MAST_Stramenopiles-Diatoms	JQ781989.1.1805_U	Stramenopiles-MAST	MAST-4	Eukaryota; Stramenopiles; Stramenopiles_X; MAST; MAST-4; MAST-4A; MAST-4A_X; MAST-4A_X_sp.;	AY256270.1.1308_U	Stramenopiles-Diatoms	Araphid-pennate	Eukaryota; Stramenopiles; Ochrophyta; Bacillariophyta; Bacillariophyta_X; Araphid-pennate; Araphid-pennate_X; Araphid-pennate_X_sp.;	0.791228	0.791228	0.791228	1	1	19	0	0	0.835723	8e-06	0.835723	8e-06	0	0.771391	0.00011	0.771391	0.00011	0	0	0.00033	0	0.001793	0	31	112
Stramenopiles-MAST_Alveolates-Dinoflagellates	JQ781989.1.1805_U	Stramenopiles-MAST	MAST-4	Eukaryota; Stramenopiles; Stramenopiles_X; MAST; MAST-4; MAST-4A; MAST-4A_X; MAST-4A_X_sp.;	KJ759269.1.1802_U	Alveolates-Dinoflagellates	Dinophyceae	Eukaryota; Alveolata; Dinophyta; Dinophyceae; Dinophyceae_X; Dinophyceae_XX; Dinophyceae_XXX; Dinophyceae_XXX_sp.;	0.706499	0.706499	0.706499	1	1	19	0	0.007	0.694975	0.000958	0.694975	0.000958	0	0.682916	0.001271	0.682916	0.001271	0	0.055193	0.00779	1e-06	0.009076	1e-06	31	116
Stramenopiles-MAST_Alveolates-Ciliates	JQ781989.1.1805_U	Stramenopiles-MAST	MAST-4	Eukaryota; Stramenopiles; Stramenopiles_X; MAST; MAST-4; MAST-4A; MAST-4A_X; MAST-4A_X_sp.;	FJ422993.1.1778_U	Alveolates-Ciliates	Spirotrichea	Eukaryota; Alveolata; Ciliophora; Spirotrichea; Strombidiida; Tontoniidae_B; Pseudotontonia; Pseudotontonia_simplicidens;	-0.701476	-0.701476	-0.701476	1	3	12	-2	0.011	0.389367	0.0994	-0.570276	0.016835	-2	0.298377	0.214679	-0.675659	0.002912	-2	0.071521	0.161159	3e-06	0.276906	2e-06	31	129
Stramenopiles-MAST_Alveolates-Dinoflagellates	JQ781989.1.1805_U	Stramenopiles-MAST	MAST-4	Eukaryota; Stramenopiles; Stramenopiles_X; MAST; MAST-4; MAST-4A; MAST-4A_X; MAST-4A_X_sp.;	KJ759351.1.1800_U	Alveolates-Dinoflagellates	Dinophyceae	Eukaryota; Alveolata; Dinophyta; Dinophyceae; Dinophyceae_X; Dinophyceae_XX; Dinophyceae_XXX; Dinophyceae_XXX_sp.;	0.642783	0.642783	0.642783	1	1	16	0	0.038	0.606664	0.005887	0.606664	0.005887	0	0.501978	0.028524	0.501978	0.028524	0	0.141376	0.026238	2e-06	0.076089	5e-06	31	136
Stramenopiles-MAST_Stramenopiles-Other	JQ781989.1.1805_U	Stramenopiles-MAST	MAST-4	Eukaryota; Stramenopiles; Stramenopiles_X; MAST; MAST-4; MAST-4A; MAST-4A_X; MAST-4A_X_sp.;	EU500084.1.817_U	Stramenopiles-Other	MOCH-2	Eukaryota; Stramenopiles; Stramenopiles_X; MOCH; MOCH-2; MOCH-2_X; MOCH-2_XX; MOCH-2_XX_sp.;	0.686085	0.686085	0.686085	1	1	19	0	0.009	0.56278	0.012122	0.56278	0.012122	0	0.690654	0.001061	0.690654	0.001061	0	0.063892	0.041847	3e-06	0.008015	1e-06	31	144
Alveolates-Dinoflagellates_Alveolates-Ciliates	GU825315.1.1202_U	Alveolates-Dinoflagellates	Dinophyceae	Eukaryota; Alveolata; Dinophyta; Dinophyceae; Dinophyceae_X; Dinophyceae_XX; Dinophyceae_XXX; Dinophyceae_XXX_sp.;	KY290313.1.1621_U	Alveolates-Ciliates	Spirotrichea	Eukaryota; Alveolata; Ciliophora; Spirotrichea; Choreotrichida; Leegaardiellidae_B; Leegaardiella; Leegaardiella_sp.;	-0.789249	-0.789249	-0.789249	1	1	19	0	0.001	-0.693673	0.000988	-0.693673	0.000988	0	-0.817743	1.9e-05	-0.817743	1.9e-05	0	0.017494	0.007968	1e-06	0.00059	0	32	36
Alveolates-Dinoflagellates_Stramenopiles-MAST	GU825315.1.1202_U	Alveolates-Dinoflagellates	Dinophyceae	Eukaryota; Alveolata; Dinophyta; Dinophyceae; Dinophyceae_X; Dinophyceae_XX; Dinophyceae_XXX; Dinophyceae_XXX_sp.;	JQ782004.1.1784_U	Stramenopiles-MAST	MAST-1	Eukaryota; Stramenopiles; Stramenopiles_X; MAST; MAST-1; MAST-1C; MAST-1C_X; MAST-1C_X_sp.;	0.722229	0.722229	0.722229	3	3	16	0	0.005	0.703286	0.000782	0.703286	0.000782	0	0.677788	0.001428	0.677788	0.001428	0	0.0456	0.006813	1e-06	0.009758	1e-06	32	37
Alveolates-Dinoflagellates_Stramenopiles-MAST	GU825315.1.1202_U	Alveolates-Dinoflagellates	Dinophyceae	Eukaryota; Alveolata; Dinophyta; Dinophyceae; Dinophyceae_X; Dinophyceae_XX; Dinophyceae_XXX; Dinophyceae_XXX_sp.;	KF129967.1.1739_U	Stramenopiles-MAST	MAST-9	Eukaryota; Stramenopiles; Stramenopiles_X; MAST; MAST-9; MAST-9A; MAST-9A_X; MAST-9A_X_sp.;	-0.781518	-0.781518	-0.781518	3	3	16	0	0	-0.837247	8e-06	-0.837247	8e-06	0	-0.817025	2e-05	-0.817025	2e-05	0	0	0.000317	0	0.00059	0	32	38
Alveolates-Dinoflagellates_Stramenopiles-MAST	GU825315.1.1202_U	Alveolates-Dinoflagellates	Dinophyceae	Eukaryota; Alveolata; Dinophyta; Dinophyceae; Dinophyceae_X; Dinophyceae_XX; Dinophyceae_XXX; Dinophyceae_XXX_sp.;	HM163291.1.1682_U	Stramenopiles-MAST	MAST-3	Eukaryota; Stramenopiles; Stramenopiles_X; MAST; MAST-3; MAST-3I; MAST-3I_X; MAST-3I_X_sp.;	-0.676921	-0.676921	-0.676921	1	1	17	0	0.014	-0.713793	0.000599	-0.713793	0.000599	0	-0.675439	0.001506	-0.675439	0.001506	0	0.081741	0.005687	1e-06	0.010095	1e-06	32	39
Alveolates-Dinoflagellates_Alveolates-Dinoflagellates	GU825315.1.1202_U	Alveolates-Dinoflagellates	Dinophyceae	Eukaryota; Alveolata; Dinophyta; Dinophyceae; Dinophyceae_X; Dinophyceae_XX; Dinophyceae_XXX; Dinophyceae_XXX_sp.;	KF129831.1.1758_U	Alveolates-Dinoflagellates	Dinophyceae	Eukaryota; Alveolata; Dinophyta; Dinophyceae; Dinophyceae_X; Dinophyceae_XX; Dinophyceae_XXX; Dinophyceae_XXX_sp.;	0.886735	0.886735	0.886735	1	1	19	0	0	0.880216	1e-06	0.880216	1e-06	0	0.901971	0	0.901971	0	0	0	7.1e-05	0	3.2e-05	0	32	40
Alveolates-Dinoflagellates_Alveolates-Dinoflagellates	GU825315.1.1202_U	Alveolates-Dinoflagellates	Dinophyceae	Eukaryota; Alveolata; Dinophyta; Dinophyceae; Dinophyceae_X; Dinophyceae_XX; Dinophyceae_XXX; Dinophyceae_XXX_sp.;	FJ217814.1.1521_U	Alveolates-Dinoflagellates	Azadinium	Eukaryota; Alveolata; Dinophyta; Dinophyceae; Dinophyceae_X; Dinophyceae_XX; Azadinium; Azadinium_spinosum;	0.903905	0.903905	0.903905	1	1	18	0	0	0.914003	0	0.914003	0	0	0.885476	0	0.885476	0	0	0	1.5e-05	0	7.2e-05	0	32	43
Alveolates-Dinoflagellates_Alveolates-Ciliates	GU825315.1.1202_U	Alveolates-Dinoflagellates	Dinophyceae	Eukaryota; Alveolata; Dinophyta; Dinophyceae; Dinophyceae_X; Dinophyceae_XX; Dinophyceae_XXX; Dinophyceae_XXX_sp.;	KF130183.1.1714_U	Alveolates-Ciliates	Colpodea	Eukaryota; Alveolata; Ciliophora; Colpodea; Colpodea-1; Colpodea-1_X; Colpodea-1_XX; Colpodea-1_XX_sp.;	-0.616997	-0.616997	-0.616997	6	1	13	5	0.049	0.178631	0.464359	-0.818023	0.00035	5	0.095951	0.695981	-0.809266	0.000455	5	0.160556	0.39907	0	0.528529	1e-06	32	48
Alveolates-Dinoflagellates_Alveolates-Dinoflagellates	GU825315.1.1202_U	Alveolates-Dinoflagellates	Dinophyceae	Eukaryota; Alveolata; Dinophyta; Dinophyceae; Dinophyceae_X; Dinophyceae_XX; Dinophyceae_XXX; Dinophyceae_XXX_sp.;	HM581705.1.1793_U	Alveolates-Dinoflagellates	Dinophyceae	Eukaryota; Alveolata; Dinophyta; Dinophyceae; Dinophyceae_X; Dinophyceae_XX; Dinophyceae_XXX; Dinophyceae_XXX_sp.;	0.752991	0.752991	0.752991	1	1	19	0	0.003	0.731935	0.000368	0.731935	0.000368	0	0.800351	3.9e-05	0.800351	3.9e-05	0	0.033974	0.004207	0	0.000922	0	32	55
Alveolates-Dinoflagellates_Stramenopiles-Other	GU825315.1.1202_U	Alveolates-Dinoflagellates	Dinophyceae	Eukaryota; Alveolata; Dinophyta; Dinophyceae; Dinophyceae_X; Dinophyceae_XX; Dinophyceae_XXX; Dinophyceae_XXX_sp.;	EF695122.1.814_U	Stramenopiles-Other	MOCH-2	Eukaryota; Stramenopiles; Stramenopiles_X; MOCH; MOCH-2; MOCH-2_X; MOCH-2_XX; MOCH-2_XX_sp.;	-0.623899	-0.623899	-0.623899	3	3	16	0	0.049	-0.656173	0.002281	-0.656173	0.002281	0	-0.605183	0.006042	-0.605183	0.006042	0	0.160556	0.014221	1e-06	0.02598	2e-06	32	60
Alveolates-Dinoflagellates_Stramenopiles-MAST	GU825315.1.1202_U	Alveolates-Dinoflagellates	Dinophyceae	Eukaryota; Alveolata; Dinophyta; Dinophyceae; Dinophyceae_X; Dinophyceae_XX; Dinophyceae_XXX; Dinophyceae_XXX_sp.;	GU823216.1.1365_U	Stramenopiles-MAST	MAST-3	Eukaryota; Stramenopiles; Stramenopiles_X; MAST; MAST-3; MAST-3I; MAST-3I_X; MAST-3I_X_sp.;	-0.791353	-0.791353	-0.791353	1	1	18	0	0	-0.853855	3e-06	-0.853855	3e-06	0	-0.792982	5.1e-05	-0.792982	5.1e-05	0	0	0.000176	0	0.001082	0	32	61
Alveolates-Dinoflagellates_Alveolates-Dinoflagellates	GU825315.1.1202_U	Alveolates-Dinoflagellates	Dinophyceae	Eukaryota; Alveolata; Dinophyta; Dinophyceae; Dinophyceae_X; Dinophyceae_XX; Dinophyceae_XXX; Dinophyceae_XXX_sp.;	HE611580.1.1746_U	Alveolates-Dinoflagellates	Gyrodinium	Eukaryota; Alveolata; Dinophyta; Dinophyceae; Dinophyceae_X; Dinophyceae_XX; Gyrodinium; Gyrodinium_sp.;	0.923636	0.923636	0.923636	2	2	17	0	0	0.952797	0	0.952797	0	0	0.922334	0	0.922334	0	0	0	1e-06	0	9e-06	0	32	65
Alveolates-Dinoflagellates_Alveolates-Dinoflagellates	GU825315.1.1202_U	Alveolates-Dinoflagellates	Dinophyceae	Eukaryota; Alveolata; Dinophyta; Dinophyceae; Dinophyceae_X; Dinophyceae_XX; Dinophyceae_XXX; Dinophyceae_XXX_sp.;	HM581766.1.1782_U	Alveolates-Dinoflagellates	Prorocentrum	Eukaryota; Alveolata; Dinophyta; Dinophyceae; Dinophyceae_X; Dinophyceae_XX; Prorocentrum; Prorocentrum_sp.;	0.891148	0.891148	0.891148	3	3	16	0	0	0.826863	1.3e-05	0.826863	1.3e-05	0	0.852632	4e-06	0.852632	4e-06	0	0	0.000418	0	0.000205	0	32	66
Alveolates-Dinoflagellates_Alveolates-Ciliates	GU825315.1.1202_U	Alveolates-Dinoflagellates	Dinophyceae	Eukaryota; Alveolata; Dinophyta; Dinophyceae; Dinophyceae_X; Dinophyceae_XX; Dinophyceae_XXX; Dinophyceae_XXX_sp.;	JX188331.1.1726_U	Alveolates-Ciliates	Oligohymenophorea	Eukaryota; Alveolata; Ciliophora; Oligohymenophorea; Scuticociliatia; Scuticociliatia-1; Scuticociliatia-1_X; Scuticociliatia-1_X_sp.;	-0.681492	-0.681492	-0.681492	1	1	18	0	0.011	-0.779617	8.3e-05	-0.779617	8.3e-05	0	-0.717544	0.000543	-0.717544	0.000543	0	0.071521	0.001518	0	0.005039	1e-06	32	69
Alveolates-Dinoflagellates_Alveolates-Ciliates	GU825315.1.1202_U	Alveolates-Dinoflagellates	Dinophyceae	Eukaryota; Alveolata; Dinophyta; Dinophyceae; Dinophyceae_X; Dinophyceae_XX; Dinophyceae_XXX; Dinophyceae_XXX_sp.;	KF129779.1.1734_U	Alveolates-Ciliates	Spirotrichea	Eukaryota; Alveolata; Ciliophora; Spirotrichea; Strombidiida; Tontoniidae_A; Spirotontonia; Spirotontonia_sp.;	0.668988	0.668988	0.668988	4	1	15	3	0.021	-0.207552	0.393871	0.715901	0.001815	3	-0.192982	0.428613	0.714706	0.001863	3	0.10319	0.364669	1e-06	0.412027	1e-06	32	72
Alveolates-Dinoflagellates_Alveolates-Ciliates	GU825315.1.1202_U	Alveolates-Dinoflagellates	Dinophyceae	Eukaryota; Alveolata; Dinophyta; Dinophyceae; Dinophyceae_X; Dinophyceae_XX; Dinophyceae_XXX; Dinophyceae_XXX_sp.;	AY665059.1.1720_U	Alveolates-Ciliates	Oligohymenophorea	Eukaryota; Alveolata; Ciliophora; Oligohymenophorea; Scuticociliatia; Scuticociliatia-1; Scuticociliatia-1_X; Scuticociliatia-1_X_sp.;	-0.697355	-0.697355	-0.697355	3	3	16	0	0.008	-0.746681	0.00024	-0.746681	0.00024	0	-0.752084	0.000204	-0.752084	0.000204	0	0.059414	0.003112	0	0.002663	0	32	77
Alveolates-Dinoflagellates_Rhizaria-Acantharia	GU825315.1.1202_U	Alveolates-Dinoflagellates	Dinophyceae	Eukaryota; Alveolata; Dinophyta; Dinophyceae; Dinophyceae_X; Dinophyceae_XX; Dinophyceae_XXX; Dinophyceae_XXX_sp.;	HM561210.1.973_U	Rhizaria-Acantharia	Acantharea	Eukaryota; Rhizaria; Radiolaria; Acantharea; Acantharea_X; Acantharea_XX; Acantharea_XXX; Acantharea_XXX_sp.;	-0.838107	-0.838107	-0.838107	3	3	16	0	0	-0.872251	1e-06	-0.872251	1e-06	0	-0.833699	9e-06	-0.833699	9e-06	0	0	9.1e-05	0	0.00038	0	32	80
Alveolates-Dinoflagellates_Archaeplastids-Chlorophytes	GU825315.1.1202_U	Alveolates-Dinoflagellates	Dinophyceae	Eukaryota; Alveolata; Dinophyta; Dinophyceae; Dinophyceae_X; Dinophyceae_XX; Dinophyceae_XXX; Dinophyceae_XXX_sp.;	EU143529.1.906_U	Archaeplastids-Chlorophytes	Pyramimonadales	Eukaryota; Archaeplastida; Chlorophyta; Pyramimonadales; Pyramimonadales_X; Pyramimonadales_XX; Pterosperma; Pterosperma_sp.;	0.836594	0.836594	0.836594	3	3	16	0	0	0.791639	5.4e-05	0.791639	5.4e-05	0	0.803337	3.4e-05	0.803337	3.4e-05	0	0	0.001136	0	0.000857	0	32	84
Alveolates-Dinoflagellates_Alveolates-Ciliates	GU825315.1.1202_U	Alveolates-Dinoflagellates	Dinophyceae	Eukaryota; Alveolata; Dinophyta; Dinophyceae; Dinophyceae_X; Dinophyceae_XX; Dinophyceae_XXX; Dinophyceae_XXX_sp.;	HQ866199.1.872_U	Alveolates-Ciliates	Spirotrichea	Eukaryota; Alveolata; Ciliophora; Spirotrichea; Strombidiida_F; Strombidiida_F_X; Strombidiida_F_XX; Strombidiida_F_XX_sp.;	0.698021	0.698021	0.698021	1	1	19	0	0.008	0.652464	0.002463	0.652464	0.002463	0	0.710838	0.000646	0.710838	0.000646	0	0.059414	0.014878	1e-06	0.005688	1e-06	32	88
Alveolates-Dinoflagellates_Alveolates-Ciliates	GU825315.1.1202_U	Alveolates-Dinoflagellates	Dinophyceae	Eukaryota; Alveolata; Dinophyta; Dinophyceae; Dinophyceae_X; Dinophyceae_XX; Dinophyceae_XXX; Dinophyceae_XXX_sp.;	KJ759492.1.1752_U	Alveolates-Ciliates	Phyllopharyngea	Eukaryota; Alveolata; Ciliophora; Phyllopharyngea; Cyrtophoria; Chlamydodontidae; Chlamydodon; Chlamydodon_sp.;	-0.768714	-0.768714	-0.768714	5	5	14	0	0.001	-0.62834	0.003963	-0.62834	0.003963	0	-0.585965	0.008379	0.661538	0.009975	5	0.017494	0.0204	2e-06	0.032659	3e-06	32	93
Alveolates-Dinoflagellates_Alveolates-Dinoflagellates	GU825315.1.1202_U	Alveolates-Dinoflagellates	Dinophyceae	Eukaryota; Alveolata; Dinophyta; Dinophyceae; Dinophyceae_X; Dinophyceae_XX; Dinophyceae_XXX; Dinophyceae_XXX_sp.;	EU793087.1.924_U	Alveolates-Dinoflagellates	Dinophyceae	Eukaryota; Alveolata; Dinophyta; Dinophyceae; Dinophyceae_X; Dinophyceae_XX; Dinophyceae_XXX; Dinophyceae_XXX_sp.;	0.803871	0.803871	0.803871	2	2	17	0	0	0.827738	1.2e-05	0.827738	1.2e-05	0	0.833333	9e-06	0.833333	9e-06	0	0	0.000407	0	0.000383	0	32	97
Alveolates-Dinoflagellates_Alveolates-Ciliates	GU825315.1.1202_U	Alveolates-Dinoflagellates	Dinophyceae	Eukaryota; Alveolata; Dinophyta; Dinophyceae; Dinophyceae_X; Dinophyceae_XX; Dinophyceae_XXX; Dinophyceae_XXX_sp.;	HQ867071.1.870_U	Alveolates-Ciliates	Spirotrichea	Eukaryota; Alveolata; Ciliophora; Spirotrichea; Strombidiida_G; Strombidiida_G_X; Strombidiida_G_XX; Strombidiida_G_XX_sp.;	0.648012	0.648012	0.648012	3	3	16	0	0.037	0.74274	0.00027	0.74274	0.00027	0	0.616937	0.004897	0.67033	0.012166	6	0.139515	0.003398	0	0.022352	3e-06	32	106
Alveolates-Dinoflagellates_Alveolates-Dinoflagellates	GU825315.1.1202_U	Alveolates-Dinoflagellates	Dinophyceae	Eukaryota; Alveolata; Dinophyta; Dinophyceae; Dinophyceae_X; Dinophyceae_XX; Dinophyceae_XXX; Dinophyceae_XXX_sp.;	AY664921.1.1754_U	Alveolates-Dinoflagellates	Prorocentrum	Eukaryota; Alveolata; Dinophyta; Dinophyceae; Dinophyceae_X; Dinophyceae_XX; Prorocentrum; Prorocentrum_sp.;	0.824676	0.824676	0.824676	3	3	16	0	0	0.747452	0.000235	0.747452	0.000235	0	0.833699	9e-06	0.833699	9e-06	0	0	0.003069	0	0.00038	0	32	111
Alveolates-Dinoflagellates_Alveolates-Ciliates	GU825315.1.1202_U	Alveolates-Dinoflagellates	Dinophyceae	Eukaryota; Alveolata; Dinophyta; Dinophyceae; Dinophyceae_X; Dinophyceae_XX; Dinophyceae_XXX; Dinophyceae_XXX_sp.;	DQ120009.1.1729_U	Alveolates-Ciliates	Litostomatea	Eukaryota; Alveolata; Ciliophora; Litostomatea; Cyclotrichia; Cyclotrichia_X; Cyclotrichia_XX; Cyclotrichia_XX_sp.;	-0.846745	-0.846745	-0.846745	3	3	16	0	0	-0.866262	2e-06	-0.866262	2e-06	0	-0.847368	5e-06	-0.847368	5e-06	0	0	0.000113	0	0.000239	0	32	113
Alveolates-Dinoflagellates_Alveolates-Dinoflagellates	GU825315.1.1202_U	Alveolates-Dinoflagellates	Dinophyceae	Eukaryota; Alveolata; Dinophyta; Dinophyceae; Dinophyceae_X; Dinophyceae_XX; Dinophyceae_XXX; Dinophyceae_XXX_sp.;	KJ759269.1.1802_U	Alveolates-Dinoflagellates	Dinophyceae	Eukaryota; Alveolata; Dinophyta; Dinophyceae; Dinophyceae_X; Dinophyceae_XX; Dinophyceae_XXX; Dinophyceae_XXX_sp.;	0.631878	0.631878	0.631878	1	1	18	0	0.049	0.640519	0.003132	0.640519	0.003132	0	0.648815	0.002653	0.648815	0.002653	0	0.160556	0.017415	2e-06	0.014904	1e-06	32	116
Alveolates-Dinoflagellates_Alveolates-Dinoflagellates	GU825315.1.1202_U	Alveolates-Dinoflagellates	Dinophyceae	Eukaryota; Alveolata; Dinophyta; Dinophyceae; Dinophyceae_X; Dinophyceae_XX; Dinophyceae_XXX; Dinophyceae_XXX_sp.;	AY664894.1.1756_U	Alveolates-Dinoflagellates	Dinophyceae	Eukaryota; Alveolata; Dinophyta; Dinophyceae; Dinophyceae_X; Dinophyceae_XX; Dinophyceae_XXX; Dinophyceae_XXX_sp.;	0.829895	0.829895	0.829895	1	1	18	0	0	0.849467	4e-06	0.849467	4e-06	0	0.842105	6e-06	0.842105	6e-06	0	0	0.000203	0	0.000282	0	32	117
Alveolates-Dinoflagellates_Alveolates-Dinoflagellates	GU825315.1.1202_U	Alveolates-Dinoflagellates	Dinophyceae	Eukaryota; Alveolata; Dinophyta; Dinophyceae; Dinophyceae_X; Dinophyceae_XX; Dinophyceae_XXX; Dinophyceae_XXX_sp.;	FN690221.1.1692_U	Alveolates-Dinoflagellates	Dinophyceae	Eukaryota; Alveolata; Dinophyta; Dinophyceae; Dinophyceae_X; Dinophyceae_XX; Dinophyceae_XXX; Dinophyceae_XXX_sp.;	0.745579	0.745579	0.745579	3	3	17	0	0.006	0.587793	0.008129	0.599696	0.039289	7	0.750877	0.000212	0.750877	0.000212	0	0.050667	0.032578	5e-06	0.00274	0	32	118
Alveolates-Dinoflagellates_Stramenopiles-MAST	GU825315.1.1202_U	Alveolates-Dinoflagellates	Dinophyceae	Eukaryota; Alveolata; Dinophyta; Dinophyceae; Dinophyceae_X; Dinophyceae_XX; Dinophyceae_XXX; Dinophyceae_XXX_sp.;	KC582992.1.1792_U	Stramenopiles-MAST	MAST-3	Eukaryota; Stramenopiles; Stramenopiles_X; MAST; MAST-3; MAST-3L; MAST-3L_X; MAST-3L_X_sp.;	-0.621633	-0.621633	-0.621633	3	3	16	0	0.048	-0.656545	0.002263	-0.656545	0.002263	0	-0.64502	0.002864	-0.64502	0.002864	0	0.158724	0.014156	1e-06	0.015651	1e-06	32	119
Alveolates-Dinoflagellates_Alveolates-Ciliates	GU825315.1.1202_U	Alveolates-Dinoflagellates	Dinophyceae	Eukaryota; Alveolata; Dinophyta; Dinophyceae; Dinophyceae_X; Dinophyceae_XX; Dinophyceae_XXX; Dinophyceae_XXX_sp.;	EU500004.1.830_U	Alveolates-Ciliates	Spirotrichea	Eukaryota; Alveolata; Ciliophora; Spirotrichea; Strombidiida; Tontoniidae_A; Tontoniidae_A_X; Tontoniidae_A_X_sp.;	0.630074	0.630074	0.630074	6	2	13	4	0.037	-0.139518	0.568909	0.67857	0.005417	4	0.043001	0.861242	0.682753	0.005032	4	0.139515	0.443531	2e-06	0.584809	2e-06	32	120
Alveolates-Dinoflagellates_Stramenopiles-Other	GU825315.1.1202_U	Alveolates-Dinoflagellates	Dinophyceae	Eukaryota; Alveolata; Dinophyta; Dinophyceae; Dinophyceae_X; Dinophyceae_XX; Dinophyceae_XXX; Dinophyceae_XXX_sp.;	EF695169.1.817_U	Stramenopiles-Other	Florenciellales	Eukaryota; Stramenopiles; Ochrophyta; Dictyochophyceae; Dictyochophyceae_X; Florenciellales; Florenciellales_X; Florenciellales_X_sp.;	0.646833	0.646833	0.646833	2	2	17	0	0.027	0.812904	2.3e-05	0.812904	2.3e-05	0	0.667837	0.00178	0.667837	0.00178	0	0.118689	0.000625	0	0.011267	1e-06	32	121
Alveolates-Dinoflagellates_Alveolates-Ciliates	GU825315.1.1202_U	Alveolates-Dinoflagellates	Dinophyceae	Eukaryota; Alveolata; Dinophyta; Dinophyceae; Dinophyceae_X; Dinophyceae_XX; Dinophyceae_XXX; Dinophyceae_XXX_sp.;	KJ759417.1.1743_U	Alveolates-Ciliates	Spirotrichea	Eukaryota; Alveolata; Ciliophora; Spirotrichea; Choreotrichida; Leegaardiellidae_B; Leegaardiella; Leegaardiella_sp.;	0.652493	0.652493	0.652493	4	1	12	3	0.021	-0.275874	0.252944	0.660786	0.005325	3	-0.244396	0.313274	0.668712	0.003336	2	0.10319	0.284052	2e-06	0.346441	2e-06	32	124
Alveolates-Dinoflagellates_Alveolates-Ciliates	GU825315.1.1202_U	Alveolates-Dinoflagellates	Dinophyceae	Eukaryota; Alveolata; Dinophyta; Dinophyceae; Dinophyceae_X; Dinophyceae_XX; Dinophyceae_XXX; Dinophyceae_XXX_sp.;	KC582955.1.1774_U	Alveolates-Ciliates	Spirotrichea	Eukaryota; Alveolata; Ciliophora; Spirotrichea; Strombidiida; Strombidiida_X; Strombidiida_XX; Strombidiida_XX_sp.;	-0.62521	-0.62521	-0.62521	3	3	16	0	0.044	-0.608638	0.005685	-0.608638	0.005685	0	-0.629825	0.003853	-0.629825	0.003853	0	0.151655	0.025636	2e-06	0.01907	2e-06	32	125
Alveolates-Dinoflagellates_Haptophytes	GU825315.1.1202_U	Alveolates-Dinoflagellates	Dinophyceae	Eukaryota; Alveolata; Dinophyta; Dinophyceae; Dinophyceae_X; Dinophyceae_XX; Dinophyceae_XXX; Dinophyceae_XXX_sp.;	HG970975	Haptophytes	Haptophyta	Eukaryota; Hacrobia; Haptophyta; Haptophyta_X; Haptophyta_XX; Haptophyta_XXX; Haptophyta_XXXX; Haptophyta_XXXX_sp.;	0.747675	0.747675	0.747675	3	3	16	0	0.002	0.784393	7e-05	0.784393	7e-05	0	0.726635	0.000426	0.753783	0.00292	6	0.026563	0.001359	0	0.004292	2e-06	32	126
Alveolates-Dinoflagellates_Alveolates-Syndiniales	GU825315.1.1202_U	Alveolates-Dinoflagellates	Dinophyceae	Eukaryota; Alveolata; Dinophyta; Dinophyceae; Dinophyceae_X; Dinophyceae_XX; Dinophyceae_XXX; Dinophyceae_XXX_sp.;	HQ870498.1.849_U	Alveolates-Syndiniales	Dino-Group-III	Eukaryota; Alveolata; Dinophyta; Syndiniales; Dino-Group-III; Dino-Group-III_X; Dino-Group-III_XX; Dino-Group-III_XX_sp.;	0.865989	0.865989	0.865989	2	2	18	0	0	0.874678	1e-06	0.874678	1e-06	0	0.838314	7e-06	0.838314	7e-06	0	0	8.4e-05	0	0.000324	0	32	132
Alveolates-Dinoflagellates_Stramenopiles-Chrysophytes	GU825315.1.1202_U	Alveolates-Dinoflagellates	Dinophyceae	Eukaryota; Alveolata; Dinophyta; Dinophyceae; Dinophyceae_X; Dinophyceae_XX; Dinophyceae_XXX; Dinophyceae_XXX_sp.;	KC582997.1.1775_U	Stramenopiles-Chrysophytes	Chrysophyceae_Clade-I	Eukaryota; Stramenopiles; Ochrophyta; Chrysophyceae; Chrysophyceae_X; Chrysophyceae_Clade-I; Chrysophyceae_Clade-I_X; Chrysophyceae_Clade-I_X_sp.;	-0.687336	-0.687336	-0.687336	3	3	16	0	0.013	-0.766464	0.00013	-0.766464	0.00013	0	-0.7343	0.000344	-0.7343	0.000344	0	0.078309	0.002065	0	0.003731	0	32	142
Alveolates-Dinoflagellates_Stramenopiles-Diatoms	GU825315.1.1202_U	Alveolates-Dinoflagellates	Dinophyceae	Eukaryota; Alveolata; Dinophyta; Dinophyceae; Dinophyceae_X; Dinophyceae_XX; Dinophyceae_XXX; Dinophyceae_XXX_sp.;	EU499988.1.803_U	Stramenopiles-Diatoms	Raphid-pennate	Eukaryota; Stramenopiles; Ochrophyta; Bacillariophyta; Bacillariophyta_X; Raphid-pennate; Raphid-pennate_X; Raphid-pennate_X_sp.;	-0.888342	-0.888342	-0.888342	3	3	16	0	0	-0.846744	5e-06	-0.846744	5e-06	0	-0.850877	4e-06	-0.850877	4e-06	0	0	0.000224	0	0.000218	0	32	145
Alveolates-Dinoflagellates_Cryptophytes	GU825315.1.1202_U	Alveolates-Dinoflagellates	Dinophyceae	Eukaryota; Alveolata; Dinophyta; Dinophyceae; Dinophyceae_X; Dinophyceae_XX; Dinophyceae_XXX; Dinophyceae_XXX_sp.;	GQ863814.1.1651_U	Cryptophytes	Other-unclassified	Eukaryota; Hacrobia; Cryptophyta; Cryptophyceae; Cryptophyceae_X; Goniomonadales; Goniomonas; Goniomonas_sp.;	0.721358	0.721358	0.721358	1	1	18	0	0.002	0.673673	0.001566	0.673673	0.001566	0	0.724879	0.000446	0.724879	0.000446	0	0.026563	0.01101	1e-06	0.004422	1e-06	32	146
Alveolates-Dinoflagellates_Stramenopiles-MAST	GU825315.1.1202_U	Alveolates-Dinoflagellates	Dinophyceae	Eukaryota; Alveolata; Dinophyta; Dinophyceae; Dinophyceae_X; Dinophyceae_XX; Dinophyceae_XXX; Dinophyceae_XXX_sp.;	AJ402350.1.1758_U	Stramenopiles-MAST	MAST-1	Eukaryota; Stramenopiles; Stramenopiles_X; MAST; MAST-1; MAST-1D; MAST-1D_X; MAST-1D_X_sp.;	0.72766	0.72766	0.72766	3	3	16	0	0.001	0.836289	8e-06	0.836289	8e-06	0	0.777534	8.9e-05	0.777534	8.9e-05	0	0.017494	0.000325	0	0.001577	0	32	150
Alveolates-Dinoflagellates_Chl	GU825315.1.1202_U	Alveolates-Dinoflagellates	Dinophyceae	Eukaryota; Alveolata; Dinophyta; Dinophyceae; Dinophyceae_X; Dinophyceae_XX; Dinophyceae_XXX; Dinophyceae_XXX_sp.;	Chl	Chl	NA	NA	-0.660248	-0.660248	-0.660248	1	1	19	0	0.026	-0.610866	0.005464	-0.610866	0.005464	0	-0.640351	0.003142	0.657143	0.00777	4	0.116273	0.025099	2e-06	0.016709	2e-06	32	205
Alveolates-Dinoflagellates_is10PM	GU825315.1.1202_U	Alveolates-Dinoflagellates	Dinophyceae	Eukaryota; Alveolata; Dinophyta; Dinophyceae; Dinophyceae_X; Dinophyceae_XX; Dinophyceae_XXX; Dinophyceae_XXX_sp.;	is10PM	is10PM	NA	NA	0.649155	0.649155	0.649155	6	2	14	4	0.037	-0.008211	0.973387	0.629761	0.011869	4	0.026352	0.91472	0.694365	0.004075	4	0.139515	0.571647	3e-06	0.600804	2e-06	32	209
Alveolates-Dinoflagellates_is2AM	GU825315.1.1202_U	Alveolates-Dinoflagellates	Dinophyceae	Eukaryota; Alveolata; Dinophyta; Dinophyceae; Dinophyceae_X; Dinophyceae_XX; Dinophyceae_XXX; Dinophyceae_XXX_sp.;	is2AM	is2AM	NA	NA	0.649155	0.649155	0.649155	6	3	14	3	0.021	-0.38908	0.099671	0.636905	0.007972	3	-0.421637	0.072175	0.677365	0.003942	3	0.10319	0.161378	3e-06	0.139973	2e-06	32	210
Alveolates-Dinoflagellates_is6AM	GU825315.1.1202_U	Alveolates-Dinoflagellates	Dinophyceae	Eukaryota; Alveolata; Dinophyta; Dinophyceae; Dinophyceae_X; Dinophyceae_XX; Dinophyceae_XXX; Dinophyceae_XXX_sp.;	is6AM	is6AM	NA	NA	0.679006	0.679006	0.679006	3	1	17	2	0.006	-0.436143	0.061933	0.634903	0.006178	2	-0.368932	0.120091	0.661438	0.003833	2	0.050667	0.120775	2e-06	0.19286	2e-06	32	211
Alveolates-Dinoflagellates_is10AM	GU825315.1.1202_U	Alveolates-Dinoflagellates	Dinophyceae	Eukaryota; Alveolata; Dinophyta; Dinophyceae; Dinophyceae_X; Dinophyceae_XX; Dinophyceae_XXX; Dinophyceae_XXX_sp.;	is10AM	is10AM	NA	NA	0.679006	0.679006	0.679006	3	2	17	1	0.003	0.167261	0.493707	0.62483	0.016891	-5	0.079057	0.747672	0.64775	0.022752	7	0.033974	0.412982	3e-06	0.546758	4e-06	32	212
Alveolates-Dinoflagellates_is2PM	GU825315.1.1202_U	Alveolates-Dinoflagellates	Dinophyceae	Eukaryota; Alveolata; Dinophyta; Dinophyceae; Dinophyceae_X; Dinophyceae_XX; Dinophyceae_XXX; Dinophyceae_XXX_sp.;	is2PM	is2PM	NA	NA	0.679006	0.679006	0.679006	3	3	17	0	0.004	0.596736	0.006993	0.659655	0.014163	-6	0.632456	0.003664	0.632456	0.003664	0	0.040295	0.029506	3e-06	0.018467	2e-06	32	213
Alveolates-Syndiniales_Stramenopiles-MAST	KF130214.1.1759_U	Alveolates-Syndiniales	Dino-Group-II	Eukaryota; Alveolata; Dinophyta; Syndiniales; Dino-Group-II; Dino-Group-II-Clade-10-and-11; Dino-Group-II-Clade-10-and-11_X; Dino-Group-II-Clade-10-and-11_X_sp.;	KF129607.1.1760_U	Stramenopiles-MAST	MAST-7	Eukaryota; Stramenopiles; Stramenopiles_X; MAST; MAST-7; MAST-7D; MAST-7D_X; MAST-7D_X_sp.;	0.795034	0.795034	0.795034	1	1	19	0	0	0.771542	0.000109	0.771542	0.000109	0	0.788547	6e-05	0.788547	6e-05	0	0	0.001841	0	0.001203	0	33	90
Alveolates-Syndiniales_Stramenopiles-Diatoms	KF130214.1.1759_U	Alveolates-Syndiniales	Dino-Group-II	Eukaryota; Alveolata; Dinophyta; Syndiniales; Dino-Group-II; Dino-Group-II-Clade-10-and-11; Dino-Group-II-Clade-10-and-11_X; Dino-Group-II-Clade-10-and-11_X_sp.;	GU822947.1.1074_U	Stramenopiles-Diatoms	Haslea	Eukaryota; Stramenopiles; Ochrophyta; Bacillariophyta; Bacillariophyta_X; Raphid-pennate; Haslea; Haslea_sp.;	0.656757	0.656757	0.656757	2	2	17	0	0.028	0.64946	0.002619	0.64946	0.002619	0	0.563381	0.01201	0.563381	0.01201	0	0.120985	0.015484	1e-06	0.042195	3e-06	33	139
Stramenopiles-Other_Alveolates-Ciliates	GU823203.1.1203_U	Stramenopiles-Other	Dictyochales	Eukaryota; Stramenopiles; Ochrophyta; Dictyochophyceae; Dictyochophyceae_X; Dictyochales; Dictyochales_X; Dictyochales_X_sp.;	KF130183.1.1714_U	Alveolates-Ciliates	Colpodea	Eukaryota; Alveolata; Ciliophora; Colpodea; Colpodea-1; Colpodea-1_X; Colpodea-1_XX; Colpodea-1_XX_sp.;	0.653038	0.653038	0.653038	3	2	17	1	0.01	0.516055	0.023707	0.650694	0.003452	1	0.585648	0.008423	0.660625	0.002841	1	0.067958	0.06538	2e-06	0.032796	1e-06	35	48
Stramenopiles-Other_Alveolates-Ciliates	GU823203.1.1203_U	Stramenopiles-Other	Dictyochales	Eukaryota; Stramenopiles; Ochrophyta; Dictyochophyceae; Dictyochophyceae_X; Dictyochales; Dictyochales_X; Dictyochales_X_sp.;	GU819408.1.1363_U	Alveolates-Ciliates	Colpodea	Eukaryota; Alveolata; Ciliophora; Colpodea; Colpodea-1; Colpodea-1_X; Colpodea-1_XX; Colpodea-1_XX_sp.;	-0.632229	-0.632229	-0.632229	2	5	15	-3	0.031	-0.091365	0.709899	-0.67171	0.006098	-4	-0.11233	0.647062	-0.7042	0.003383	-4	0.127199	0.495136	2e-06	0.509076	2e-06	35	58
Stramenopiles-Other_Alveolates-Dinoflagellates	GU823203.1.1203_U	Stramenopiles-Other	Dictyochales	Eukaryota; Stramenopiles; Ochrophyta; Dictyochophyceae; Dictyochophyceae_X; Dictyochales; Dictyochales_X; Dictyochales_X_sp.;	GU825000.1.1197_U	Alveolates-Dinoflagellates	Dinophyceae	Eukaryota; Alveolata; Dinophyta; Dinophyceae; Dinophyceae_X; Dinophyceae_XX; Dinophyceae_XXX; Dinophyceae_XXX_sp.;	0.599405	0.599405	0.599405	1	7	13	-6	0.038	0.272361	0.259283	0.892571	4.1e-05	-6	0.174638	0.474563	0.862637	0.000147	-6	0.141376	0.288116	0	0.43539	0	35	64
Stramenopiles-Other_Alveolates-Dinoflagellates	GU823203.1.1203_U	Stramenopiles-Other	Dictyochales	Eukaryota; Stramenopiles; Ochrophyta; Dictyochophyceae; Dictyochophyceae_X; Dictyochales; Dictyochales_X; Dictyochales_X_sp.;	EU780629.1.1715_U	Alveolates-Dinoflagellates	Dinophyceae	Eukaryota; Alveolata; Dinophyta; Dinophyceae; Dinophyceae_X; Dinophyceae_XX; Dinophyceae_XXX; Dinophyceae_XXX_sp.;	0.688424	0.688424	0.688424	1	1	18	0	0.005	0.698145	0.000887	0.698145	0.000887	0	0.662571	0.001993	0.662571	0.001993	0	0.0456	0.007409	1e-06	0.012288	1e-06	35	73
Stramenopiles-Other_Alveolates-Ciliates	GU823203.1.1203_U	Stramenopiles-Other	Dictyochales	Eukaryota; Stramenopiles; Ochrophyta; Dictyochophyceae; Dictyochophyceae_X; Dictyochales; Dictyochales_X; Dictyochales_X_sp.;	AY665059.1.1720_U	Alveolates-Ciliates	Oligohymenophorea	Eukaryota; Alveolata; Ciliophora; Oligohymenophorea; Scuticociliatia; Scuticociliatia-1; Scuticociliatia-1_X; Scuticociliatia-1_X_sp.;	0.615745	0.615745	0.615745	1	7	9	-6	0.03	0.034907	0.887185	0.706401	0.006953	-6	-0.095698	0.696747	0.71978	0.005536	-6	0.125466	0.548891	2e-06	0.52871	2e-06	35	77
Stramenopiles-Other_Rhizaria-Acantharia	GU823203.1.1203_U	Stramenopiles-Other	Dictyochales	Eukaryota; Stramenopiles; Ochrophyta; Dictyochophyceae; Dictyochophyceae_X; Dictyochales; Dictyochales_X; Dictyochales_X_sp.;	HM561210.1.973_U	Rhizaria-Acantharia	Acantharea	Eukaryota; Rhizaria; Radiolaria; Acantharea; Acantharea_X; Acantharea_XX; Acantharea_XXX; Acantharea_XXX_sp.;	0.612019	0.612019	0.612019	2	7	13	-5	0.042	-0.252695	0.296598	0.554463	0.039621	-5	-0.279631	0.246273	0.570485	0.033143	-5	0.148696	0.31117	5e-06	0.301069	5e-06	35	80
Stramenopiles-Other_Haptophytes	GU823203.1.1203_U	Stramenopiles-Other	Dictyochales	Eukaryota; Stramenopiles; Ochrophyta; Dictyochophyceae; Dictyochophyceae_X; Dictyochales; Dictyochales_X; Dictyochales_X_sp.;	JX680347	Haptophytes	Haptophyta_Clade_HAP3	Eukaryota; Hacrobia; Haptophyta; Haptophyta_Clade_HAP3; Haptophyta_Clade_HAP3_X; Haptophyta_Clade_HAP3_XX; Haptophyta_Clade_HAP3_XXX; Haptophyta_Clade_HAP3_XXX_sp.;	-0.61542	-0.61542	-0.61542	2	7	13	-5	0.036	0.375776	0.112848	-0.755552	0.001777	-5	0.366711	0.122512	-0.776678	0.001086	-5	0.137718	0.174384	1e-06	0.195497	1e-06	35	94
Stramenopiles-Other_Alveolates-Syndiniales	GU823203.1.1203_U	Stramenopiles-Other	Dictyochales	Eukaryota; Stramenopiles; Ochrophyta; Dictyochophyceae; Dictyochophyceae_X; Dictyochales; Dictyochales_X; Dictyochales_X_sp.;	GU820270.1.1197_U	Alveolates-Syndiniales	Dino-Group-I	Eukaryota; Alveolata; Dinophyta; Syndiniales; Dino-Group-I; Dino-Group-I-Clade-6; Dino-Group-I-Clade-6_X; Dino-Group-I-Clade-6_X_sp.;	-0.67755	-0.67755	-0.67755	1	2	17	-1	0.007	-0.353789	0.137282	-0.759865	0.001613	-5	-0.428195	0.0674	-0.673902	0.002165	-1	0.055193	0.197057	1e-06	0.134474	1e-06	35	104
Stramenopiles-Other_Rhizaria-Acantharia	GU823203.1.1203_U	Stramenopiles-Other	Dictyochales	Eukaryota; Stramenopiles; Ochrophyta; Dictyochophyceae; Dictyochophyceae_X; Dictyochales; Dictyochales_X; Dictyochales_X_sp.;	JN811185.1.1695_U	Rhizaria-Acantharia	Lychnaspis	Eukaryota; Rhizaria; Radiolaria; Acantharea; Arthracanthida-Symphyacanthida; Arthracanthida-Symphyacanthida_X; Lychnaspis; Lychnaspis_giltschi;	-0.657579	-0.657579	-0.657579	2	5	15	-3	0.01	0.135773	0.579428	-0.594505	0.024947	5	0.177271	0.467822	0.58737	0.013168	2	0.067958	0.446952	4e-06	0.431773	3e-06	35	114
Stramenopiles-Other_Stramenopiles-Other	GU823203.1.1203_U	Stramenopiles-Other	Dictyochales	Eukaryota; Stramenopiles; Ochrophyta; Dictyochophyceae; Dictyochophyceae_X; Dictyochales; Dictyochales_X; Dictyochales_X_sp.;	EF695169.1.817_U	Stramenopiles-Other	Florenciellales	Eukaryota; Stramenopiles; Ochrophyta; Dictyochophyceae; Dictyochophyceae_X; Florenciellales; Florenciellales_X; Florenciellales_X_sp.;	-0.611737	-0.611737	-0.611737	2	7	13	-5	0.041	0.268156	0.267	-0.694575	0.00584	-5	0.201054	0.409171	-0.739274	0.002516	-5	0.146981	0.293469	2e-06	0.400801	1e-06	35	121
Stramenopiles-Other_Haptophytes	GU823203.1.1203_U	Stramenopiles-Other	Dictyochales	Eukaryota; Stramenopiles; Ochrophyta; Dictyochophyceae; Dictyochophyceae_X; Dictyochales; Dictyochales_X; Dictyochales_X_sp.;	HG970975	Haptophytes	Haptophyta	Eukaryota; Hacrobia; Haptophyta; Haptophyta_X; Haptophyta_XX; Haptophyta_XXX; Haptophyta_XXXX; Haptophyta_XXXX_sp.;	-0.593295	-0.593295	-0.593295	3	1	15	2	0.049	0.022174	0.928204	0.681939	0.010244	6	-0.092186	0.707399	-0.763736	0.002377	-6	0.160556	0.559521	3e-06	0.531703	1e-06	35	126
Stramenopiles-Other_Alveolates-Ciliates	GU823203.1.1203_U	Stramenopiles-Other	Dictyochales	Eukaryota; Stramenopiles; Ochrophyta; Dictyochophyceae; Dictyochophyceae_X; Dictyochales; Dictyochales_X; Dictyochales_X_sp.;	KF129723.1.1735_U	Alveolates-Ciliates	Spirotrichea	Eukaryota; Alveolata; Ciliophora; Spirotrichea; Strombidiida_D; Strombidiida_D_X; Strombidiida_D_XX; Strombidiida_D_XX_sp.;	0.628714	0.628714	0.628714	1	2	17	-1	0.035	0.404912	0.085487	0.642186	0.004058	-1	0.404563	0.085783	0.676304	0.002059	-1	0.135676	0.147373	2e-06	0.15611	1e-06	35	128
Stramenopiles-Other_Stramenopiles-MAST	GU823203.1.1203_U	Stramenopiles-Other	Dictyochales	Eukaryota; Stramenopiles; Ochrophyta; Dictyochophyceae; Dictyochophyceae_X; Dictyochales; Dictyochales_X; Dictyochales_X_sp.;	JQ781935.1.1793_U	Stramenopiles-MAST	MAST-7	Eukaryota; Stramenopiles; Stramenopiles_X; MAST; MAST-7; MAST-7D; MAST-7D_X; MAST-7D_X_sp.;	0.671783	0.671783	0.671783	1	1	19	0	0.01	0.660308	0.002091	0.660308	0.002091	0	0.688049	0.001128	0.688049	0.001128	0	0.067958	0.013411	1e-06	0.008356	1e-06	35	130
Stramenopiles-Other_Stramenopiles-Diatoms	GU823203.1.1203_U	Stramenopiles-Other	Dictyochales	Eukaryota; Stramenopiles; Ochrophyta; Dictyochophyceae; Dictyochophyceae_X; Dictyochales; Dictyochales_X; Dictyochales_X_sp.;	GQ468541.1.1704_U	Stramenopiles-Diatoms	Cylindrotheca	Eukaryota; Stramenopiles; Ochrophyta; Bacillariophyta; Bacillariophyta_X; Raphid-pennate; Cylindrotheca; Cylindrotheca_closterium;	-0.60742	-0.60742	-0.60742	2	3	13	-1	0.043	-0.327761	0.170724	-0.52618	0.024891	-1	-0.31154	0.194157	-0.592669	0.009542	1	0.150291	0.224999	4e-06	0.260481	3e-06	35	131
Stramenopiles-Other_Alveolates-Ciliates	GU823203.1.1203_U	Stramenopiles-Other	Dictyochales	Eukaryota; Stramenopiles; Ochrophyta; Dictyochophyceae; Dictyochophyceae_X; Dictyochales; Dictyochales_X; Dictyochales_X_sp.;	KJ762895.1.1749_U	Alveolates-Ciliates	Colpodea	Eukaryota; Alveolata; Ciliophora; Colpodea; Colpodea-1; Colpodea-1_X; Colpodea-1_XX; Colpodea-1_XX_sp.;	0.713534	0.713534	0.713534	1	1	19	0	0.004	0.678767	0.001397	0.678767	0.001397	0	0.657306	0.002227	-0.69967	0.005345	-5	0.040295	0.010197	1e-06	0.013268	2e-06	35	134
Stramenopiles-Other_Sal	GU823203.1.1203_U	Stramenopiles-Other	Dictyochales	Eukaryota; Stramenopiles; Ochrophyta; Dictyochophyceae; Dictyochophyceae_X; Dictyochales; Dictyochales_X; Dictyochales_X_sp.;	Sal	Sal	NA	NA	-0.615437	-0.615437	-0.615437	1	1	17	0	0.021	-0.643273	0.002966	-0.643273	0.002966	0	-0.550412	0.014609	-0.603219	0.029068	-6	0.10319	0.016822	2e-06	0.048501	5e-06	35	203
Alveolates-Ciliates_Stramenopiles-MAST	KY290313.1.1621_U	Alveolates-Ciliates	Spirotrichea	Eukaryota; Alveolata; Ciliophora; Spirotrichea; Choreotrichida; Leegaardiellidae_B; Leegaardiella; Leegaardiella_sp.;	JQ782004.1.1784_U	Stramenopiles-MAST	MAST-1	Eukaryota; Stramenopiles; Stramenopiles_X; MAST; MAST-1; MAST-1C; MAST-1C_X; MAST-1C_X_sp.;	-0.713878	-0.713878	-0.713878	3	3	16	0	0.011	-0.612277	0.005328	-0.612277	0.005328	0	-0.584615	0.008567	-0.584615	0.008567	0	0.071521	0.024673	2e-06	0.033184	3e-06	36	37
Alveolates-Ciliates_Stramenopiles-MAST	KY290313.1.1621_U	Alveolates-Ciliates	Spirotrichea	Eukaryota; Alveolata; Ciliophora; Spirotrichea; Choreotrichida; Leegaardiellidae_B; Leegaardiella; Leegaardiella_sp.;	KF129967.1.1739_U	Stramenopiles-MAST	MAST-9	Eukaryota; Stramenopiles; Stramenopiles_X; MAST; MAST-9; MAST-9A; MAST-9A_X; MAST-9A_X_sp.;	0.659178	0.659178	0.659178	3	3	16	0	0.028	0.679916	0.001361	0.679916	0.001361	0	0.689368	0.001094	0.689368	0.001094	0	0.120985	0.010036	1e-06	0.008187	1e-06	36	38
Alveolates-Ciliates_Alveolates-Dinoflagellates	KY290313.1.1621_U	Alveolates-Ciliates	Spirotrichea	Eukaryota; Alveolata; Ciliophora; Spirotrichea; Choreotrichida; Leegaardiellidae_B; Leegaardiella; Leegaardiella_sp.;	KF129831.1.1758_U	Alveolates-Dinoflagellates	Dinophyceae	Eukaryota; Alveolata; Dinophyta; Dinophyceae; Dinophyceae_X; Dinophyceae_XX; Dinophyceae_XXX; Dinophyceae_XXX_sp.;	-0.682767	-0.682767	-0.682767	1	1	19	0	0.01	-0.697223	0.000907	-0.697223	0.000907	0	-0.72005	0.000508	-0.72005	0.000508	0	0.067958	0.007515	1e-06	0.004853	1e-06	36	40
Alveolates-Ciliates_Alveolates-Dinoflagellates	KY290313.1.1621_U	Alveolates-Ciliates	Spirotrichea	Eukaryota; Alveolata; Ciliophora; Spirotrichea; Choreotrichida; Leegaardiellidae_B; Leegaardiella; Leegaardiella_sp.;	FJ217814.1.1521_U	Alveolates-Dinoflagellates	Azadinium	Eukaryota; Alveolata; Dinophyta; Dinophyceae; Dinophyceae_X; Dinophyceae_XX; Azadinium; Azadinium_spinosum;	-0.733358	-0.733358	-0.733358	1	1	18	0	0.001	-0.697773	0.000895	-0.697773	0.000895	0	-0.762742	0.000146	-0.762742	0.000146	0	0.017494	0.007453	1e-06	0.002163	0	36	43
Alveolates-Ciliates_Stramenopiles-Pelagophytes	KY290313.1.1621_U	Alveolates-Ciliates	Spirotrichea	Eukaryota; Alveolata; Ciliophora; Spirotrichea; Choreotrichida; Leegaardiellidae_B; Leegaardiella; Leegaardiella_sp.;	GU196150.1.1374_U	Stramenopiles-Pelagophytes	Pelagomonadaceae_clade_A	Eukaryota; Stramenopiles; Ochrophyta; Pelagophyceae; Pelagomonadales; Pelagomonadaceae; Pelagomonadaceae_clade_A; Pelagomonadaceae_clade_A_sp.;	-0.637046	-0.637046	-0.637046	3	2	13	1	0.033	-0.302569	0.207994	-0.51822	0.027584	1	-0.323233	0.177062	-0.547804	0.018601	1	0.131118	0.253344	4e-06	0.246729	4e-06	36	52
Alveolates-Ciliates_Stramenopiles-Other	KY290313.1.1621_U	Alveolates-Ciliates	Spirotrichea	Eukaryota; Alveolata; Ciliophora; Spirotrichea; Choreotrichida; Leegaardiellidae_B; Leegaardiella; Leegaardiella_sp.;	EU499990.1.824_U	Stramenopiles-Other	Triparma	Eukaryota; Stramenopiles; Ochrophyta; Bolidophyceae; Parmales; Triparmaceae; Triparma; Triparma_eleuthera;	0.63648	0.63648	0.63648	3	3	16	0	0.036	0.567806	0.011214	0.567806	0.011214	0	0.547253	0.015305	0.547253	0.015305	0	0.137718	0.039944	3e-06	0.049952	4e-06	36	59
Alveolates-Ciliates_Alveolates-Dinoflagellates	KY290313.1.1621_U	Alveolates-Ciliates	Spirotrichea	Eukaryota; Alveolata; Ciliophora; Spirotrichea; Choreotrichida; Leegaardiellidae_B; Leegaardiella; Leegaardiella_sp.;	HE611580.1.1746_U	Alveolates-Dinoflagellates	Gyrodinium	Eukaryota; Alveolata; Dinophyta; Dinophyceae; Dinophyceae_X; Dinophyceae_XX; Gyrodinium; Gyrodinium_sp.;	-0.689648	-0.689648	-0.689648	2	2	17	0	0.005	-0.645661	0.002828	-0.645661	0.002828	0	-0.683216	0.001262	-0.683216	0.001262	0	0.0456	0.01632	2e-06	0.009028	1e-06	36	65
Alveolates-Ciliates_Alveolates-Dinoflagellates	KY290313.1.1621_U	Alveolates-Ciliates	Spirotrichea	Eukaryota; Alveolata; Ciliophora; Spirotrichea; Choreotrichida; Leegaardiellidae_B; Leegaardiella; Leegaardiella_sp.;	HM581766.1.1782_U	Alveolates-Dinoflagellates	Prorocentrum	Eukaryota; Alveolata; Dinophyta; Dinophyceae; Dinophyceae_X; Dinophyceae_XX; Prorocentrum; Prorocentrum_sp.;	-0.671788	-0.671788	-0.671788	3	3	16	0	0.015	-0.546653	0.015441	-0.546653	0.015441	0	-0.591129	0.007689	-0.591129	0.007689	0	0.085181	0.048813	3e-06	0.030748	2e-06	36	66
Alveolates-Ciliates_Alveolates-Ciliates	KY290313.1.1621_U	Alveolates-Ciliates	Spirotrichea	Eukaryota; Alveolata; Ciliophora; Spirotrichea; Choreotrichida; Leegaardiellidae_B; Leegaardiella; Leegaardiella_sp.;	JX188331.1.1726_U	Alveolates-Ciliates	Oligohymenophorea	Eukaryota; Alveolata; Ciliophora; Oligohymenophorea; Scuticociliatia; Scuticociliatia-1; Scuticociliatia-1_X; Scuticociliatia-1_X_sp.;	0.645929	0.645929	0.645929	1	1	18	0	0.034	0.661753	0.002028	0.661753	0.002028	0	0.697409	0.000903	0.697409	0.000903	0	0.133349	0.013199	1e-06	0.007221	1e-06	36	69
Alveolates-Ciliates_Alveolates-Ciliates	KY290313.1.1621_U	Alveolates-Ciliates	Spirotrichea	Eukaryota; Alveolata; Ciliophora; Spirotrichea; Choreotrichida; Leegaardiellidae_B; Leegaardiella; Leegaardiella_sp.;	AY665059.1.1720_U	Alveolates-Ciliates	Oligohymenophorea	Eukaryota; Alveolata; Ciliophora; Oligohymenophorea; Scuticociliatia; Scuticociliatia-1; Scuticociliatia-1_X; Scuticociliatia-1_X_sp.;	0.686239	0.686239	0.686239	3	3	16	0	0.017	0.641204	0.00309	0.641204	0.00309	0	0.674429	0.00154	0.674429	0.00154	0	0.091523	0.017275	2e-06	0.010255	1e-06	36	77
Alveolates-Ciliates_Rhizaria-Acantharia	KY290313.1.1621_U	Alveolates-Ciliates	Spirotrichea	Eukaryota; Alveolata; Ciliophora; Spirotrichea; Choreotrichida; Leegaardiellidae_B; Leegaardiella; Leegaardiella_sp.;	HM561210.1.973_U	Rhizaria-Acantharia	Acantharea	Eukaryota; Rhizaria; Radiolaria; Acantharea; Acantharea_X; Acantharea_XX; Acantharea_XXX; Acantharea_XXX_sp.;	0.677681	0.677681	0.677681	3	3	16	0	0.018	0.629439	0.003881	0.629439	0.003881	0	0.650703	0.002553	0.650703	0.002553	0	0.094526	0.020171	2e-06	0.014562	1e-06	36	80
Alveolates-Ciliates_Alveolates-Dinoflagellates	KY290313.1.1621_U	Alveolates-Ciliates	Spirotrichea	Eukaryota; Alveolata; Ciliophora; Spirotrichea; Choreotrichida; Leegaardiellidae_B; Leegaardiella; Leegaardiella_sp.;	GU822346.1.1073_U	Alveolates-Dinoflagellates	Protoperidinium	Eukaryota; Alveolata; Dinophyta; Dinophyceae; Dinophyceae_X; Dinophyceae_XX; Protoperidinium; Protoperidinium_sp.;	0.702974	0.702974	0.702974	1	1	18	0	0.006	0.62847	0.003953	0.62847	0.003953	0	0.729789	0.00039	0.729789	0.00039	0	0.050667	0.020374	2e-06	0.004072	0	36	95
Alveolates-Ciliates_Alveolates-Dinoflagellates	KY290313.1.1621_U	Alveolates-Ciliates	Spirotrichea	Eukaryota; Alveolata; Ciliophora; Spirotrichea; Choreotrichida; Leegaardiellidae_B; Leegaardiella; Leegaardiella_sp.;	EU793087.1.924_U	Alveolates-Dinoflagellates	Dinophyceae	Eukaryota; Alveolata; Dinophyta; Dinophyceae; Dinophyceae_X; Dinophyceae_XX; Dinophyceae_XXX; Dinophyceae_XXX_sp.;	-0.651811	-0.651811	-0.651811	2	2	17	0	0.033	-0.577286	0.009651	-0.577286	0.009651	0	-0.673694	0.001565	-0.673694	0.001565	0	0.131118	0.036453	3e-06	0.010353	1e-06	36	97
Alveolates-Ciliates_Stramenopiles-Other	KY290313.1.1621_U	Alveolates-Ciliates	Spirotrichea	Eukaryota; Alveolata; Ciliophora; Spirotrichea; Choreotrichida; Leegaardiellidae_B; Leegaardiella; Leegaardiella_sp.;	EU500152.1.842_U	Stramenopiles-Other	Rhizochromulinales	Eukaryota; Stramenopiles; Ochrophyta; Dictyochophyceae; Dictyochophyceae_X; Rhizochromulinales; Rhizochromulinales_X; Rhizochromulinales_X_sp.;	-0.711898	-0.711898	-0.711898	1	1	15	0	0.01	-0.724024	0.000457	-0.724024	0.000457	0	-0.669302	0.001724	-0.669302	0.001724	0	0.067958	0.004807	1e-06	0.011063	1e-06	36	102
Alveolates-Ciliates_Alveolates-Dinoflagellates	KY290313.1.1621_U	Alveolates-Ciliates	Spirotrichea	Eukaryota; Alveolata; Ciliophora; Spirotrichea; Choreotrichida; Leegaardiellidae_B; Leegaardiella; Leegaardiella_sp.;	AY664921.1.1754_U	Alveolates-Dinoflagellates	Prorocentrum	Eukaryota; Alveolata; Dinophyta; Dinophyceae; Dinophyceae_X; Dinophyceae_XX; Prorocentrum; Prorocentrum_sp.;	-0.682651	-0.682651	-0.682651	3	3	16	0	0.015	-0.449787	0.053335	0.500382	0.04079	-2	-0.649825	0.002599	-0.649825	0.002599	0	0.085181	0.11034	5e-06	0.014707	1e-06	36	111
Alveolates-Ciliates_Alveolates-Ciliates	KY290313.1.1621_U	Alveolates-Ciliates	Spirotrichea	Eukaryota; Alveolata; Ciliophora; Spirotrichea; Choreotrichida; Leegaardiellidae_B; Leegaardiella; Leegaardiella_sp.;	DQ120009.1.1729_U	Alveolates-Ciliates	Litostomatea	Eukaryota; Alveolata; Ciliophora; Litostomatea; Cyclotrichia; Cyclotrichia_X; Cyclotrichia_XX; Cyclotrichia_XX_sp.;	0.635085	0.635085	0.635085	3	3	16	0	0.035	0.547533	0.015242	-0.5703	0.02107	-3	0.607818	0.005768	0.607818	0.005768	0	0.135676	0.04846	4e-06	0.025273	2e-06	36	113
Alveolates-Ciliates_Alveolates-Dinoflagellates	KY290313.1.1621_U	Alveolates-Ciliates	Spirotrichea	Eukaryota; Alveolata; Ciliophora; Spirotrichea; Choreotrichida; Leegaardiellidae_B; Leegaardiella; Leegaardiella_sp.;	AY664894.1.1756_U	Alveolates-Dinoflagellates	Dinophyceae	Eukaryota; Alveolata; Dinophyta; Dinophyceae; Dinophyceae_X; Dinophyceae_XX; Dinophyceae_XXX; Dinophyceae_XXX_sp.;	-0.741975	-0.741975	-0.741975	1	1	18	0	0.002	-0.761324	0.000153	-0.761324	0.000153	0	-0.788758	6e-05	-0.788758	6e-05	0	0.026563	0.002304	0	0.001197	0	36	117
Alveolates-Ciliates_Stramenopiles-MAST	KY290313.1.1621_U	Alveolates-Ciliates	Spirotrichea	Eukaryota; Alveolata; Ciliophora; Spirotrichea; Choreotrichida; Leegaardiellidae_B; Leegaardiella; Leegaardiella_sp.;	KC582992.1.1792_U	Stramenopiles-MAST	MAST-3	Eukaryota; Stramenopiles; Stramenopiles_X; MAST; MAST-3; MAST-3L; MAST-3L_X; MAST-3L_X_sp.;	0.641284	0.641284	0.641284	3	3	16	0	0.035	0.614892	0.005083	0.614892	0.005083	0	0.677505	0.001437	0.677505	0.001437	0	0.135676	0.023897	2e-06	0.009804	1e-06	36	119
Alveolates-Ciliates_Alveolates-Ciliates	KY290313.1.1621_U	Alveolates-Ciliates	Spirotrichea	Eukaryota; Alveolata; Ciliophora; Spirotrichea; Choreotrichida; Leegaardiellidae_B; Leegaardiella; Leegaardiella_sp.;	KC582955.1.1774_U	Alveolates-Ciliates	Spirotrichea	Eukaryota; Alveolata; Ciliophora; Spirotrichea; Strombidiida; Strombidiida_X; Strombidiida_XX; Strombidiida_XX_sp.;	0.6646	0.6646	0.6646	3	3	16	0	0.018	0.567096	0.011339	0.567096	0.011339	0	0.568292	0.011129	0.568292	0.011129	0	0.094526	0.040221	3e-06	0.040071	3e-06	36	125
Alveolates-Ciliates_Haptophytes	KY290313.1.1621_U	Alveolates-Ciliates	Spirotrichea	Eukaryota; Alveolata; Ciliophora; Spirotrichea; Choreotrichida; Leegaardiellidae_B; Leegaardiella; Leegaardiella_sp.;	HG970975	Haptophytes	Haptophyta	Eukaryota; Hacrobia; Haptophyta; Haptophyta_X; Haptophyta_XX; Haptophyta_XXX; Haptophyta_XXXX; Haptophyta_XXXX_sp.;	-0.640429	-0.640429	-0.640429	3	3	16	0	0.028	-0.549423	0.014824	-0.605486	0.036944	7	-0.547013	0.015359	-0.557895	0.059441	7	0.120985	0.047684	5e-06	0.050027	7e-06	36	126
Alveolates-Ciliates_Alveolates-Syndiniales	KY290313.1.1621_U	Alveolates-Ciliates	Spirotrichea	Eukaryota; Alveolata; Ciliophora; Spirotrichea; Choreotrichida; Leegaardiellidae_B; Leegaardiella; Leegaardiella_sp.;	HQ870498.1.849_U	Alveolates-Syndiniales	Dino-Group-III	Eukaryota; Alveolata; Dinophyta; Syndiniales; Dino-Group-III; Dino-Group-III_X; Dino-Group-III_XX; Dino-Group-III_XX_sp.;	-0.688694	-0.688694	-0.688694	2	2	18	0	0.009	-0.540021	0.017	0.549065	0.027611	-3	-0.637924	0.003296	-0.637924	0.003296	0	0.063892	0.052091	4e-06	0.017201	2e-06	36	132
Alveolates-Ciliates_Stramenopiles-Diatoms	KY290313.1.1621_U	Alveolates-Ciliates	Spirotrichea	Eukaryota; Alveolata; Ciliophora; Spirotrichea; Choreotrichida; Leegaardiellidae_B; Leegaardiella; Leegaardiella_sp.;	GU822947.1.1074_U	Stramenopiles-Diatoms	Haslea	Eukaryota; Stramenopiles; Ochrophyta; Bacillariophyta; Bacillariophyta_X; Raphid-pennate; Haslea; Haslea_sp.;	0.645102	0.645102	0.645102	4	4	15	0	0.036	0.564934	0.011726	0.564934	0.011726	0	0.591209	0.007679	0.591209	0.007679	0	0.137718	0.041013	3e-06	0.030742	2e-06	36	139
Alveolates-Ciliates_Stramenopiles-Diatoms	KY290313.1.1621_U	Alveolates-Ciliates	Spirotrichea	Eukaryota; Alveolata; Ciliophora; Spirotrichea; Choreotrichida; Leegaardiellidae_B; Leegaardiella; Leegaardiella_sp.;	EU499988.1.803_U	Stramenopiles-Diatoms	Raphid-pennate	Eukaryota; Stramenopiles; Ochrophyta; Bacillariophyta; Bacillariophyta_X; Raphid-pennate; Raphid-pennate_X; Raphid-pennate_X_sp.;	0.653368	0.653368	0.653368	3	3	16	0	0.028	0.460466	0.047263	0.53972	0.07011	7	0.61748	0.004849	0.61748	0.004849	0	0.120985	0.102302	7e-06	0.022172	2e-06	36	145
Alveolates-Ciliates_Cryptophytes	KY290313.1.1621_U	Alveolates-Ciliates	Spirotrichea	Eukaryota; Alveolata; Ciliophora; Spirotrichea; Choreotrichida; Leegaardiellidae_B; Leegaardiella; Leegaardiella_sp.;	GQ863814.1.1651_U	Cryptophytes	Other-unclassified	Eukaryota; Hacrobia; Cryptophyta; Cryptophyceae; Cryptophyceae_X; Goniomonadales; Goniomonas; Goniomonas_sp.;	-0.683033	-0.683033	-0.683033	1	1	18	0	0.007	-0.560355	0.012581	0.578205	0.018969	-3	-0.707821	0.000698	-0.707821	0.000698	0	0.055193	0.042788	4e-06	0.006007	1e-06	36	146
Stramenopiles-MAST_Stramenopiles-MAST	JQ782004.1.1784_U	Stramenopiles-MAST	MAST-1	Eukaryota; Stramenopiles; Stramenopiles_X; MAST; MAST-1; MAST-1C; MAST-1C_X; MAST-1C_X_sp.;	KF129967.1.1739_U	Stramenopiles-MAST	MAST-9	Eukaryota; Stramenopiles; Stramenopiles_X; MAST; MAST-9; MAST-9A; MAST-9A_X; MAST-9A_X_sp.;	-0.63023	-0.63023	-0.63023	1	1	19	0	0.027	-0.759276	0.000163	-0.759276	0.000163	0	-0.71805	0.000536	-0.71805	0.000536	0	0.118689	0.002412	0	0.004995	1e-06	37	38
Stramenopiles-MAST_Alveolates-Dinoflagellates	JQ782004.1.1784_U	Stramenopiles-MAST	MAST-1	Eukaryota; Stramenopiles; Stramenopiles_X; MAST; MAST-1; MAST-1C; MAST-1C_X; MAST-1C_X_sp.;	HQ896315.1.1736_U	Alveolates-Dinoflagellates	Cochlodinium	Eukaryota; Alveolata; Dinophyta; Dinophyceae; Dinophyceae_X; Dinophyceae_XX; Cochlodinium; Cochlodinium_fulvescens;	0.602642	0.602642	0.602642	1	2	18	-1	0.041	0.55075	0.014536	0.699469	0.011346	7	0.511863	0.025069	0.731579	0.006847	7	0.146981	0.047035	3e-06	0.069476	2e-06	37	42
Stramenopiles-MAST_Alveolates-Ciliates	JQ782004.1.1784_U	Stramenopiles-MAST	MAST-1	Eukaryota; Stramenopiles; Stramenopiles_X; MAST; MAST-1; MAST-1C; MAST-1C_X; MAST-1C_X_sp.;	EF100315.1.1329_U	Alveolates-Ciliates	Spirotrichea	Eukaryota; Alveolata; Ciliophora; Spirotrichea; Strombidiida; Strombidiidae_G; Strombidiidae_G_X; Strombidiidae_G_X_sp.;	-0.660206	-0.660206	-0.660206	1	1	19	0	0.015	-0.604907	0.006072	-0.604907	0.006072	0	-0.732425	0.000363	-0.732425	0.000363	0	0.085181	0.026723	2e-06	0.003876	0	37	51
Stramenopiles-MAST_Stramenopiles-Pelagophytes	JQ782004.1.1784_U	Stramenopiles-MAST	MAST-1	Eukaryota; Stramenopiles; Stramenopiles_X; MAST; MAST-1; MAST-1C; MAST-1C_X; MAST-1C_X_sp.;	GU196150.1.1374_U	Stramenopiles-Pelagophytes	Pelagomonadaceae_clade_A	Eukaryota; Stramenopiles; Ochrophyta; Pelagophyceae; Pelagomonadales; Pelagomonadaceae; Pelagomonadaceae_clade_A; Pelagomonadaceae_clade_A_sp.;	0.727384	0.727384	0.727384	1	1	19	0	0.001	0.777179	9e-05	0.777179	9e-05	0	0.732222	0.000365	0.732222	0.000365	0	0.017494	0.001603	0	0.00389	0	37	52
Stramenopiles-MAST_Stramenopiles-Other	JQ782004.1.1784_U	Stramenopiles-MAST	MAST-1	Eukaryota; Stramenopiles; Stramenopiles_X; MAST; MAST-1; MAST-1C; MAST-1C_X; MAST-1C_X_sp.;	EU499990.1.824_U	Stramenopiles-Other	Triparma	Eukaryota; Stramenopiles; Ochrophyta; Bolidophyceae; Parmales; Triparmaceae; Triparma; Triparma_eleuthera;	-0.881211	-0.881211	-0.881211	1	1	19	0	0	-0.84401	6e-06	-0.84401	6e-06	0	-0.936292	0	-0.936292	0	0	0	0.000247	0	4e-06	0	37	59
Stramenopiles-MAST_Stramenopiles-Other	JQ782004.1.1784_U	Stramenopiles-MAST	MAST-1	Eukaryota; Stramenopiles; Stramenopiles_X; MAST; MAST-1; MAST-1C; MAST-1C_X; MAST-1C_X_sp.;	EF695122.1.814_U	Stramenopiles-Other	MOCH-2	Eukaryota; Stramenopiles; Stramenopiles_X; MOCH; MOCH-2; MOCH-2_X; MOCH-2_XX; MOCH-2_XX_sp.;	-0.749999	-0.749999	-0.749999	1	1	19	0	0.001	-0.702171	0.000803	-0.702171	0.000803	0	-0.724396	0.000452	-0.724396	0.000452	0	0.017494	0.006911	1e-06	0.004465	1e-06	37	60
Stramenopiles-MAST_Alveolates-Dinoflagellates	JQ782004.1.1784_U	Stramenopiles-MAST	MAST-1	Eukaryota; Stramenopiles; Stramenopiles_X; MAST; MAST-1; MAST-1C; MAST-1C_X; MAST-1C_X_sp.;	GU825000.1.1197_U	Alveolates-Dinoflagellates	Dinophyceae	Eukaryota; Alveolata; Dinophyta; Dinophyceae; Dinophyceae_X; Dinophyceae_XX; Dinophyceae_XXX; Dinophyceae_XXX_sp.;	-0.703175	-0.703175	-0.703175	1	1	19	0	0.007	-0.694387	0.000971	-0.694387	0.000971	0	-0.765584	0.000133	-0.765584	0.000133	0	0.055193	0.00787	1e-06	0.002039	0	37	64
Stramenopiles-MAST_Alveolates-Dinoflagellates	JQ782004.1.1784_U	Stramenopiles-MAST	MAST-1	Eukaryota; Stramenopiles; Stramenopiles_X; MAST; MAST-1; MAST-1C; MAST-1C_X; MAST-1C_X_sp.;	HE611580.1.1746_U	Alveolates-Dinoflagellates	Gyrodinium	Eukaryota; Alveolata; Dinophyta; Dinophyceae; Dinophyceae_X; Dinophyceae_XX; Gyrodinium; Gyrodinium_sp.;	0.766528	0.766528	0.766528	1	1	19	0	0	0.787646	6.2e-05	0.787646	6.2e-05	0	0.784805	6.9e-05	0.784805	6.9e-05	0	0	0.001247	0	0.001334	0	37	65
Stramenopiles-MAST_Alveolates-Dinoflagellates	JQ782004.1.1784_U	Stramenopiles-MAST	MAST-1	Eukaryota; Stramenopiles; Stramenopiles_X; MAST; MAST-1; MAST-1C; MAST-1C_X; MAST-1C_X_sp.;	HM581766.1.1782_U	Alveolates-Dinoflagellates	Prorocentrum	Eukaryota; Alveolata; Dinophyta; Dinophyceae; Dinophyceae_X; Dinophyceae_XX; Prorocentrum; Prorocentrum_sp.;	0.677824	0.677824	0.677824	2	2	18	0	0.009	0.714805	0.000583	0.714805	0.000583	0	0.745391	0.00025	0.745391	0.00025	0	0.063892	0.005617	1e-06	0.003043	0	37	66
Stramenopiles-MAST_Alveolates-Ciliates	JQ782004.1.1784_U	Stramenopiles-MAST	MAST-1	Eukaryota; Stramenopiles; Stramenopiles_X; MAST; MAST-1; MAST-1C; MAST-1C_X; MAST-1C_X_sp.;	JX188331.1.1726_U	Alveolates-Ciliates	Oligohymenophorea	Eukaryota; Alveolata; Ciliophora; Oligohymenophorea; Scuticociliatia; Scuticociliatia-1; Scuticociliatia-1_X; Scuticociliatia-1_X_sp.;	-0.807067	-0.807067	-0.807067	2	2	18	0	0.001	-0.840088	7e-06	-0.840088	7e-06	0	-0.783143	7.3e-05	-0.783143	7.3e-05	0	0.017494	0.000283	0	0.001385	0	37	69
Stramenopiles-MAST_Alveolates-Dinoflagellates	JQ782004.1.1784_U	Stramenopiles-MAST	MAST-1	Eukaryota; Stramenopiles; Stramenopiles_X; MAST; MAST-1; MAST-1C; MAST-1C_X; MAST-1C_X_sp.;	HM561067.1.974_U	Alveolates-Dinoflagellates	Dinophyceae	Eukaryota; Alveolata; Dinophyta; Dinophyceae; Dinophyceae_X; Dinophyceae_XX; Dinophyceae_XXX; Dinophyceae_XXX_sp.;	-0.734678	-0.734678	-0.734678	1	1	19	0	0.004	-0.744726	0.000255	-0.744726	0.000255	0	-0.820018	1.7e-05	-0.820018	1.7e-05	0	0.040295	0.003231	0	0.000557	0	37	71
Stramenopiles-MAST_Alveolates-Dinoflagellates	JQ782004.1.1784_U	Stramenopiles-MAST	MAST-1	Eukaryota; Stramenopiles; Stramenopiles_X; MAST; MAST-1; MAST-1C; MAST-1C_X; MAST-1C_X_sp.;	EU780629.1.1715_U	Alveolates-Dinoflagellates	Dinophyceae	Eukaryota; Alveolata; Dinophyta; Dinophyceae; Dinophyceae_X; Dinophyceae_XX; Dinophyceae_XXX; Dinophyceae_XXX_sp.;	-0.613166	-0.613166	-0.613166	1	3	17	-2	0.042	-0.115302	0.638325	-0.75563	0.000451	-2	-0.229148	0.345341	-0.75951	0.000405	-2	0.148696	0.468486	1e-06	0.364828	0	37	73
Stramenopiles-MAST_Alveolates-Ciliates	JQ782004.1.1784_U	Stramenopiles-MAST	MAST-1	Eukaryota; Stramenopiles; Stramenopiles_X; MAST; MAST-1; MAST-1C; MAST-1C_X; MAST-1C_X_sp.;	AY665059.1.1720_U	Alveolates-Ciliates	Oligohymenophorea	Eukaryota; Alveolata; Ciliophora; Oligohymenophorea; Scuticociliatia; Scuticociliatia-1; Scuticociliatia-1_X; Scuticociliatia-1_X_sp.;	-0.740786	-0.740786	-0.740786	1	1	19	0	0.001	-0.826026	1.3e-05	-0.826026	1.3e-05	0	-0.794027	4.9e-05	-0.794027	4.9e-05	0	0.017494	0.000424	0	0.001054	0	37	77
Stramenopiles-MAST_Rhizaria-Acantharia	JQ782004.1.1784_U	Stramenopiles-MAST	MAST-1	Eukaryota; Stramenopiles; Stramenopiles_X; MAST; MAST-1; MAST-1C; MAST-1C_X; MAST-1C_X_sp.;	HM561210.1.973_U	Rhizaria-Acantharia	Acantharea	Eukaryota; Rhizaria; Radiolaria; Acantharea; Acantharea_X; Acantharea_XX; Acantharea_XXX; Acantharea_XXX_sp.;	-0.613333	-0.613333	-0.613333	1	1	19	0	0.042	-0.788739	6e-05	-0.788739	6e-05	0	-0.701801	0.000811	-0.701801	0.000811	0	0.148696	0.001219	0	0.006726	1e-06	37	80
Stramenopiles-MAST_Alveolates-Dinoflagellates	JQ782004.1.1784_U	Stramenopiles-MAST	MAST-1	Eukaryota; Stramenopiles; Stramenopiles_X; MAST; MAST-1; MAST-1C; MAST-1C_X; MAST-1C_X_sp.;	GU823932.1.1202_U	Alveolates-Dinoflagellates	Dinophyceae	Eukaryota; Alveolata; Dinophyta; Dinophyceae; Dinophyceae_X; Dinophyceae_XX; Dinophyceae_XXX; Dinophyceae_XXX_sp.;	-0.632437	-0.632437	-0.632437	5	1	14	4	0.022	0.095193	0.698277	-0.837903	9.6e-05	4	0.140899	0.565053	-0.9078	3e-06	4	0.106234	0.490606	0	0.477098	0	37	81
Stramenopiles-MAST_Archaeplastids-Chlorophytes	JQ782004.1.1784_U	Stramenopiles-MAST	MAST-1	Eukaryota; Stramenopiles; Stramenopiles_X; MAST; MAST-1; MAST-1C; MAST-1C_X; MAST-1C_X_sp.;	EU143529.1.906_U	Archaeplastids-Chlorophytes	Pyramimonadales	Eukaryota; Archaeplastida; Chlorophyta; Pyramimonadales; Pyramimonadales_X; Pyramimonadales_XX; Pterosperma; Pterosperma_sp.;	0.600523	0.600523	0.600523	1	1	19	0	0.048	0.517626	0.023212	0.637902	0.018985	-6	0.66652	0.001831	0.66652	0.001831	0	0.158724	0.064402	4e-06	0.01152	1e-06	37	84
Stramenopiles-MAST_Alveolates-Ciliates	JQ782004.1.1784_U	Stramenopiles-MAST	MAST-1	Eukaryota; Stramenopiles; Stramenopiles_X; MAST; MAST-1; MAST-1C; MAST-1C_X; MAST-1C_X_sp.;	HQ866199.1.872_U	Alveolates-Ciliates	Spirotrichea	Eukaryota; Alveolata; Ciliophora; Spirotrichea; Strombidiida_F; Strombidiida_F_X; Strombidiida_F_XX; Strombidiida_F_XX_sp.;	0.678021	0.678021	0.678021	3	3	16	0	0.005	0.669344	0.001722	0.669344	0.001722	0	0.473869	0.040405	0.473869	0.040405	0	0.0456	0.011745	1e-06	0.095687	6e-06	37	88
Stramenopiles-MAST_Alveolates-Dinoflagellates	JQ782004.1.1784_U	Stramenopiles-MAST	MAST-1	Eukaryota; Stramenopiles; Stramenopiles_X; MAST; MAST-1; MAST-1C; MAST-1C_X; MAST-1C_X_sp.;	FN690213.1.1686_U	Alveolates-Dinoflagellates	Dinophyceae	Eukaryota; Alveolata; Dinophyta; Dinophyceae; Dinophyceae_X; Dinophyceae_XX; Dinophyceae_XXX; Dinophyceae_XXX_sp.;	0.604507	0.604507	0.604507	2	1	13	1	0.036	0.048821	0.842672	0.562855	0.015019	1	0.092788	0.70557	-0.451137	0.069123	-2	0.137718	0.536803	3e-06	0.531293	8e-06	37	91
Stramenopiles-MAST_Alveolates-Dinoflagellates	JQ782004.1.1784_U	Stramenopiles-MAST	MAST-1	Eukaryota; Stramenopiles; Stramenopiles_X; MAST; MAST-1; MAST-1C; MAST-1C_X; MAST-1C_X_sp.;	EU793087.1.924_U	Alveolates-Dinoflagellates	Dinophyceae	Eukaryota; Alveolata; Dinophyta; Dinophyceae; Dinophyceae_X; Dinophyceae_XX; Dinophyceae_XXX; Dinophyceae_XXX_sp.;	0.702866	0.702866	0.702866	1	1	19	0	0.007	0.812699	2.4e-05	0.812699	2.4e-05	0	0.759438	0.000162	0.759438	0.000162	0	0.055193	0.000626	0	0.002322	0	37	97
Stramenopiles-MAST_Alveolates-Syndiniales	JQ782004.1.1784_U	Stramenopiles-MAST	MAST-1	Eukaryota; Stramenopiles; Stramenopiles_X; MAST; MAST-1; MAST-1C; MAST-1C_X; MAST-1C_X_sp.;	GU820270.1.1197_U	Alveolates-Syndiniales	Dino-Group-I	Eukaryota; Alveolata; Dinophyta; Syndiniales; Dino-Group-I; Dino-Group-I-Clade-6; Dino-Group-I-Clade-6_X; Dino-Group-I-Clade-6_X_sp.;	0.610449	0.610449	0.610449	1	2	18	-1	0.039	0.452797	0.051567	0.675054	0.004115	-3	0.338313	0.156559	0.767134	0.000524	-3	0.143381	0.108035	2e-06	0.228224	1e-06	37	104
Stramenopiles-MAST_Stramenopiles-MAST	JQ782004.1.1784_U	Stramenopiles-MAST	MAST-1	Eukaryota; Stramenopiles; Stramenopiles_X; MAST; MAST-1; MAST-1C; MAST-1C_X; MAST-1C_X_sp.;	EU499985.1.853_U	Stramenopiles-MAST	MAST-7	Eukaryota; Stramenopiles; Stramenopiles_X; MAST; MAST-7; MAST-7B; MAST-7B_X; MAST-7B_X_sp.;	0.623511	0.623511	0.623511	3	2	17	1	0.032	0.53022	0.019531	0.648249	0.022613	7	0.539948	0.017018	0.622934	0.005753	1	0.129095	0.057225	4e-06	0.053613	2e-06	37	110
Stramenopiles-MAST_Alveolates-Dinoflagellates	JQ782004.1.1784_U	Stramenopiles-MAST	MAST-1	Eukaryota; Stramenopiles; Stramenopiles_X; MAST; MAST-1; MAST-1C; MAST-1C_X; MAST-1C_X_sp.;	AY664921.1.1754_U	Alveolates-Dinoflagellates	Prorocentrum	Eukaryota; Alveolata; Dinophyta; Dinophyceae; Dinophyceae_X; Dinophyceae_XX; Prorocentrum; Prorocentrum_sp.;	0.71651	0.71651	0.71651	2	2	18	0	0.003	0.516948	0.023425	0.572578	0.032358	-5	0.772069	0.000108	0.772069	0.000108	0	0.033974	0.064807	5e-06	0.001769	0	37	111
Stramenopiles-MAST_Alveolates-Ciliates	JQ782004.1.1784_U	Stramenopiles-MAST	MAST-1	Eukaryota; Stramenopiles; Stramenopiles_X; MAST; MAST-1; MAST-1C; MAST-1C_X; MAST-1C_X_sp.;	DQ120009.1.1729_U	Alveolates-Ciliates	Litostomatea	Eukaryota; Alveolata; Ciliophora; Litostomatea; Cyclotrichia; Cyclotrichia_X; Cyclotrichia_XX; Cyclotrichia_XX_sp.;	-0.719302	-0.719302	-0.719302	1	1	19	0	0.002	-0.784232	7.1e-05	-0.784232	7.1e-05	0	-0.77612	9.4e-05	-0.77612	9.4e-05	0	0.026563	0.001362	0	0.001631	0	37	113
Stramenopiles-MAST_Alveolates-Dinoflagellates	JQ782004.1.1784_U	Stramenopiles-MAST	MAST-1	Eukaryota; Stramenopiles; Stramenopiles_X; MAST; MAST-1; MAST-1C; MAST-1C_X; MAST-1C_X_sp.;	FN690221.1.1692_U	Alveolates-Dinoflagellates	Dinophyceae	Eukaryota; Alveolata; Dinophyta; Dinophyceae; Dinophyceae_X; Dinophyceae_XX; Dinophyceae_XXX; Dinophyceae_XXX_sp.;	0.780424	0.780424	0.780424	1	1	19	0	0.002	0.714375	0.00059	0.714375	0.00059	0	0.784021	7.1e-05	0.784021	7.1e-05	0	0.026563	0.005645	1e-06	0.001353	0	37	118
Stramenopiles-MAST_Stramenopiles-MAST	JQ782004.1.1784_U	Stramenopiles-MAST	MAST-1	Eukaryota; Stramenopiles; Stramenopiles_X; MAST; MAST-1; MAST-1C; MAST-1C_X; MAST-1C_X_sp.;	KC582992.1.1792_U	Stramenopiles-MAST	MAST-3	Eukaryota; Stramenopiles; Stramenopiles_X; MAST; MAST-3; MAST-3L; MAST-3L_X; MAST-3L_X_sp.;	-0.826025	-0.826025	-0.826025	1	1	19	0	0	-0.854769	3e-06	-0.854769	3e-06	0	-0.846728	5e-06	-0.846728	5e-06	0	0	0.000175	0	0.000244	0	37	119
Stramenopiles-MAST_Stramenopiles-Other	JQ782004.1.1784_U	Stramenopiles-MAST	MAST-1	Eukaryota; Stramenopiles; Stramenopiles_X; MAST; MAST-1; MAST-1C; MAST-1C_X; MAST-1C_X_sp.;	EF695169.1.817_U	Stramenopiles-Other	Florenciellales	Eukaryota; Stramenopiles; Ochrophyta; Dictyochophyceae; Dictyochophyceae_X; Florenciellales; Florenciellales_X; Florenciellales_X_sp.;	0.591707	0.591707	0.591707	2	3	17	-1	0.045	0.718566	0.000528	0.718566	0.000528	0	0.638999	0.003227	0.640991	0.018235	-6	0.153058	0.005239	1e-06	0.017019	4e-06	37	121
Stramenopiles-MAST_Alveolates-Ciliates	JQ782004.1.1784_U	Stramenopiles-MAST	MAST-1	Eukaryota; Stramenopiles; Stramenopiles_X; MAST; MAST-1; MAST-1C; MAST-1C_X; MAST-1C_X_sp.;	KC582955.1.1774_U	Alveolates-Ciliates	Spirotrichea	Eukaryota; Alveolata; Ciliophora; Spirotrichea; Strombidiida; Strombidiida_X; Strombidiida_XX; Strombidiida_XX_sp.;	-0.599752	-0.599752	-0.599752	1	1	19	0	0.048	-0.607829	0.005767	-0.607829	0.005767	0	-0.697981	0.00089	-0.697981	0.00089	0	0.158724	0.025826	2e-06	0.007174	1e-06	37	125
Stramenopiles-MAST_Haptophytes	JQ782004.1.1784_U	Stramenopiles-MAST	MAST-1	Eukaryota; Stramenopiles; Stramenopiles_X; MAST; MAST-1; MAST-1C; MAST-1C_X; MAST-1C_X_sp.;	HG970975	Haptophytes	Haptophyta	Eukaryota; Hacrobia; Haptophyta; Haptophyta_X; Haptophyta_XX; Haptophyta_XXX; Haptophyta_XXXX; Haptophyta_XXXX_sp.;	0.78904	0.78904	0.78904	1	1	19	0	0	0.873038	1e-06	0.873038	1e-06	0	0.850242	4e-06	0.850242	4e-06	0	0	8.8e-05	0	0.000221	0	37	126
[truncated: 953 more rows]
