# Supplementary material
Source: Frontiers journal article supplement (https://www.frontiersin.org/articles/412501)
Supplement: Table_5.XLSX [file Table_5.XLSX]

## Sheet: TableS5
Table S5.
		Environmental parameter:
Taxonomic Group	Taxonomic sub-group	Chl	DO	Sal	Temp
Alveolates-Ciliates	Colpodea	1	0	0	2
	Oligohymenophorea	0	1	0	0
	Spirotrichea	0	3	2	0
Alveolates-Dinoflagellates	Azadinium	1	1	0	0
	Dinophyceae	2	1	4	2
	Prorocentrum	1	0	0	0
	Protoperidinium	1	1	1	0
Alveolates-Syndiniales	Dino-Group-I	0	0	1	0
	Dino-Group-II	1	0	0	1
Cryptophytes	Other-unclassified	0	1	0	1
Stramenopiles-Chrysophytes	Chrysophyceae_Clade-H	0	2	0	0
	Chrysophyceae_Clade-I	0	0	0	1
Stramenopiles-Diatoms	Cylindrotheca	1	0	1	0
	Raphid-pennate	0	1	0	1
Stramenopiles-MAST	MAST-1	0	2	1	0
	MAST-2	0	1	0	0
	MAST-3	0	2	1	1
	MAST-7	0	1	0	0
Stramenopiles-Other	Aplanochytrium	0	1	1	1
	Dictyochales	0	0	1	0
	Florenciellales	0	0	0	1
	MOCH-2	0	2	1	0
	Rhizochromulinales	0	0	0	1
	Triparma	0	0	1	0
Stramenopiles-Pelagophytes	Pelagomonadaceae_clade_A	0	1	0	0
